# Supplementary material
Source: Royal Society of Chemistry journal article supplement (doi:10.1039/d6gc00555a)

# *Supporting Information*

## **Synchronous recognition of P–intermediates and nucleophiles empowers diversified trivalent phosphorus synthesis**

Xue Liu<sup>1‡</sup>, Jingcheng Hu<sup>1‡</sup>, Chengbiao Zhu<sup>1</sup>, Dake Wang<sup>1</sup>, Jia Yan<sup>1</sup>, Jinyu Wang<sup>3</sup>,  
Zhenwei Wei<sup>1\*</sup>, Yong Yuan<sup>2\*</sup>, Hong Yi<sup>1\*</sup>, Aiwen Lei<sup>1\*</sup>

<sup>1</sup> The Institute for Advanced Studies (IAS), College of Chemistry and Molecular Sciences; Wuhan University; Wuhan, 430072, P. R. China.

<sup>2</sup> College of Chemistry and Chemical Engineering, Northwest Normal University, Lanzhou, 730070, P. R. China.

<sup>3</sup> State Key Laboratory of Chemistry for NBC Hazards Protection; Beijing, 102205, P. R. China.

<sup>‡</sup>These authors contributed equally to this work.

\* Aiwen Lei. [aiwenlei@whu.edu.cn](mailto:aiwenlei@whu.edu.cn), [hong.yi@whu.edu.cn](mailto:hong.yi@whu.edu.cn), [yuan Yong@nwnu.edu.cn](mailto:yuan Yong@nwnu.edu.cn), [weizw2021@whu.edu.cn](mailto:weizw2021@whu.edu.cn)

## Contents

|                                                                                            |    |
|--------------------------------------------------------------------------------------------|----|
| <b>1. General Information</b> .....                                                        | 3  |
| <b>1.1. Reagents, solvents and experimental conditions</b> .....                           | 3  |
| <b>1.2. Analytical techniques</b> .....                                                    | 3  |
| <b>1.3. Compound purification</b> .....                                                    | 3  |
| <b>1.4. Electrochemical set-up</b> .....                                                   | 3  |
| <b>2. Importance of Bidentate Phosphine Ligands (III)</b> .....                            | 3  |
| <b>3. Experimental Procedures for the Electrolysis</b> .....                               | 4  |
| <b>3.1. The condition optimized for the synthesis of 3a</b> .....                          | 4  |
| <b>3.2. The condition optimized for the synthesis of 3aj</b> .....                         | 4  |
| <b>4. Experimental Procedures and Characterization Data</b> .....                          | 5  |
| <b>4.1. Synthesis of compound 3</b> .....                                                  | 5  |
| <b>4.2. Synthesis of compound 4</b> .....                                                  | 25 |
| <b>4.3. Synthesis of intermediates</b> .....                                               | 40 |
| <b>4.4. Gram scale experiment</b> .....                                                    | 40 |
| <b>4.5. Unsuccessful examples</b> .....                                                    | 41 |
| <b>5. Experimental Procedures for Control Experiment</b> .....                             | 41 |
| <b>6. Electrochemical Procedures for Cyclic Voltammetry</b> .....                          | 42 |
| <b>7. Experimental Procedures for Sampling Experiment</b> .....                            | 45 |
| <b>8. Experimental Procedures for Electron Paramagnetic Resonance (EPR) Experiment</b> ... | 48 |
| <b>9. Experimental Procedures for Radical Capture Experiment</b> .....                     | 49 |
| <b>10. Experimental Procedures for Operando EC-MS</b> .....                                | 50 |
| <b>10.1. Reagents and materials</b> .....                                                  | 50 |
| <b>10.2. Electrospray ionization source emitters</b> .....                                 | 50 |
| <b>10.3. Mass spectrometry</b> .....                                                       | 50 |
| <b>10.4. Online electrochemical reactions</b> .....                                        | 50 |
| <b>10.5. EC oxidation of 2a' to 2a'' observed in positive mode HRMS</b> .....              | 51 |
| <b>11. References</b> .....                                                                | 53 |
| <b>12. Spectral Data</b> .....                                                             | 54 |

# 1. General Information

## 1.1. Reagents, solvents and experimental conditions

All reactions were carried out under an atmosphere of argon in oven-dried glassware, unless otherwise noted. The solvent uses innochem's ultra-dry acetonitrile. Except where stated, all starting materials were commercially available and used without further purification.

## 1.2. Analytical techniques

Chronoamperometry and cyclic voltammograms were obtained on a CorrTest® CS2350H bipotentiostat. Hydrogen gas content was analyzed by gas chromatography (GC9790 Plus, Fuli, China, TCD, N<sub>2</sub> as a carrier gas and 5 Å molecular sieve column, a thermal conductivity detector). GC yields were recorded by SHIMADZU™ GC-2014 gas chromatography. Molecular weights of products were determined by SHIMADZU™ GCMS-QP2010 SE gas chromatography mass spectrometry. All new compounds were characterized by high resolution mass spectra (HRMS). All undivided cells were purchased from Jiehengda® limited liability company (<https://www.whjehengda.com>).

<sup>1</sup>H, <sup>13</sup>C, <sup>19</sup>F and <sup>31</sup>P NMR data were recorded with Bruker Advance III (400 MHz) spectrometers with tetramethylsilane as an internal standard. All chemical shifts ( $\delta$ ) are reported in ppm and coupling constants ( $J$ ) in Hz. All chemical shifts are reported relative to tetramethylsilane and d-solvent peaks (77.00 ppm, chloroform, 39.60 ppm, dimethylsulfoxide), respectively.

## 1.3. Compound purification

Thin layer chromatography (TLC) employed glass 0.25 mm silica gel plates. Visualization of spots on TLC plate was accomplished with UV light (254 nm). Flash chromatography columns were packed with 200-300 silica gel in petroleum (b.p. 60-90 °C).

## 1.4. Electrochemical set-up

The instrument for electrolysis was Current (HSPY-120-01) (made in China).

# 2. Importance of Bidentate Phosphine Ligands (III)

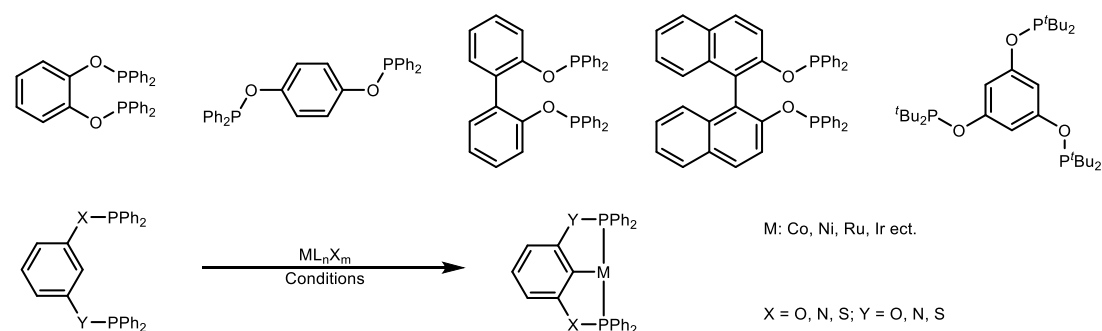

Fig. S1 Importance of bidentate phosphine ligands (III)

Organic molecules bearing X–Y bonds are pervasive. A particularly consequential family comprises trivalent phosphines with P–X units, which are central ligands across transition-metal catalysis and have propelled advances in organometallic chemistry. Chelating (bi- and multidentate) phosphines incorporating P–X motifs are widely paired with Rh, Ir, Co and Ni; notably, 1,3-disubstituted arenes preorganize scaffolds that serve as privileged pincer precursors.

### 3. Experimental Procedures for the Electrolysis

#### 3.1. The condition optimized for the synthesis of 3a

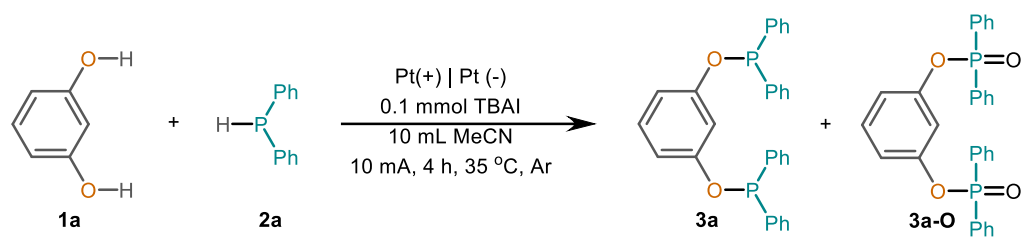

| entry | variation from standard conditions | yield of 3a <sup>a</sup> | yield of 3a-O <sup>a</sup> |
|-------|------------------------------------|--------------------------|----------------------------|
| 1     | none                               | 91% (90%) <sup>b</sup>   | 1%                         |
| 2     | DMF instead of MeCN                | 12%                      | 10%                        |
| 3     | DCM instead of MeCN                | 45%                      | 8%                         |
| 4     | TEAI instead of TBAI               | 75%                      | 5%                         |
| 5     | NH <sub>4</sub> I instead of TBAI  | 16%                      | 14%                        |
| 6     | NaI instead of TBAI                | 63%                      | 2%                         |
| 7     | KI instead of TBAI                 | 83%                      | 2%                         |
| 8     | TBAB instead of TBAI               | 26%                      | 7%                         |
| 9     | TBACl instead of TBAI              | n.d.                     | n.d.                       |
| 10    | TBABF <sub>4</sub> instead of TBAI | 11%                      | 11%                        |
| 11    | CC(+) instead of Pt(+)             | 61%                      | 13%                        |
| 12    | CF(+) instead of Pt(+)             | 65%                      | 2%                         |
| 13    | CP(+) instead of Pt(+)             | 36%                      | 5%                         |
| 14    | CC(-) instead of Pt(-)             | 58%                      | 7%                         |
| 15    | SS(-) instead of Pt(-)             | 2%                       | 1%                         |
| 16    | r.t. instead of 35 °C              | 85%                      | 4%                         |
| 17    | 45 °C instead of 35 °C             | 90%                      | 5%                         |
| 18    | 5 mA, 8 h instead of 10 mA, 4 h    | 88%                      | 6%                         |
| 19    | 20 mA, 2 h instead of 10 mA, 4 h   | 65%                      | 6%                         |
| 20    | no electricity                     | n.d.                     | n.d.                       |

Table S1. <sup>a</sup> Reaction conditions: platinum plate (15 mm × 15 mm × 0.3 mm) as the anode, platinum plate (15 mm × 15 mm × 0.3 mm) as the cathode, undivided cell, 1a (0.25 mmol), 2a (0.7 mmol), TBAI (0.1 mmol), MeCN (10.0 mL), Ar, 35 °C, 10.0 mA, 4 h, yield was determined by assure <sup>31</sup>P NMR with triethyl phosphate oxide as internal standard. <sup>b</sup> Isolated yield.

#### 3.2. The condition optimized for the synthesis of 3aj

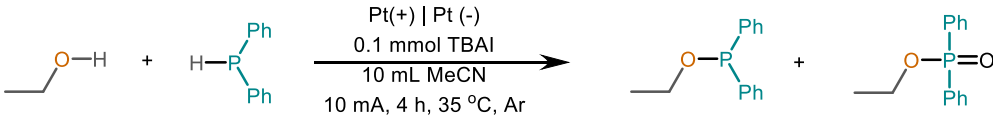

| entry | variation from standard conditions      | yield of <b>3aj</b> <sup>a</sup> | yield of <b>3aj-O</b> <sup>a</sup> |
|-------|-----------------------------------------|----------------------------------|------------------------------------|
| 1     | none                                    | 79%                              | 17%                                |
| 2     | CC(+) instead of Pt(+)                  | 23%                              | 21%                                |
| 3     | CP(-) instead of Pt(-)                  | 10%                              | 11%                                |
| 4     | 20 mA, 2 h instead of 10 mA, 4 h        | 54%                              | 21%                                |
| 5     | 15 mA, 2 h 40 min instead of 10 mA, 4 h | 61%                              | 20%                                |
| 6     | 5 mA, 8 h instead of 10 mA, 4 h         | 27%                              | 12%                                |
| 7     | KI instead of TBAI                      | 54%                              | 44%                                |

Table S2. <sup>a</sup> Reaction conditions: platinum plate (15 mm × 15 mm × 0.3 mm) as the anode, platinum plate (15 mm × 15 mm × 0.3 mm) as the cathode, undivided cell, **1aj** (1.0 mmol), **2a** (0.5 mmol), TBAI (0.1 mmol), MeCN (10.0 mL), Ar, 35 °C, 10.0 mA, 4 h, yield was determined by assure <sup>31</sup>P NMR with triethyl phosphate oxide as internal standard.

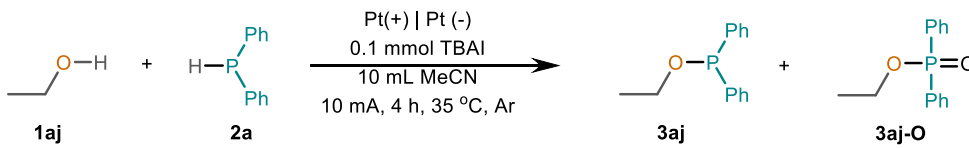

| Entry | Variation   | Yield of <b>3aj</b> <sup>a</sup> | Yield of <b>3aj-O</b> <sup>a</sup> |
|-------|-------------|----------------------------------|------------------------------------|
| 1     | none        | 79%                              | 17%                                |
| 2     | AC, 1/20 Hz | 97%                              | 3%                                 |

Table S3. <sup>a</sup> Reaction conditions: platinum plate (1.5 × 1.5 × 0.03 cm<sup>3</sup>) as the anode, platinum plate (1.5 × 1.5 × 0.03 cm<sup>3</sup>) as the cathode, undivided cell, **1aj** (1.0 mmol), **2a** (0.5 mmol), TBAI (0.1 mmol), MeCN (10.0 mL), AC power (10 mA, D = 50%), Ar, 35 °C, 4 h. Yield was determined by assure <sup>31</sup>P NMR with triethyl phosphate oxide as internal standard.

## 4. Experimental Procedures and Characterization Data

### 4.1. Synthesis of compound 3

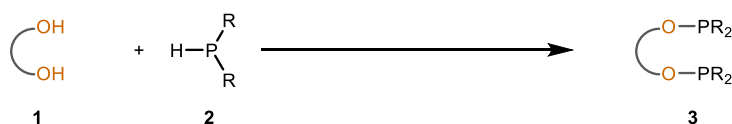

**Method A for the preparation of compound 3 (3a-3p,3s-3u):** In an oven-dried undivided tube (25.0 mL) equipped with a stir bar. The tube was equipped with a platinum plate (1.5 × 1.5 × 0.03 cm<sup>3</sup>) as the anode and a platinum plate (1.5 × 1.5 × 0.03 cm<sup>3</sup>) as the cathode. The distance of electrodes is 0.6 cm. Bisphenol (**1**, 0.25 mmol), TBAI (36.9 mg, 0.1 mmol) were added. This was followed by the addition of diphenylphosphane or di-tert-butylphosphine (**2**, 0.7 mmol) and extra

dry acetonitrile (10 mL) in a glovebox ( $\text{H}_2\text{O}$  and  $\text{O}_2 < 0.1$  ppm). Then the mixture was stirred at a constant current of 10.0 mA at 35 °C for 4 h ( $J = 4.4 \text{ mA/cm}^2$ , 6.0 F/mol).

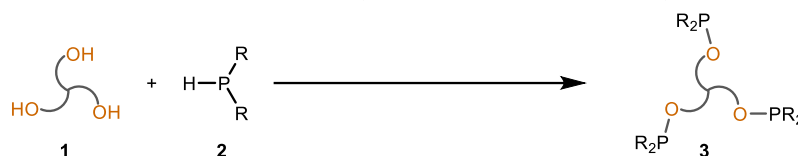

**Method B for the preparation of compound 3 (3q-3r):** Otherwise above method A, diphenylphosphane (**2a**, 1.00 mmol) was added, the mixtures were stirred at a constant current of 10 mA at 35 °C for 5 h ( $J = 4.4 \text{ mA/cm}^2$ , 7.5 F/mol).

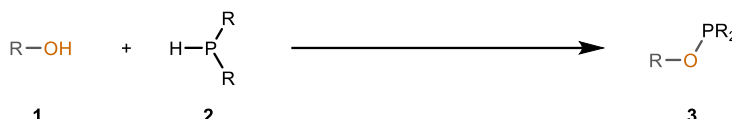

**Method C for the preparation of compound 3 (3v-3ai):** In an oven-dried undivided tube (25.0 mL) equipped with a stir bar. The tube was equipped with a platinum plate ( $1.5 \times 1.5 \times 0.03 \text{ cm}^3$ ) as the anode and a platinum plate ( $1.5 \times 1.5 \times 0.03 \text{ cm}^3$ ) as the cathode. The distance of electrodes is 0.6 cm. Phenol (**1**, 1.0 mmol), TBAI (36.9 mg, 0.1 mmol) were added. This was followed by the addition of diphenylphosphane (**2a**, 0.5 mmol) and extra dry acetonitrile (10 mL) in a glovebox ( $\text{H}_2\text{O}$  and  $\text{O}_2 < 0.1$  ppm). Then the mixture was stirred at a constant current of 10.0 mA at 35 °C for 3 h ( $J = 4.4 \text{ mA/cm}^2$ , 2.2 F/mol).

**Method D for the preparation of compound 3 (3aj-3at):** Otherwise above method C, Then the mixture was stirred at an alternating current of 10 mA (1/20 Hz, duty ratio (D) = 50%) at 35 °C for 4 h ( $J = 4.4 \text{ mA/cm}^2$ , 3.0 F/mol).

**Method E for the preparation of compound 3 (3au-3av):** Otherwise above method D, secondary alcohol (**1**, 6.0 mmol) added.

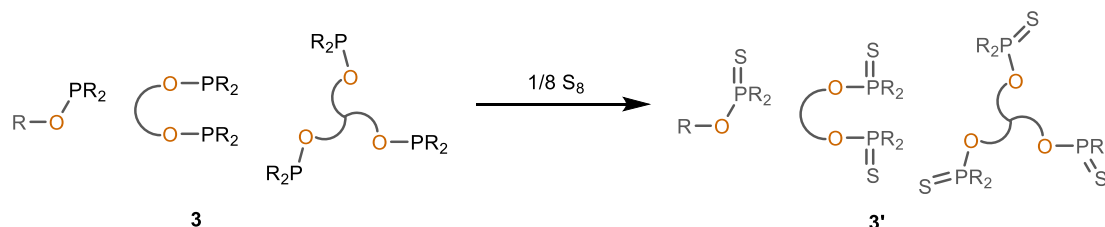

**Fig. S2 Method for determining separation yield**

Because the products are readily oxidized upon exposure to air, isolating them in pure form by routine methods such as flash chromatography proved challenging. To preserve product integrity,  $\text{S}_8$  (1/8 equiv. per P atom) was added to the reaction mixture upon completion, and the mixture was stirred for 30 minutes to suppress oxidation. The desired products were then obtained in pure form after purification by flash chromatography on 200–300 mesh silica gel (petroleum: EtOAc = 50: 1).

*O,O'*-(1,3-phenylene) bis(diphenylphosphinothioate) (**3a'**)

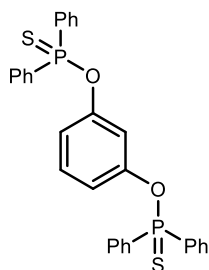

Synthesized by method A using diphenylphosphane (135  $\mu$ L, 0.7 mmol) and resorcinol (27.5 mg, 0.25 mmol), followed by further purification to obtained a white solid (122.0 mg, yield 90%).

$^1\text{H}$  NMR (400 MHz, Chloroform-*d*)  $\delta$  7.95 – 7.83 (m, 8H), 7.53 – 7.47 (m, 4H), 7.47 – 7.40 (m, 8H), 7.05 (t,  $J$  = 8.2 Hz, 1H), 6.88 (q,  $J$  = 1.9 Hz, 1H), 6.86 – 6.80 (m, 2H).

$^{13}\text{C}$  NMR (101 MHz, Chloroform-*d*)  $\delta$  150.88 (d,  $J$  = 8.9 Hz), 133.94 (d,  $J$  = 111.0 Hz), 132.07 (d,  $J$  = 3.1 Hz), 131.29 (d,  $J$  = 11.5 Hz), 129.32, 128.48 (d,  $J$  = 13.8 Hz), 118.13 (dd,  $J$  = 5.1, 1.5 Hz), 115.74 (t,  $J$  = 5.2 Hz).

$^{31}\text{P}$  NMR (162 MHz, Chloroform-*d*)  $\delta$  82.62.

HRMS (ESI,  $m/z$ ): calcd for  $\text{C}_{30}\text{H}_{24}\text{O}_2\text{P}_2\text{S}_2$   $[\text{M}+\text{H}]^+$ : 543.0766 found: 543.0763.

*O,O'*-(5-methyl-1,3-phenylene) bis(diphenylphosphinothioate) (**3b'**)

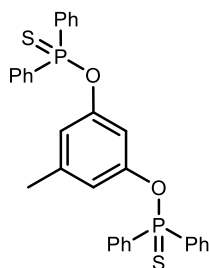

Synthesized by method A using diphenylphosphane (135  $\mu$ L, 0.7 mmol) and 5-methylbenzene-1,3-diol (31.0 mg, 0.25 mmol), followed by further purification to obtained a white solid (104.3 mg, yield 75%).

$^1\text{H}$  NMR (400 MHz, Chloroform-*d*)  $\delta$  7.94 – 7.83 (m, 9H), 7.53 – 7.43 (m, 4H), 7.46 – 7.37 (m, 8H), 6.69 – 6.62 (m, 3H), 2.12 (s, 3H).

$^{13}\text{C}$  NMR (101 MHz, Chloroform-*d*)  $\delta$  150.51 (d,  $J$  = 9.4 Hz), 139.93, 134.02 (d,  $J$  = 111.1 Hz), 131.98 (d,  $J$  = 3.1 Hz), 131.21 (d,  $J$  = 11.6 Hz), 128.41 (d,  $J$  = 13.7 Hz), 118.92 (dd,  $J$  = 5.0, 1.7 Hz), 112.52 (t,  $J$  = 5.1 Hz), 21.30.

$^{31}\text{P}$  NMR (162 MHz, Chloroform-*d*)  $\delta$  82.26.

HRMS (ESI,  $m/z$ ): calcd for  $\text{C}_{31}\text{H}_{26}\text{O}_2\text{P}_2\text{S}_2$   $[\text{M}+\text{H}]^+$ : 557.0922 found: 557.0925.

*O,O'*-(5-cyano-1,3-phenylene) bis(diphenylphosphinothioate) (**3c'**)

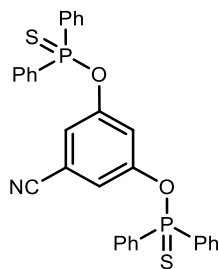

Synthesized by method A using diphenylphosphane (135  $\mu$ L, 0.7 mmol) and 3,5-dihydroxybenzonitrile

(33.8 mg, 0.25 mmol), followed by further purification to obtained a white solid (46.8 mg, yield 33%).  
 $^1\text{H NMR}$  (400 MHz, Chloroform-*d*)  $\delta$  7.93 – 7.83 (m, 8H), 7.59 – 7.51 (m, 4H), 7.51 – 7.43 (m, 8H), 7.17 (p,  $J = 1.9$  Hz, 1H), 7.09 (q,  $J = 1.6$  Hz, 2H).  
 $^{13}\text{C NMR}$  (101 MHz, Chloroform-*d*)  $\delta$  151.22 (d,  $J = 9.0$  Hz), 133.14 (d,  $J = 110.6$  Hz), 132.50 (d,  $J = 3.1$  Hz), 131.24 (d,  $J = 11.8$  Hz), 128.69 (d,  $J = 13.9$  Hz), 121.77 (dd,  $J = 5.1, 1.5$  Hz), 121.09 (t,  $J = 5.1$  Hz), 117.17, 113.13.  
 $^{31}\text{P NMR}$  (162 MHz, Chloroform-*d*)  $\delta$  85.00.  
HRMS (ESI, *m/z*): calcd for  $\text{C}_{31}\text{H}_{23}\text{NO}_2\text{P}_2\text{S}_2$  [ $\text{M}+\text{H}$ ] $^+$ : 568.0718 found: 568.0716.

*O,O'*-(1,2-phenylene) bis(diphenylphosphinothioate) (**3d'**)

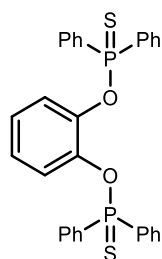

Synthesized by method A using diphenylphosphane (135  $\mu\text{L}$ , 0.7 mmol) and pyrocatechol (27.5 mg, 0.25 mmol), followed by further purification to obtained a white solid (117.9 mg, yield 87%).  
 $^1\text{H NMR}$  (400 MHz, Chloroform-*d*)  $\delta$  7.99 – 7.89 (m, 8H), 7.50 – 7.41 (m, 4H), 7.37 – 7.28 (m, 8H), 7.11 – 7.04 (m, 2H), 6.91 – 6.82 (m, 2H).  
 $^{13}\text{C NMR}$  (101 MHz, Chloroform-*d*)  $\delta$  142.48 (dd,  $J = 8.4, 5.8$  Hz), 134.07 (d,  $J = 110.8$  Hz), 131.97 (d,  $J = 3.1$  Hz), 131.45 (d,  $J = 11.8$  Hz), 128.41 (d,  $J = 13.7$  Hz), 124.51, 121.93 (d,  $J = 5.4$  Hz).  
 $^{31}\text{P NMR}$  (162 MHz, Chloroform-*d*)  $\delta$  82.87.  
HRMS (ESI, *m/z*): calcd for  $\text{C}_{30}\text{H}_{24}\text{O}_2\text{P}_2\text{S}_2$  [ $\text{M}+\text{H}$ ] $^+$ : 543.0766 found: 543.0764.

*O,O'*-(4-methyl-1,2-phenylene) bis(diphenylphosphinothioate) (**3e'**)

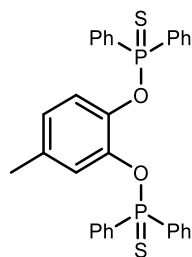

Synthesized by method A using diphenylphosphane (135  $\mu\text{L}$ , 0.7 mmol) and 4-methylbenzene-1,2-diol (31.0 mg, 0.25 mmol), followed by further purification to obtained a white solid (108.4 mg, yield 78%).  
 $^1\text{H NMR}$  (400 MHz, Chloroform-*d*)  $\delta$  7.97 – 7.88 (m, 8H), 7.46 – 7.40 (m, 4H), 7.35 – 7.26 (m, 8H), 6.94 – 6.87 (m, 2H), 6.69 – 6.62 (m, 1H), 2.07 (s, 3H).  
 $^{13}\text{C NMR}$  (101 MHz, Chloroform-*d*)  $\delta$  142.03 (dd,  $J = 8.4, 5.7$  Hz), 140.01 (dd,  $J = 8.4, 5.6$  Hz), 134.66 (d,  $J = 1.4$  Hz), 134.49, 133.56 (d,  $J = 1.2$  Hz), 131.88 (d,  $J = 3.1$  Hz), 131.43 (d,  $J = 2.2$  Hz), 131.31 (d,  $J = 2.2$  Hz), 128.61, 128.40, 128.26, 125.05, 122.51 (d,  $J = 5.2$  Hz), 121.41 (d,  $J = 5.3$  Hz), 20.80.  
 $^{31}\text{P NMR}$  (162 MHz, Chloroform-*d*)  $\delta$  82.79, 82.71.  
HRMS (ESI, *m/z*): calcd for  $\text{C}_{31}\text{H}_{26}\text{O}_2\text{P}_2\text{S}_2$  [ $\text{M}+\text{H}$ ] $^+$ : 557.0922 found: 557.0917.

*O,O'*-(4-(tert-butyl)-1,2-phenylene) bis(diphenylphosphinothioate) (**3f'**)

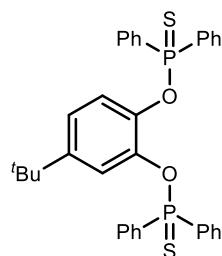

Synthesized by method A using diphenylphosphane (135  $\mu$ L, 0.7 mmol) and 4-(tert-butyl)benzene-1,2-diol (41.5 mg, 0.25 mmol), followed by further purification to obtained a white solid (145.0 mg, yield 97%).

$^1\text{H NMR}$  (400 MHz, Chloroform-*d*)  $\delta$  8.03 – 7.90 (m, 8H), 7.52 – 7.40 (m, 4H), 7.37 – 7.28 (m, 9H), 7.06 – 7.01 (m, 1H), 6.97 – 6.90 (m, 1H), 6.88 – 6.81 (m, 1H), 1.06 – 1.01 (m, 9H).

$^{13}\text{C NMR}$  (101 MHz, Chloroform-*d*)  $\delta$  147.62, 141.74 (dd,  $J = 8.5, 5.8$  Hz), 140.18 – 139.06 (m), 134.70 (d,  $J = 37.5$  Hz), 133.60 (d,  $J = 37.1$  Hz), 131.90 (t,  $J = 2.7$  Hz), 131.63, 131.50 (d,  $J = 3.7$  Hz), 131.36, 128.41 (d,  $J = 6.1$  Hz), 128.28 (d,  $J = 6.1$  Hz), 121.07, 120.88 (d,  $J = 5.5$  Hz), 119.62 (d,  $J = 5.5$  Hz), 34.23, 30.91.

$^{31}\text{P NMR}$  (162 MHz, Chloroform-*d*)  $\delta$  82.41, 82.19.

HRMS (ESI, *m/z*): calcd for  $\text{C}_{34}\text{H}_{32}\text{O}_2\text{P}_2\text{S}_2$  [ $\text{M}+\text{H}$ ] $^+$ : 599.1392 found: 599.1378.

*O,O'*-(4-chloro-1,2-phenylene) bis(diphenylphosphinothioate) (**3g'**)

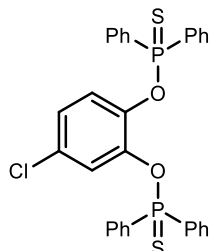

Synthesized by method A using diphenylphosphane (135  $\mu$ L, 0.7 mmol) and 4-chlorocyclohexa-2,4-diene-1,2-diol (36.5 mg, 0.25 mmol), followed by further purification to obtained a white solid (106.6 mg, yield 74%).

$^1\text{H NMR}$  (400 MHz, Chloroform-*d*)  $\delta$  7.97 – 7.86 (m, 8H), 7.50 – 7.41 (m, 4H), 7.37 – 7.28 (m, 8H), 7.12 – 7.07 (m, 1H), 7.02 – 6.97 (m, 1H), 6.87 – 6.81 (m, 1H).

$^{13}\text{C NMR}$  (101 MHz, Chloroform-*d*)  $\delta$  142.82 (dd,  $J = 8.5, 5.6$  Hz), 141.33 (dd,  $J = 8.3, 5.6$  Hz), 134.14 (d,  $J = 9.2$  Hz), 133.04 (d,  $J = 9.2$  Hz), 132.13 (d,  $J = 7.9$  Hz), 132.13 (d,  $J = 1.8$  Hz), 131.92 (d,  $J = 2.2$  Hz), 131.39 (d,  $J = 1.9$  Hz), 131.27 (d,  $J = 2.0$  Hz), 129.16 (d,  $J = 1.7$  Hz), 128.51 (d,  $J = 1.6$  Hz), 128.37 (d,  $J = 1.5$  Hz), 124.56, 122.40 (dd,  $J = 11.1, 5.4$  Hz).

$^{31}\text{P NMR}$  (162 MHz, Chloroform-*d*)  $\delta$  84.29, 83.88.

HRMS (ESI, *m/z*): calcd for  $\text{C}_{30}\text{H}_{23}\text{ClO}_2\text{P}_2\text{S}_2$  [ $\text{M}+\text{H}$ ] $^+$ : 577.0376 found: 577.0363.

*O,O'*-(4-cyano-1,2-phenylene) bis(diphenylphosphinothioate) (**3h'**)

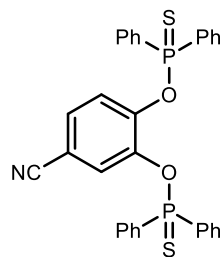

Synthesized by method A using diphenylphosphane (135  $\mu$ L, 0.7 mmol) and 3,4-dihydroxybenzonitrile (33.8 mg, 0.25 mmol), followed by further purification to obtained a white solid (110.6 mg, yield 78%). 83%

$^1\text{H}$  NMR (400 MHz, Chloroform-*d*)  $\delta$  7.97 – 7.85 (m, 8H), 7.56 – 7.44 (m, 4H), 7.41 – 7.29 (m, 9H), 7.26 – 7.17 (m, 2H).

$^{13}\text{C}$  NMR (101 MHz, Chloroform-*d*)  $\delta$  146.85 (dd,  $J = 8.0, 5.2$  Hz), 142.74 (dd,  $J = 8.4, 5.9$  Hz), 133.74 (d,  $J = 10.7$  Hz), 132.65 (d,  $J = 11.0$  Hz), 132.38 (d,  $J = 6.7$  Hz), 132.38, 131.37 (d,  $J = 3.5$  Hz), 131.25 (d,  $J = 3.4$  Hz), 128.92, 128.66 (d,  $J = 3.2$  Hz), 128.52 (d,  $J = 3.3$  Hz), 125.60 (d,  $J = 5.3$  Hz), 122.54 (d,  $J = 5.9$  Hz), 117.57, 107.86.

$^{31}\text{P}$  NMR (162 MHz, Chloroform-*d*)  $\delta$  85.47, 84.73.

HRMS (ESI, *m/z*): calcd for  $\text{C}_{31}\text{H}_{23}\text{NO}_2\text{P}_2\text{S}_2$  [ $\text{M}+\text{H}$ ] $^+$ : 568.0718 found: 568.0715.

#### *O,O'*-(1,4-phenylene) bis(diphenylphosphinothioate) (**3i'**)

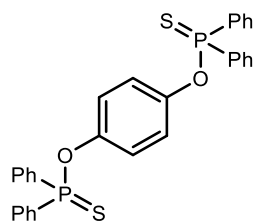

Synthesized by method A using diphenylphosphane (135  $\mu$ L, 0.7 mmol) and hydroquinone (27.5 mg, 0.25 mmol), followed by further purification to obtained a white solid (88.1 mg, yield 65%).

$^1\text{H}$  NMR (400 MHz, Chloroform-*d*)  $\delta$  7.97 – 7.87 (m, 8H), 7.58 – 7.49 (m, 4H), 7.49 – 7.40 (m, 8H), 6.91 – 6.87 (m, 4H).

$^{13}\text{C}$  NMR (101 MHz, Chloroform-*d*)  $\delta$  147.50 – 146.84 (m), 134.10 (d,  $J = 111.0$  Hz), 132.19 – 131.98 (m), 131.34 (d,  $J = 11.8$  Hz), 128.49 (d,  $J = 13.9$  Hz), 122.48 – 122.28 (m).

$^{31}\text{P}$  NMR (162 MHz, Chloroform-*d*)  $\delta$  82.54.

HRMS (ESI, *m/z*): calcd for  $\text{C}_{30}\text{H}_{24}\text{O}_2\text{P}_2\text{S}_2$  [ $\text{M}+\text{H}$ ] $^+$ : 543.0766 found: 543.0765.

#### *O,O'*-(2-methyl-1,4-phenylene) bis(diphenylphosphinothioate) (**3j'**)

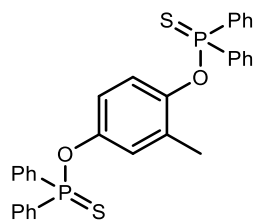

Synthesized by following method A using diphenylphosphane (135  $\mu$ L, 0.7 mmol) and 2-methylbenzene-1,4-diol (31.0 mg, 0.25 mmol), followed by further purification to obtained a white solid (108.4 mg, yield

78%).

$^1\text{H}$  NMR (400 MHz, Chloroform-*d*)  $\delta$  7.99 – 7.87 (m, 8H), 7.54 – 7.38 (m, 12H), 6.89 (d,  $J = 2.9$  Hz, 1H), 6.78 – 6.71 (m, 1H), 6.66 – 6.58 (m, 1H).

$^{13}\text{C}$  NMR (101 MHz, Chloroform-*d*)  $\delta$  146.68 (dd,  $J = 9.0, 1.9$  Hz), 146.11 (dd,  $J = 9.0, 2.0$  Hz), 134.91 (d,  $J = 39.1$  Hz), 133.81 (d,  $J = 39.0$  Hz), 131.99 (d,  $J = 3.1$  Hz), 131.93 (d,  $J = 1.4$  Hz), 131.88 (d,  $J = 1.3$  Hz), 131.16 (d,  $J = 24.3$  Hz), 131.16 (d,  $J = 1.3$  Hz), 128.50 (d,  $J = 6.5$  Hz), 128.37 (d,  $J = 6.5$  Hz), 124.26 (d,  $J = 4.9$  Hz), 121.10 (dd,  $J = 4.5, 1.5$  Hz), 119.21 (dd,  $J = 4.9, 1.5$  Hz), 17.33.

$^{31}\text{P}$  NMR (162 MHz, Chloroform-*d*)  $\delta$  82.22, 81.43 (d,  $J = 2.6$  Hz).

HRMS (ESI, *m/z*): calcd for  $\text{C}_{31}\text{H}_{26}\text{O}_2\text{P}_2\text{S}_2$  [ $\text{M}+\text{H}$ ] $^+$ : 557.0922 found: 557.0914.

*O,O'*-([1,1'-biphenyl]-2,5-diyl) bis(diphenylphosphinothioate) (**3k'**)

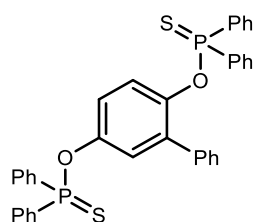

Synthesized by method A using diphenylphosphane (135  $\mu\text{L}$ , 0.7 mmol) and [1,1'-biphenyl]-2,5-diol (46.5 mg, 0.25 mmol), followed by further purification to obtained a white solid (139.1 mg, yield 90%).

$^1\text{H}$  NMR (400 MHz, Chloroform-*d*)  $\delta$  7.98 – 7.86 (m, 4H), 7.67 – 7.56 (m, 4H), 7.53 – 7.46 (m, 2H), 7.46 – 7.36 (m, 6H), 7.33 – 7.21 (m, 9H), 7.20 – 7.15 (m, 1H), 7.05 – 7.00 (m, 1H), 6.87 – 6.79 (m, 1H).

$^{13}\text{C}$  NMR (101 MHz, Chloroform-*d*)  $\delta$  146.73 (dd,  $J = 8.8, 1.7$  Hz), 144.69 (dd,  $J = 8.8, 1.9$  Hz), 136.85, 135.70 (d,  $J = 5.1$  Hz), 134.51 (d,  $J = 5.1$  Hz), 133.41 (d,  $J = 5.3$  Hz), 132.07 (d,  $J = 3.0$  Hz), 131.79 (d,  $J = 3.1$  Hz), 131.22 (d,  $J = 24.3$  Hz), 131.22 (d,  $J = 1.3$  Hz), 129.61, 128.45 (d,  $J = 13.6$  Hz), 128.20 (d,  $J = 13.8$  Hz), 127.90, 127.36, 124.22 (d,  $J = 5.0$  Hz), 122.01 (d,  $J = 4.8$  Hz), 120.80 (d,  $J = 4.6$  Hz).

$^{31}\text{P}$  NMR (162 MHz, Chloroform-*d*)  $\delta$  82.86, 82.73.

HRMS (ESI, *m/z*): calcd for  $\text{C}_{36}\text{H}_{28}\text{O}_2\text{P}_2\text{S}_2$  [ $\text{M}+\text{H}$ ] $^+$ : 619.1079 found: 619.1058.

*O,O'*-(naphthalene-1,3-diyl) bis(diphenylphosphinothioate) (**3l'**)

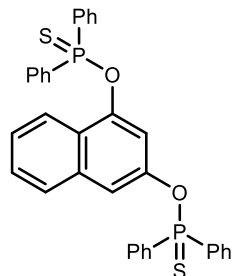

Synthesized by method A using diphenylphosphane (135  $\mu\text{L}$ , 0.7 mmol) and naphthalene-1,3-diol (40.0 mg, 0.25 mmol), followed by further purification to obtained a white solid (106.6 mg, yield 72%).

$^1\text{H}$  NMR (400 MHz, Chloroform-*d*)  $\delta$  8.02 – 7.84 (m, 9H), 7.60 (d,  $J = 8.1$  Hz, 1H), 7.52 – 7.36 (m, 13H), 7.36 – 7.28 (m, 2H), 7.10 (d,  $J = 2.2$  Hz, 1H).

$^{13}\text{C}$  NMR (101 MHz, Chloroform-*d*)  $\delta$  147.29 (d,  $J = 9.2$  Hz), 147.16 (dd,  $J = 8.9, 1.6$  Hz), 134.50

(d,  $J = 15.1$  Hz), 134.02 (d,  $J = 1.4$  Hz), 133.40 (d,  $J = 15.0$  Hz), 132.13 (d,  $J = 3.1$  Hz), 132.00 (d,  $J = 3.1$  Hz), 131.27 (d,  $J = 10.3$  Hz), 131.16 (d,  $J = 10.6$  Hz), 128.59 (d,  $J = 13.9$  Hz), 128.44 (d,  $J = 13.9$  Hz), 127.41, 127.10, 125.37, 125.07 (d,  $J = 4.6$  Hz), 122.04, 115.03 (d,  $J = 5.6$  Hz), 112.71 – 111.84 (m).

$^{31}\text{P}$  NMR (162 MHz, Chloroform-*d*)  $\delta$  82.94, 82.65.

HRMS (ESI,  $m/z$ ): calcd for  $\text{C}_{34}\text{H}_{26}\text{O}_2\text{P}_2\text{S}_2$   $[\text{M}+\text{H}]^+$ : 593.0922 found: 593.0910.

*O,O'*-(naphthalene-2,3-diyl) bis(diphenylphosphinothioate) (**3m'**)

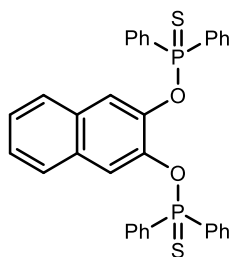

Synthesized by method A using diphenylphosphane (135  $\mu\text{L}$ , 0.7 mmol) and naphthalene-2,3-diol (40.0 mg, 0.25 mmol), followed by further purification to obtained a white solid (115.4 mg, yield 78%).

$^1\text{H}$  NMR (400 MHz, Chloroform-*d*)  $\delta$  8.06 – 7.93 (m, 8H), 7.52 – 7.44 (m, 8H), 7.38 – 7.31 (m, 8H), 7.31 – 7.27 (m, 2H).

$^{13}\text{C}$  NMR (101 MHz, Chloroform-*d*)  $\delta$  141.46 (dd,  $J = 8.5, 5.5$  Hz), 133.95 (d,  $J = 110.9$  Hz), 132.05 (d,  $J = 3.0$  Hz), 131.52 (d,  $J = 11.8$  Hz), 130.11, 128.48 (d,  $J = 13.7$  Hz), 127.18, 125.65, 118.88 (d,  $J = 6.1$  Hz).

$^{31}\text{P}$  NMR (162 MHz, Chloroform-*d*)  $\delta$  83.21.

HRMS (ESI,  $m/z$ ): calcd for  $\text{C}_{34}\text{H}_{26}\text{O}_2\text{P}_2\text{S}_2$   $[\text{M}+\text{H}]^+$ : 593.0922 found: 593.0908.

*O,O'*-(naphthalene-1,4-diyl) bis(diphenylphosphinothioate) (**3n'**)

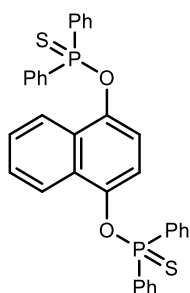

Synthesized by method A using diphenylphosphane (135  $\mu\text{L}$ , 0.7 mmol) and naphthalene-1,4-diol (40.0 mg, 0.25 mmol), followed by further purification to obtained a white solid (127.3 mg, yield 86%).

$^1\text{H}$  NMR (400 MHz, Chloroform-*d*)  $\delta$  8.08 – 7.96 (m, 10H), 7.53 – 7.38 (m, 14H), 6.88 (s, 2H).

$^{13}\text{C}$  NMR (101 MHz, Chloroform-*d*)  $\delta$  143.41 (dd,  $J = 9.3, 1.9$  Hz), 134.34 (d,  $J = 110.9$  Hz), 132.14, 132.11, 131.19 (d,  $J = 11.8$  Hz), 128.59 (d,  $J = 13.7$  Hz), 126.64, 122.28, 115.45 – 114.27 (m).

$^{31}\text{P}$  NMR (162 MHz, Chloroform-*d*)  $\delta$  82.28.

HRMS (ESI,  $m/z$ ): calcd for  $\text{C}_{34}\text{H}_{26}\text{O}_2\text{P}_2\text{S}_2$   $[\text{M}+\text{H}]^+$ : 593.0922 found: 593.0907.

*O,O'*-([1,1'-biphenyl]-2,2'-diyl) bis(diphenylphosphinothioate) (**3o'**)

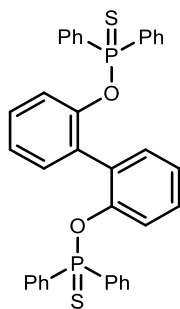

Synthesized by method A using diphenylphosphane (135  $\mu$ L, 0.7 mmol) and [1,1'-biphenyl]-2,2'-diol (46.5 mg, 0.25 mmol), followed by further purification to obtained a white solid (115.9 mg, yield 75%).  
 $^1\text{H}$  NMR (400 MHz, Chloroform-*d*)  $\delta$  7.70 – 7.50 (m, 6H), 7.38 – 7.30 (m, 6H), 7.26 – 7.13 (m, 12H), 7.03 (t,  $J = 7.4$  Hz, 2H).

$^{13}\text{C}$  NMR (101 MHz, Chloroform-*d*)  $\delta$  148.62 (d,  $J = 8.5$  Hz), 134.25 (d,  $J = 111.4$  Hz), 131.71, 131.60 (d,  $J = 3.1$  Hz), 131.02 (d,  $J = 11.7$  Hz), 130.64 (d,  $J = 5.7$  Hz), 128.40, 128.17 (d,  $J = 13.6$  Hz), 124.22, 120.53 (d,  $J = 5.2$  Hz).

$^{31}\text{P}$  NMR (162 MHz, Chloroform-*d*)  $\delta$  81.05.

HRMS (ESI, *m/z*): calcd for  $\text{C}_{36}\text{H}_{28}\text{O}_2\text{P}_2\text{S}_2$   $[\text{M}+\text{H}]^+$ : 619.1079 found: 619.1064.

*O,O'*-([1,1'-binaphthalene]-2,2'-diyl) bis(diphenylphosphinothioate) (**3p'**)

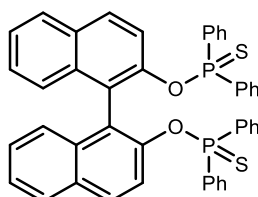

Synthesized by method A using diphenylphosphane (135  $\mu$ L, 0.7 mmol) and [1,1'-binaphthalene]-2,2'-diol (71.5 mg, 0.25 mmol), followed by further purification to obtained a white solid (93.3 mg, yield 52%).

$^1\text{H}$  NMR (400 MHz, Chloroform-*d*)  $\delta$  7.83 – 7.76 (m, 4H), 7.72 – 7.66 (m, 2H), 7.58 – 7.48 (m, 4H), 7.37 – 7.25 (m, 8H), 7.25 – 7.17 (m, 6H), 7.16 – 7.08 (m, 4H), 7.07 – 7.00 (m, 4H).

$^{13}\text{C}$  NMR (101 MHz, Chloroform-*d*)  $\delta$  147.38 (d,  $J = 8.4$  Hz), 134.94 (d,  $J = 52.2$  Hz), 133.83 (d,  $J = 50.5$  Hz), 133.65, 131.45 (dd,  $J = 14.3, 3.0$  Hz), 130.97 (d,  $J = 11.7$  Hz), 130.67 (d,  $J = 11.9$  Hz), 130.56, 129.06, 128.05 (dd,  $J = 29.7, 13.9$  Hz), 126.75, 125.66 (d,  $J = 110.1$  Hz), 123.04 (d,  $J = 6.6$  Hz), 120.50 (d,  $J = 5.1$  Hz).

$^{31}\text{P}$  NMR (162 MHz, Chloroform-*d*)  $\delta$  80.06.

HRMS (ESI, *m/z*): calcd for  $\text{C}_{44}\text{H}_{32}\text{O}_2\text{P}_2\text{S}_2$   $[\text{M}+\text{H}]^+$ : 719.1392 found: 719.1374.

*O,O',O''*-(benzene-1,3,5-triyl) tris(diphenylphosphinothioate) (**3q'**)

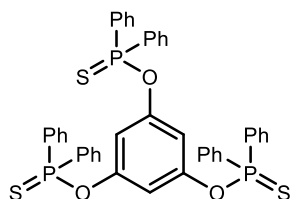

Synthesized by method B using diphenylphosphane (190  $\mu$ L, 1.0 mmol) and benzene-1,3,5-triol (31.5 mg, 0.25 mmol), followed by further purification to obtained a white solid (129.6 mg, yield 67%).

$^1\text{H}$  NMR (400 MHz, Chloroform-*d*)  $\delta$  7.87 – 7.77 (m, 12H), 7.53 – 7.46 (m, 6H), 7.46 – 7.37 (m, 12H), 6.71 (q,  $J = 1.3$  Hz, 3H).

$^{13}\text{C}$  NMR (101 MHz, Chloroform-*d*)  $\delta$  150.82 (d,  $J = 8.6$  Hz), 133.65 (d,  $J = 110.8$  Hz), 132.09 (d,  $J = 3.1$  Hz), 131.27 (d,  $J = 11.7$  Hz), 128.50 (d,  $J = 13.7$  Hz), 112.23 (d,  $J = 6.1$  Hz).

$^{31}\text{P}$  NMR (162 MHz, Chloroform-*d*)  $\delta$  83.12.

HRMS (ESI, *m/z*): calcd for  $\text{C}_{42}\text{H}_{33}\text{O}_3\text{P}_3\text{S}_3$   $[\text{M}+\text{H}]^+$ : 775.0877 found: 775.0865

*O,O',O''*-(benzene-1,2,4-triyl) tris(diphenylphosphinothioate) (**3r'**)

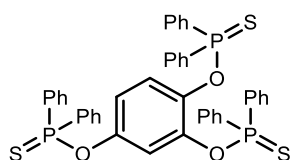

Synthesized by method B using diphenylphosphane (190  $\mu\text{L}$ , 1.0 mmol) and benzene-1,2,4-triol (31.5 mg, 0.25 mmol), followed by further purification to obtained a white solid (139.3 mg, yield 72%).

$^1\text{H}$  NMR (400 MHz, Chloroform-*d*)  $\delta$  7.91 – 7.76 (m, 12H), 7.52 – 7.37 (m, 10H), 7.35 – 7.26 (m, 8H), 7.00 (d,  $J = 2.7$  Hz, 1H), 6.93 (d,  $J = 9.1$  Hz, 1H), 6.63 (d,  $J = 9.2, 2.0$  Hz, 1H).

$^{13}\text{C}$  NMR (101 MHz, Chloroform-*d*)  $\delta$  139.46, 134.45, 134.25 (d,  $J = 6.7$  Hz), 133.35, 133.15 (d,  $J = 6.6$  Hz), 132.05, 132.02, 131.99, 131.48, 131.36, 131.24, 128.53, 128.49, 128.40, 128.36, 121.56 (d,  $J = 5.3$  Hz), 117.56, 115.90.

$^{31}\text{P}$  NMR (162 MHz, Chloroform-*d*)  $\delta$  83.55, 83.13, 82.89.

HRMS (ESI, *m/z*): calcd for  $\text{C}_{42}\text{H}_{33}\text{O}_3\text{P}_3\text{S}_3$   $[\text{M}+\text{H}]^+$ : 775.0877 found: 775.0862

*O,O'*-(1,3-phenylene) bis(di-tert-butylphosphinothioate) (**3s'**)

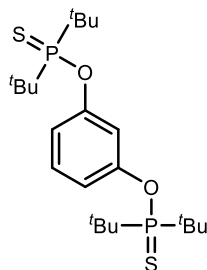

Synthesized by method A using Di-tert-butylphosphine (102.2 mg, 0.7 mmol) and resorcinol (27.5 mg, 0.25 mmol), followed by further purification to obtained a white solid (92.4 mg, yield 80%).

$^1\text{H}$  NMR (400 MHz, Chloroform-*d*)  $\delta$  7.34 (tt,  $J = 2.3, 1.1$  Hz, 1H), 7.20 (t,  $J = 8.2$  Hz, 1H), 7.06 – 6.99 (m, 2H), 1.43 (d, 36H).

$^{13}\text{C}$  NMR (101 MHz, Chloroform-*d*)  $\delta$  152.80 (d,  $J = 11.7$  Hz), 128.67, 117.23 (d,  $J = 4.1$  Hz), 115.46 (t,  $J = 4.0$  Hz), 41.20 (d,  $J = 58.4$  Hz), 27.45 (d,  $J = 1.3$  Hz).

$^{31}\text{P}$  NMR (162 MHz, Chloroform-*d*)  $\delta$  128.24.

HRMS (ESI, *m/z*): calcd for  $\text{C}_{22}\text{H}_{40}\text{O}_2\text{P}_2\text{S}_2$   $[\text{M}+\text{H}]^+$ : 463.2018 found: 463.2010

*O,O'*-(1,4-phenylene) bis(di-tert-butylphosphinothioate) (**3t'**)

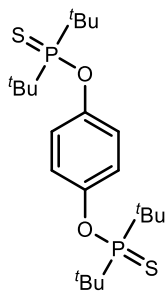

Synthesized by method A using Di-tert-butylphosphine (102.2 mg, 0.7 mmol) and hydroquinone (27.5 mg, 0.25 mmol), followed by further purification to obtained a white solid (101.6 mg, yield 88%).

$^1\text{H}$  NMR (400 MHz, Chloroform-*d*)  $\delta$  7.21 (s, 4H), 1.43 (d,  $J = 16.3$  Hz, 36H).

$^{13}\text{C}$  NMR (101 MHz, Chloroform-*d*)  $\delta$  148.74 (dd,  $J = 12.0, 1.5$  Hz), 126.65 – 116.12 (m), 41.10 (d,  $J = 58.6$  Hz), 27.43.

$^{31}\text{P}$  NMR (162 MHz, Chloroform-*d*)  $\delta$  127.71.

HRMS (ESI,  $m/z$ ): calcd for  $\text{C}_{22}\text{H}_{40}\text{O}_2\text{P}_2\text{S}_2$   $[\text{M}+\text{H}]^+$ : 463.2018 found: 463.2008

#### *O,O'*-(1,2-phenylene) bis(di-tert-butylphosphinothioate) (**3u'**)

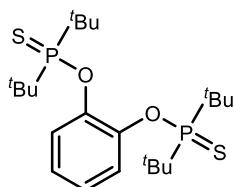

Synthesized by method A using Di-tert-butylphosphine (102.2 mg, 0.7 mmol) and pyrocatechol (27.5 mg, 0.25 mmol), followed by further purification to obtained a white solid (90.1 mg, yield 78%).

$^1\text{H}$  NMR (400 MHz, Chloroform-*d*)  $\delta$  8.18 – 8.09 (m, 2H), 7.02 – 6.93 (m, 2H), 1.44 (d,  $J = 16.5$  Hz, 36H).

$^{13}\text{C}$  NMR (101 MHz, Chloroform-*d*)  $\delta$  143.15 (dd,  $J = 11.0, 4.9$  Hz), 123.00 (d,  $J = 4.7$  Hz), 122.93, 41.58 (d,  $J = 57.7$  Hz), 27.54 (d,  $J = 1.2$  Hz).

$^{31}\text{P}$  NMR (162 MHz, Chloroform-*d*)  $\delta$  131.37.

HRMS (ESI,  $m/z$ ): calcd for  $\text{C}_{22}\text{H}_{40}\text{O}_2\text{P}_2\text{S}_2$   $[\text{M}+\text{H}]^+$ : 463.2018 found: 463.2007

#### *O*-phenyl diphenylphosphinothioate (**3v'**) <sup>[1]</sup>

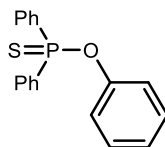

Synthesized by method C using diphenylphosphane (89  $\mu\text{L}$ , 0.5 mmol) and phenol (94 mg, 1.0 mmol), followed by further purification to obtained a yellow solid (147.3 mg, yield 95%).

$^1\text{H}$  NMR (400 MHz, Chloroform-*d*)  $\delta$  7.97 (dd,  $J = 13.8, 7.5$  Hz, 4H), 7.45 (ddd,  $J = 17.5, 8.8, 4.1$  Hz, 6H), 7.20 (t,  $J = 7.7$  Hz, 2H), 7.06 (d,  $J = 9.4$  Hz, 2H), 7.04 – 6.98 (m, 1H).

$^{13}\text{C}$  NMR (101 MHz, Chloroform-*d*)  $\delta$  150.38, 134.21 (d,  $J = 111.0$  Hz), 131.97 (d,  $J = 3.1$  Hz), 131.27 (d,  $J = 11.5$  Hz), 129.22 (d,  $J = 1.3$  Hz), 128.39 (d,  $J = 13.6$  Hz), 124.72 (d,  $J = 1.8$  Hz), 121.60 (d,  $J = 4.9$  Hz).

$^{31}\text{P}$  NMR (162 MHz, Chloroform-*d*)  $\delta$  82.03.

*O*-(4-chlorophenyl) diphenylphosphinothioate (**3w'**)

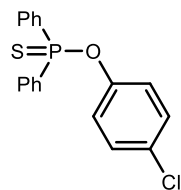

Synthesized by method C using diphenylphosphane (89  $\mu$ L, 0.5 mmol) and 4-chlorophenol (128 mg, 1.0 mmol), followed by further purification to obtained a yellow solid (165.1 mg, yield 96%).

$^1\text{H}$  NMR (400 MHz, Chloroform-*d*)  $\delta$  8.00 – 7.90 (m, 4H), 7.58 – 7.42 (m, 6H), 7.22 – 7.14 (m, 2H), 7.00 – 6.92 (m, 2H).

$^{13}\text{C}$  NMR (101 MHz, Chloroform-*d*)  $\delta$  148.96 (d,  $J = 8.8$  Hz), 133.87 (d,  $J = 110.9$  Hz), 132.22 (d,  $J = 3.1$  Hz), 131.35 (d,  $J = 11.6$  Hz), 130.22 (d,  $J = 2.2$  Hz), 129.32 (d,  $J = 1.4$  Hz), 128.54 (d,  $J = 13.6$  Hz), 123.06 (d,  $J = 4.8$  Hz).

$^{31}\text{P}$  NMR (162 MHz, Chloroform-*d*)  $\delta$  83.15.

HRMS (ESI,  $m/z$ ): calcd for  $\text{C}_{18}\text{H}_{14}\text{ClOPS}$   $[\text{M}+\text{H}]^+$ : 345.0264 found: 345.0261.

*O*-(4-fluorophenyl) diphenylphosphinothioate (**3x'**)

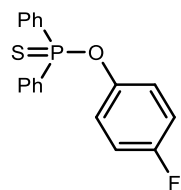

Synthesized by method C using diphenylphosphane (89  $\mu$ L, 0.5 mmol) and 4-fluorophenol (112 mg, 1.0 mmol), followed by further purification to obtained a yellow solid (139.4 mg, yield 85%).

$^1\text{H}$  NMR (400 MHz, Chloroform-*d*)  $\delta$  7.62 – 7.51 (m, 4H), 7.44 – 7.36 (m, 2H), 7.34 (t,  $J = 3.2$  Hz, 6H), 6.90 (t,  $J = 8.7$  Hz, 2H).

$^{13}\text{C}$  NMR (101 MHz, Chloroform-*d*)  $\delta$  162.22 (dd,  $J = 247.2, 2.0$  Hz), 137.18 (d,  $J = 23.8$  Hz), 134.21 (d,  $J = 6.7$  Hz), 134.13 (d,  $J = 6.7$  Hz), 132.65 (d,  $J = 20.9$  Hz), 129.37, 128.57 (d,  $J = 6.5$  Hz), 116.01 (d,  $J = 22.0$  Hz).

$^{19}\text{F}$  NMR (377 MHz, Chloroform-*d*)  $\delta$  -114.39 (d,  $J = 3.0$  Hz).

$^{31}\text{P}$  NMR (162 MHz, Chloroform-*d*)  $\delta$  35.87 (d,  $J = 2.9$  Hz).

HRMS (ESI,  $m/z$ ): calcd for  $\text{C}_{18}\text{H}_{14}\text{FOPS}$   $[\text{M}+\text{H}]^+$ : 329.0552 found: 329.0560.

*O*-([1,1'-biphenyl]-4-yl) diphenylphosphinothioate (**3y'**)

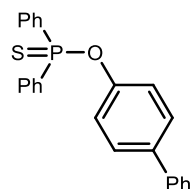

Synthesized by method C using diphenylphosphane (89  $\mu$ L, 0.5 mmol) and [1,1'-biphenyl]-4-ol (170 mg, 1.0 mmol), followed by further purification to obtained a yellow solid (179.5 mg, yield 93%).

$^1\text{H}$  NMR (400 MHz, Chloroform-*d*)  $\delta$  8.04 – 7.94 (m, 4H), 7.51 – 7.39 (m, 10H), 7.39 – 7.31 (m, 2H), 7.31 – 7.25 (m, 1H), 7.13 – 7.07 (m, 2H).

$^{13}\text{C}$  NMR (101 MHz, Chloroform-*d*)  $\delta$  149.91 (d,  $J = 8.8$  Hz), 140.12, 137.74 (d,  $J = 1.8$  Hz), 134.19 (d,  $J = 110.9$  Hz), 132.05 (d,  $J = 3.1$  Hz), 131.32 (d,  $J = 11.6$  Hz), 128.58 (d,  $J = 11.4$  Hz), 128.39, 127.91 (d,  $J = 1.4$  Hz), 127.10, 126.84, 121.87 (d,  $J = 5.0$  Hz).

$^{31}\text{P}$  NMR (162 MHz, Chloroform-*d*)  $\delta$  82.28.

HRMS (ESI, *m/z*): calcd for  $\text{C}_{24}\text{H}_{19}\text{OPS}$   $[\text{M}+\text{H}]^+$ : 387.0967 found: 387.0967.

#### *O*-(4-methoxyphenyl) diphenylphosphinothioate (**3z'**)<sup>[1]</sup>

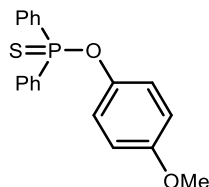

Synthesized by method C using diphenylphosphane (89  $\mu\text{L}$ , 0.5 mmol) and 4-methoxyphenol (124 mg, 1.0 mmol), followed by further purification to obtained a yellow solid (159.8 mg, yield 94%).

$^1\text{H}$  NMR (400 MHz, Chloroform-*d*)  $\delta$  8.03 – 7.90 (m, 4H), 7.53 – 7.37 (m, 6H), 6.98 – 6.85 (m, 2H), 6.77 – 6.63 (m, 2H), 3.70 – 3.62 (m, 3H).

$^{13}\text{C}$  NMR (101 MHz, Chloroform-*d*)  $\delta$  156.45 (d,  $J = 1.8$  Hz), 143.76 (d,  $J = 9.0$  Hz), 134.18 (d,  $J = 110.8$  Hz), 131.94 (d,  $J = 3.0$  Hz), 131.29 (d,  $J = 11.4$  Hz), 128.35 (d,  $J = 13.5$  Hz), 122.47 (d,  $J = 4.6$  Hz), 114.18 (d,  $J = 1.6$  Hz), 55.34.

$^{31}\text{P}$  NMR (162 MHz, Chloroform-*d*)  $\delta$  36.38.

#### *O*-(4-phenoxyphenyl) diphenylphosphinothioate (**3aa'**)

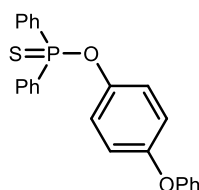

Synthesized by method C using diphenylphosphane (89  $\mu\text{L}$ , 0.5 mmol) and 4-phenoxyphenol (186 mg, 1.0 mmol), followed by further purification to obtained a white solid (174.9 mg, yield 87%).

$^1\text{H}$  NMR (400 MHz, Chloroform-*d*)  $\delta$  7.94 – 7.83 (m, 4H), 7.48 – 7.33 (m, 6H), 7.29 – 7.21 (m, 2H), 6.99 – 6.91 (m, 1H), 6.91 – 6.81 (m, 2H), 4.40 – 4.31 (m, 2H), 4.22 – 4.14 (m, 2H).

$^1\text{H}$  NMR (400 MHz, Chloroform-*d*)  $\delta$  8.04 – 7.93 (m, 4H), 7.54 – 7.39 (m, 6H), 7.22 – 7.15 (m, 1H), 7.07 – 6.88 (m, 3H), 6.00 – 5.85 (m, 1H), 5.06 – 4.92 (m, 2H), 3.44 – 3.37 (m, 2H).

$^{13}\text{C}$  NMR (101 MHz, Chloroform-*d*)  $\delta$  158.54, 134.38 (d,  $J = 110.5$  Hz), 131.99 (d,  $J = 3.0$  Hz), 131.31 (d,  $J = 11.4$  Hz), 129.60, 128.52 (d,  $J = 13.5$  Hz), 121.22, 114.73.

$^{31}\text{P}$  NMR (162 MHz, Chloroform-*d*)  $\delta$  82.89.

HRMS (ESI, *m/z*): calcd for  $\text{C}_{24}\text{H}_{19}\text{O}_2\text{PS}$   $[\text{M}+\text{H}]^+$ : 403.0916 found: 403.0912.

#### *O*-(4-acetamidophenyl) diphenylphosphinothioate (**3ab'**)

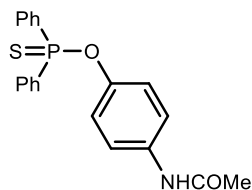

Synthesized by method C using diphenylphosphane (89  $\mu\text{L}$ , 0.5 mmol) and N-(4-hydroxyphenyl)acetamide (151 mg, 1.0 mmol), followed by further purification to obtained a white solid (143.1 mg, yield 78%).

$^1\text{H}$  NMR (400 MHz, Chloroform-*d*)  $\delta$  8.02 – 7.89 (m, 5H), 7.54 – 7.40 (m, 6H), 7.35 – 7.28 (m, 2H), 6.94 – 6.87 (m, 2H), 2.03 – 1.97 (m, 3H).

$^{13}\text{C}$  NMR (101 MHz, Chloroform-*d*)  $\delta$  168.65, 146.38 (d,  $J = 8.9$  Hz), 134.99 – 134.37 (m), 133.34, 132.11 (d,  $J = 3.0$  Hz), 131.25 (d,  $J = 11.6$  Hz), 128.45 (d,  $J = 13.6$  Hz), 121.82 (d,  $J = 4.8$  Hz), 120.85 (d,  $J = 1.4$  Hz), 24.14.

$^{31}\text{P}$  NMR (162 MHz, Chloroform-*d*)  $\delta$  82.62.

HRMS (ESI,  $m/z$ ): calcd for  $\text{C}_{20}\text{H}_{18}\text{NO}_2\text{PS}$   $[\text{M}+\text{H}]^+$ : 368.0869 found: 368.0857.

#### *O*-(4-cyanophenyl) diphenylphosphinothioate (**3ac'**)

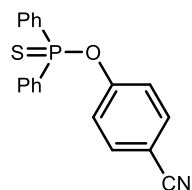

Synthesized by method C using diphenylphosphane (89  $\mu\text{L}$ , 0.5 mmol) and 4-hydroxybenzonitrile (119 mg, 1.0 mmol), followed by further purification to obtained a yellow liquid (157.5 mg, yield 94%).

$^1\text{H}$  NMR (400 MHz,  $\text{CDCl}_3$ )  $\delta$  8.01 – 7.90 (m, 4H), 7.58 – 7.44 (m, 8H), 7.20 – 7.11 (m, 2H).

$^{13}\text{C}$  NMR (101 MHz,  $\text{CDCl}_3$ )  $\delta$  153.87 (d,  $J = 8.5$  Hz), 133.47,  $\delta$  133.23 (d,  $J = 110.8$  Hz), 132.39 (d,  $J = 3.1$  Hz), 131.13 (d,  $J = 11.7$  Hz), 128.58 (d,  $J = 13.7$  Hz), 122.50 (d,  $J = 5.4$  Hz), 118.16, 108.36 (d,  $J = 1.6$  Hz).

$^{31}\text{P}$  NMR (162 MHz,  $\text{CDCl}_3$ )  $\delta$  83.87.

HRMS (ESI,  $m/z$ ): calcd for  $\text{C}_{19}\text{H}_{14}\text{NOPS}$   $[\text{M}+\text{H}]^+$ : 336.0607 found: 336.0602.

#### *O*-(4-(trifluoromethyl)phenyl) diphenylphosphinothioate (**3ad'**)

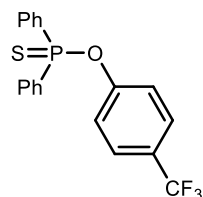

Synthesized by method C using diphenylphosphane (89  $\mu\text{L}$ , 0.5 mmol) and 4-(trifluoromethyl)phenol (162 mg, 1.0 mmol), followed by further purification to obtained a white solid (181.4 mg, yield 96%).

$^1\text{H}$  NMR (400 MHz, Chloroform-*d*)  $\delta$  8.04 – 7.88 (m, 4H), 7.56 – 7.45 (m, 8H), 7.19 – 7.13 (m, 2H).

$^{13}\text{C}$  NMR (101 MHz, Chloroform-*d*)  $\delta$  153.12 (d,  $J = 8.4$  Hz), 133.72 (d,  $J = 111.1$  Hz), 132.34 (d,  $J = 3.0$  Hz), 131.31 (d,  $J = 11.7$  Hz), 128.62 (d,  $J = 13.7$  Hz), 126.65 (t,  $J = 3.7$  Hz), 121.98 (d,  $J = 5.1$  Hz).

$^{31}\text{P}$  NMR (162 MHz, Chloroform-*d*)  $\delta$  83.26.

$^{19}\text{F}$  NMR (377 MHz, Chloroform-*d*)  $\delta$  -62.02.

HRMS (ESI,  $m/z$ ): calcd for  $\text{C}_{19}\text{H}_{14}\text{F}_3\text{OPS}$   $[\text{M}+\text{H}]^+$ : 379.0528 found: 379.0524.

#### *O*-(3-bromophenyl) diphenylphosphinothioate (**3ae'**) <sup>[2]</sup>

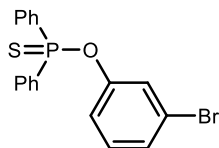

Synthesized by method C using diphenylphosphane (89  $\mu$ L, 0.5 mmol) and 3-bromophenol (171 mg, 1.0 mmol), followed by further purification to obtained a white solid (189.6 mg, yield 98%).

$^1\text{H}$  NMR (400 MHz, Chloroform-*d*)  $\delta$  8.01 – 7.85 (m, 4H), 7.55 – 7.39 (m, 6H), 7.26 – 7.17 (m, 2H), 7.09 – 7.01 (m, 1H), 7.01 – 6.94 (m, 1H).

$^{13}\text{C}$  NMR (101 MHz, Chloroform-*d*)  $\delta$  150.92 (d,  $J = 8.6$  Hz), 133.75 (d,  $J = 111.0$  Hz), 132.20 (d,  $J = 3.1$  Hz), 131.22 (d,  $J = 11.7$  Hz), 130.20 (d,  $J = 1.3$  Hz), 128.49 (d,  $J = 13.8$  Hz), 127.93 (d,  $J = 1.7$  Hz), 125.08 (d,  $J = 5.1$  Hz), 122.15 (d,  $J = 1.4$  Hz), 120.39 (d,  $J = 4.9$  Hz).

$^{31}\text{P}$  NMR (162 MHz, Chloroform-*d*)  $\delta$  83.26.

#### *O*-(2-allylphenyl) diphenylphosphinothioate (**3af'**)

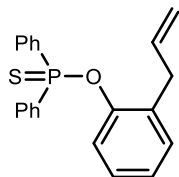

Synthesized by method C using diphenylphosphane (89  $\mu$ L, 0.5 mmol) and 2-allylphenol (134 mg, 1.0 mmol), followed by further purification to obtained a white solid (159.3 mg, yield 91%).

$^{13}\text{C}$  NMR (101 MHz, Chloroform-*d*)  $\delta$  148.91 (d,  $J = 8.8$  Hz), 136.05, 134.68 (d,  $J = 111.1$  Hz), 131.95 (d,  $J = 3.1$  Hz), 131.12 (d,  $J = 11.6$  Hz), 130.47, 128.45 (d,  $J = 13.6$  Hz), 126.91 (d,  $J = 1.3$  Hz), 124.63 (d,  $J = 1.5$  Hz), 120.62 (d,  $J = 5.1$  Hz), 116.05, 34.72.

$^{31}\text{P}$  NMR (162 MHz, Chloroform-*d*)  $\delta$  81.01.

HRMS (ESI,  $m/z$ ): calcd for  $\text{C}_{21}\text{H}_{19}\text{OPS}$  [ $\text{M}+\text{H}$ ] $^+$ : 351.0969 found: 351.0961.

#### *O*-(4-chloro-3-methylphenyl) diphenylphosphinothioate (**3ag'**)

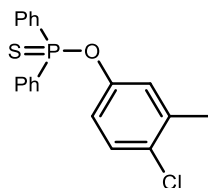

Synthesized by method C using diphenylphosphane (89  $\mu$ L, 0.5 mmol) and 4-chloro-3-methylphenol (142 mg, 1.0 mmol), followed by further purification to obtained a white solid (162.9 mg, yield 91%).

$^1\text{H}$  NMR (400 MHz, Chloroform-*d*)  $\delta$  8.00 – 7.90 (m, 4H), 7.54 – 7.39 (m, 6H), 7.17 – 7.11 (m, 1H), 6.96 – 6.91 (m, 1H), 6.81 – 6.74 (m, 1H), 2.26 – 2.21 (m, 3H).

$^{13}\text{C}$  NMR (101 MHz, Chloroform-*d*)  $\delta$  148.72 (d,  $J = 8.8$  Hz), 137.14 (d,  $J = 1.4$  Hz), 133.97 (d,  $J = 111.0$  Hz), 132.10 (d,  $J = 3.1$  Hz), 131.25 (d,  $J = 11.5$  Hz), 130.30 (d,  $J = 2.1$  Hz), 129.42 (d,  $J = 1.4$  Hz), 128.44 (d,  $J = 13.6$  Hz), 124.07 (d,  $J = 4.9$  Hz), 120.21 (d,  $J = 4.8$  Hz), 20.08.

$^{31}\text{P}$  NMR (162 MHz, Chloroform-*d*)  $\delta$  82.74.

HRMS (ESI,  $m/z$ ): calcd for  $\text{C}_{19}\text{H}_{16}\text{ClOPS}$  [ $\text{M}+\text{H}$ ] $^+$ : 359.0421 found: 359.0418.

#### *O*-(3,5-dibromophenyl) diphenylphosphinothioate (**3ah'**)

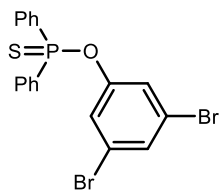

Synthesized by method C using diphenylphosphane (89  $\mu$ L, 0.5 mmol) and 3,5-dibromophenol (245 mg, 1.0 mmol), followed by further purification to obtained a white solid (210.2 mg, yield 90%).

$^1\text{H}$  NMR (400 MHz, Chloroform-*d*)  $\delta$  7.98 – 7.88 (m, 4H), 7.57 – 7.37 (m, 7H), 7.22 – 7.12 (m, 2H).  
 $^{13}\text{C}$  NMR (101 MHz, Chloroform-*d*)  $\delta$  151.19 (d,  $J$  = 8.8 Hz), 133.35 (d,  $J$  = 110.8 Hz), 132.39 (d,  $J$  = 3.1 Hz), 131.19 (d,  $J$  = 11.7 Hz), 130.64 (d,  $J$  = 1.6 Hz), 128.58 (d,  $J$  = 13.7 Hz), 124.03 (d,  $J$  = 4.9 Hz), 122.49 (d,  $J$  = 1.6 Hz).

$^{31}\text{P}$  NMR (162 MHz, Chloroform-*d*)  $\delta$  84.51.

HRMS (ESI,  $m/z$ ): calcd for  $\text{C}_{18}\text{H}_{13}\text{Br}_2\text{OPS}$   $[\text{M}+\text{H}]^+$ : 468.8844 found: 468.8829.

#### *O*-(naphthalen-2-yl) diphenylphosphinothioate (**3ai'**)

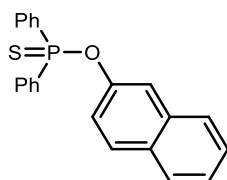

Synthesized by method C using diphenylphosphane (89  $\mu$ L, 0.5 mmol) and naphthalen-2-ol (144 mg, 1.0 mmol), followed by further purification to obtained a yellow solid (158.4 mg, yield 88%).

$^1\text{H}$  NMR (400 MHz, Chloroform-*d*)  $\delta$  8.19 – 8.09 (m, 4H), 7.88 – 7.81 (m, 1H), 7.80 (d,  $J$  = 9.0 Hz, 1H), 7.78 – 7.72 (m, 1H), 7.65 – 7.51 (m, 7H), 7.51 – 7.43 (m, 2H), 7.37 – 7.30 (m, 1H).

$^{13}\text{C}$  NMR (101 MHz, Chloroform-*d*)  $\delta$  148.12 (d,  $J$  = 9.0 Hz), 134.18 (d,  $J$  = 111.0 Hz), 133.59 (d,  $J$  = 1.4 Hz), 132.03 (d,  $J$  = 3.0 Hz), 131.31 (d,  $J$  = 11.5 Hz), 130.70 (d,  $J$  = 1.3 Hz), 129.24, 128.43 (d,  $J$  = 13.6 Hz), 127.54, 127.36, 126.34, 125.21, 121.51 (d,  $J$  = 4.5 Hz), 118.26 (d,  $J$  = 5.6 Hz).

$^{31}\text{P}$  NMR (162 MHz, Chloroform-*d*)  $\delta$  82.44.

HRMS (ESI,  $m/z$ ): calcd for  $\text{C}_{22}\text{H}_{17}\text{OPS}$   $[\text{M}+\text{H}]^+$ : 361.0811 found: 361.0802.

#### *O*-ethyl diphenylphosphinothioate (**3aj'**)

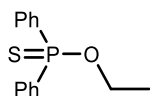

Synthesized by method D using diphenylphosphane (89  $\mu$ L, 0.5 mmol) and ethanol (46 mg, 1.0 mmol), followed by further purification to obtained a colorless liquid (127.1 mg, yield 97%).

$^1\text{H}$  NMR (400 MHz, Chloroform-*d*)  $\delta$  7.93 – 7.83 (m, 4H), 7.50 – 7.36 (m, 6H), 4.15 – 4.03 (m, 2H), 1.33 (t,  $J$  = 7.1 Hz, 3H).

$^{13}\text{C}$  NMR (101 MHz, Chloroform-*d*)  $\delta$  134.55 (d,  $J$  = 110.4 Hz), 131.62 (d,  $J$  = 3.0 Hz), 130.98 (d,  $J$  = 11.3 Hz), 128.26 (d,  $J$  = 13.4 Hz), 60.98 (d,  $J$  = 5.6 Hz), 16.10 (d,  $J$  = 8.0 Hz).

$^{31}\text{P}$  NMR (162 MHz, Chloroform-*d*)  $\delta$  81.02.

HRMS (ESI,  $m/z$ ): calcd for  $\text{C}_{14}\text{H}_{15}\text{OPS}$   $[\text{M}+\text{H}]^+$ : 263.0654 found: 263.0649.

#### *O*-butyl diphenylphosphinothioate (**3ak'**)

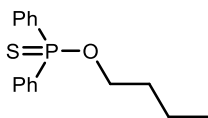

Synthesized by method D using diphenylphosphane (89  $\mu$ L, 0.5 mmol) and butan-1-ol (74 mg, 1.0 mmol), followed by further purification to obtained a colorless liquid (123.1 mg, yield 83%).

$^1\text{H}$  NMR (400 MHz, Chloroform-*d*)  $\delta$  7.93 – 7.82 (m, 4H), 7.52 – 7.38 (m, 6H), 4.07 – 3.97 (m, 2H), 1.76 – 1.64 (m, 2H), 1.50 – 1.36 (m, 2H), 0.95 – 0.87 (m, 3H).

$^{13}\text{C}$  NMR (101 MHz, Chloroform-*d*)  $\delta$  134.64 (d,  $J = 110.4$  Hz), 131.68 (d,  $J = 3.0$  Hz), 131.10 (d,  $J = 11.3$  Hz), 128.33 (d,  $J = 13.3$  Hz), 64.63 (d,  $J = 6.0$  Hz), 32.30 (d,  $J = 8.0$  Hz), 18.93, 13.62.

$^{31}\text{P}$  NMR (162 MHz, Chloroform-*d*)  $\delta$  80.90.

HRMS (ESI,  $m/z$ ): calcd for  $\text{C}_{16}\text{H}_{19}\text{OPS}$   $[\text{M}+\text{H}]^+$ : 291.0967 found: 291.0961.

*O*-(3,3-dimethylbutyl) diphenylphosphinothioate (**3al'**)

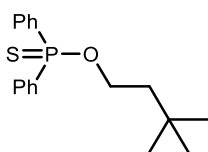

Synthesized by method D using diphenylphosphane (89  $\mu$ L, 0.5 mmol) and 3,3-dimethylbutan-1-ol (102 mg, 1.0 mmol), followed by further purification to obtained a colorless liquid (111.3 mg, yield 70%).

$^1\text{H}$  NMR (400 MHz, Chloroform-*d*)  $\delta$  7.93 – 7.82 (m, 4H), 7.56 – 7.33 (m, 6H), 4.16 – 4.00 (m, 2H), 1.92 – 1.38 (m, 2H), 0.97 – 0.86 (m, 9H).

$^{13}\text{C}$  NMR (101 MHz, Chloroform-*d*)  $\delta$  134.55 (d,  $J = 110.3$  Hz), 131.64 (d,  $J = 3.0$  Hz), 131.02 (d,  $J = 11.3$  Hz), 128.29 (d,  $J = 13.3$  Hz), 62.53 (d,  $J = 5.9$  Hz), 43.56 (d,  $J = 7.4$  Hz), 29.59.

$^{31}\text{P}$  NMR (162 MHz, Chloroform-*d*)  $\delta$  81.27.

HRMS (ESI,  $m/z$ ): calcd for  $\text{C}_{18}\text{H}_{23}\text{OPS}$   $[\text{M}+\text{H}]^+$ : 319.1280 found: 319.1272.

*O*-(cyclohexylmethyl) diphenylphosphinothioate (**3am'**)

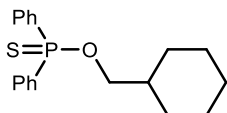

Synthesized by method D using diphenylphosphane (89  $\mu$ L, 0.5 mmol) and cyclohexylmethanol (114 mg, 1.0 mmol), followed by further purification to obtained a yellow liquid (102.3 mg, yield 62%).

$^1\text{H}$  NMR (400 MHz, Chloroform-*d*)  $\delta$  7.94 – 7.80 (m, 4H), 7.50 – 7.37 (m, 6H), 3.83 – 3.75 (m, 2H), 1.83 – 1.61 (m, 6H), 1.31 – 1.06 (m, 3H), 1.06 – 0.92 (m, 2H).

$^{13}\text{C}$  NMR (101 MHz, Chloroform-*d*)  $\delta$  134.70 (d,  $J = 110.3$  Hz), 131.77, 131.20 (d,  $J = 11.3$  Hz), 128.43 (d,  $J = 13.3$  Hz), 69.77 (d,  $J = 6.3$  Hz), 38.40 (d,  $J = 8.1$  Hz), 29.59, 26.42, 25.69.

$^{31}\text{P}$  NMR (162 MHz, Chloroform-*d*)  $\delta$  80.75.

HRMS (ESI,  $m/z$ ): calcd for  $\text{C}_{19}\text{H}_{23}\text{OPS}$   $[\text{M}+\text{H}]^+$ : 331.1280 found: 331.1279.

*O*-(4,4,4-trifluorobutyl) diphenylphosphinothioate (**3an'**) <sup>[1]</sup>

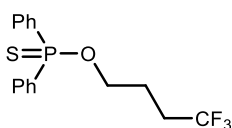

Synthesized by method D using diphenylphosphane (89  $\mu\text{L}$ , 0.5 mmol) and 4,4,4-trifluorobutan-1-ol (128 mg, 1.0 mmol), followed by further purification to obtained a yellow liquid (154.7 mg, yield 90%).  
 $^1\text{H}$  NMR (400 MHz, Chloroform-*d*)  $\delta$  7.91 – 7.81 (m, 4H), 7.53 – 7.39 (m, 6H), 4.12 – 4.02 (m, 2H), 2.29 – 2.15 (m, 2H), 2.02 – 1.92 (m, 2H).

$^{13}\text{C}$  NMR (101 MHz, Chloroform-*d*)  $\delta$  134.05 (d,  $J = 110.3$  Hz), 131.92 (d,  $J = 3.0$  Hz), 131.00 (d,  $J = 11.3$  Hz), 128.44 (d,  $J = 13.4$  Hz), 125.48, 62.91 (d,  $J = 5.3$  Hz), 30.49 (q,  $J = 29.3$  Hz), 23.06 (dt,  $J = 6.1, 2.9$  Hz).

$^{31}\text{P}$  NMR (162 MHz, Chloroform-*d*)  $\delta$  82.51.

$^{19}\text{F}$  NMR (377 MHz, Chloroform-*d*)  $\delta$  -66.27.

#### *O*-(2-phenoxyethyl) diphenylphosphinothioate (**3ao'**)

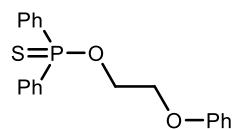

Synthesized by method D using diphenylphosphane (89  $\mu\text{L}$ , 0.5 mmol) and 2-phenoxyethan-1-ol (138 mg, 1.0 mmol), followed by further purification to obtained a white solid (145.3 mg, yield 87%).

$^1\text{H}$  NMR (400 MHz, Chloroform-*d*)  $\delta$  7.94 – 7.83 (m, 4H), 7.50 – 7.32 (m, 6H), 7.30 – 7.19 (m, 2H), 6.99 – 6.81 (m, 3H), 4.43 – 4.28 (m, 2H), 4.26 – 4.12 (m, 2H).

$^{13}\text{C}$  NMR (101 MHz, Chloroform-*d*)  $\delta$  158.30, 134.14 (d,  $J = 110.5$  Hz), 131.75 (d,  $J = 3.0$  Hz), 131.07 (d,  $J = 11.4$  Hz), 129.36, 128.28 (d,  $J = 13.5$  Hz), 120.98, 114.50, 66.76 (d,  $J = 8.4$  Hz), 63.14 (d,  $J = 5.4$  Hz).

$^{31}\text{P}$  NMR (162 MHz, Chloroform-*d*)  $\delta$  82.89.

HRMS (ESI,  $m/z$ ): calcd for  $\text{C}_{20}\text{H}_{19}\text{O}_2\text{PS}$   $[\text{M}+\text{H}]^+$ : 335.0916 found: 335.0911.

#### *O*-((tetrahydrofuran-2-yl)methyl) diphenylphosphinothioate (**3ap'**)

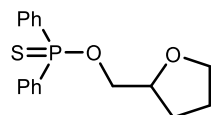

Synthesized by method D using diphenylphosphane (89  $\mu\text{L}$ , 0.5 mmol) and (tetrahydrofuran-2-yl)methanol (102 mg, 1.0 mmol), followed by further purification to obtained a white solid (116.1 mg, yield 73%).

$^1\text{H}$  NMR (400 MHz, Chloroform-*d*)  $\delta$  7.95 – 7.84 (m, 4H), 7.52 – 7.37 (m, 6H), 4.25 – 4.13 (m, 1H), 4.10 – 4.00 (m, 1H), 3.97 – 3.88 (m, 1H), 3.89 – 3.74 (m, 2H), 2.06 – 1.93 (m, 1H), 1.92 – 1.81 (m, 2H), 1.77 – 1.67 (m, 1H).

$^{13}\text{C}$  NMR (101 MHz, Chloroform-*d*)  $\delta$  134.26 (dd,  $J = 110.7, 12.5$  Hz), 131.74 (d,  $J = 3.1$  Hz), 131.14 (dd,  $J = 11.3, 6.7$  Hz), 128.33 (d,  $J = 13.3$  Hz), 77.38 (d,  $J = 9.0$  Hz), 68.40, 66.40 (d,  $J = 6.0$  Hz), 27.77, 25.60.

$^{31}\text{P}$  NMR (162 MHz, Chloroform-*d*)  $\delta$  82.54.

HRMS (ESI,  $m/z$ ): calcd for  $\text{C}_{17}\text{H}_{19}\text{O}_2\text{PS}$   $[\text{M}+\text{H}]^+$ : 319.0916 found: 319.0912.

#### *O*-(bicyclo[2.2.1]hept-5-en-2-ylmethyl) diphenylphosphinothioate (**3aq'**)

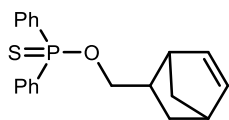

Synthesized by method D using diphenylphosphane (89  $\mu\text{L}$ , 0.5 mmol) and bicyclo[2.2.1]hept-5-en-2-ylmethanol (124 mg, 1.0 mmol), followed by further purification to obtained a white solid (135.9, yield 80%).

$^1\text{H}$  NMR (400 MHz, Chloroform-*d*)  $\delta$  8.00 – 7.84 (m, 4H), 7.55 – 7.40 (m, 6H), 4.22 – 4.09 (m, 0.5H), 3.95 (q,  $J = 9.1$  Hz, 0.5H), 3.90 – 3.81 (m, 0.5H), 3.65 – 3.53 (m, 0.5H), 3.02 (s, 0.5H), 2.89 – 2.78 (m, 1.5H), 1.93 – 1.78 (m, 1H), 1.50 – 1.46 (m, 0.5H), 1.40 – 1.25 (m, 2.5H), 1.24 – 1.16 (m, 0.5H), 0.60 – 0.51 (m, 0.5H).

$^{13}\text{C}$  NMR (101 MHz, Chloroform-*d*)  $\delta$  137.50, 136.90, 136.08, 135.37 – 133.70 (m), 131.97, 131.63 (dt,  $J = 5.1, 2.4$  Hz), 131.27 – 130.81 (m), 128.56 – 127.93 (m), 68.28 (dd,  $J = 80.9, 6.1$  Hz), 49.19, 44.80, 43.72, 43.43, 42.13, 41.44, 39.35 (t,  $J = 7.6$  Hz), 29.36, 28.67.

$^{31}\text{P}$  NMR (162 MHz, Chloroform-*d*)  $\delta$  80.88, 80.23.

HRMS (ESI,  $m/z$ ): calcd for  $\text{C}_{20}\text{H}_{21}\text{OPS}$   $[\text{M}+\text{H}]^+$ : 341.1124 found: 341.1120.

#### *O*-(hex-5-en-1-yl) diphenylphosphinothioate (**3ar'**)

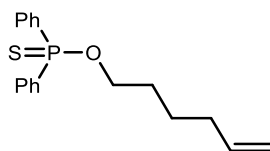

Synthesized by method D using diphenylphosphane (89  $\mu\text{L}$ , 0.5 mmol) and hex-5-en-1-ol (100 mg, 1.0 mmol), followed by further purification to obtained a white solid (142.1 mg, yield 84%).

$^1\text{H}$  NMR (400 MHz, Chloroform-*d*)  $\delta$  7.94 – 7.83 (m, 4H), 7.53 – 7.35 (m, 6H), 5.85 – 5.69 (m, 1H), 5.08 – 4.91 (m, 2H), 4.08 – 3.97 (m, 2H), 2.12 – 2.02 (m, 2H), 1.78 – 1.67 (m, 2H), 1.61 – 1.44 (m, 2H).

$^{13}\text{C}$  NMR (101 MHz, Chloroform-*d*)  $\delta$  138.18, 134.51 (d,  $J = 110.4$  Hz), 131.64 (d,  $J = 3.1$  Hz), 131.02 (d,  $J = 11.1$  Hz), 128.28 (d,  $J = 13.2$  Hz), 114.74, 64.60 (d,  $J = 5.9$  Hz), 33.06, 29.57 (d,  $J = 7.9$  Hz), 24.85.

$^{31}\text{P}$  NMR (162 MHz, Chloroform-*d*)  $\delta$  81.07.

HRMS (ESI,  $m/z$ ): calcd for  $\text{C}_{20}\text{H}_{19}\text{OPS}$   $[\text{M}+\text{H}]^+$ : 339.0967 found: 339.0964.

#### *O*-(pent-4-yn-1-yl) diphenylphosphinothioate (**3as'**)

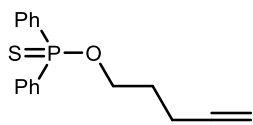

Synthesized by method D using diphenylphosphane and pent-4-yn-1-ol (84 mg, 1.0 mmol), followed by further purification to obtained a yellow liquid (112.5 mg, yield 75%).

$^1\text{H}$  NMR (400 MHz, Chloroform-*d*)  $\delta$  7.92 – 7.82 (m, 4H), 7.53 – 7.36 (m, 6H), 4.94 – 4.84 (m, 1H), 1.32 – 1.24 (m, 6H).

$^{13}\text{C}$  NMR (101 MHz, Chloroform-*d*)  $\delta$  135.57 (d,  $J = 111.0$  Hz), 131.51 (d,  $J = 3.0$  Hz), 131.06 (d,  $J = 11.4$  Hz), 128.20 (d,  $J = 13.3$  Hz), 70.45 (d,  $J = 5.8$  Hz), 24.00 (d,  $J = 4.4$  Hz).

$^{31}\text{P}$  NMR (162 MHz, Chloroform-*d*)  $\delta$  78.58.

HRMS (ESI, m/z): calcd for C<sub>17</sub>H<sub>17</sub>OPS [M+H]<sup>+</sup>: 301.0811 found: 301.0806.

*O*-phenethyl diphenylphosphinothioate (**3at'**)

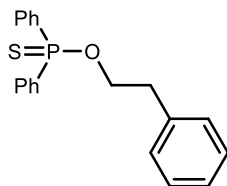

Synthesized by method D using diphenylphosphane and 2-phenylethan-1-ol (122 mg, 1.0 mmol), followed by further purification to obtained a yellow liquid (157.2 mg, yield 93%).

<sup>1</sup>H NMR (400 MHz, Chloroform-*d*) δ 7.81 – 7.70 (m, 4H), 7.50 – 7.38 (m, 6H), 7.36 – 7.12 (m, 5H), 4.26 – 4.15 (m, 2H), 3.06 – 2.95 (m, 2H).

<sup>13</sup>C NMR (101 MHz, Chloroform-*d*) δ 137.53, 134.31 (d, *J* = 110.3 Hz), 131.63 (d, *J* = 3.0 Hz), 130.99 (d, *J* = 11.3 Hz), 129.01, 128.34 (d, *J* = 4.0 Hz), 128.18, 126.50, 65.29 (d, *J* = 5.7 Hz), 36.74 (d, *J* = 8.2 Hz).

<sup>31</sup>P NMR (162 MHz, Chloroform-*d*) δ 81.41.

HRMS (ESI, m/z): calcd for C<sub>20</sub>H<sub>19</sub>OPS [M+H]<sup>+</sup>: 339.0967 found: 339.0961.

*O*-isopropyl diphenylphosphinothioate (**3au'**) [1]

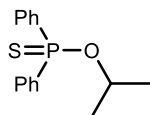

Synthesized by method E using diphenylphosphane and propan-2-ol (0.35 mL, 6.0 mmol), followed by further purification to obtained a yellow liquid (96.7 mg, yield 72%).

<sup>1</sup>H NMR (400 MHz, Chloroform-*d*) δ 7.91 (ddt, *J* = 13.5, 8.1, 1.3 Hz, 4H), 7.60 – 7.37 (m, 6H), 5.02 – 4.83 (m, 1H), 1.40 – 1.26 (m, 6H).

<sup>13</sup>C NMR (101 MHz, Chloroform-*d*) δ 135.57 (d, *J* = 111.0 Hz), 131.51 (d, *J* = 3.0 Hz), 131.06 (d, *J* = 11.4 Hz), 128.20 (d, *J* = 13.3 Hz), 70.45 (d, *J* = 5.8 Hz), 24.00 (d, *J* = 4.4 Hz).

<sup>31</sup>P NMR (162 MHz, Chloroform-*d*) δ 78.58.

*O*-cyclohexyl diphenylphosphinothioate (**3av'**)

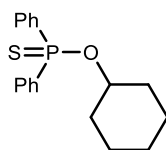

Synthesized by method E using diphenylphosphane and cyclohexanol (0.64 mL, 6.0 mmol), followed by further purification to obtained a yellow liquid (94.9 mg, yield 60%).

<sup>1</sup>H NMR (400 MHz, Chloroform-*d*) δ 8.12 – 7.65 (m, 4H), 7.51 – 7.27 (m, 6H), 4.70 – 4.57 (m, 1H), 1.90 – 1.78 (m, 2H), 1.76 – 1.64 (m, 2H), 1.62 – 1.40 (m, 3H), 1.39 – 1.17 (m, 3H).

<sup>13</sup>C NMR (101 MHz, Chloroform-*d*) δ 135.71 (d, *J* = 111.0 Hz), 131.42 (d, *J* = 3.1 Hz), 130.94 (d, *J* = 11.3 Hz), 128.12 (d, *J* = 13.4 Hz), 75.09 (d, *J* = 6.2 Hz), 33.57 (d, *J* = 4.0 Hz), 25.11, 23.52.

<sup>31</sup>P NMR (162 MHz, Chloroform-*d*) δ 78.35.

HRMS (ESI, m/z): calcd for C<sub>18</sub>H<sub>21</sub>OPS [M+H]<sup>+</sup>: 317.1123 found: 317.1119.

## 4.2. Synthesis of compound 4

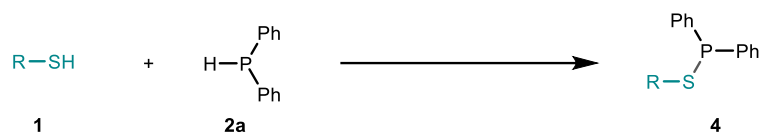

**Method F for the preparation of compound 4 (4a-4w):** In an oven-dried undivided tube (25.0 mL) equipped with a stir bar. The tube was equipped with a platinum plate ( $1.5 \times 1.5 \times 0.03 \text{ cm}^3$ ) as the anode and a platinum plate ( $1.5 \times 1.5 \times 0.03 \text{ cm}^3$ ) as the cathode. The distance of electrodes is 0.6 cm. Thiols or thiophenol (**1'**, 0.5 mmol), TBAI (36.9 mg, 0.1 mmol) were added. This was followed by the addition of diphenylphosphane (96  $\mu\text{L}$ , 0.5 mmol) and extra dry acetonitrile (10 mL) in a glovebox ( $\text{H}_2\text{O}$  and  $\text{O}_2 < 0.1 \text{ ppm}$ ). Then the mixture was stirred at a constant current of 10.0 mA at  $35 \text{ }^\circ\text{C}$  for 4 h ( $J = 4.4 \text{ mA/cm}^2$ , 3.0 F/mol).

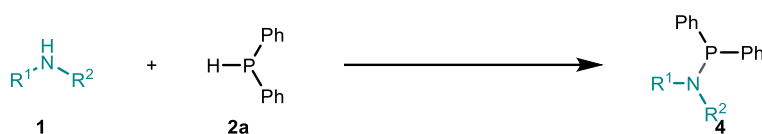

**Method G for the preparation of compound 4 (4ab-4aj):** In an oven-dried undivided tube (25.0 mL) equipped with a stir bar. The tube was equipped with a platinum plate ( $1.5 \times 1.5 \times 0.03 \text{ cm}^3$ ) as the anode and a platinum plate ( $1.5 \times 1.5 \times 0.03 \text{ cm}^3$ ) as the cathode. The distance of electrodes is 0.6 cm. Aniline (**1'**, 1.0 mmol), TBAI (36.9 mg, 0.1 mmol) were added. This was followed by the addition of diphenylphosphane (96  $\mu\text{L}$ , 0.5 mmol) and extra dry acetonitrile (10 mL) in a glovebox ( $\text{H}_2\text{O}$  and  $\text{O}_2 < 0.1 \text{ ppm}$ ). Then the mixture was stirred at a constant current of 10.0 mA at  $35 \text{ }^\circ\text{C}$  for 4 h ( $J = 4.4 \text{ mA/cm}^2$ , 3.0 F/mol).

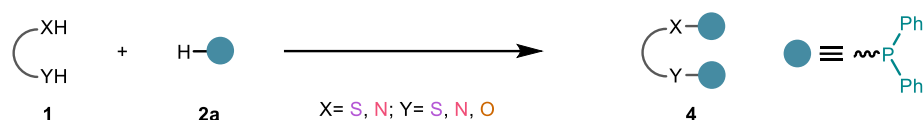

**Method H for the preparation of compound 4 (4x-4aa,3ak-3ap):** In an oven-dried undivided tube (25.0 mL) equipped with a stir bar. The tube was equipped with a platinum plate ( $1.5 \times 1.5 \times 0.03 \text{ cm}^3$ ) as the anode and a platinum plate ( $1.5 \times 1.5 \times 0.03 \text{ cm}^3$ ) as the cathode. The distance of electrodes is 0.6 cm. **1'** (0.25 mmol), TBAI (36.9 mg, 0.1 mmol) were added. This was followed by the addition of diphenylphosphane or Di-tert-butylphosphine (**2a**, 0.7 mmol) and extra dry acetonitrile (10 mL) in a glovebox ( $\text{H}_2\text{O}$  and  $\text{O}_2 < 0.1 \text{ ppm}$ ). Then the mixture was stirred at a constant current of 10.0 mA at  $35 \text{ }^\circ\text{C}$  for 4 h ( $J = 4.4 \text{ mA/cm}^2$ , 6.0 F/mol).

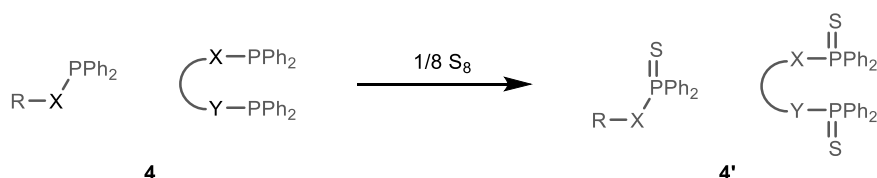

**Fig. S3 Method for determining separation yield**

Due to the easy oxidation of the product in air, was difficult to separate the pure products during the separation process such as flash chromatography. In order to ensure the purity of these products, we added  $\text{S}_8$  (1/8 equiv. of P atom) to the tube at the end of reaction to avoid oxidation and the

mixtures were stirred for 30 minutes. Then the desired products were obtained after purification by flash chromatography on 200-300 silica gel (petroleum: EtOAc = 50: 1).

#### 4-Chlorophenyl diphenylphosphinodithioate (**4a'**) [3]

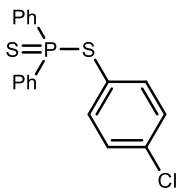

Synthesized by method F using diphenylphosphane (89  $\mu$ L, 0.5 mmol) and 4-Chlorothiophenol (74 mg, 0.5 mmol), followed by further purification to obtained a yellow solid (154.8 mg, yield 86%).

$^1\text{H}$  NMR (400 MHz, Chloroform-*d*)  $\delta$  8.00 – 7.89 (m, 4H), 7.53 – 7.39 (m, 6H), 7.29 – 7.22 (m, 2H), 7.22 – 7.14 (m, 2H).

$^{13}\text{C}$  NMR (101 MHz, Chloroform-*d*)  $\delta$  137.45 (d,  $J = 3.9$  Hz), 136.17 (d,  $J = 3.7$  Hz), 133.16 (d,  $J = 83.9$  Hz), 131.98 (d,  $J = 3.2$  Hz), 131.64 (d,  $J = 11.0$  Hz), 129.03 (d,  $J = 2.6$  Hz), 128.46 (d,  $J = 13.2$  Hz), 125.12 (d,  $J = 5.5$  Hz).

$^{31}\text{P}$  NMR (162 MHz, Chloroform-*d*)  $\delta$  66.00.

#### ((4-Fluorophenyl)thio)diphenylphosphane (**4b**) [4]

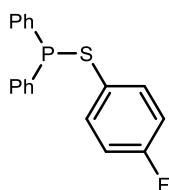

Synthesized by method F using diphenylphosphane (89  $\mu$ L, 0.5 mmol) and 4-fluorobenzenethiol (55  $\mu$ L, 0.5 mmol), followed by further purification to obtained a yellow solid (137.3 mg, yield 88%)

$^1\text{H}$  NMR (400 MHz, Chloroform-*d*)  $\delta$  7.61 – 7.53 (m, 4H), 7.45 – 7.39 (m, 2H), 7.39 – 7.29 (m, 6H), 6.98 – 6.79 (m, 2H).

$^{13}\text{C}$  NMR (101 MHz, Chloroform-*d*)  $\delta$  162.22 (dd,  $J = 247.2, 2.0$  Hz), 137.18 (d,  $J = 23.8$  Hz), 134.21 (d,  $J = 6.7$  Hz), 134.13 (d,  $J = 6.7$  Hz), 132.65 (d,  $J = 20.9$  Hz), 129.37, 128.57 (d,  $J = 6.5$  Hz), 116.01 (d,  $J = 22.0$  Hz).

$^{31}\text{P}$  NMR (162 MHz, Chloroform-*d*)  $\delta$  35.87 (d,  $J = 2.9$  Hz).

$^{19}\text{F}$  NMR (377 MHz, Chloroform-*d*)  $\delta$  -114.39 (d,  $J = 3.0$  Hz).

#### 4-Bromophenyl diphenylphosphinodithioate (**4c'**)

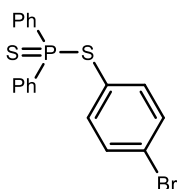

Synthesized by method F using diphenylphosphane (89  $\mu$ L, 0.5 mmol) and 4-Bromothiophenoll (63  $\mu$ L, 0.5 mmol), followed by further purification to obtained a white solid (171.3 mg, yield 85%).

$^1\text{H}$  NMR (400 MHz, Chloroform-*d*)  $\delta$  8.00 – 7.87 (m, 4H), 7.54 – 7.39 (m, 6H), 7.38 – 7.29 (m, 2H), 7.25 – 7.13 (m, 2H).

$^{13}\text{C}$  NMR (101 MHz, Chloroform-*d*)  $\delta$  137.72 (d,  $J = 3.8$  Hz), 133.20 (d,  $J = 84.0$  Hz), 132.04 (d,  $J = 2.9$  Hz), 131.69 (d,  $J = 11.0$  Hz), 128.51 (d,  $J = 13.3$  Hz), 125.82 (d,  $J = 5.6$  Hz), 124.61 (d,  $J = 3.8$  Hz).

$^{31}\text{P}$  NMR (162 MHz, Chloroform-*d*)  $\delta$  65.85.

HRMS (ESI,  $m/z$ ): calcd for  $\text{C}_{18}\text{H}_{14}\text{BrPS}_2$   $[\text{M}+\text{H}]^+$ : 404.9531 found: 404.9519

#### Diphenyl(*p*-tolylthio)phosphane (**4d**)<sup>[4]</sup>

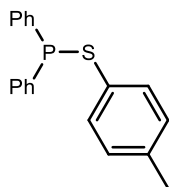

Synthesized by method F using diphenylphosphane (89  $\mu\text{L}$ , 0.5 mmol) and 2-methylbenzenethiol (63 mg, 0.5 mmol), followed by further purification to obtained a white solid (126.3 mg, yield 82%)

$^1\text{H}$  NMR (400 MHz, Chloroform-*d*)  $\delta$  7.62 – 7.52 (m, 4H), 7.41 – 7.27 (m, 8H), 7.06 – 6.99 (m, 2H), 2.28 – 2.24 (m, 3H).

$^{13}\text{C}$  NMR (101 MHz, Chloroform-*d*)  $\delta$  137.61 (d,  $J = 23.8$  Hz), 137.00 (d,  $J = 1.9$  Hz), 132.64 (d,  $J = 20.9$  Hz), 132.13 (d,  $J = 7.2$  Hz), 131.58 (d,  $J = 10.1$  Hz), 131.16 (d,  $J = 14.2$  Hz), 129.45 (d,  $J = 52.9$  Hz), 128.48 (d,  $J = 6.4$  Hz), 21.00.

$^{31}\text{P}$  NMR (162 MHz, Chloroform-*d*)  $\delta$  34.03.

#### ((4-(Tert-butyl)phenyl)thio)diphenylphosphane (**4e**)<sup>[4]</sup>

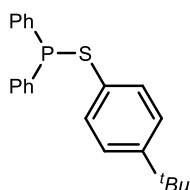

Synthesized by method F using diphenylphosphane (89  $\mu\text{L}$ , 0.5 mmol) and 4-(tert-butyl)benzenethiol (88  $\mu\text{L}$ , 0.5 mmol), followed by further purification to obtained a yellow liquid (145.3 mg, yield 83%).

$^1\text{H}$  NMR (400 MHz, Chloroform-*d*)  $\delta$  7.69 (dtt,  $J = 7.9, 5.2, 2.8$  Hz, 4H), 7.50 (dq,  $J = 8.4, 1.4$  Hz, 2H), 7.49 – 7.42 (m, 6H), 7.36 (dd,  $J = 8.6, 2.4$  Hz, 2H), 1.37 (d,  $J = 2.6$  Hz, 9H).

$^{13}\text{C}$  NMR (101 MHz, Chloroform-*d*)  $\delta$  150.16 (d,  $J = 1.8$  Hz), 137.62 (d,  $J = 23.5$  Hz), 132.67 (d,  $J = 20.9$  Hz), 131.63 (d,  $J = 7.4$  Hz), 131.38 (d,  $J = 14.2$  Hz), 129.21, 128.51 (d,  $J = 6.5$  Hz), 126.05, 34.46, 31.23.

$^{31}\text{P}$  NMR (162 MHz, Chloroform-*d*)  $\delta$  32.92.

#### ((4-Methoxyphenyl)thio)diphenylphosphane (**4f**)<sup>[4]</sup>

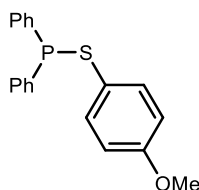

Synthesized by method F using diphenylphosphane (89  $\mu\text{L}$ , 0.5 mmol) and 4-methoxy thiophenol (72 mg, 0.5 mmol), followed by further purification to obtained a white solid (153.1 mg, yield 86%).

$^1\text{H}$  NMR (400 MHz, Chloroform-*d*)  $\delta$  7.68 – 7.51 (m, 4H), 7.42 – 7.25 (m, 8H), 6.87 – 6.63 (m, 2H), 3.80 – 3.62 (m, 3H).

$^{13}\text{C}$  NMR (101 MHz, Chloroform-*d*)  $\delta$  159.24 (d,  $J = 1.8$  Hz), 137.68 (d,  $J = 24.5$  Hz), 134.33 (d,  $J = 5.8$  Hz), 132.64 (d,  $J = 20.8$  Hz), 129.17, 128.46 (d,  $J = 6.3$  Hz), 124.89 (d,  $J = 14.2$  Hz), 114.59, 55.22.

$^{31}\text{P}$  NMR (162 MHz, Chloroform-*d*)  $\delta$  36.38.

#### *N*-(4-((diphenylphosphaneyl)thio)phenyl)acetamide (**4g**)

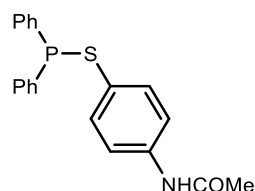

Synthesized by method F using diphenylphosphane (89  $\mu\text{L}$ , 0.5 mmol) and *N*-(4-mercaptophenyl)acetamide (34 mg, 0.5 mmol), followed by further purification to obtained a white solid (136.9 mg, yield 78%).

$^1\text{H}$  NMR (400 MHz, Chloroform-*d*)  $\delta$  8.70 – 8.58 (m, 1H), 7.61 – 7.52 (m, 4H), 7.45 – 7.39 (m, 2H), 7.38 – 7.32 (m, 8H), 2.11 – 2.01 (m, 3H).

$^{13}\text{C}$  NMR (101 MHz, Chloroform-*d*)  $\delta$  169.03, 137.50 (d,  $J = 1.9$  Hz), 137.25 (d,  $J = 23.9$  Hz), 132.79 (d,  $J = 6.9$  Hz), 132.52 (d,  $J = 20.9$  Hz), 129.18, 128.41 (d,  $J = 6.4$  Hz), 120.42, 63.69 (d,  $J = 5.9$  Hz), 24.15.

$^{31}\text{P}$  NMR (162 MHz, Chloroform-*d*)  $\delta$  34.68.

HRMS (ESI, *m/z*): calcd for  $\text{C}_{20}\text{H}_{18}\text{NOPS}$  [ $\text{M}+\text{H}$ ] $^+$ : 352.0919 found: 329.0907.

#### ((3-Fluorophenyl)thio)diphenylphosphane (**4h**)<sup>[4]</sup>

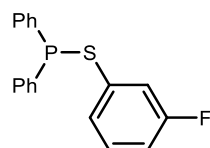

Synthesized by method F using diphenylphosphane (89  $\mu\text{L}$ , 0.5 mmol) and 3-fluorobenzenethiol (55  $\mu\text{L}$ , 0.5 mmol), followed by further purification to obtained a yellow solid (101.4 mg, yield 65%).

$^1\text{H}$  NMR (400 MHz, Chloroform-*d*)  $\delta$  7.63 – 7.52 (m, 4H), 7.41 – 7.32 (m, 6H), 7.27 – 7.14 (m, 3H), 6.93 – 6.83 (m, 1H).

$^{13}\text{C}$  NMR (101 MHz, Chloroform-*d*)  $\delta$  162.55 (d,  $J = 248.7$  Hz), 137.30 (dd,  $J = 14.7, 7.8$  Hz), 136.79 (d,  $J = 23.0$  Hz), 132.68 (d,  $J = 21.2$  Hz), 130.07 (d,  $J = 8.5$  Hz), 129.48, 128.63 (d,  $J = 6.6$  Hz), 127.02 (dd,  $J = 8.3, 3.0$  Hz), 118.23 (dd,  $J = 23.0, 9.1$  Hz), 113.87 (dd,  $J = 21.3, 1.5$  Hz).

$^{31}\text{P}$  NMR (162 MHz, Chloroform-*d*)  $\delta$  32.04.

$^{19}\text{F}$  NMR (377 MHz, Chloroform-*d*)  $\delta$  -111.94.

#### ((2-Fluorophenyl)thio)diphenylphosphane (**4i**)<sup>[4]</sup>

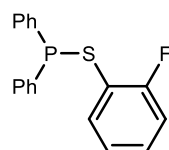

Synthesized by method F using diphenylphosphane (89  $\mu$ L, 0.5 mmol) and 2-Fluorothiophenol (55  $\mu$ L, 0.5 mmol), followed by further purification to obtained a yellow solid (124.8 mg, yield 80%).

$^1\text{H}$  NMR (400 MHz, Chloroform-*d*)  $\delta$  7.60 (ddq,  $J = 9.0, 5.6, 3.1$  Hz, 4H), 7.50 (tt,  $J = 7.5, 2.1$  Hz, 1H), 7.35 (tq,  $J = 5.0, 3.2, 2.3$  Hz, 6H), 7.23 – 7.13 (m, 1H), 7.06 – 6.96 (m, 2H).

$^{13}\text{C}$  NMR (101 MHz, Chloroform-*d*)  $\delta$  161.93 (dd,  $J = 246.2, 2.6$  Hz), 137.15 (d,  $J = 23.6$  Hz), 134.47 (d,  $J = 10.8$  Hz), 132.69 (d,  $J = 21.1$  Hz), 129.39, 129.12 (dd,  $J = 7.8, 1.9$  Hz), 128.55 (d,  $J = 6.4$  Hz), 124.49 (d,  $J = 3.8$  Hz), 121.92 (dd,  $J = 17.9, 14.7$  Hz), 115.81 (d,  $J = 22.7$  Hz).

$^{31}\text{P}$  NMR (162 MHz, Chloroform-*d*)  $\delta$  34.20 (d,  $J = 11.9$  Hz).

$^{19}\text{F}$  NMR (377 MHz, Chloroform-*d*)  $\delta$  -107.19 (d,  $J = 12.2$  Hz).

((2,4-Difluorophenyl)thio)diphenylphosphane (**4j**)<sup>[4]</sup>

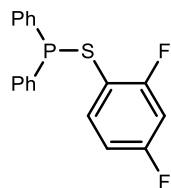

Synthesized by method F using diphenylphosphane (89  $\mu$ L, 0.5 mmol) and 2,4-difluorobenzenethiol (73 mg, 0.5 mmol), followed by further purification to obtained a yellow solid (133.7 mg, yield 81%).

$^1\text{H}$  NMR (400 MHz, Chloroform-*d*)  $\delta$  7.64 – 7.54 (m, 4H), 7.47 – 7.40 (m, 1H), 7.40 – 7.30 (m, 6H), 6.85 – 6.69 (m, 2H).

$^{13}\text{C}$  NMR (101 MHz, Chloroform-*d*)  $\delta$  163.78 (ddd,  $J = 29.6, 11.7, 2.3$  Hz), 161.73 – 160.66 (m), 137.03 (d,  $J = 23.9$  Hz), 136.04 (td,  $J = 8.9, 2.2$  Hz), 132.67 (d,  $J = 21.1$  Hz), 129.46, 128.57 (d,  $J = 6.4$  Hz), 117.12 (ddd,  $J = 19.0, 15.1, 4.1$  Hz), 111.86 (dd,  $J = 21.4, 3.9$  Hz), 104.48 (t,  $J = 26.3$  Hz).

$^{31}\text{P}$  NMR (162 MHz, Chloroform-*d*)  $\delta$  37.45 (dd,  $J = 12.7, 3.8$  Hz).

$^{19}\text{F}$  NMR (377 MHz, Chloroform-*d*)  $\delta$  -101.67 (dd,  $J = 12.6, 8.5$  Hz), -109.41 (dd,  $J = 8.3, 3.4$  Hz).

((2,4-Dimethylphenyl)thio)diphenylphosphane (**4k**)<sup>[4]</sup>

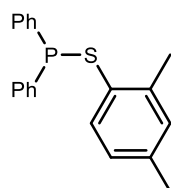

Synthesized by method F using diphenylphosphane (89  $\mu$ L, 0.5 mmol) and 2,4-dimethylbenzenethiol (69 mg, 0.5 mmol), followed by further purification to obtained a yellow solid (132.0 mg, yield 82%).

$^1\text{H}$  NMR (400 MHz, Chloroform-*d*)  $\delta$  7.63 – 7.54 (m, 4H), 7.45 – 7.31 (m, 7H), 7.02 – 6.97 (m, 1H), 6.91 – 6.85 (m, 1H), 2.41 – 2.33 (m, 3H), 2.29 – 2.22 (m, 3H).

$^{13}\text{C}$  NMR (101 MHz, Chloroform-*d*)  $\delta$  140.10 (d,  $J = 2.5$  Hz), 137.90 (d,  $J = 24.2$  Hz), 137.41 (d,  $J = 2.2$  Hz), 133.37 (d,  $J = 10.9$  Hz), 132.70 (d,  $J = 20.9$  Hz), 131.22, 130.29 (d,  $J = 13.2$  Hz), 129.16, 128.46 (d,  $J = 6.4$  Hz), 127.35, 21.32, 20.94.

$^{31}\text{P}$  NMR (162 MHz, Chloroform-*d*)  $\delta$  32.32.

((2,6-Dimethylphenyl)thio)diphenylphosphane (**4l**)<sup>[4]</sup>

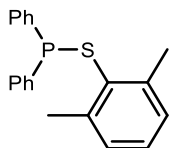

Synthesized by method F using diphenylphosphane (89  $\mu\text{L}$ , 0.5 mmol) and 2,6-dimethylbenzenethiol (69 mg, 0.5 mmol), followed by further purification to obtained a yellow solid (124.0 mg, yield 77%).

$^1\text{H}$  NMR (400 MHz, Chloroform-*d*)  $\delta$  7.65 – 7.55 (m, 4H), 7.38 – 7.27 (m, 6H), 7.12 – 7.01 (m, 3H), 2.42 – 2.37 (m, 6H).

$^{13}\text{C}$  NMR (101 MHz, Chloroform-*d*)  $\delta$  143.29 (d,  $J = 3.2$  Hz), 138.90 (d,  $J = 25.2$  Hz), 132.73 (d,  $J = 21.0$  Hz), 132.41 (d,  $J = 12.3$  Hz), 129.09, 128.39 (d,  $J = 6.5$  Hz), 128.20 (d,  $J = 1.8$  Hz), 128.09 (d,  $J = 2.8$  Hz), 22.96 (d,  $J = 2.5$  Hz).

$^{31}\text{P}$  NMR (162 MHz, Chloroform-*d*)  $\delta$  34.69.

#### ((3,5-Bis(trifluoromethyl)phenylthio)diphenylphosphane (**4m**))<sup>[4]</sup>

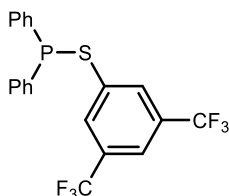

Synthesized by method F using diphenylphosphane (89  $\mu\text{L}$ , 0.5 mmol) and 3,5-bis(trifluoromethyl)benzenethiol (123 mg, 0.5 mmol), followed by further purification to obtained a yellow solid (144.1 mg, yield 67%).

$^1\text{H}$  NMR (400 MHz, Chloroform-*d*)  $\delta$  7.93 – 7.88 (m, 2H), 7.71 – 7.67 (m, 1H), 7.61 – 7.53 (m, 4H), 7.45 – 7.34 (m, 6H).

$^{13}\text{C}$  NMR (101 MHz, Chloroform-*d*)  $\delta$  138.82 (d,  $J = 15.3$  Hz), 135.85 (d,  $J = 22.3$  Hz), 132.77 (d,  $J = 21.2$  Hz), 132.03 (d,  $J = 33.4$  Hz), 131.08 (d,  $J = 5.3$  Hz), 129.92, 128.83 (d,  $J = 6.7$  Hz), 124.33, 121.61, 120.50.

$^{31}\text{P}$  NMR (162 MHz, Chloroform-*d*)  $\delta$  34.34

$^{19}\text{F}$  NMR (377 MHz, Chloroform-*d*)  $\delta$  -62.97.

#### Pyridin-2-yl diphenylphosphinodithioate (**4n'**)

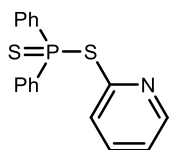

Synthesized by method F using diphenylphosphane (89  $\mu\text{L}$ , 0.5 mmol) and pyridine-2-thiol (56 mg, 0.5 mmol), followed by further purification to obtained a yellow solid (126.3 mg, yield 77%).

$^1\text{H}$  NMR (400 MHz, Chloroform-*d*)  $\delta$  8.42 – 8.37 (m, 1H), 8.06 – 7.96 (m, 4H), 7.65 – 7.58 (m, 1H), 7.56 – 7.50 (m, 1H), 7.50 – 7.39 (m, 6H), 7.20 – 7.09 (m, 1H).

$^{13}\text{C}$  NMR (101 MHz, Chloroform-*d*)  $\delta$  151.23 (d,  $J = 5.0$  Hz), 150.09, 136.77 (d,  $J = 1.3$  Hz), 133.47 (d,  $J = 85.2$  Hz), 131.86 (d,  $J = 3.3$  Hz), 131.63 (d,  $J = 11.3$  Hz), 130.29 (d,  $J = 3.6$  Hz), 128.39 (d,  $J = 13.5$  Hz), 123.22 (d,  $J = 2.0$  Hz).

$^{31}\text{P}$  NMR (162 MHz, Chloroform-*d*)  $\delta$  64.93

HRMS (ESI,  $m/z$ ): calcd for  $\text{C}_{17}\text{H}_{14}\text{NPS}_2$  [ $\text{M}+\text{H}$ ] $^+$ : 328.0378 found: 328.0373.

Butyl diphenylphosphinodithioate (**4o'**) <sup>[5]</sup>

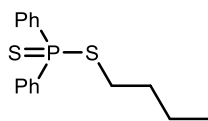

Synthesized by method F using diphenylphosphane (89  $\mu$ L, 0.5 mmol) and butane-1-thiol (45 mg, 0.5 mmol), followed by further purification to obtained a colorless liquid (114.8 mg, yield 75%).

<sup>1</sup>H NMR (400 MHz, Chloroform-*d*)  $\delta$  8.08 – 7.85 (m, 4H), 7.52 – 7.37 (m, 6H), 2.96 – 2.85 (m, 2H), 1.61 – 1.50 (m, 2H), 1.42 – 1.30 (m, 2H), 0.91 – 0.78 (m, 3H).

<sup>13</sup>C NMR (101 MHz, Chloroform-*d*)  $\delta$  134.46 (d,  $J = 84.8$  Hz), 131.63 (d,  $J = 3.2$  Hz), 131.21 (d,  $J = 11.3$  Hz), 128.37 (d,  $J = 13.2$  Hz), 31.84 (d,  $J = 5.4$  Hz), 31.25 (d,  $J = 2.4$  Hz), 21.64, 13.34.

<sup>31</sup>P NMR (162 MHz, Chloroform-*d*)  $\delta$  63.82.

Octyl diphenylphosphinodithioate (**4p'**) <sup>[5]</sup>

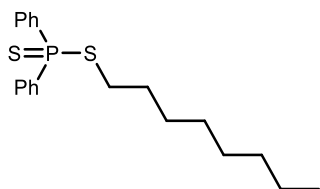

Synthesized by method F using diphenylphosphane (89  $\mu$ L, 0.5 mmol) and octane-1-thiol (73 mg, 0.5 mmol), followed by further purification to obtained a colorless liquid (135.8 mg, yield 75%).

<sup>1</sup>H NMR (400 MHz, Chloroform-*d*)  $\delta$  8.01 – 7.90 (m, 4H), 7.51 – 7.37 (m, 6H), 2.96 – 2.85 (m, 2H), 1.61 – 1.51 (m, 2H), 1.38 – 1.15 (m, 10H), 0.90 – 0.82 (m, 3H).

<sup>13</sup>C NMR (101 MHz, Chloroform-*d*)  $\delta$  134.53 (d,  $J = 84.7$  Hz), 131.62 (d,  $J = 3.2$  Hz), 131.25 (d,  $J = 11.3$  Hz), 128.37 (d,  $J = 13.2$  Hz), 31.66 – 31.51 (m), 29.87, 29.82, 28.91, 28.79, 28.52, 22.47, 13.97.

<sup>31</sup>P NMR (162 MHz, Chloroform-*d*)  $\delta$  63.77.

Dodecyl diphenylphosphinodithioate (**4q'**) <sup>[5]</sup>

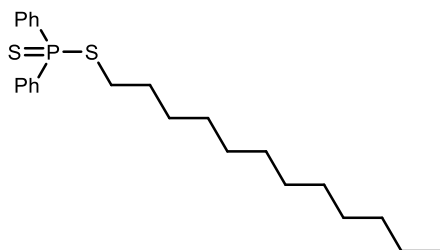

Synthesized by method F using diphenylphosphane (89  $\mu$ L, 0.5 mmol) and dodecane-1-thiol (101 mg, 0.5 mmol), followed by further purification to obtained a colorless liquid (148.4 mg, yield 71%).

<sup>1</sup>H NMR (400 MHz, Chloroform-*d*)  $\delta$  8.01 – 7.91 (m, 4H), 7.52 – 7.39 (m, 6H), 2.96 – 2.85 (m, 2H), 1.63 – 1.51 (m, 2H), 1.40 – 1.12 (m, 20H), 0.92 – 0.84 (m, 3H).

<sup>13</sup>C NMR (101 MHz, Chloroform-*d*)  $\delta$  134.58 (d,  $J = 84.8$  Hz), 131.65 (d,  $J = 3.2$  Hz), 131.29 (d,  $J = 11.3$  Hz), 128.40 (d,  $J = 13.3$  Hz), 31.81, 31.66 (d,  $J = 2.2$  Hz), 29.91, 29.86, 29.52, 29.42, 29.29, 29.24, 28.88, 28.57, 22.59, 14.04.

<sup>31</sup>P NMR (162 MHz, Chloroform-*d*)  $\delta$  63.77.

Allyl diphenylphosphinodithioate (**4r'**) [6]

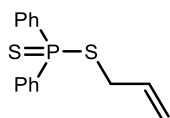

Synthesized by method F using diphenylphosphane (89  $\mu$ L, 0.5 mmol) and prop-2-ene-1-thiol (37 mg, 0.5 mmol), followed by further purification to obtained a colorless liquid (113.1 mg, yield 78%).

$^1\text{H}$  NMR (400 MHz, Chloroform-*d*)  $\delta$  8.07 – 7.66 (m, 4H), 7.56 – 7.35 (m, 6H), 5.91 – 5.74 (m, 1H), 5.36 – 4.96 (m, 2H), 3.67 – 3.18 (m, 2H).

$^{13}\text{C}$  NMR (101 MHz, Chloroform-*d*)  $\delta$  132.20 (d,  $J = 80.3$  Hz), 131.39 (d,  $J = 3.0$  Hz), 131.12 (d,  $J = 9.9$  Hz), 128.40 (dd,  $J = 12.3, 2.4$  Hz), 127.18 (d,  $J = 8.4$  Hz), 121.03 (d,  $J = 13.0$  Hz), 38.96 (d,  $J = 54.4$  Hz).

$^{31}\text{P}$  NMR (162 MHz, Chloroform-*d*)  $\delta$  40.43.

Benzyl diphenylphosphinodithioate (**4s'**) [7]

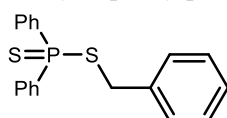

Synthesized by method F using diphenylphosphane (89  $\mu$ L, 0.5 mmol) and thiophene-2-thiol (63 mg, 0.5 mmol), followed by further purification to obtained a colorless liquid (110.5 mg, yield 65%).

$^1\text{H}$  NMR (400 MHz, Chloroform-*d*)  $\delta$  7.94 – 7.84 (m, 4H), 7.46 – 7.40 (m, 2H), 7.40 – 7.32 (m, 4H), 7.23 – 7.20 (m, 2H), 7.18 – 7.09 (m, 3H), 4.16 – 4.09 (m, 2H).

$^{13}\text{C}$  NMR (101 MHz, Chloroform-*d*)  $\delta$  136.46 (d,  $J = 5.6$  Hz), 133.87 (d,  $J = 84.8$  Hz), 131.67 (d,  $J = 3.2$  Hz), 131.28 (d,  $J = 11.3$  Hz), 129.09, 128.43, 128.32 (d,  $J = 3.4$  Hz), 127.26 (d,  $J = 2.2$  Hz), 35.65 (d,  $J = 2.0$  Hz).

$^{31}\text{P}$  NMR (162 MHz, Chloroform-*d*)  $\delta$  64.14.

Methyl 3-((diphenylphosphorothioyl)thio)propanoate (**4t'**) [8]

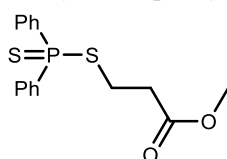

Synthesized by method F using diphenylphosphane (89  $\mu$ L, 0.5 mmol) and methyl 3-mercaptopropanoate (60 mg, 0.5 mmol), followed by further purification to obtained a colorless liquid (110.9 mg, yield 66%).

$^1\text{H}$  NMR (400 MHz, Chloroform-*d*)  $\delta$  7.57 – 7.46 (m, 4H), 7.40 – 7.31 (m, 6H), 3.67 – 3.63 (m, 3H), 3.08 – 2.96 (m, 2H), 2.74 – 2.66 (m, 2H).

$^{13}\text{C}$  NMR (101 MHz, Chloroform-*d*)  $\delta$  172.03, 137.68 (d,  $J = 20.8$  Hz), 132.54 (d,  $J = 20.7$  Hz), 129.12, 128.48 (d,  $J = 6.6$  Hz), 51.72, 36.26 (d,  $J = 6.1$  Hz), 28.42 (d,  $J = 24.7$  Hz).

$^{31}\text{P}$  NMR (162 MHz, Chloroform-*d*)  $\delta$  27.50.

Methyl N-(tert-butoxycarbonyl)-S-(diphenylphosphorothioyl)cysteinate (**4u'**)

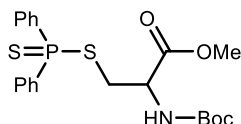

Synthesized by method F using diphenylphosphane (89  $\mu$ L, 0.5 mmol) and methyl acetylcysteinate (89 mg, 0.5 mmol), followed by further purification to obtained a white solid (193.9 mg, yield 86%).

$^1\text{H}$  NMR (400 MHz, Chloroform-*d*)  $\delta$  7.65 – 7.47 (m, 4H), 7.46 – 7.25 (m, 6H), 5.43 – 5.18 (m, 1H), 4.81 – 4.53 (m, 1H), 3.84 – 3.66 (m, 3H), 3.45 – 3.23 (m, 2H), 1.49 – 1.43 (m, 9H).

$^{13}\text{C}$  NMR (101 MHz, Chloroform-*d*)  $\delta$  170.87, 132.46 (dd,  $J = 21.0, 9.3$  Hz), 129.15 (d,  $J = 15.0$  Hz), 128.50, 128.36, 79.91, 54.20, 52.39, 36.32 (d,  $J = 24.7$  Hz), 28.23.

$^{31}\text{P}$  NMR (162 MHz, Chloroform-*d*)  $\delta$  33.17.

HRMS (ESI,  $m/z$ ): calcd for  $\text{C}_{21}\text{H}_{26}\text{NO}_4\text{PS}_2$   $[\text{M}+\text{H}]^+$ : 452.1114 found: 452.1104.

Isopropyl diphenylphosphinodithioate (**4v'**)<sup>[9]</sup>

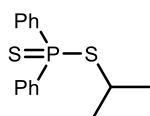

Synthesized by method F using diphenylphosphane (89  $\mu$ L, 0.5 mmol) and propane-2-thiol (50 mg, 0.5 mmol), followed by further purification to obtained a colorless liquid (105.1 mg, yield 72%).

$^1\text{H}$  NMR (400 MHz, Chloroform-*d*)  $\delta$  8.01 – 7.90 (m, 4H), 7.56 – 7.30 (m, 6H), 3.68 – 3.54 (m, 1H), 1.34 – 1.24 (m, 6H).

$^{13}\text{C}$  NMR (101 MHz, Chloroform-*d*)  $\delta$  134.91 (d,  $J = 84.9$  Hz), 131.59 (d,  $J = 3.2$  Hz), 131.29 (d,  $J = 11.3$  Hz), 128.35 (d,  $J = 13.2$  Hz), 39.08 (d,  $J = 2.2$  Hz), 24.99 (d,  $J = 5.0$  Hz).

$^{31}\text{P}$  NMR (162 MHz, Chloroform-*d*)  $\delta$  61.52.

Cyclohexyl diphenylphosphinodithioate (**4w'**)<sup>[10]</sup>

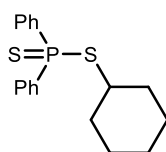

Synthesized by method A using diphenylphosphane (89  $\mu$ L, 0.5 mmol) and cyclohexanethiol (58 mg, 0.5 mmol), followed by further purification to obtained a colorless liquid (117.9 mg, yield 71%).

$^1\text{H}$  NMR (400 MHz, Chloroform-*d*)  $\delta$  8.01 – 7.90 (m, 4H), 7.52 – 7.38 (m, 6H), 3.71 – 3.31 (m, 1H), 1.94 – 1.86 (m, 2H), 1.70 – 1.61 (m, 2H), 1.54 – 1.46 (m, 2H), 1.40 – 1.31 (m, 2H), 1.29 – 1.22 (m, 2H).

$^{13}\text{C}$  NMR (101 MHz, Chloroform-*d*)  $\delta$  135.26 (d,  $J = 84.8$  Hz), 131.61 (d,  $J = 3.2$  Hz), 131.35 (d,  $J = 11.1$  Hz), 128.41 (d,  $J = 13.2$  Hz), 46.84 (d,  $J = 2.2$  Hz), 34.89 (d,  $J = 4.4$  Hz), 25.80, 25.32.

$^{31}\text{P}$  NMR (162 MHz, Chloroform-*d*)  $\delta$  61.73.

Ethane-1,2-diyl bis(diphenylphosphinodithioate) (**4x'**)

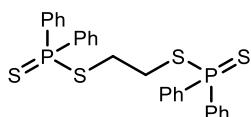

Synthesized by method H using diphenylphosphane (135  $\mu$ L, 0.7 mmol) and ethane-1,2-dithiol (23.5 mg, 0.25 mmol), followed by further purification to obtained a white solid (93.4 mg, yield 71%).

$^1\text{H}$  NMR (400 MHz, Chloroform-*d*)  $\delta$  7.94 – 7.78 (m, 8H), 7.58 – 7.37 (m, 12H), 3.19 – 3.03 (m, 4H).

$^{13}\text{C}$  NMR (101 MHz, Chloroform-*d*)  $\delta$  134.23 (d,  $J = 85.0$  Hz), 131.94 (d,  $J = 3.3$  Hz), 131.39 (d,  $J$

= 11.4 Hz), 128.59 (d,  $J = 13.5$  Hz), 32.05 (dd,  $J = 3.6, 1.9$  Hz).

$^{31}\text{P}$  NMR (162 MHz, Chloroform-*d*)  $\delta$  64.15.

HRMS (ESI, *m/z*): calcd for  $\text{C}_{26}\text{H}_{24}\text{P}_2\text{S}_4$  [ $\text{M}+\text{H}$ ] $^+$ : 527.0309 found: 527.0295.

#### Propane-1,3-diyl bis(diphenylphosphinodithioate) (**4y'**)

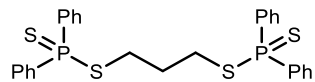

Synthesized by method H using diphenylphosphane (135  $\mu\text{L}$ , 0.7 mmol) and propane-1,3-dithiol (27.0 mg, 0.25 mmol), followed by further purification to obtained a white solid (106.7 mg, yield 79%).

$^1\text{H}$  NMR (400 MHz, Chloroform-*d*)  $\delta$  7.97 – 7.85 (m, 8H), 7.51 – 7.30 (m, 12H), 3.04 – 2.84 (m, 4H), 1.83 (p,  $J = 7.0$  Hz, 2H).

$^{13}\text{C}$  NMR (101 MHz, Chloroform-*d*)  $\delta$  134.20 (d,  $J = 85.0$  Hz), 131.79 (d,  $J = 3.2$  Hz), 131.24 (d,  $J = 11.3$  Hz), 128.46 (d,  $J = 13.3$  Hz), 30.15 (d,  $J = 2.2$  Hz), 30.06 (d,  $J = 4.5$  Hz).

$^{31}\text{P}$  NMR (162 MHz, Chloroform-*d*)  $\delta$  64.11.

HRMS (ESI, *m/z*): calcd for  $\text{C}_{27}\text{H}_{26}\text{P}_2\text{S}_4$  [ $\text{M}+\text{H}$ ] $^+$ : 541.0465 found: 541.0452.

#### Hexane-1,6-diyl bis(diphenylphosphinodithioate) (**4z'**)

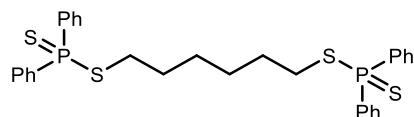

Synthesized by method H using diphenylphosphane (135  $\mu\text{L}$ , 0.7 mmol) and hexane-1,6-dithiol (37.5 mg, 0.25 mmol), followed by further purification to obtained a white solid (131.0 mg, yield 90%).

$^1\text{H}$  NMR (400 MHz, Chloroform-*d*)  $\delta$  6.79 – 6.68 (m, 8H), 6.32 – 6.17 (m, 12H), 1.73 – 1.58 (m, 4H), 0.33 – 0.22 (m, 4H), 0.11 – -0.03 (m, 4H).

$^{13}\text{C}$  NMR (101 MHz, Chloroform-*d*)  $\delta$  134.39 (d,  $J = 84.9$  Hz), 131.68 (d,  $J = 3.2$  Hz), 131.21 (d,  $J = 11.3$  Hz), 128.40 (d,  $J = 13.2$  Hz), 31.38 (d,  $J = 2.3$  Hz), 29.50 (d,  $J = 5.2$  Hz), 27.71.

$^{31}\text{P}$  NMR (162 MHz, Chloroform-*d*)  $\delta$  63.83.

HRMS (ESI, *m/z*): calcd for  $\text{C}_{30}\text{H}_{32}\text{P}_2\text{S}_4$  [ $\text{M}+\text{H}$ ] $^+$ : 583.0935 found: 583.0917.

#### Thiobis(4,1-phenylene) bis(diphenylphosphinodithioate) (**4aa'**)

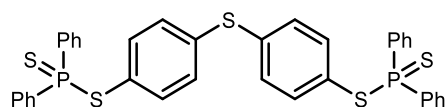

Synthesized by method H using diphenylphosphane (135  $\mu\text{L}$ , 0.7 mmol) and 4,4'-thiodibenzene-1,1'-dithiol (62.5 mg, 0.25 mmol), followed by further purification to obtained a white solid (68.2 mg, yield 40%).

$^1\text{H}$  NMR (400 MHz, Chloroform-*d*)  $\delta$  8.02 – 7.89 (m, 8H), 7.54 – 7.40 (m, 12H), 7.30 – 7.20 (m, 4H), 7.14 – 7.04 (m, 4H).

$^{13}\text{C}$  NMR (101 MHz, Chloroform-*d*)  $\delta$  137.26 (d,  $J = 3.3$  Hz), 136.86 (d,  $J = 3.9$  Hz), 133.30 (d,  $J = 83.7$  Hz), 132.00 (d,  $J = 3.2$  Hz), 131.71 (d,  $J = 11.0$  Hz), 130.96 (d,  $J = 2.5$  Hz), 128.48 (d,  $J = 13.2$  Hz), 125.75 (d,  $J = 5.7$  Hz).

$^{31}\text{P}$  NMR (162 MHz, Chloroform-*d*)  $\delta$  65.88.

HRMS (ESI, *m/z*): calcd for  $\text{C}_{36}\text{H}_{28}\text{P}_2\text{S}_5$  [ $\text{M}+\text{H}$ ] $^+$ : 683.0343 found: 683.0321.

#### *N,P,P*-triphenylphosphinothioic amide (**4ab'**)<sup>[1]</sup>

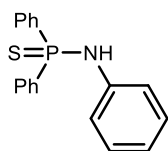

Synthesized by method G using diphenylphosphane (89  $\mu$ L, 0.5 mmol) and aniline (93 mg, 1.0 mmol), followed by further purification to obtained a white solid (92.7 mg, yield 60%).

$^1\text{H}$  NMR (400 MHz, Chloroform-*d*)  $\delta$  8.09 – 7.96 (m, 4H), 7.64 – 7.41 (m, 6H), 7.22 – 7.09 (m, 2H), 6.99 – 6.80 (m, 3H), 4.93 – 4.87 (m, 1H).

$^{13}\text{C}$  NMR (101 MHz, Chloroform-*d*)  $\delta$  140.04, 133.61 (d,  $J = 103.1$  Hz), 132.02 (d,  $J = 3.1$  Hz), 131.62 (d,  $J = 11.4$  Hz), 129.07, 128.75 (d,  $J = 13.2$  Hz), 121.77, 118.81 (d,  $J = 7.0$  Hz).

$^{31}\text{P}$  NMR (162 MHz, Chloroform-*d*)  $\delta$  52.51.

*N*-(4-(tert-butyl)phenyl)-*P,P*-diphenylphosphinothioic amide (**4ac'**)<sup>[1]</sup>

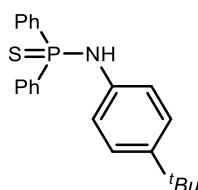

Synthesized by method G using diphenylphosphane (89  $\mu$ L, 0.5 mmol) and 4-(tert-butyl)aniline (149 mg, 1.0 mmol), followed by further purification to obtained a white solid (87.6 mg, yield 48%).

$^1\text{H}$  NMR (400 MHz, Chloroform-*d*)  $\delta$  8.07 – 7.94 (m, 4H), 7.54 – 7.39 (m, 6H), 7.19 – 7.10 (m, 2H), 6.86 – 6.75 (m, 2H), 4.87 (d,  $J = 6.3$  Hz, 1H), 1.22 (s, 9H).

$^{13}\text{C}$  NMR (101 MHz, Chloroform-*d*)  $\delta$  144.40, 137.27 (d,  $J = 2.0$  Hz), 133.74 (d,  $J = 103.2$  Hz), 131.89 (d,  $J = 3.1$  Hz), 131.56 (d,  $J = 11.4$  Hz), 128.65 (d,  $J = 13.2$  Hz), 125.86, 118.43 (d,  $J = 6.8$  Hz), 34.00, 31.30.

$^{31}\text{P}$  NMR (162 MHz, Chloroform-*d*)  $\delta$  52.45.

*N*-(4-cyanophenyl)-*P,P*-diphenylphosphinothioic amide (**4ad'**)

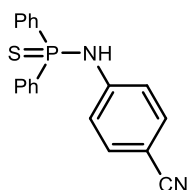

Synthesized by method G using diphenylphosphane (89  $\mu$ L, 0.5 mmol) and 4-aminobenzonitrile (118 mg, 1.0 mmol), followed by further purification to obtained a white solid (85.1 mg, yield 51%).

$^1\text{H}$  NMR (400 MHz, DMSO-*d*<sub>6</sub>)  $\delta$  8.83 (d,  $J = 9.1$  Hz, 1H), 8.03 – 7.90 (m, 4H), 7.67 – 7.52 (m, 8H), 7.16 (d,  $J = 8.5$  Hz, 2H).

$^{13}\text{C}$  NMR (101 MHz, DMSO-*d*<sub>6</sub>)  $\delta$  146.39, 133.04, 132.93 (d,  $J = 102.5$  Hz), 132.32 (d,  $J = 3.0$  Hz), 131.44 (d,  $J = 11.4$  Hz), 128.95 (d,  $J = 13.0$  Hz), 119.40, 118.79 (d,  $J = 8.2$  Hz), 102.26.

$^{31}\text{P}$  NMR (162 MHz, DMSO-*d*<sub>6</sub>)  $\delta$  50.02.

HRMS (ESI, *m/z*): calcd for C<sub>17</sub>H<sub>14</sub>NPS<sub>2</sub> [M+H]<sup>+</sup>: 335.0755 found: 335.0755.

*P,P*-diphenyl-*N*-(4-(trifluoromethyl)phenyl)phosphinothioic amide (**4ae'**)<sup>[1]</sup>

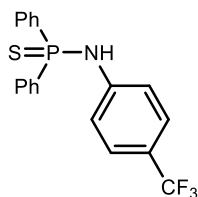

Synthesized by method G using diphenylphosphane (89  $\mu$ L, 0.5 mmol) and 4-(trifluoromethyl)aniline (161 mg, 1.0 mmol), followed by further purification to obtained a white solid (86.7 mg, yield 46%).

$^1\text{H}$  NMR (400 MHz, Chloroform-*d*)  $\delta$  8.04 – 7.93 (m, 4H), 7.61 – 7.42 (m, 6H), 6.98 (d,  $J$  = 8.4 Hz, 2H), 5.28 (d,  $J$  = 6.9 Hz, 1H).

$^{13}\text{C}$  NMR (101 MHz, Chloroform-*d*)  $\delta$  143.33, 132.83 (d,  $J$  = 107.1 Hz), 132.31 (d,  $J$  = 3.3 Hz), 131.50 (d,  $J$  = 11.5 Hz), 128.89 (d,  $J$  = 13.4 Hz), 126.26 (q,  $J$  = 3.7 Hz), 124.25 (d,  $J$  = 271.2 Hz), 123.46 (q,  $J$  = 32.8 Hz), 118.26 (d,  $J$  = 7.3 Hz).

$^{19}\text{F}$  NMR (377 MHz, Chloroform-*d*)  $\delta$  -61.76.

$^{31}\text{P}$  NMR (162 MHz, Chloroform-*d*)  $\delta$  52.65.

*N*-(4-methoxyphenyl)-*P,P*-diphenylphosphinothioic amide (**4af'**) <sup>[1]</sup>

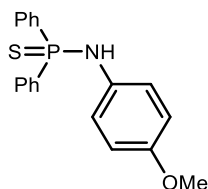

Synthesized by method G using diphenylphosphane (89  $\mu$ L, 0.5 mmol) and 4-methoxyaniline (123 mg, 1.0 mmol), followed by further purification to obtained a white solid (67.8 mg, yield 40%).

$^1\text{H}$  NMR (400 MHz, Chloroform-*d*)  $\delta$  8.07 – 7.97 (m, 4H), 7.56 – 7.41 (m, 6H), 6.87 (d,  $J$  = 8.3 Hz, 2H), 6.70 (d,  $J$  = 8.3 Hz, 2H), 4.71 (d,  $J$  = 5.8 Hz, 1H), 3.70 (s, 3H).

$^{13}\text{C}$  NMR (101 MHz, Chloroform-*d*)  $\delta$  155.05, 133.77 (d,  $J$  = 103.1 Hz), 133.02 (d,  $J$  = 2.3 Hz), 131.92 (d,  $J$  = 3.0 Hz), 131.66 (d,  $J$  = 11.3 Hz), 128.65 (d,  $J$  = 13.2 Hz), 120.98 (d,  $J$  = 6.5 Hz), 114.42, 55.42.

$^{31}\text{P}$  NMR (162 MHz, Chloroform-*d*)  $\delta$  53.52.

*N*-(naphthalen-1-yl)-*P,P*-diphenylphosphinothioic amide (**4ag'**)

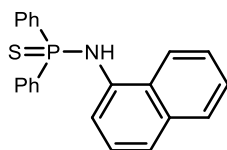

Synthesized by method G using diphenylphosphane (89  $\mu$ L, 0.5 mmol) and naphthalen-1-amine (143 mg, 1.0 mmol), followed by further purification to obtained a white solid (113.1 mg, yield 63%).

$^1\text{H}$  NMR (400 MHz, Chloroform-*d*)  $\delta$  8.13 – 8.02 (m, 4H), 7.86 – 7.79 (m, 2H), 7.55 – 7.41 (m, 9H), 7.38 – 7.32 (m, 1H), 7.19 (t,  $J$  = 7.9 Hz, 1H), 5.39 (d,  $J$  = 6.2 Hz, 1H).

$^{13}\text{C}$  NMR (101 MHz, Chloroform-*d*)  $\delta$  135.19 (d,  $J$  = 2.0 Hz), 134.27, 133.56 (d,  $J$  = 103.4 Hz), 133.40 (t,  $J$  = 5.4 Hz), 132.03 (d,  $J$  = 3.0 Hz), 131.64 (d,  $J$  = 11.3 Hz), 128.96, 128.76 (d,  $J$  = 13.3 Hz), 128.32 – 127.88 (m), 126.11 (d,  $J$  = 7.1 Hz), 125.65, 122.62, 119.79, 115.81 (d,  $J$  = 5.9 Hz).

$^{31}\text{P}$  NMR (162 MHz, Chloroform-*d*)  $\delta$  53.42.

(9H-carbazol-9-yl)diphenylphosphine sulfide (**4ah'**)<sup>[1]</sup>

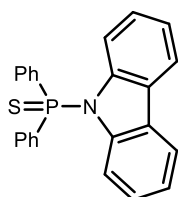

Synthesized by method G using diphenylphosphane (89  $\mu$ L, 0.5 mmol) and 9H-carbazole (167 mg, 1.0 mmol), followed by further purification to obtained a white solid (136.0 mg, yield 71%).

<sup>1</sup>H NMR (400 MHz, Chloroform-*d*)  $\delta$  8.04 – 7.91 (m, 6H), 7.65 – 7.56 (m, 2H), 7.54 – 7.45 (m, 4H), 7.22 (t,  $J$  = 7.7 Hz, 2H), 7.11 – 7.02 (m, 2H), 6.73 (d,  $J$  = 8.5 Hz, 2H).

<sup>13</sup>C NMR (101 MHz, Chloroform-*d*)  $\delta$  141.33 (d,  $J$  = 2.7 Hz), 132.68 (d,  $J$  = 3.2 Hz), 132.55 (d,  $J$  = 11.7 Hz), 132.46 (d,  $J$  = 101.8 Hz), 129.02 (d,  $J$  = 13.7 Hz), 126.83 (d,  $J$  = 5.5 Hz), 125.79, 121.81, 119.89, 115.29 (d,  $J$  = 2.3 Hz).

<sup>31</sup>P NMR (162 MHz, Chloroform-*d*)  $\delta$  56.34.

Morpholinodiphenylphosphine sulfide (**4ai'**)<sup>[11]</sup>

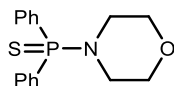

Synthesized by method G using diphenylphosphane (89  $\mu$ L, 0.5 mmol) and morpholine (87 mg, 1.0 mmol), followed by further purification to obtained a white solid (100.0 mg, yield 66%).

<sup>1</sup>H NMR (400 MHz, Chloroform-*d*)  $\delta$  8.06 (ddd,  $J$  = 13.1, 7.6, 1.9 Hz, 4H), 7.46 (dt,  $J$  = 7.2, 4.5 Hz, 6H), 3.74 (t,  $J$  = 4.7 Hz, 4H), 2.87 (q,  $J$  = 5.3 Hz, 4H).

<sup>13</sup>C NMR (101 MHz, Chloroform-*d*)  $\delta$  131.88 (d,  $J$  = 10.5 Hz), 131.67 (d,  $J$  = 2.9 Hz), 131.57 (d,  $J$  = 103.1 Hz), 128.40 (d,  $J$  = 12.8 Hz), 66.47 (d,  $J$  = 10.3 Hz), 44.85 (d,  $J$  = 1.6 Hz).

<sup>31</sup>P NMR (162 MHz, Chloroform-*d*)  $\delta$  67.58.

*N,N*-diethyl-*P,P*-diphenylphosphinothioic amide (**4aj'**)<sup>[12]</sup>

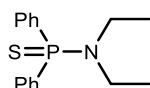

Synthesized by method G using diphenylphosphane (89  $\mu$ L, 0.5 mmol) and diethylamine (73 mg, 1.0 mmol), followed by further purification to obtained a white solid (121.4 mg, yield 84%).

<sup>1</sup>H NMR (400 MHz, Chloroform-*d*)  $\delta$  8.06 – 7.93 (m, 4H), 7.50 – 7.37 (m, 6H), 3.11 – 2.98 (m, 4H), 1.08 (t,  $J$  = 7.1 Hz, 6H).

<sup>13</sup>C NMR (101 MHz, Chloroform-*d*)  $\delta$  133.65 (d,  $J$  = 103.1 Hz), 131.87 (d,  $J$  = 10.6 Hz), 131.27 (d,  $J$  = 2.9 Hz), 128.14 (d,  $J$  = 12.7 Hz), 40.27 (d,  $J$  = 3.2 Hz), 13.52 (d,  $J$  = 5.4 Hz).

<sup>31</sup>P NMR (162 MHz, Chloroform-*d*)  $\delta$  68.42.

*O*-(4-((diphenylphosphorothioyl)thio)phenyl) diphenylphosphinothioate (**4ak'**)

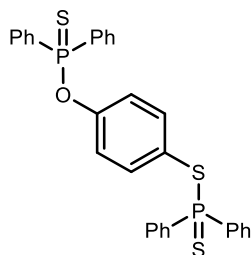

Synthesized by method H using diphenylphosphane (135  $\mu$ L, 0.7 mmol) and 4-mercaptophenol (31.5 mg, 0.25 mmol), followed by further purification to obtained a white solid (104.6 mg, yield 75%).

$^1\text{H}$  NMR (400 MHz, Chloroform-*d*)  $\delta$  7.99 – 7.83 (m, 8H), 7.56 – 7.38 (m, 12H), 7.21 – 7.15 (m, 2H), 6.95 – 6.87 (m, 2H).

$^{13}\text{C}$  NMR (101 MHz, Chloroform-*d*)  $\delta$  137.53, 137.50, 134.11 (d,  $J$  = 78.0 Hz), 133.14 (d,  $J$  = 50.7 Hz), 132.19 (d,  $J$  = 3.0 Hz), 131.93 (d,  $J$  = 3.3 Hz), 131.72 (d,  $J$  = 11.0 Hz), 131.31 (d,  $J$  = 11.7 Hz), 128.57 (d,  $J$  = 7.3 Hz), 128.43 (d,  $J$  = 6.8 Hz), 122.34 (d,  $J$  = 2.5 Hz), 122.29 (d,  $J$  = 2.6 Hz).

$^{31}\text{P}$  NMR (162 MHz, Chloroform-*d*)  $\delta$  82.71 (d,  $J$  = 3.0 Hz), 65.66 (d,  $J$  = 3.7 Hz).

HRMS (ESI,  $m/z$ ): calcd for  $\text{C}_{30}\text{H}_{24}\text{OP}_2\text{S}_3$   $[\text{M}+\text{H}]^+$ : 559.0537 found: 559.0536.

*O*-(4-((diphenylphosphorothioyl)amino)-2-methylphenyl) diphenylphosphinothioate (**4al'**)

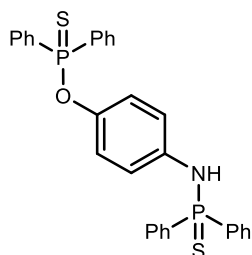

Synthesized by method H using diphenylphosphane (135  $\mu$ L, 0.7 mmol) and 4-aminophenol (27.3 mg, 0.25 mmol), followed by further purification to obtained a white solid (86.7 mg, yield 64%).

$^1\text{H}$  NMR (400 MHz, Chloroform-*d*)  $\delta$  8.01 – 7.85 (m, 8H), 7.54 – 7.39 (m, 12H), 6.85 – 6.73 (m, 4H), 4.84 (d,  $J$  = 6.2 Hz, 1H).

$^{13}\text{C}$  NMR (101 MHz, Chloroform-*d*)  $\delta$  145.18 (d,  $J$  = 9.0 Hz), 136.88, 134.36 (d,  $J$  = 91.1 Hz), 133.30 (d,  $J$  = 83.3 Hz), 132.03 (d,  $J$  = 6.3 Hz), 132.03, 131.58 (d,  $J$  = 11.4 Hz), 131.33 (d,  $J$  = 11.5 Hz), 128.74 (d,  $J$  = 13.4 Hz), 128.44 (d,  $J$  = 13.6 Hz), 122.22 (d,  $J$  = 4.8 Hz), 119.75 (d,  $J$  = 6.5 Hz).

$^{31}\text{P}$  NMR (162 MHz, Chloroform-*d*)  $\delta$  82.10, 52.98.

HRMS (ESI,  $m/z$ ): calcd for  $\text{C}_{30}\text{H}_{25}\text{NOP}_2\text{S}_2$   $[\text{M}+\text{H}]^+$ : 542.0926 found: 542.0911.

*O*-(4-((diphenylphosphorothioyl)amino)phenyl) diphenylphosphinothioate (**4am'**)

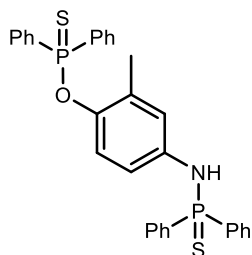

Synthesized by method H using diphenylphosphane (135  $\mu$ L, 0.7 mmol) and 4-amino-2-methylphenol

(30.8 mg, 0.25 mmol), followed by further purification to obtained a white solid (88.8 mg, yield 64%).  
 $^1\text{H}$  NMR (400 MHz, Chloroform-*d*)  $\delta$  8.02 – 7.87 (m, 8H), 7.55 – 7.40 (m, 12H), 6.73 (d,  $J = 2.8$  Hz, 1H), 6.64 (dd,  $J = 8.7, 1.5$  Hz, 1H), 6.52 (dd,  $J = 8.8, 2.9$  Hz, 1H), 4.79 (d,  $J = 6.2$  Hz, 1H), 2.11 (s, 3H).

$^{13}\text{C}$  NMR (101 MHz, Chloroform-*d*)  $\delta$  144.27 (d,  $J = 9.1$  Hz), 136.50, 134.80 (d,  $J = 111.1$  Hz), 133.55 (d,  $J = 103.2$  Hz), 131.95 (d,  $J = 6.3$  Hz), 131.95, 131.55 (d,  $J = 11.4$  Hz), 131.43, 131.17 (d,  $J = 11.5$  Hz), 128.69 (d,  $J = 13.2$  Hz), 128.47 (d,  $J = 13.6$  Hz), 121.89 (d,  $J = 7.1$  Hz), 121.06 (d,  $J = 4.6$  Hz), 116.93 (d,  $J = 6.3$  Hz), 17.41.

$^{31}\text{P}$  NMR (162 MHz, Chloroform-*d*)  $\delta$  80.91, 52.98.

HRMS (ESI, *m/z*): calcd for  $\text{C}_{31}\text{H}_{27}\text{NOP}_2\text{S}_2$   $[\text{M}+\text{H}]^+$ : 556.1082 found: 556.1067.

#### 4-((Diphenylphosphorothioyl)amino)phenyl diphenylphosphinodithioate (**4an'**)

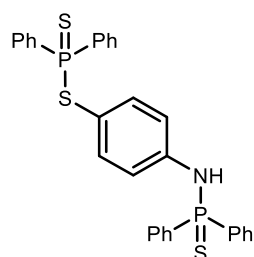

Synthesized by method H using diphenylphosphane (135  $\mu\text{L}$ , 0.7 mmol) and 4-aminobenzenethiol (31.3 mg, 0.25 mmol), followed by further purification to obtained a white solid (107.2 mg, yield 77%).

$^1\text{H}$  NMR (400 MHz, DMSO-*d*<sub>6</sub>)  $\delta$  8.34 (d,  $J = 8.6$  Hz, 1H), 8.00 – 7.84 (m, 8H), 7.64 – 7.48 (m, 12H), 7.30 (d,  $J = 2.0$  Hz, 1H), 7.09 (d,  $J = 8.4$  Hz, 1H), 6.99 (t,  $J = 8.0$  Hz, 1H), 6.77 (d,  $J = 7.6$  Hz, 1H).

$^{13}\text{C}$  NMR (101 MHz, DMSO-*d*<sub>6</sub>)  $\delta$  142.43 (d,  $J = 2.3$  Hz), 133.81 (d,  $J = 54.7$  Hz), 132.88 (d,  $J = 35.3$  Hz), 132.18 (dd,  $J = 35.5, 3.0$  Hz), 131.42 (d,  $J = 11.3$  Hz), 131.25 (d,  $J = 11.0$  Hz), 128.92 (d,  $J = 13.1$  Hz), 128.75 (d,  $J = 12.9$  Hz), 127.77 (d,  $J = 4.0$  Hz), 126.42 (d,  $J = 5.6$  Hz).

$^{31}\text{P}$  NMR (162 MHz, DMSO-*d*<sub>6</sub>)  $\delta$  64.66, 49.92.

HRMS (ESI, *m/z*): calcd for  $\text{C}_{30}\text{H}_{25}\text{NP}_2\text{S}_3$   $[\text{M}+\text{H}]^+$ : 558.0697 found: 558.0705.

#### 3-((Diphenylphosphorothioyl)amino)phenyl diphenylphosphinodithioate (**4ao'**)

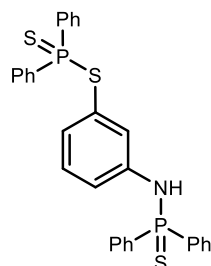

Synthesized by method H using diphenylphosphane (135  $\mu\text{L}$ , 0.7 mmol) and 3-aminobenzenethiol (31.3 mg, 0.25 mmol), followed by further purification to obtained a white solid (87.7 mg, yield 63%).

$^1\text{H}$  NMR (400 MHz, DMSO-*d*<sub>6</sub>)  $\delta$  8.42 (d,  $J = 8.9$  Hz, 1H), 7.97 – 7.83 (m, 8H), 7.64 – 7.47 (m, 12H), 7.12 – 7.05 (m, 2H), 6.98 – 6.91 (m, 2H).

$^{13}\text{C}$  NMR (101 MHz, DMSO-*d*<sub>6</sub>)  $\delta$  143.62, 136.64 (d,  $J = 3.4$  Hz), 133.62 (d,  $J = 45.6$  Hz), 132.70 (d,  $J = 25.2$  Hz), 132.35 (d,  $J = 3.1$  Hz), 132.13 (d,  $J = 2.9$  Hz), 131.43 (d,  $J = 7.9$  Hz), 131.32 (d,  $J$

= 7.4 Hz), 128.94 (d,  $J = 6.6$  Hz), 128.81 (d,  $J = 6.7$  Hz), 119.12 (d,  $J = 8.0$  Hz), 116.11 (d,  $J = 5.5$  Hz).

$^{31}\text{P}$  NMR (162 MHz, DMSO- $d_6$ )  $\delta$  64.90, 49.62.

HRMS (ESI,  $m/z$ ): calcd for  $\text{C}_{30}\text{H}_{25}\text{NP}_2\text{S}_3$   $[\text{M}+\text{H}]^+$ : 558.0697 found: 558.0691.

#### *O*-(3-((diphenylphosphorothioyl)thio)phenyl) diphenylphosphinothioate (**4ap'**)

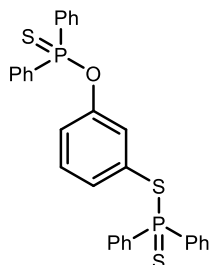

Synthesized by method H using diphenylphosphane (135  $\mu\text{L}$ , 0.7 mmol) and 3-mercaptophenol (31.5 mg, 0.25 mmol), followed by further purification to obtained a white solid (103.4 mg, yield 74%).

$^1\text{H}$  NMR (400 MHz, Chloroform- $d$ )  $\delta$  7.96 – 7.84 (m, 8H), 7.53 – 7.36 (m, 12H), 7.16 (p,  $J = 1.9$  Hz, 1H), 7.11 – 6.97 (m, 3H).

$^{13}\text{C}$  NMR (101 MHz, Chloroform- $d$ )  $\delta$  150.39 (dd,  $J = 8.8, 2.6$  Hz), 134.07 (d,  $J = 78.1$  Hz), 133.10 (d,  $J = 51.1$  Hz), 132.53 (dd,  $J = 4.0, 1.7$  Hz), 132.08 (d,  $J = 3.1$  Hz), 131.89 (d,  $J = 3.2$  Hz), 131.64 (d,  $J = 11.0$  Hz), 131.25 (d,  $J = 11.7$  Hz), 129.30 (d,  $J = 4.4$  Hz), 129.25 (d), 127.97 (d,  $J = 5.5$  Hz), 122.92 (dd,  $J = 4.8, 3.0$  Hz).

$^{31}\text{P}$  NMR (162 MHz, Chloroform- $d$ )  $\delta$  82.89, 65.69.

HRMS (ESI,  $m/z$ ): calcd for  $\text{C}_{30}\text{H}_{24}\text{OP}_2\text{S}_3$   $[\text{M}+\text{H}]^+$ : 559.0537 found: 559.0529.

### 4.3. Synthesis of intermediates

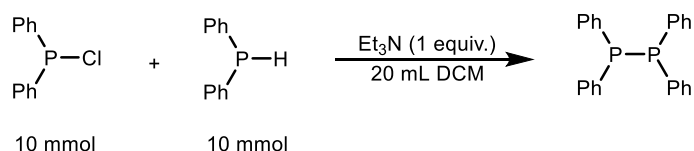

**Fig. S4 Synthesis of 1,1,2,2-tetraphenyldiphosphane**

Diphenylphosphine (1.8 g, 10 mmol) and chlorodiphenylphosphine (2.2 g, 10 mmol) were placed in a 20 mL microwave vessel in the glovebox filled with nitrogen.  $\text{Et}_3\text{N}$  (1.4 mL, 10 mmol) and THF (10 mL) were added to the vessel at 0  $^\circ\text{C}$ , and the solution was stirred at room temperature for 12 h. After the mixture was filtered through a pad of Celite and washed by degassed n-hexane in the glovebox, the solvent was removed under reduced pressure to give an analytically pure tetraphenyldiphosphane in 79% yield.  $^1\text{H}$  NMR (400 MHz, Chloroform- $d$ )  $\delta$  7.41 – 7.33 (m, 8H), 7.27 – 7.12 (m, 12H).  $^{13}\text{C}$  NMR (101 MHz, Chloroform- $d$ )  $\delta$  135.63 (t,  $J = 5.0$  Hz), 134.28 (t,  $J = 12.9$  Hz), 128.63, 128.18 (t,  $J = 3.5$  Hz).  $^{31}\text{P}$  NMR (162 MHz, Chloroform- $d$ )  $\delta$  -14.92.<sup>[13]</sup>

### 4.4. Gram scale experiment

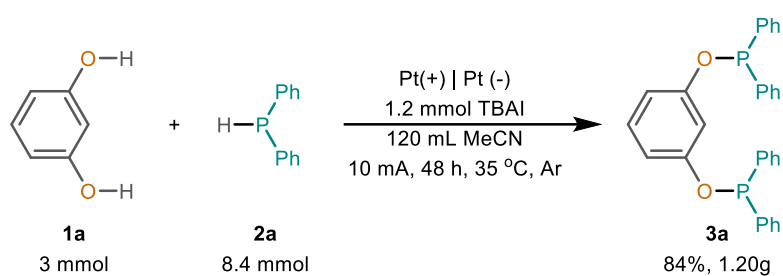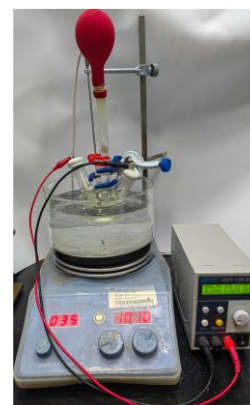

**Fig. S5 Gram scale experiment**

In an oven-dried three-necked flask equipped with a stir bar. The tube was equipped with a platinum plate ( $1.5 \times 1.5 \times 0.03 \text{ cm}^3$ ) as the anode and a platinum plate ( $1.5 \times 1.5 \times 0.03 \text{ cm}^3$ ) as the cathode. M-diphenol (**1a**, 330.0 mg, 3.0 mmol), TBAI (442.8 mg, 1.2 mmol) were added. This was followed by the addition of diphenylphosphane (**2a**, 1.62 mL, 8.4 mmol) and extra dry acetonitrile (120 mL) in a glovebox ( $\text{H}_2\text{O}$  and  $\text{O}_2 < 0.1 \text{ ppm}$ ). Then the mixture was stirred at a constant current of 10.0 mA at 35 °C for 48 h. The yield was then determined by assured  $^{31}\text{P}$  NMR. Because trivalent products are easy to oxidize in air, the products are easy to deteriorate in the separation process of column chromatography. In order to ensure the purity of the product, after the reaction, add  $\text{S}_8$  (96.0 mg, 6.00 mmol, calculated according to S atom) into the reaction tube to stabilize the trivalent phosphorus, stirred for 30 min, and then purified by column chromatography (200-300 mesh silica gel, petroleum ether (PE): ethyl acetate (EA)=50:1), to obtain the required product of 1.2 g.

#### 4.5. Unsuccessful examples

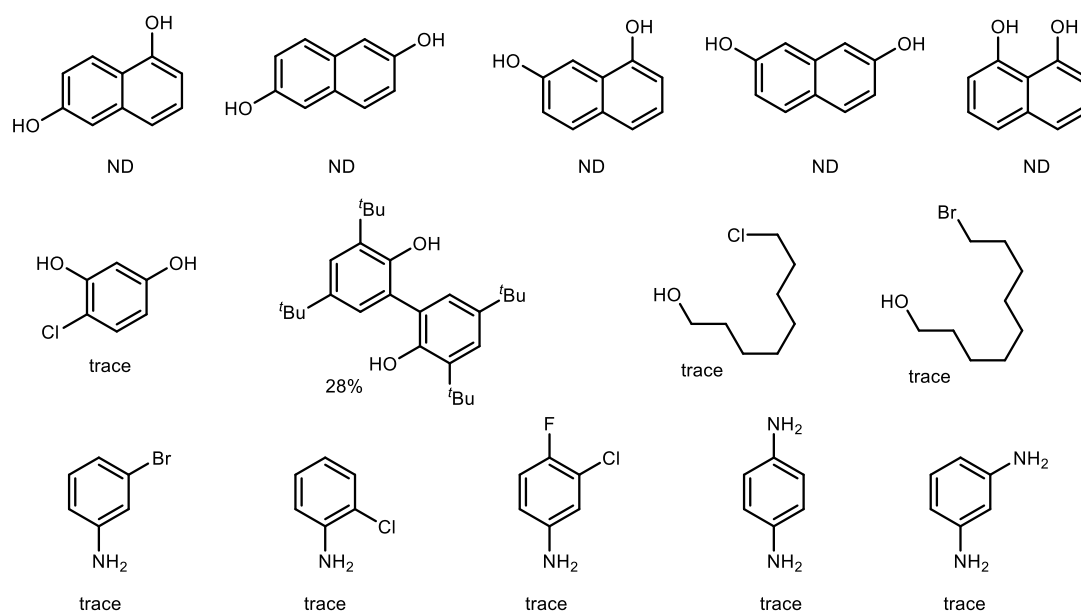

Table S4. Unsuccessful example

## 5. Experimental Procedures for Control Experiment

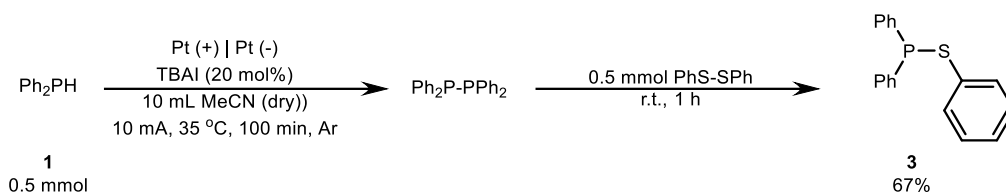

Table S5. Control experiment for P-S bonding

In an oven-dried undivided tube (25.0 mL) equipped with a stir bar. The tube was equipped with a platinum plate ( $1.5 \times 1.5 \times 0.03 \text{ cm}^3$ ) as the anode and a platinum plate ( $1.5 \times 1.5 \times 0.03 \text{ cm}^3$ ) as the cathode. The distance of electrodes is 0.6 cm. TBAI (36.9 mg, 0.1 mmol) was added. This was followed by the addition of diphenylphosphane (89  $\mu\text{L}$ , 0.5 mmol) and extra dry acetonitrile (10 mL) in a glovebox ( $\text{H}_2\text{O}$  and  $\text{O}_2 < 0.1 \text{ ppm}$ ). Then the mixture was stirred at a constant current of 10.0 mA at 35  $^\circ\text{C}$  for 100 minutes. Then diphenyl disulfide (54.6 mg, 0.25 mmol) was added to the system and stirred for 1 h. Then the yield was determined by assure  $^{31}\text{P}$  NMR.

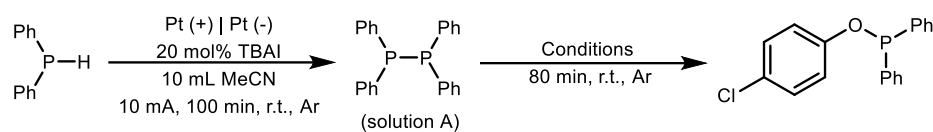

| Entry | Conditions                                     | Yield of <b>3w</b> |
|-------|------------------------------------------------|--------------------|
| 1     | 4-Cl-PhOH as substrate, Pt (+)   Pt (-), 10 mA | 52%                |
| 2     | 4-Cl-PhOH as substrate, no electricity         | n.d.               |
| 3     | 4-Cl-PhONa as substrate, no electricity        | n.d.               |

Table S6. Control experiment for P-O bonding

In an oven-dried undivided tube (25.0 mL) equipped with a stir bar. The tube was equipped with a platinum plate ( $1.5 \times 1.5 \times 0.03 \text{ cm}^3$ ) as the anode and a platinum plate ( $1.5 \times 1.5 \times 0.03 \text{ cm}^3$ ) as the cathode. The distance of electrodes is 0.6 cm. TBAI (36.9 mg, 0.1 mmol) was added. This was followed by the addition of diphenylphosphane (89  $\mu\text{L}$ , 0.5 mmol) and extra dry acetonitrile (10 mL) in a glovebox ( $\text{H}_2\text{O}$  and  $\text{O}_2 < 0.1 \text{ ppm}$ ). Then the mixture was stirred at a constant current of 10.0 mA at 35  $^\circ\text{C}$  for 100 minutes. After electrolysis, for entry 1, *p*-chlorophenylthiophenol was added to the solution and was stirred at a constant current of 10.0 mA at 35  $^\circ\text{C}$  for 80 minutes; for entries 2-3, *p*-chlorophenylthiophenol or sodium *p*-chlorophenylthiophenol was added to the solution and was stirred for 80 minutes. Then the yield was determined by assure  $^{31}\text{P}$  NMR.

## 6. Electrochemical Procedures for Cyclic Voltammetry

Cyclic voltammograms were recorded with a CorrTest® CS2350H bipotentiostat at room temperature. TBAPF<sub>6</sub> (38.9 mg, 0.10 mmol) was used as the supporting electrolyte. The scan rate was 100 mV / s. The scan range is between 0 V to 2.0 V.

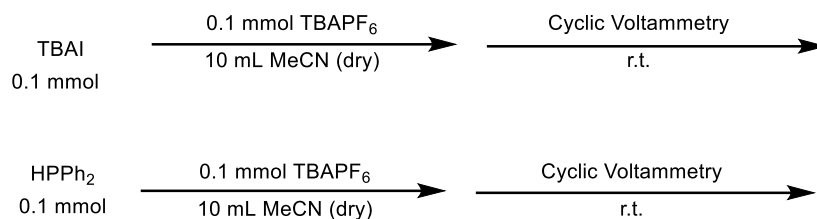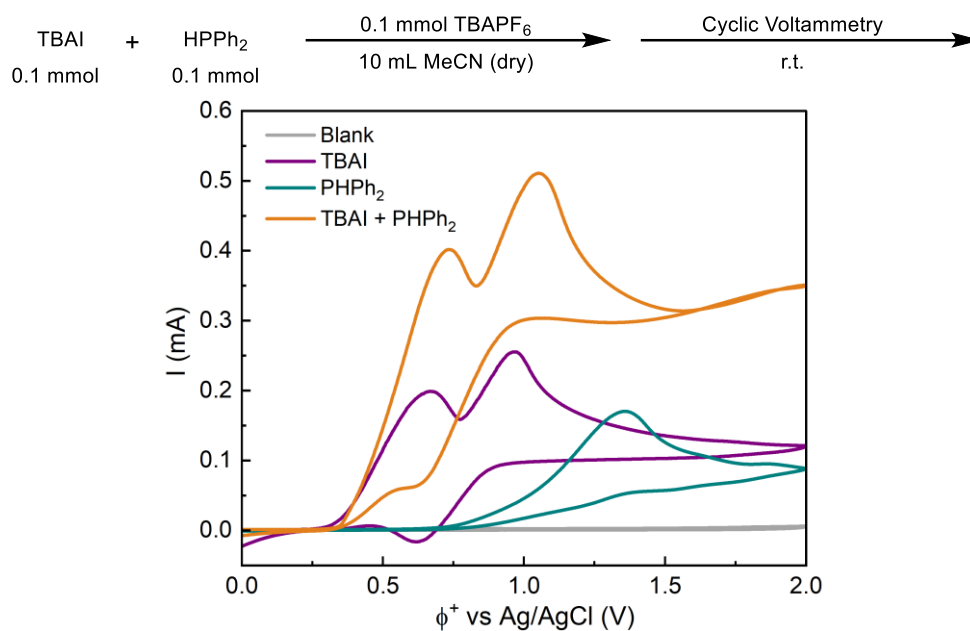

**Fig. S6 Cyclic voltammery curve for diphenylphosphine and TBAI**

In an undivided cell equipped with a stir bar, TBAPF<sub>6</sub> (38.9 mg, 0.10 mmol), TBAI (36.9 mg, 0.10 mmol), or diphenylphosphine (18.6 mg, 0.10 mmol) was added as required, followed by MeCN (10 mL). The undivided cell was equipped with glassy-carbon disk working electrode (diameter, 3.0 mm) and Pt wire auxiliary electrode. All potentials are referenced against the Ag/AgCl reference electrode.

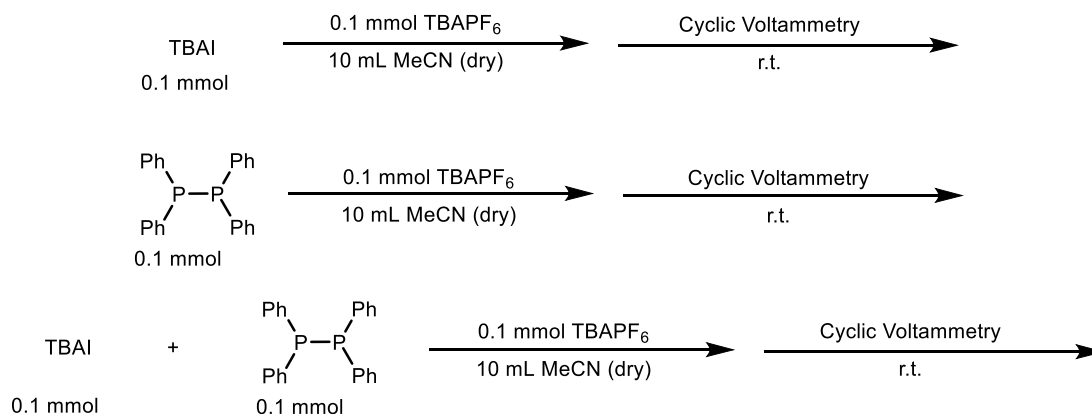

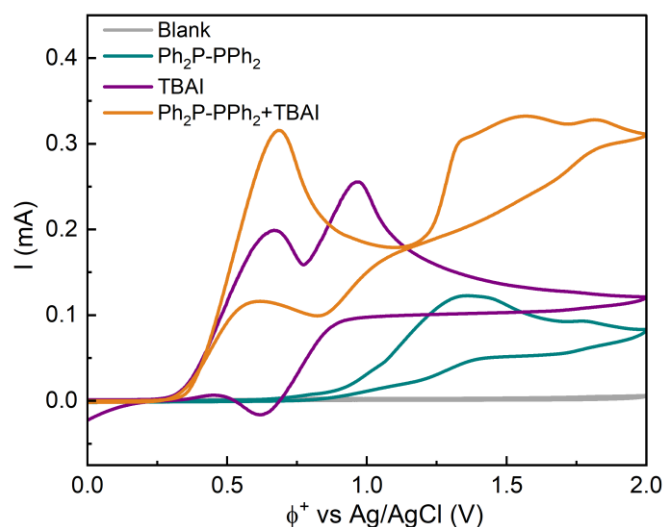

**Fig. S7 Cyclic voltammery curve for TBAI and 1,1,2,2-tetraphenyldiphosphane**

In an undivided cell equipped with a stir bar, TBAPF<sub>6</sub> (38.9 mg, 0.10 mmol), TBAI (36.9 mg, 0.10 mmol), or 1,1,2,2-tetraphenyldiphosphane (37.0 mg, 0.10 mmol) was added as required, followed by MeCN (10 mL). The undivided cell was equipped with glassy-carbon disk working electrode (diameter, 3.0 mm) and Pt wire auxiliary electrode. All potentials are referenced against the Ag/AgCl reference electrode.

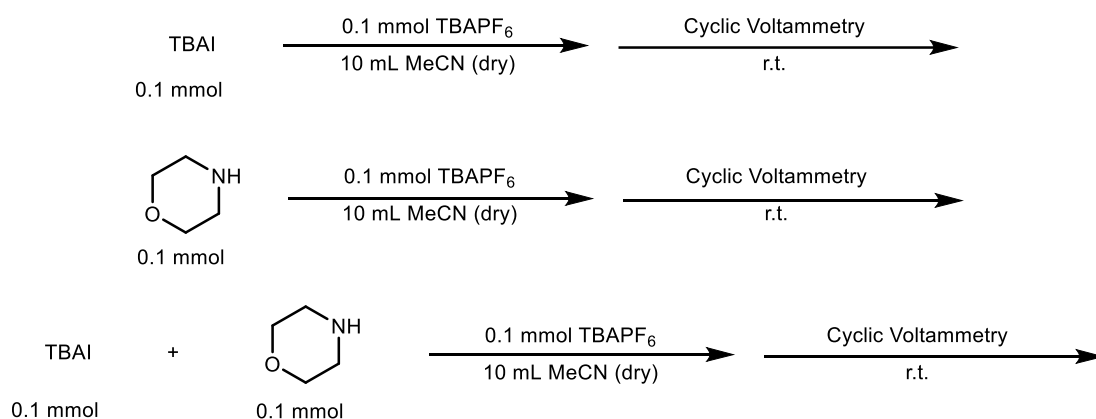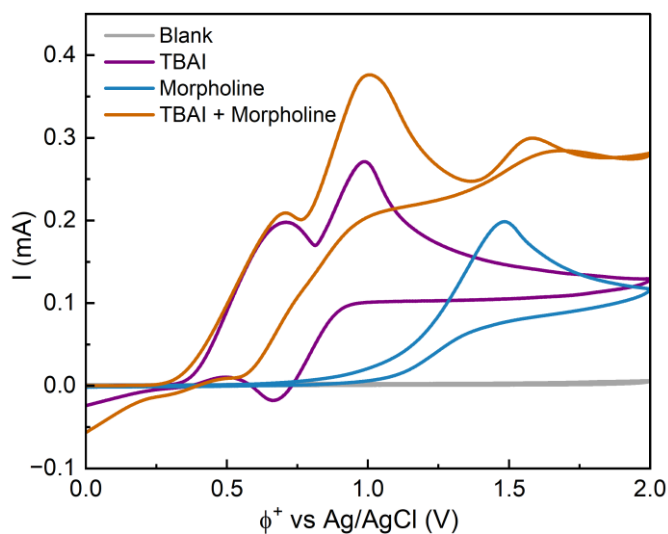

**Fig. S8 Cyclic voltammery curve for TBAI and morpholine**

In an undivided cell equipped with a stir bar, TBAPF<sub>6</sub> (38.9 mg, 0.10 mmol), TBAI (36.9 mg, 0.10 mmol), or morpholine (8.2 mg, 0.10 mmol) was added as required, followed by MeCN (10 mL). The undivided cell was equipped with glassy-carbon disk working electrode (diameter, 3.0 mm) and Pt wire auxiliary electrode. The scan range was 0 V to 2.0 V. All potentials are referenced against the Ag/AgCl reference electrode.

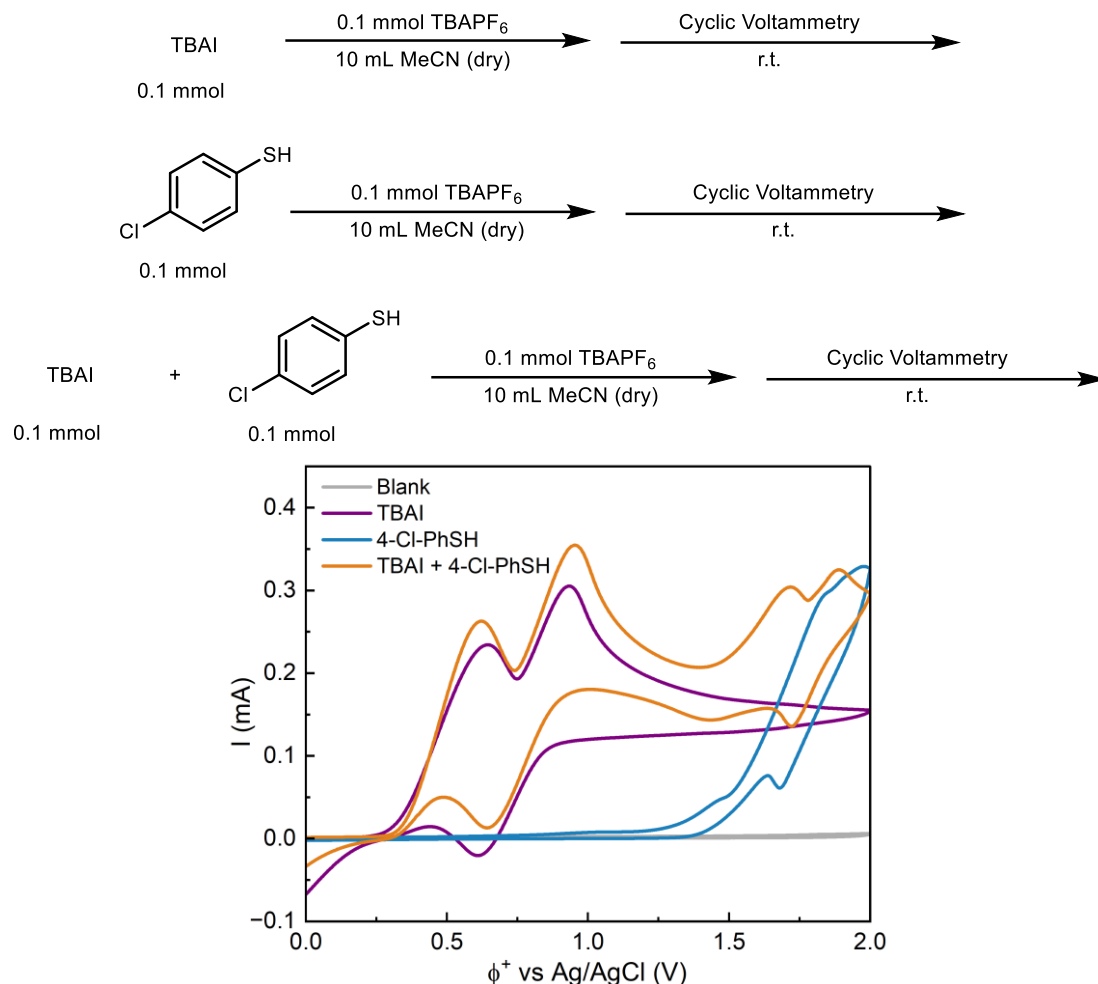

**Fig. S9** Cyclic voltammetry curve for TBAI and phenylthiophenol

In an undivided cell equipped with a stir bar, TBAPF<sub>6</sub> (38.9 mg, 0.10 mmol), TBAI (36.9 mg, 0.10 mmol), or 4-chlorothiophenol (12.8 mg, 0.10 mmol) was added as required, followed by MeCN (10 mL). The undivided cell was equipped with glassy-carbon disk working electrode (diameter, 3.0 mm) and Pt wire auxiliary electrode. The scan range was 0 V to 2.0 V. All potentials are referenced against the Ag/AgCl reference electrode.

## 7. Experimental Procedures for Sampling Experiment

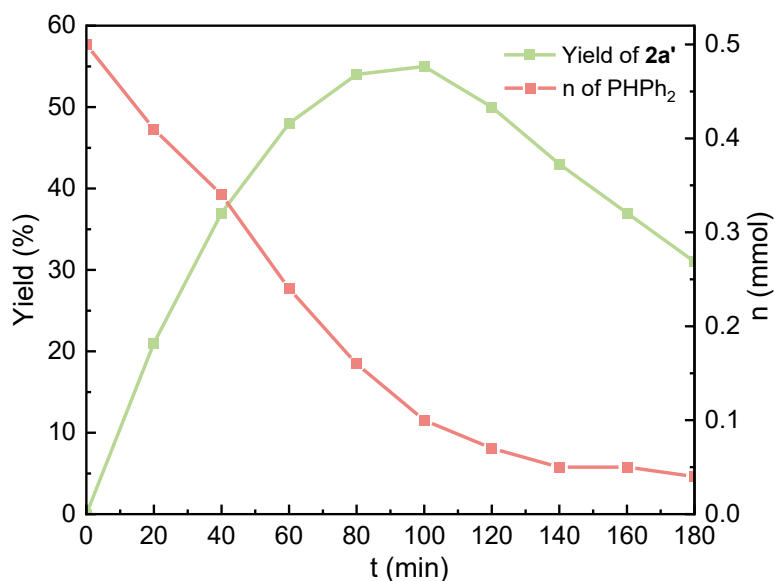

**Fig. S10 Sampling test for P-P bonding reaction**

In an oven-dried undivided tube (25.0 mL) equipped with a stir bar. The tube was equipped with a platinum plate ( $1.5 \times 1.5 \times 0.03 \text{ cm}^3$ ) as the anode and a platinum plate ( $1.5 \times 1.5 \times 0.03 \text{ cm}^3$ ) as the cathode. The distance of electrodes is 0.6 cm. Triphenyl phosphate (81.5 mg, 0.25 mmol), TBAI (36.9 mg, 0.1 mmol) were added. This was followed by the addition of diphenylphosphane (89  $\mu\text{L}$ , 0.5 mmol) and extra dry acetonitrile (10 mL) in a glovebox ( $\text{H}_2\text{O}$  and  $\text{O}_2 < 0.1 \text{ ppm}$ ). Then the mixture was stirred at a constant current of 10.0 mA at 35  $^\circ\text{C}$  for 3 h. The samples were taken into the NMR tubes in the glove box every 20 minutes. Then the samples were subjected to assure  $^{31}\text{P}$  NMR testing. After the testing was finished, the samples were transformed back to the reaction.

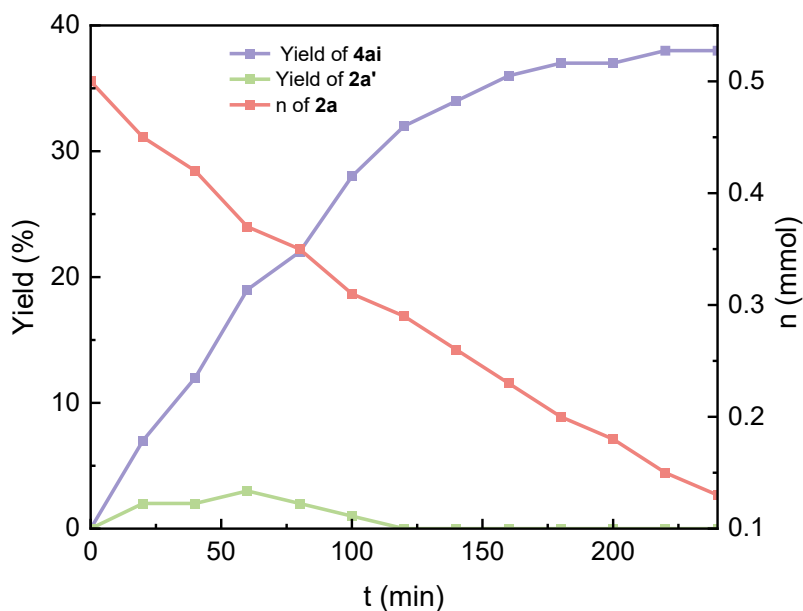

**Fig. S11 Sampling test for P-N bonding reaction**

In an oven-dried undivided tube (25.0 mL) equipped with a stir bar. The tube was equipped with a platinum plate ( $1.5 \times 1.5 \times 0.03 \text{ cm}^3$ ) as the anode and a platinum plate ( $1.5 \times 1.5 \times 0.03 \text{ cm}^3$ ) as the cathode. The distance of electrodes is 0.6 cm. Triphenyl phosphate (81.5 mg, 0.25 mmol),

morpholine (87 mg, 1.0 mmol), TBAI (36.9 mg, 0.1 mmol) were added. This was followed by the addition of diphenylphosphane (89  $\mu$ L, 0.5 mmol) and extra dry acetonitrile (10 mL) in a glovebox ( $\text{H}_2\text{O}$  and  $\text{O}_2 < 0.1$  ppm). Then the mixture was stirred at a constant current of 10.0 mA at 35  $^\circ\text{C}$  for 4 h. The samples were taken into the NMR tubes in the glove box every 20 minutes. Then the samples were subjected to assure  $^{31}\text{P}$  NMR testing. After the testing was finished, the samples were transformed back to the reaction.

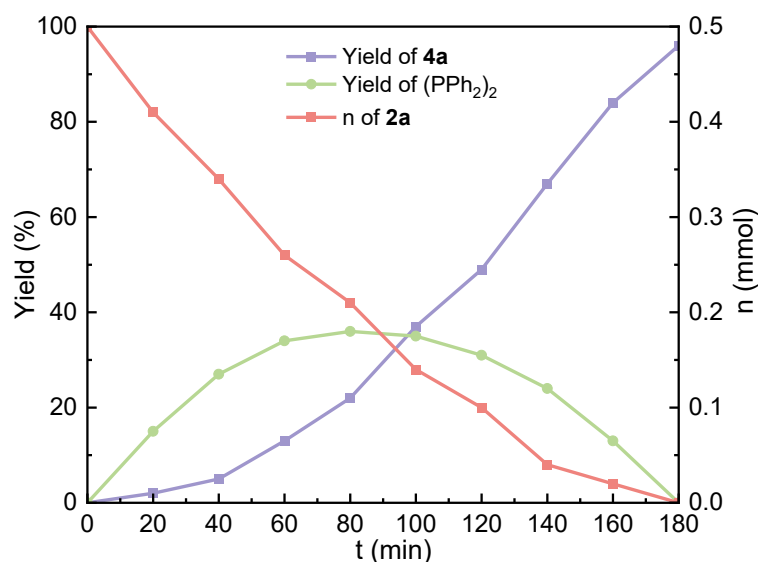

**Fig. S12 Sampling test for P-S bonding reaction**

In an oven-dried undivided tube (25.0 mL) equipped with a stir bar. The tube was equipped with a platinum plate ( $1.5 \times 1.5 \times 0.03$  cm<sup>3</sup>) as the anode and a platinum plate ( $1.5 \times 1.5 \times 0.03$  cm<sup>3</sup>) as the cathode. The distance of electrodes is 0.6 cm. Triphenyl phosphate (81.5 mg, 0.25 mmol), 4-chlorothiophenol (73 mg, 0.5 mmol), TBAI (36.9 mg, 0.1 mmol) were added. This was followed by the addition of diphenylphosphane (89  $\mu$ L, 0.5 mmol) and extra dry acetonitrile (10 mL) in a glovebox ( $\text{H}_2\text{O}$  and  $\text{O}_2 < 0.1$  ppm). Then the mixture was stirred at a constant current of 10.0 mA at 35  $^\circ\text{C}$  for 3 h. The samples were taken into the NMR tubes in the glove box every 20 minutes. Then the samples were subjected to assure  $^{31}\text{P}$  NMR testing. After the testing was finished, the samples were transformed back to the reaction.

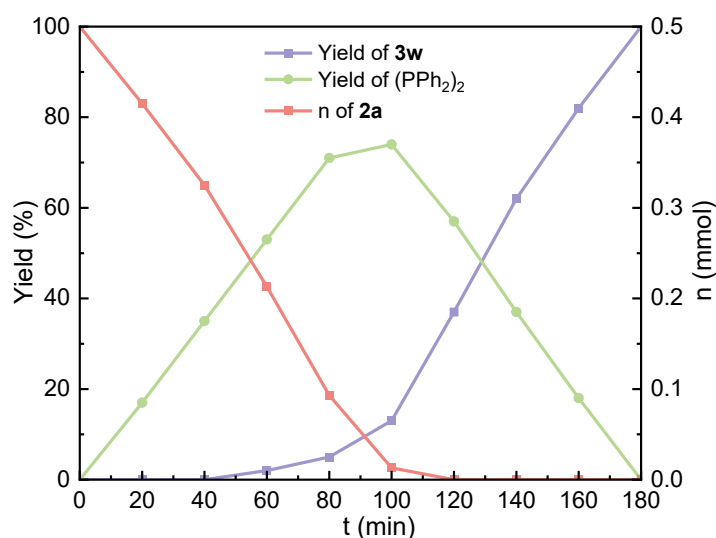

**Fig. S13 Sampling test for P-O bonding reaction**

In an oven-dried undivided tube (25.0 mL) equipped with a stir bar. The tube was equipped with a platinum plate ( $1.5 \times 1.5 \times 0.03 \text{ cm}^3$ ) as the anode and a platinum plate ( $1.5 \times 1.5 \times 0.03 \text{ cm}^3$ ) as the cathode. The distance of electrodes is 0.6 cm. Triphenyl phosphate (81.5 mg, 0.25 mmol), 4-Chlorophenol (128 mg, 1.0 mmol), TBAI (36.9 mg, 0.1 mmol) were added. This was followed by the addition of diphenylphosphane ( $89 \mu\text{L}$ , 0.5 mmol) and extra dry acetonitrile (10 mL) in a glovebox ( $\text{H}_2\text{O}$  and  $\text{O}_2 < 0.1 \text{ ppm}$ ). Then the mixture was stirred at a constant current of 10.0 mA at  $35 \text{ }^\circ\text{C}$  for 3 h. The samples were taken into the NMR tubes in the glove box every 20 minutes. Then the samples were subjected to assure  $^{31}\text{P}$  NMR testing. After the testing was finished, the samples were transformed back to the reaction.

## 8. Experimental Procedures for Electron Paramagnetic Resonance

### (EPR) Experiment

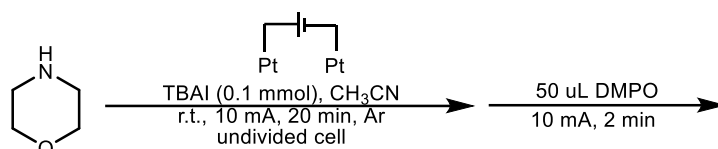

**Fig. S14 EPR testing of nitrogen radicals**

The adduct of nitrogen radical to DMPO

In an oven-dried undivided tube (25.0 mL) equipped with a stir bar. The tube was equipped with two platinum plate ( $1.5 \times 1.5 \times 0.03 \text{ cm}^3$ ) as the cathode and the anode. The distance of electrodes is 0.6 cm.  $^t\text{Bu}_4\text{NBF}_4$  (32.9 mg, 0.1 mmol) were added. This was followed by the addition of morpholine ( $87 \mu\text{L}$ , 1.0 mmol) and extra dry acetonitrile (10 mL) in a glovebox ( $\text{H}_2\text{O}$  and  $\text{O}_2 < 0.1 \text{ ppm}$ ). The mixture was stirred at a constant current of 10.0 mA at  $25 \text{ }^\circ\text{C}$  for 5 minutes. After that, 50  $\mu\text{L}$  DMPO was added and electrolysis for 5 minutes. After that, an aliquot was taken for EPR analysis.

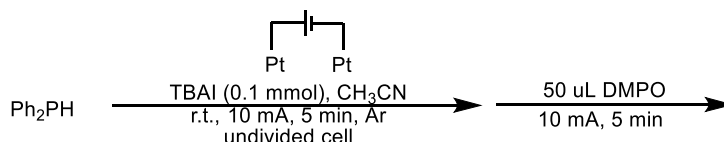

**Fig. S15 EPR testing of phosphine radicals**

The adduct of phosphorus radical to DMPO

In an oven-dried undivided tube (25.0 mL) equipped with a stir bar. The tube was equipped with two platinum plate ( $1.5 \times 1.5 \times 0.03 \text{ cm}^3$ ) as the cathode and the anode. The distance of electrodes is 0.6 cm.  $^t\text{Bu}_4\text{NI}$  (36.9 mg, 0.1 mmol) were added. This was followed by the addition of diphenylphosphane ( $89 \mu\text{L}$ , 0.5 mmol) and extra dry acetonitrile (10 mL) in a glovebox ( $\text{H}_2\text{O}$  and  $\text{O}_2 < 0.1 \text{ ppm}$ ). The mixture was stirred at a constant current of 10.0 mA at  $25 \text{ }^\circ\text{C}$  for 5 minutes. After that, 50  $\mu\text{L}$  DMPO was added and electrolysis for 5 minutes. After that, an aliquot was taken for EPR analysis.

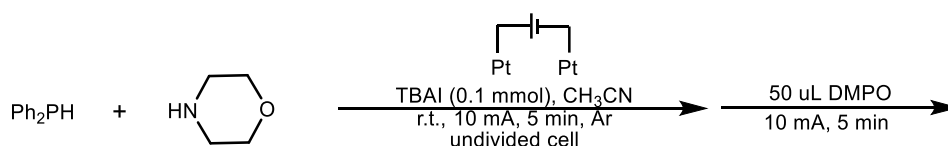

**Fig. S16 EPR testing of phosphorus free radicals in the presence of morpholine**

The adduct of phosphorus radical to DMPO

In an oven-dried undivided tube (25.0 mL) equipped with a stir bar. The tube was equipped with two platinum plate ( $1.5 \times 1.5 \times 0.03 \text{ cm}^3$ ) as the cathode and the anode. The distance of electrodes is 0.6 cm.  ${}^n\text{Bu}_4\text{NI}$  (36.9 mg, 0.1 mmol) were added. This was followed by the addition of diphenylphosphane (89  $\mu\text{L}$ , 0.5 mmol), morpholine (87  $\mu\text{L}$ , 1.0 mmol) and extra dry acetonitrile (10 mL) in a glovebox ( $\text{H}_2\text{O}$  and  $\text{O}_2 < 0.1 \text{ ppm}$ ). The mixture was stirred at a constant current of 10.0 mA at 25  $^\circ\text{C}$  for 5 minutes. After that, 50  $\mu\text{L}$  DMPO was added and electrolysis for 5 minutes. After that, an aliquot was taken for EPR analysis.

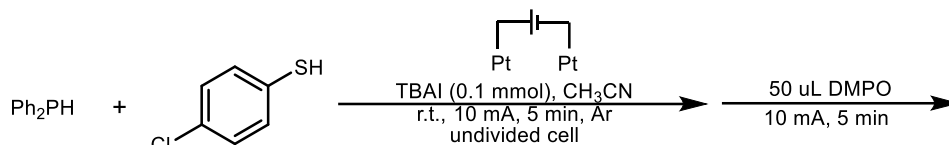

**Fig. S17 EPR testing of phosphorus radicals in the presence of 4-chlorothiophenol**

The adduct of phosphorus radical to DMPO

In an oven-dried undivided tube (25.0 mL) equipped with a stir bar. The tube was equipped with two platinum plate ( $1.5 \times 1.5 \times 0.03 \text{ cm}^3$ ) as the cathode and the anode. The distance of electrodes is 0.6 cm.  ${}^n\text{Bu}_4\text{NI}$  (36.9 mg, 0.1 mmol) were added. This was followed by the addition of diphenylphosphane (89  $\mu\text{L}$ , 0.5 mmol), 4-chlorothiophenol (72.3 mg, 0.5 mmol) and extra dry acetonitrile (10 mL) in a glovebox ( $\text{H}_2\text{O}$  and  $\text{O}_2 < 0.1 \text{ ppm}$ ). The mixture was stirred at a constant current of 10.0 mA at 25  $^\circ\text{C}$  for 5 minutes. After that, 50  $\mu\text{L}$  DMPO was added and electrolysis for 5 minutes. After that, an aliquot was taken for EPR analysis.

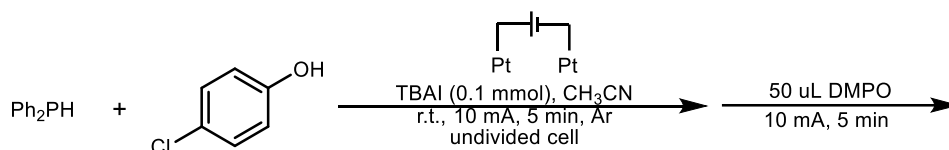

**Fig. S18 EPR testing of phosphorus radicals in the presence of 4-chlorophenol**

The adduct of phosphorus radical to DMPO

In an oven-dried undivided tube (25.0 mL) equipped with a stir bar. The tube was equipped with two platinum plate ( $1.5 \times 1.5 \times 0.03 \text{ cm}^3$ ) as the cathode and the anode. The distance of electrodes is 0.6 cm.  ${}^n\text{Bu}_4\text{NI}$  (36.9 mg, 0.1 mmol) were added. This was followed by the addition of diphenylphosphane (89  $\mu\text{L}$ , 0.5 mmol), 4-chlorophenol (128 mg, 1.0 mmol) and extra dry acetonitrile (10 mL) in a glovebox ( $\text{H}_2\text{O}$  and  $\text{O}_2 < 0.1 \text{ ppm}$ ). The mixture was stirred at a constant current of 10.0 mA at 25  $^\circ\text{C}$  for 5 minutes. After that, 50  $\mu\text{L}$  DMPO was added and electrolysis for 5 minutes. After that, an aliquot was taken for EPR analysis.

## 9. Experimental Procedures for Radical Capture Experiment

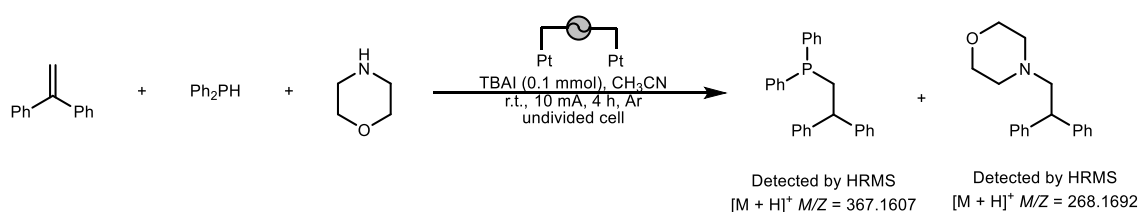

**Fig. S19 Radical capture experiment**

In an oven-dried undivided tube (25.0 mL) equipped with a stir bar. The tube was equipped with a platinum plate ( $1.5 \times 1.5 \times 0.03 \text{ cm}^3$ ) as the anode and a platinum plate ( $1.5 \times 1.5 \times 0.03 \text{ cm}^3$ ) as the cathode. The distance of electrodes is 0.6 cm. 1,1-Diphenylethylene (180  $\mu\text{L}$ , 1.0 mmol), morpholine (87  $\mu\text{L}$ , 1.0 mmol), TBAI (36.9 mg, 0.1 mmol) were added. This was followed by the addition of diphenylphosphane (**2a**, 0.5 mmol) and extra dry acetonitrile (10 mL) in a glovebox ( $\text{H}_2\text{O}$  and  $\text{O}_2 < 0.1 \text{ ppm}$ ). Then the mixture was stirred at a constant current of 10.0 mA at 35 °C for 3 h ( $J = 4.4 \text{ mA/cm}^2$ , 2.2 F/mol). After the reaction was completed, the product was detected by HRMS.

## 10. Experimental Procedures for Operando EC-MS

### 10.1. Reagents and materials

Unless otherwise noted, materials were obtained from commercial suppliers and used without further purification. Platinum wire ( $\phi$ : 0.1 mm). The borosilicate glass tube (O.D.: 1.5 mm, I.D.: 0.86 mm, Length: 10 cm) was purchased from SUTTER Instrument Co., Ltd., USA.

### 10.2. Electrospray ionization source emitters

Electrospray ionization source (ESI) emitters were pulled from borosilicate glass tube by using a P-97 microelectrode puller (Sutter Instrument, Co., Ltd., USA). For the parameters optimization and performance evaluation experiments, emitter with tip diameter of ca. 20  $\mu\text{m}$  was used. The pulling parameters for this emitter are as follows:

$$\text{HEAT} = 529, \text{PULL} = 10, \text{VEL} = 11, \text{TIME} = 250, \text{P} = 500$$

### 10.3. Mass spectrometry

MS data were acquired by LTQ Velos Orbitrap Elite mass spectrometer (Thermo Fisher Scientific Co., Ltd., USA). The temperature of the ion transmission tube was set to 275°C; the energy of the S-lens was set to 60%; the number of micro scan was set to 1. MS/MS data were acquired by setting isolation window at 1.0 Da and normalized collision energies from 20 to 35 (units were defined by the instrument manufacturer, the collision gas was helium). The resolution of MS was set to 60000. All MS data were analyzed through the Qual browser (Xcalibur workstation, version 4.2.47). The spray voltage was supplied by a high voltage power supply (Dongwen High Voltage Power Supply Co., Ltd., Tianjin). Both the mass spectrometer and the external high voltage power supply were well grounded.

### 10.4. Online electrochemical reactions

Herein, we employ the FE-ESI (floating electrochemical electrospray ionization) device to achieve real-time monitoring of the reaction process. Based on the original setup, a potential controller was integrated, enabling the device to stably provide a broad output voltage range from  $-12 \text{ V}$  to  $+12 \text{ V}$  under floating conditions, with a voltage regulation precision reaching 1 mV. A photograph of the actual device is shown in Figure S19. Ag/AgCl was used as the reference electrode, a platinum wire as the counter electrode, and a platinum wire as the counter electrode as the working electrode. (It is important to note that the platinum wire of the counter electrode and working electrode should be sleeved with a polyimide capillary tube (I.D. 150  $\mu\text{m}$ , O.D. 365  $\mu\text{m}$ ) to prevent a short circuit with the reference electrode.) The distance between the working electrode, reference electrode, and counter electrode was maintained at 2 mm. We had placed WE very close ( $\approx 200 \mu\text{m}$ ) to the exit of the emitter (O.D.  $\approx 20 \mu\text{m}$ ) to ensure electrode reaction products transferred to MS quickly. The spray voltage was set at 1.5~2.5 kV. The parameter settings for the floating electrochemical system were as follows: The electrochemical method adopts a rapid output mode at

constant potential, with the potential set at 0 V from 0 to 0.4 minutes, 0.6 V from 0.4 to 0.8 minutes, and 1 V from 0.8 to 1.2 minutes. The application of the electrochemical method and data collection begin 0.2 minutes after the initiation of mass spectrometry data acquisition. Chemical structure of the intermediate was verified by using high resolution tandem mass spectrometry (HRMS).

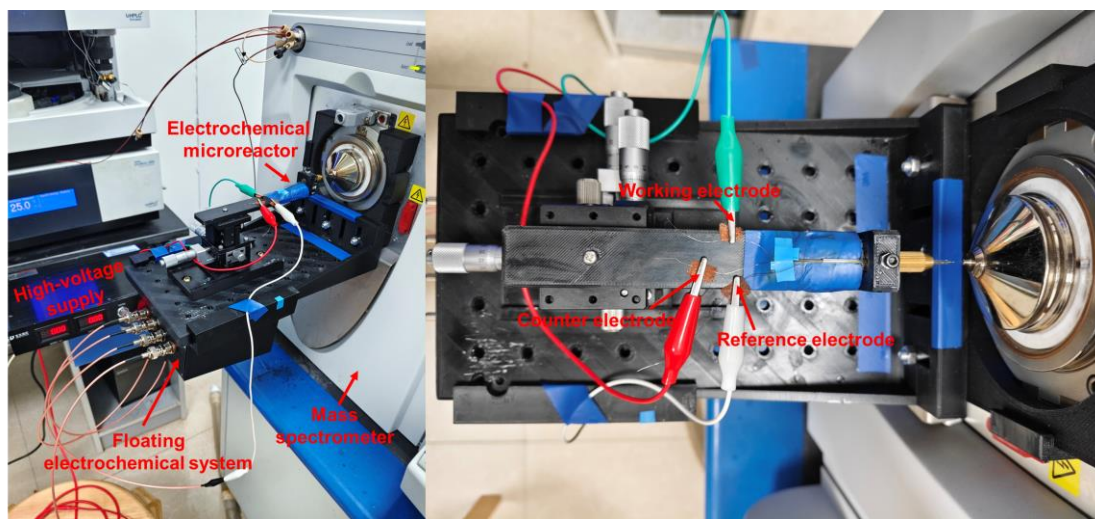

Fig. S20 The full view of the EC-MS platform

### 10.5. EC oxidation of 2a' to 2a'' observed in positive mode HRMS

For the monitoring of EC oxidation of 2a' to 2a'' in positive ESI mode, the solution of MeCN (10.0 mL) containing 1.0 mmol NaI and 0.2 mmol 2a' were loaded into the ESI emitter (Platinum wire ( $\varphi$ : 0.1 mm) as anode, Platinum wire ( $\varphi$ : 0.1 mm) as cathode). The spray voltage was set at 2.5 kV. Chemical structure of the intermediate was verified by using high resolution tandem mass spectrometry (HRMS)

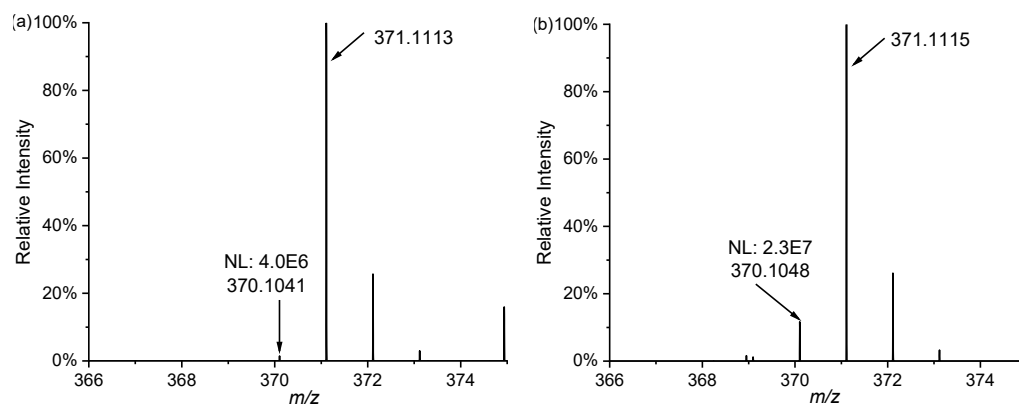

Fig. S21 (a) 1,1,2,2-Tetraphenyldiphosphane high-resolution mass spectrum before electrolysis (control experiment), (b) 1,1,2,2-tetraphenyldiphosphane high-resolution mass spectrum of electrolysis

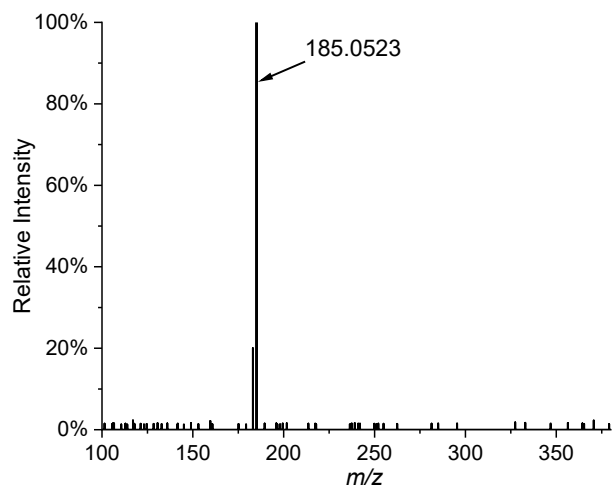

**Fig. S22 tandem MS of the parent ion 185.0523**

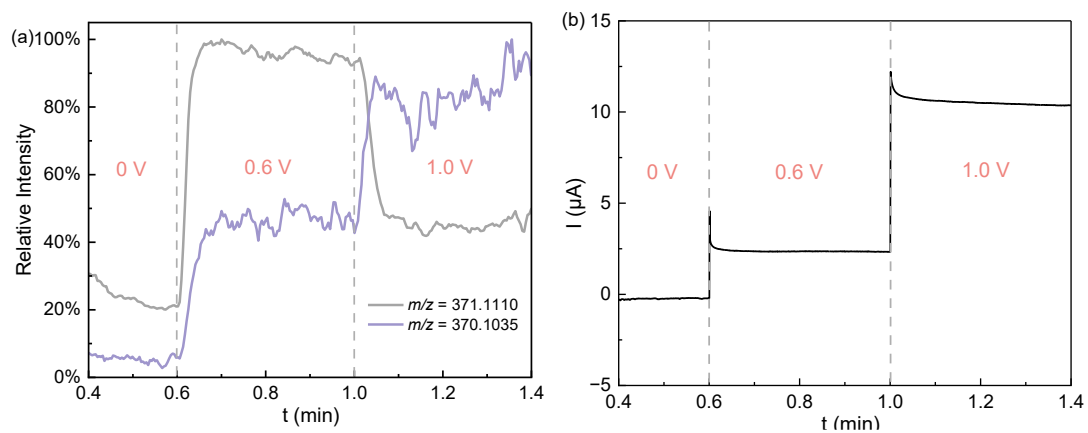

**Fig. S23 (a) Extracted ion chromatograms (EICs) of the 1,1,2,2-tetraphenyldiphosphane ( $[M+H^+]$ ) and 1,1,2,2-tetraphenyldiphosphane radical cations; (b) Current during electrolysis.**

## 11. References

- [1] Ohta, H., Asahara, R., Ikeda, R., Sakamoto, T. & Hayashi, M. A Protocol for the Synthesis of Organophosphorus(V) Compounds with P–N and P–O Bonds by Umpolung Strategy Using Hydroxymethylphosphine Sulfides. *The Journal of Organic Chemistry* **90**, 824-829 (2025). <https://doi.org/10.1021/acs.joc.4c01832>.
- [2] Baranskii, V. A.; Eliseeva, G. D.; Sukhorukova, N. A Bases of reactivity of phosphoryl and thiophosphoryl compounds. *Zhurnal Obshchei Khimii* **58**, 777-83 (1988).
- [3] Li, S. *et al.* Electrochemical Cross-Dehydrogenative Coupling of P(O)–H/P–H Bonds with Heteroatom Nucleophiles: Access to P(O)–N and P(S)–X Compounds. *The Journal of Organic Chemistry* **90**, 8269-8282 (2025). <https://doi.org/10.1021/acs.joc.5c00760>
- [4] Zhang, C.-P., Wang, T.-Z., Yang, Z.-J. & Liang, Y.-F. Manganese Promoted Reductive Cross-Coupling of Phosphine Chlorides with Disulfides for the Synthesis of Thiophosphanes. *Advanced Synthesis & Catalysis* **367**, e202401395 (2025). <https://doi.org/10.1002/adsc.202401395>
- [5] Yoshifuji, M., Hanafusa, F. & Inamoto, N. Synthetic Method of Functionalized Unsymmetrical Sulfides and Disulfides Using Diphenylphosphinodithioates. *Chemistry Letters* **8**, 723-726 (1979). <https://doi.org/10.1246/cl.1979.723>
- [6] Majewski, M. *et al.* Product Subclass 12: Allyllithium Compounds. *Science of Synthesis* **8a**, 1 (2006). <https://doi.org/10.1055/sos-SD-008-00184>
- [7] Ni, H. *et al.* Cyclical palmitoylation regulates TLR9 signalling and systemic autoimmunity in mice. *Nature Communications* **15**, 1 (2024). <https://doi.org/10.1038/s41467-023-43650-z>
- [8] Horner, L., Gehring, R. & Lindel, H. PHOSPHORORGANISCHE VERBINDUNGEN 97: Die Diphenylphosphinyl- und die Diphenylthiophosphinylgruppe als selektive Schutzgruppe für die Mercaptofunktion. Nucleophile Ablösung der Thioloestergruppe aus Thiophosphin-, Thiophosphon- und Thiophosphorsäure-S-estern durch nicht solvatisierte Fluoridionen. *Phosphorus and Sulfur and the Related Elements* **11**, 349-356 (1981). <https://doi.org/10.1080/03086648108077434>
- [9] Murav'ev, I. V.; Fedorovich, I. S. Arylation of the acid halides of di- and triphosphoric acid esters. *Zhurnal Obshchei Khimii* **46**, 789-91 (1976).
- [10] Yamamoto, Y. *et al.* Photoinduced Syntheses and Reactivities of Phosphorus-Containing Interelement Compounds. *The Journal of Organic Chemistry* **85**, 14708-14719 (2020). <https://doi.org/10.1021/acs.joc.0c02014>
- [11] Liu, K. *et al.* Tunable synthesis of chalcophosphinic amides and tertiary phosphinates using tert-butyl N,N-dialkylperoxyamidate. *Organic Chemistry Frontiers* **8**, 4860-4864 (2021). <https://doi.org/10.1039/D1QO00542A>
- [12] Yoshida, S., Igawa, K. & Tomooka, K. Nucleophilic Substitution Reaction at the Nitrogen of Arylsulfonamides with Phosphide Anion. *Journal of the American Chemical Society* **134**, 19358-19361 (2012). <https://doi.org/10.1021/ja309642r>
- [13] Xia, G.-D., Liu, Z.-K., Zhao, Y.-L., Jia, F.-C. & Hu, X.-Q. Radical Phosphorylation of Aliphatic C–H Bonds via Iron Photocatalysis. *Organic Letters* **25**, 5279-5284 (2023). <https://doi.org/10.1021/acs.orglett.3c01824>

## 12. Spectral Data

### O-(3-((diphenylphosphorothioyl)thio)phenyl) diphenylphosphinothioate (**3a'**)

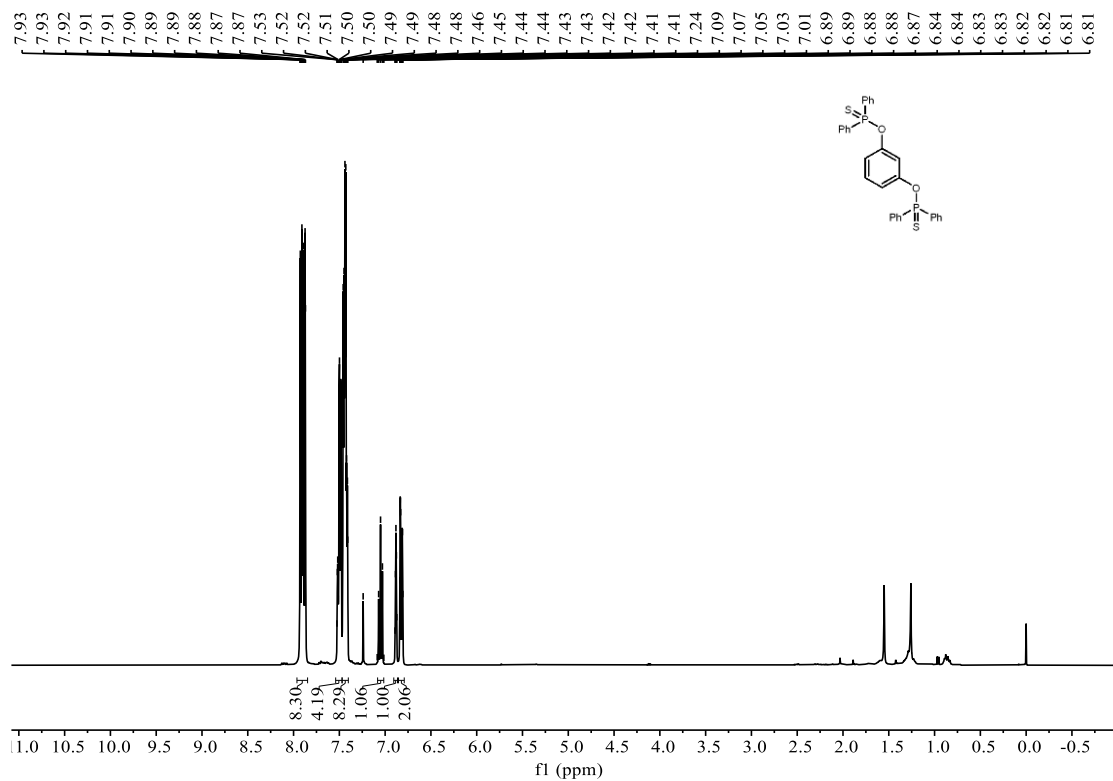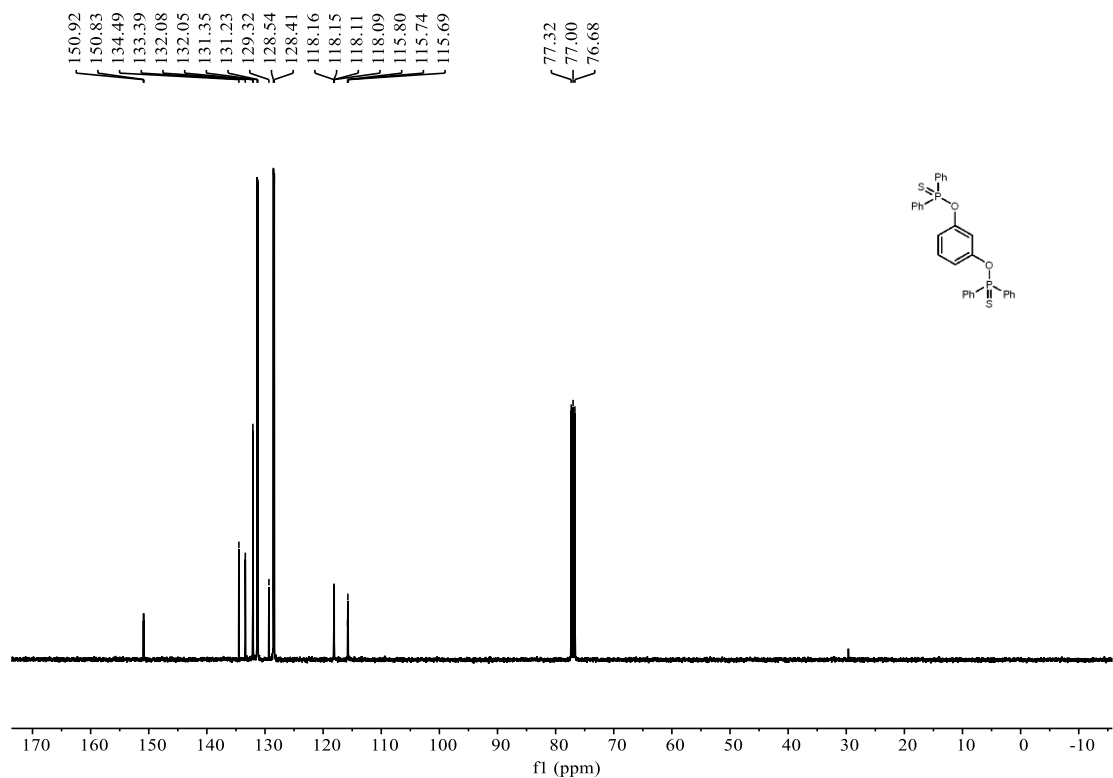

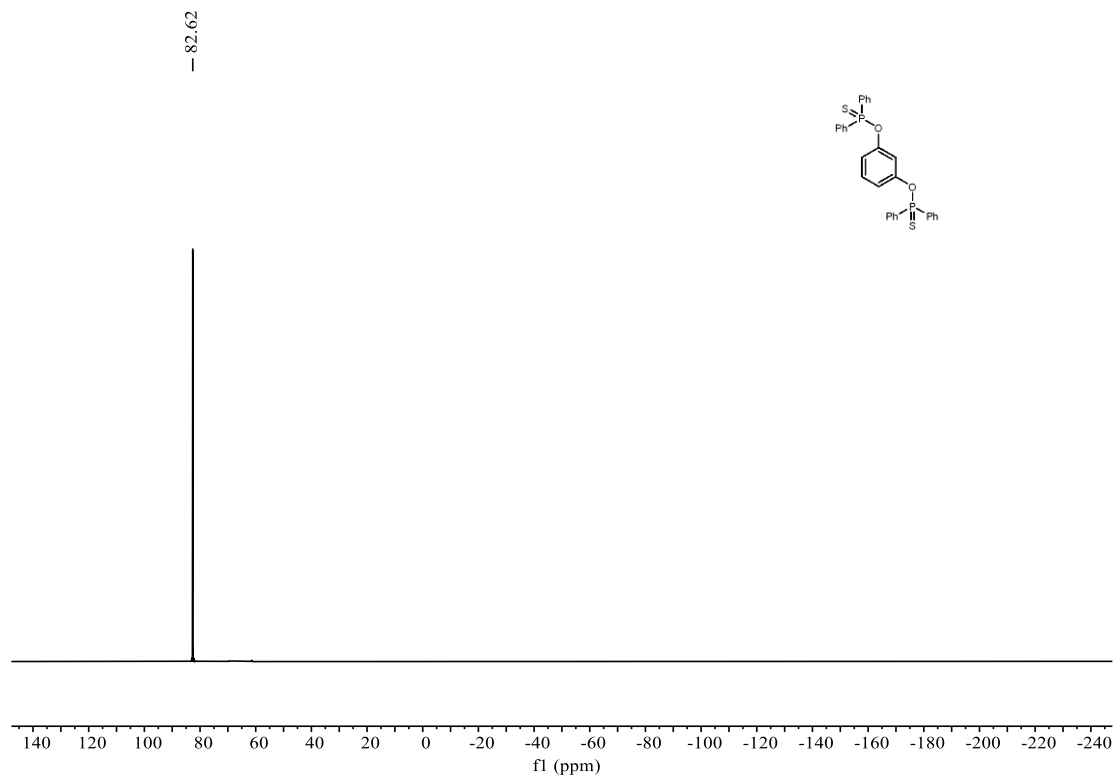

O,O'-(5-methyl-1,3-phenylene) bis(diphenylphosphinothioate) (**3b'**)

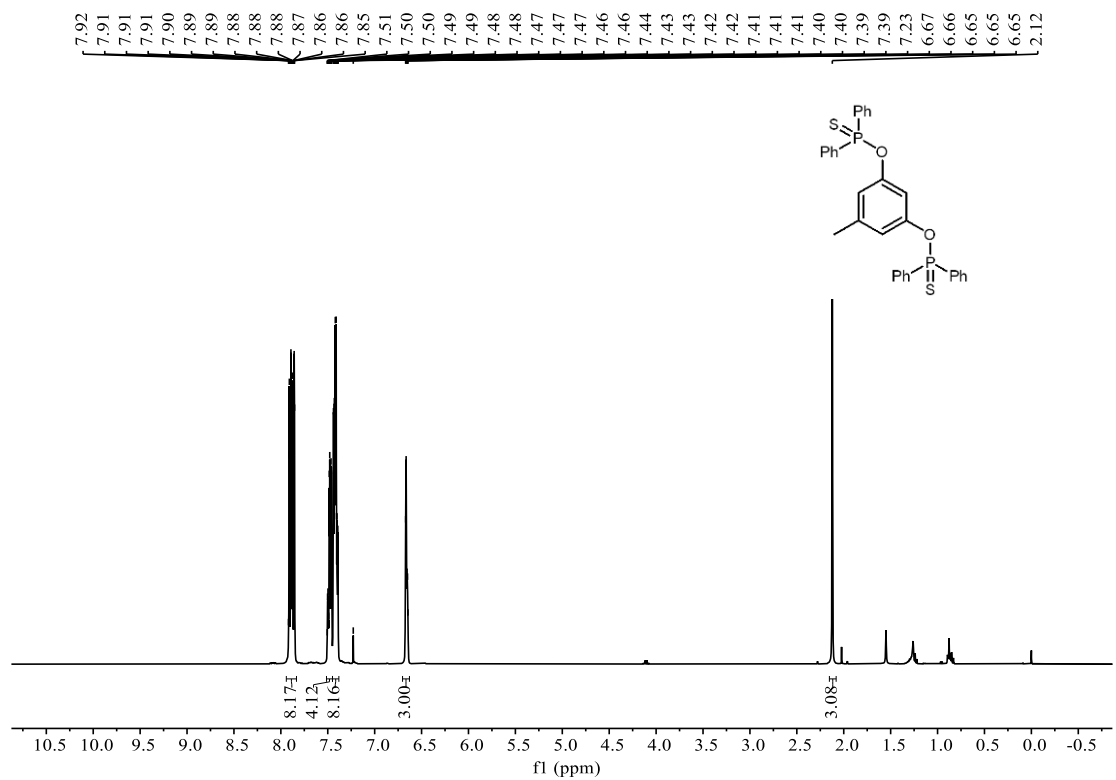

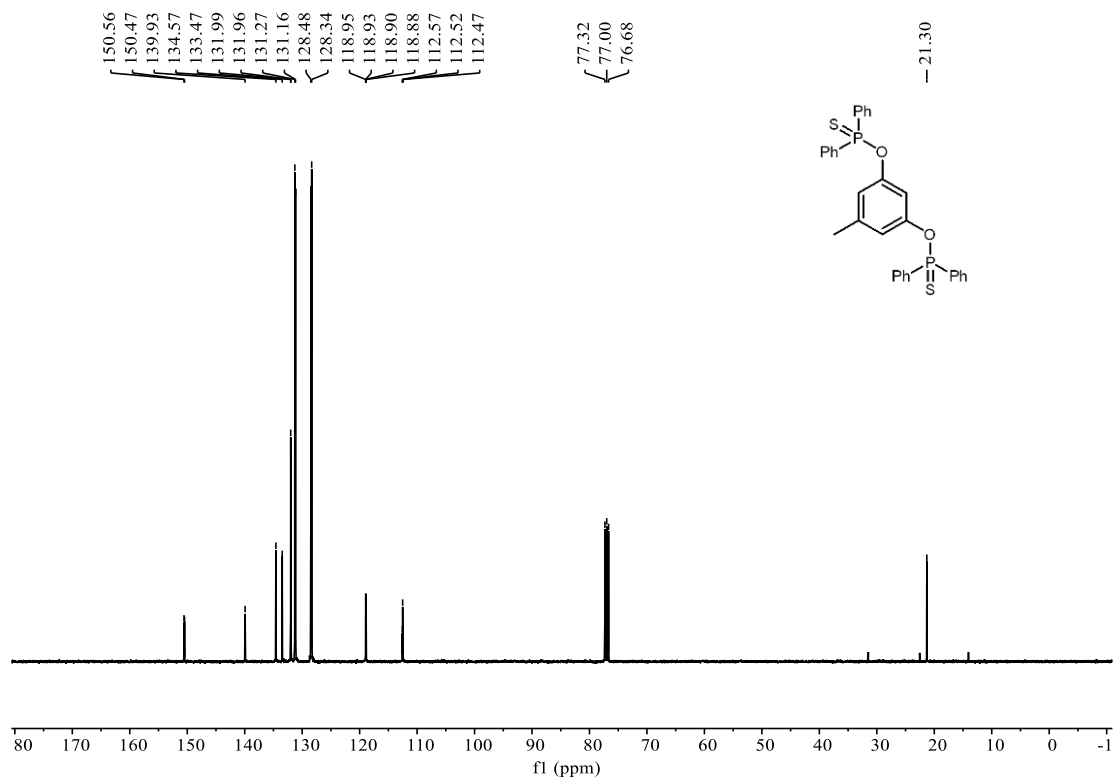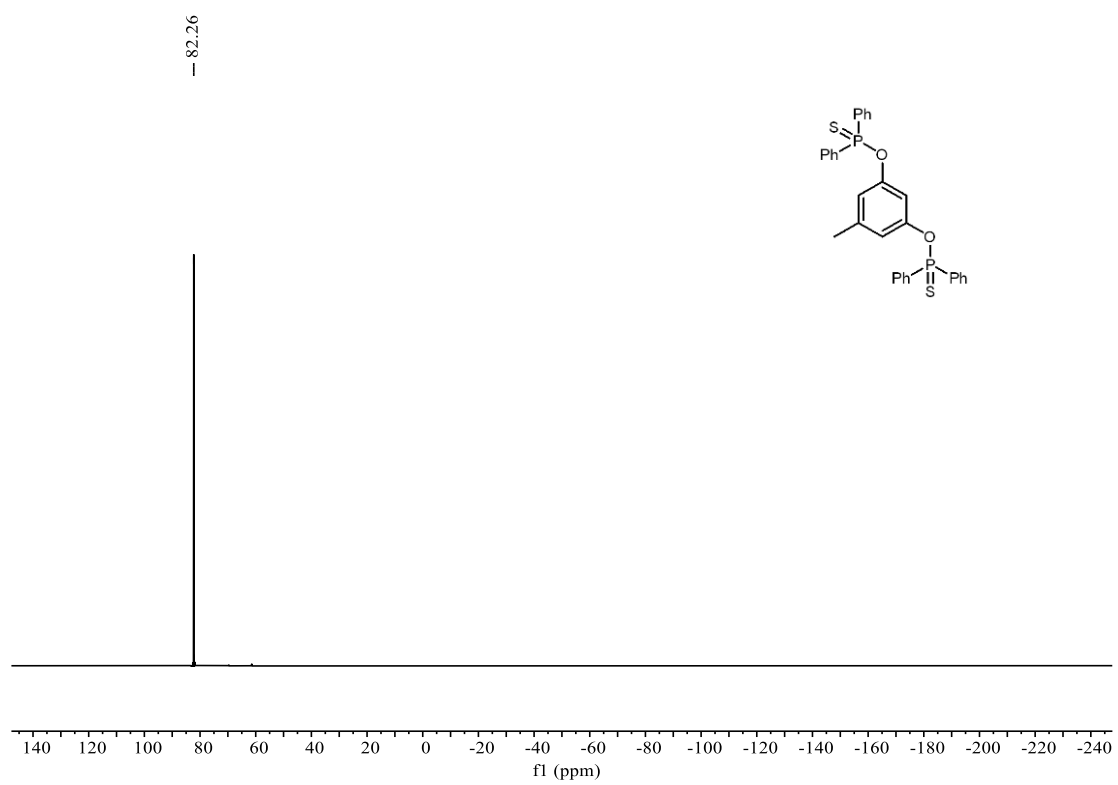

O,O'-(5-cyano-1,3-phenylene) bis(diphenylphosphinothioate) (**3c'**)

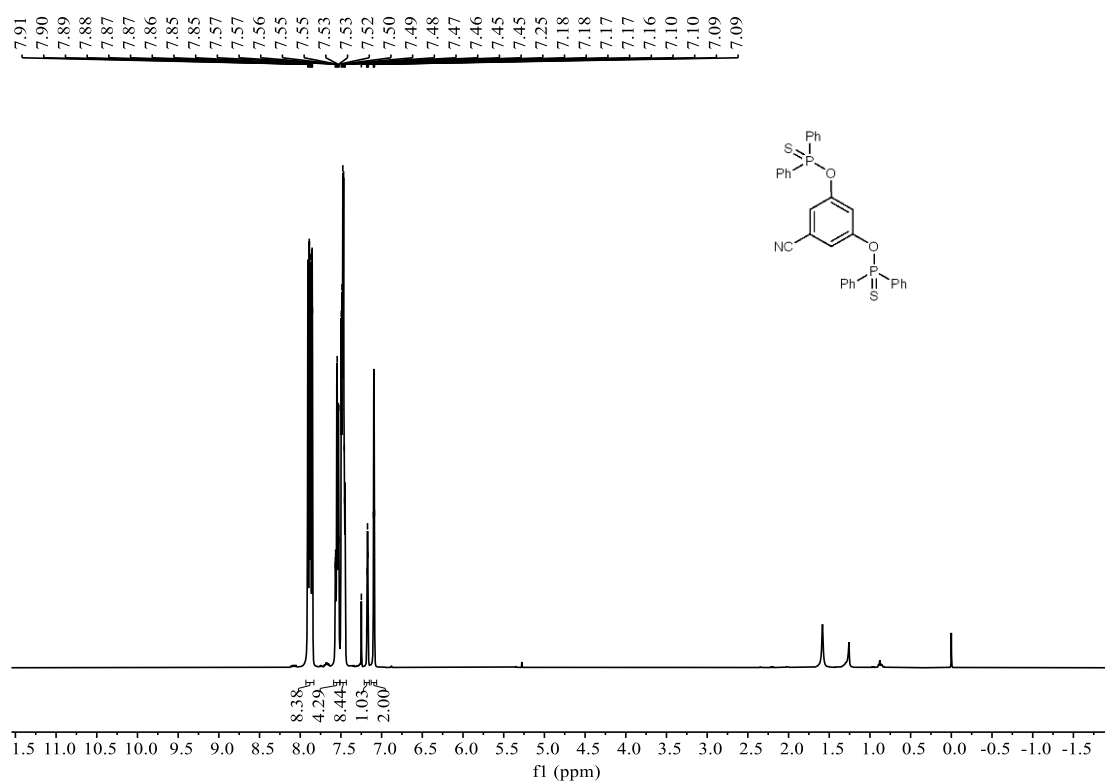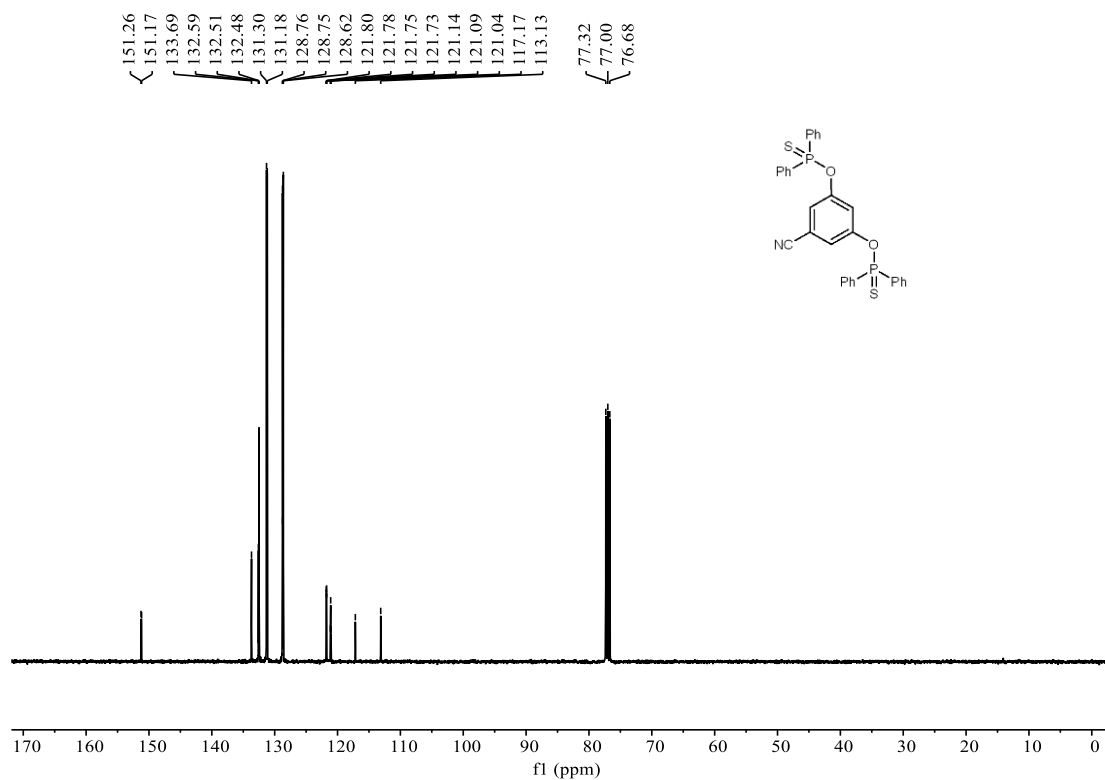

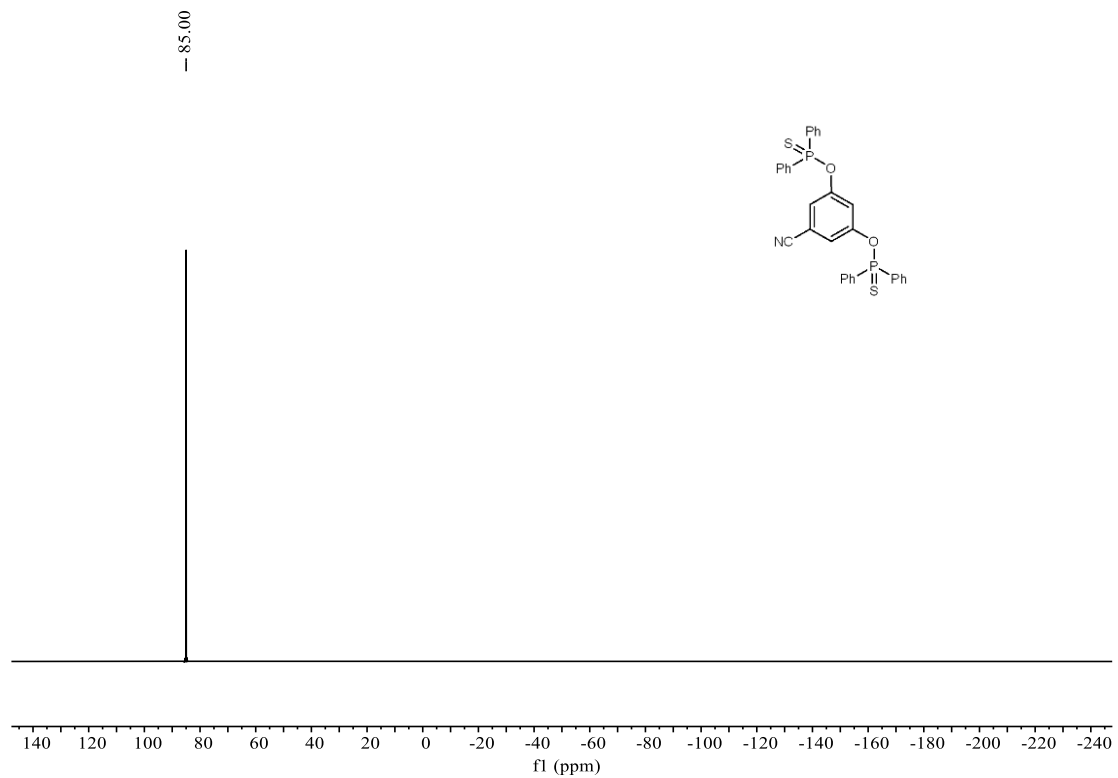

O,O'-(1,2-phenylene) bis(diphenylphosphinothioate) (**3d'**)

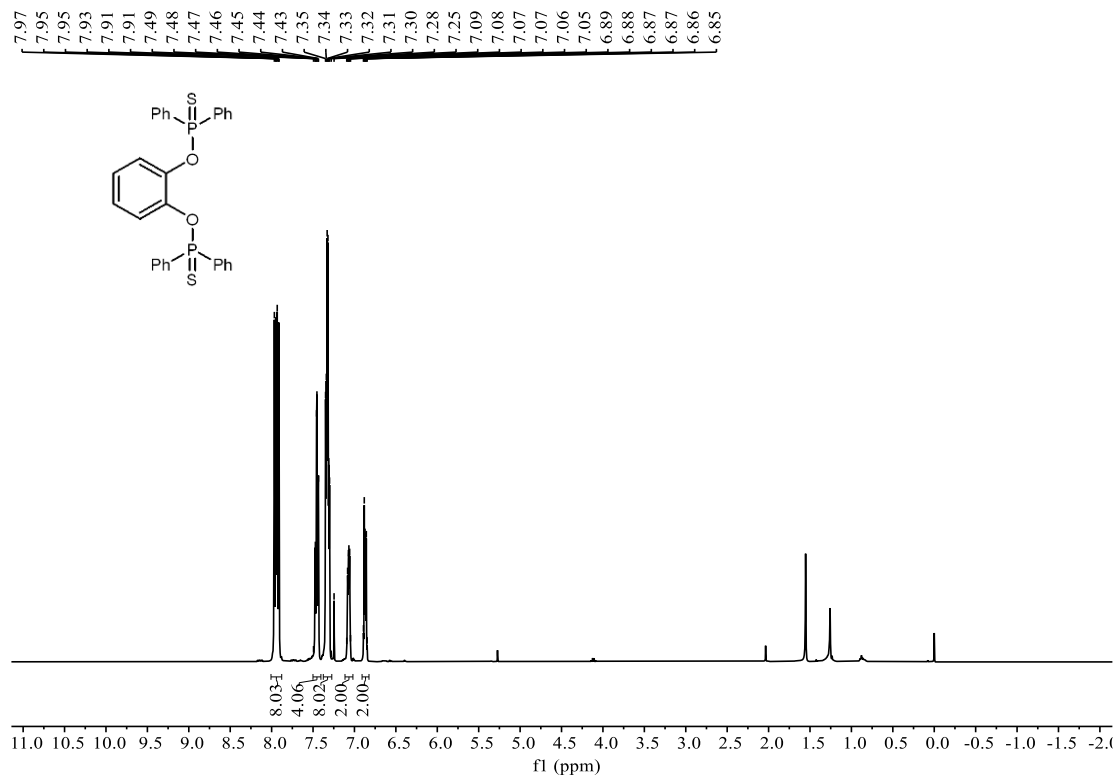

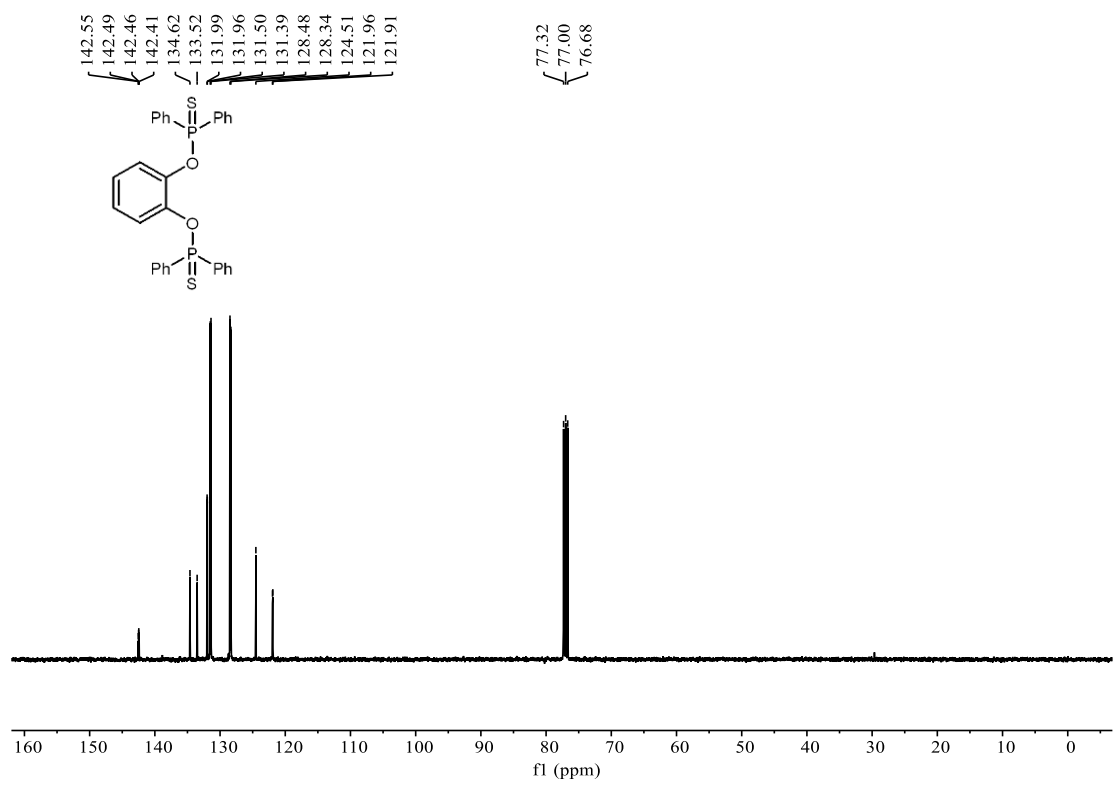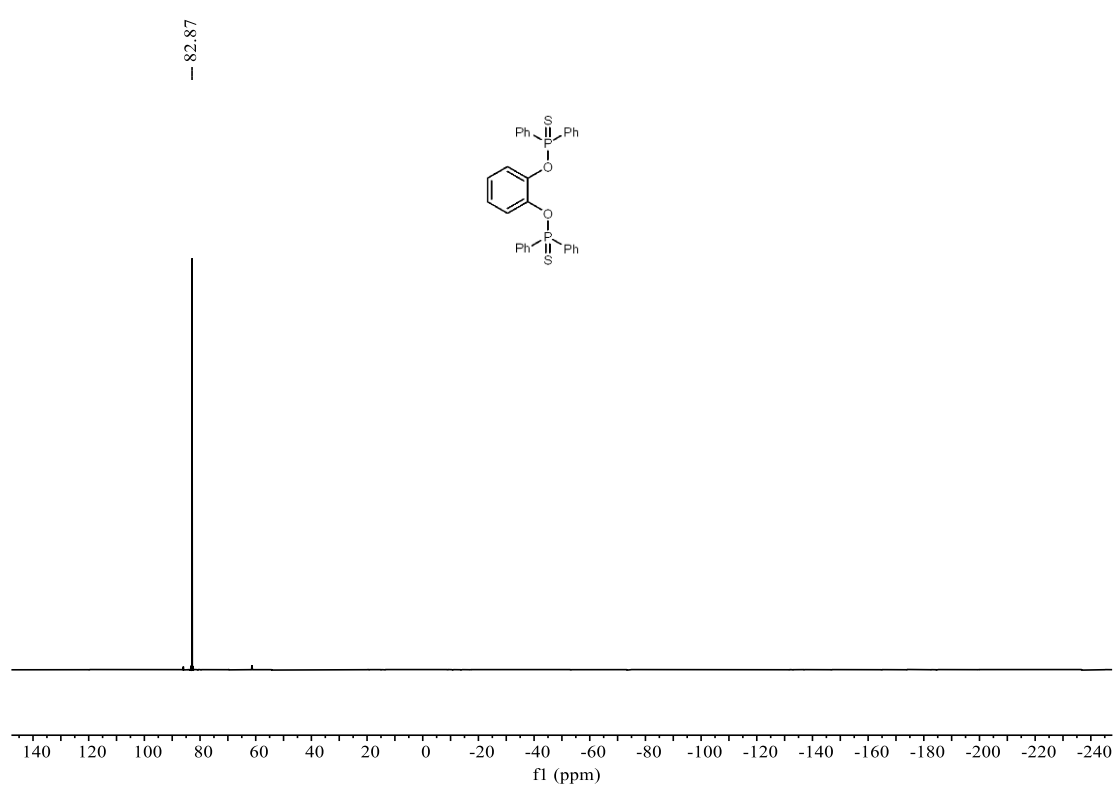

O,O'-(4-methyl-1,2-phenylene) bis(diphenylphosphinothioate) (**3e'**)

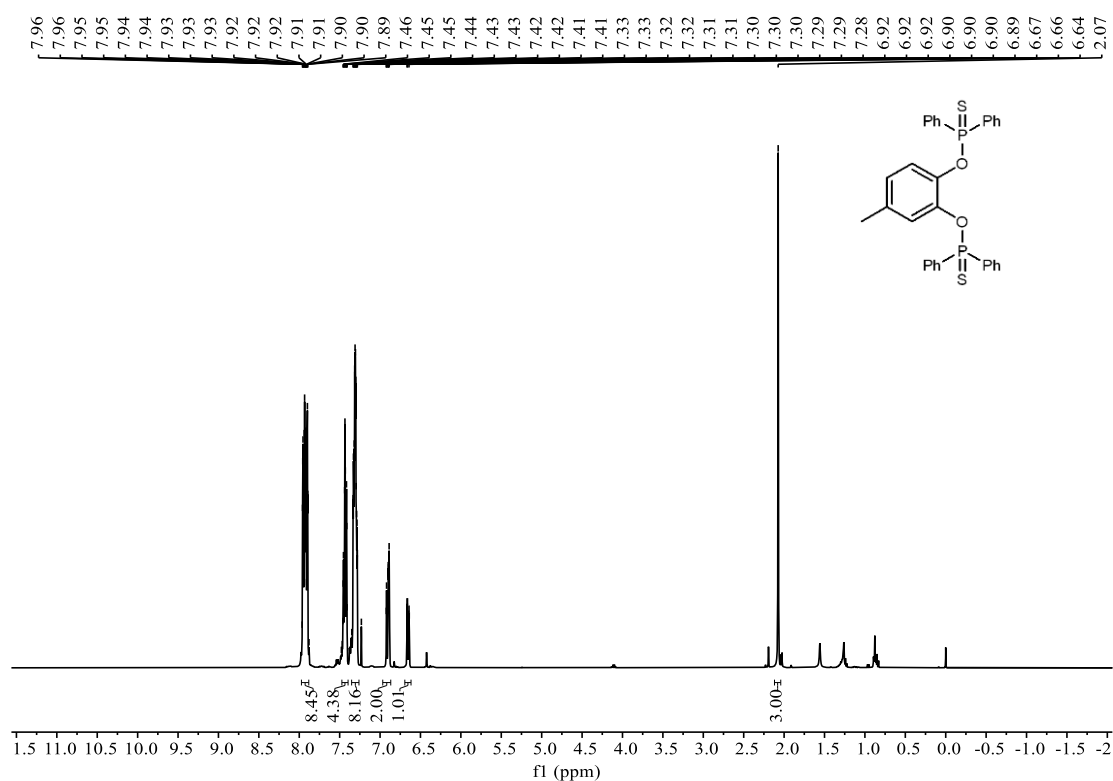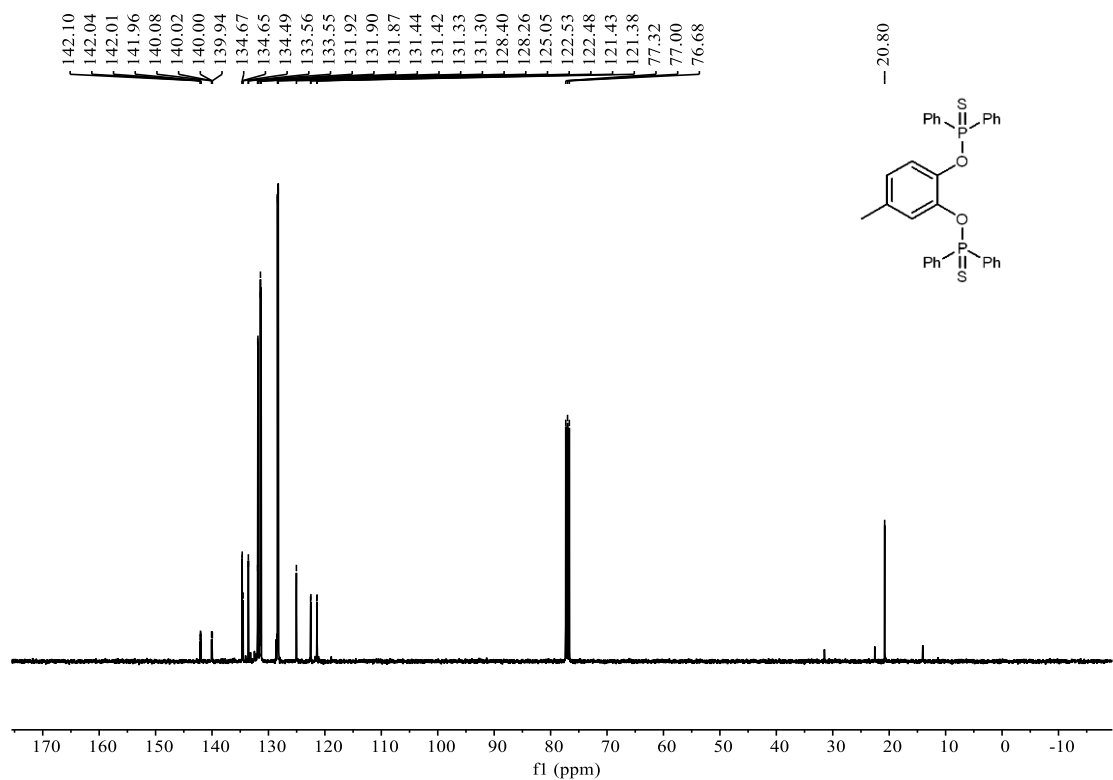

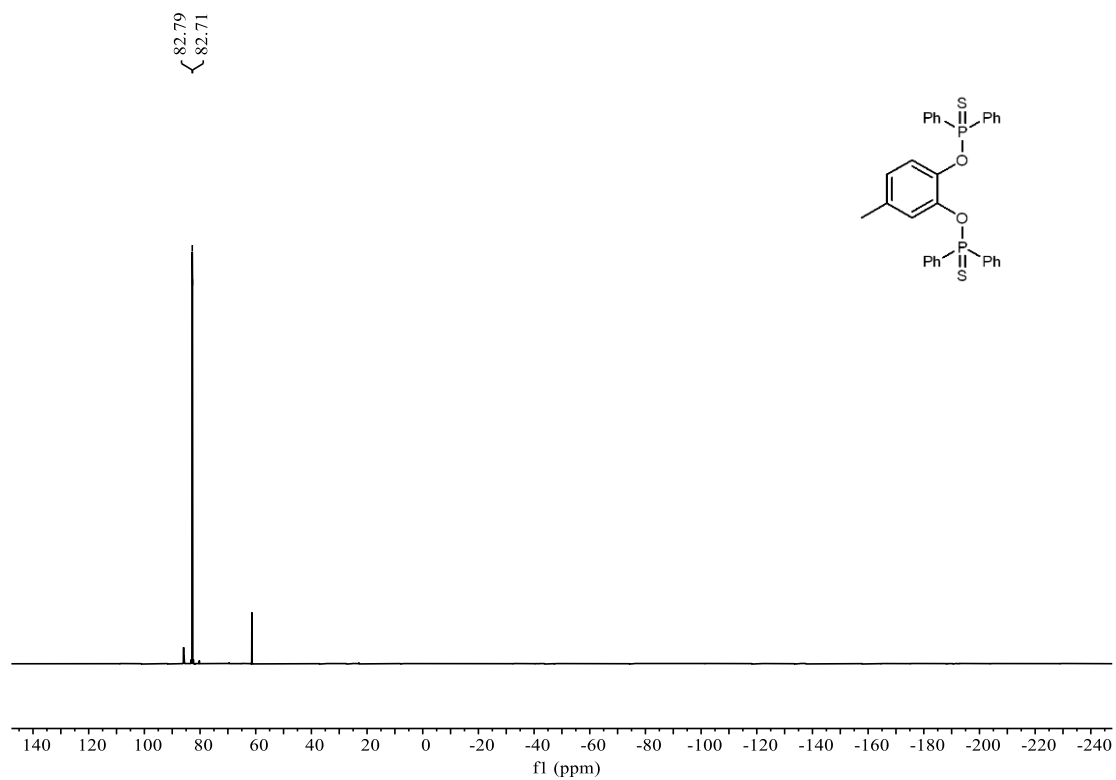

$O,O'$ -(4-(tert-butyl)-1,2-phenylene) bis(diphenylphosphinothioate) (**3f'**)

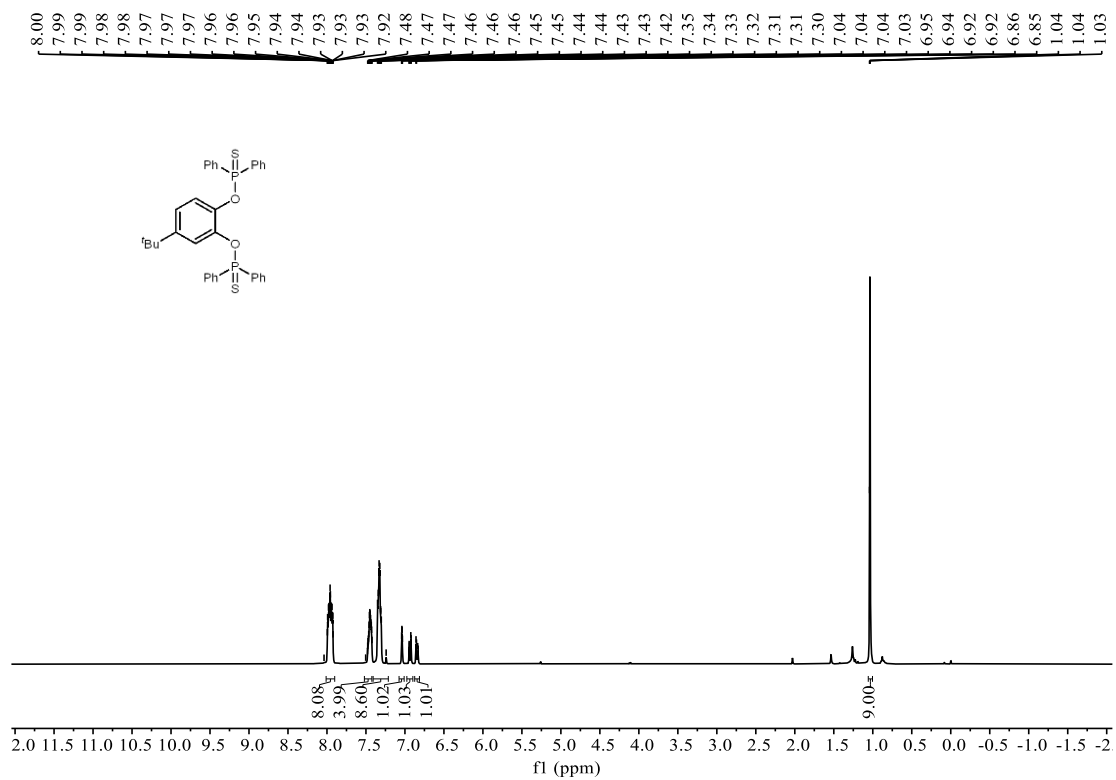

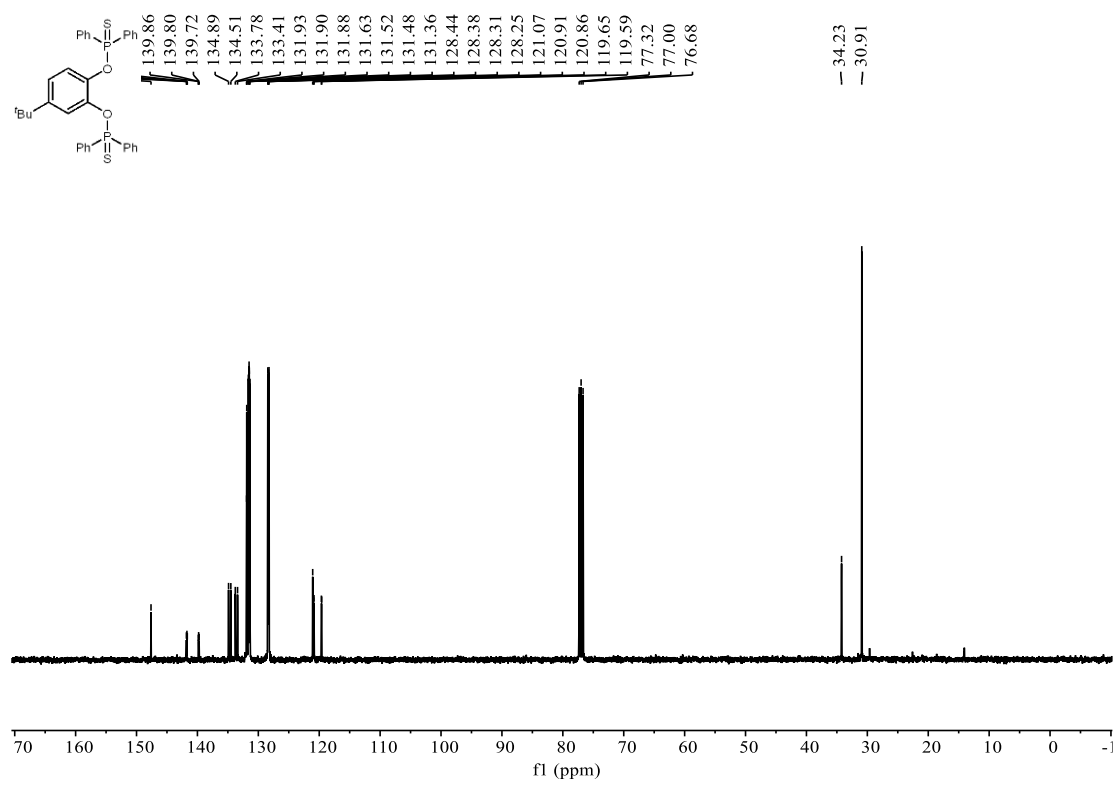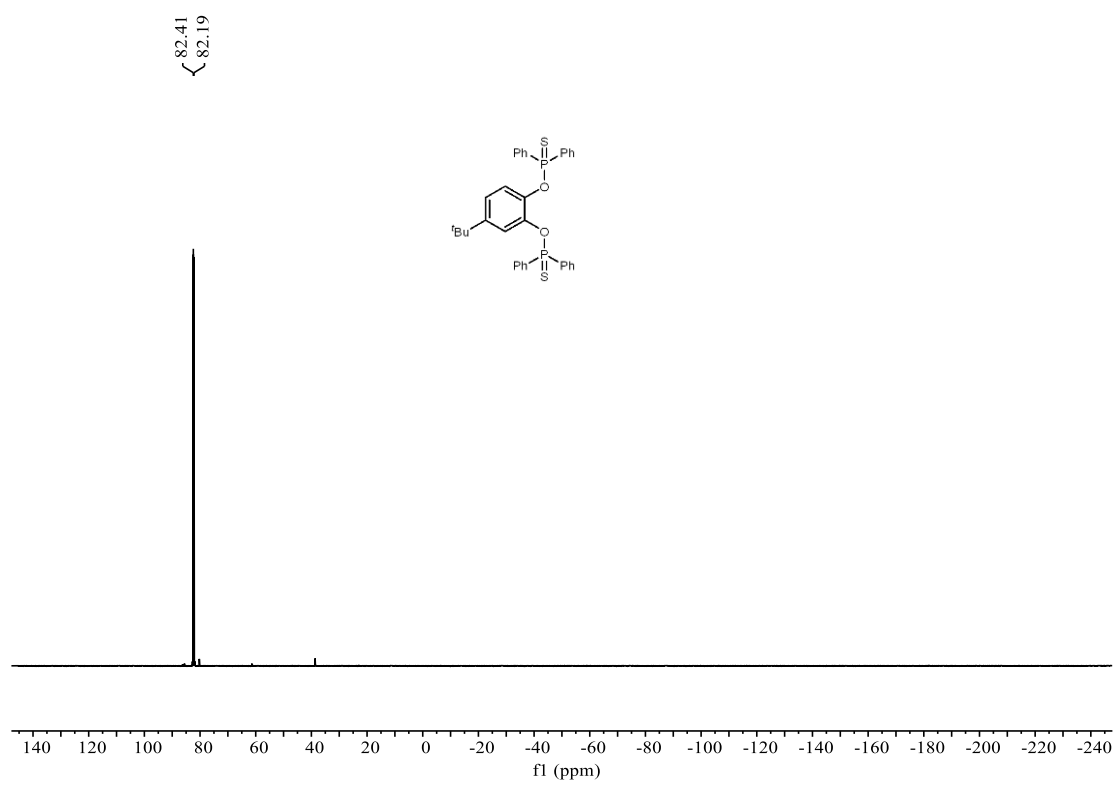

O,O'-(4-chloro-1,2-phenylene) bis(diphenylphosphinothioate) (**3g'**)

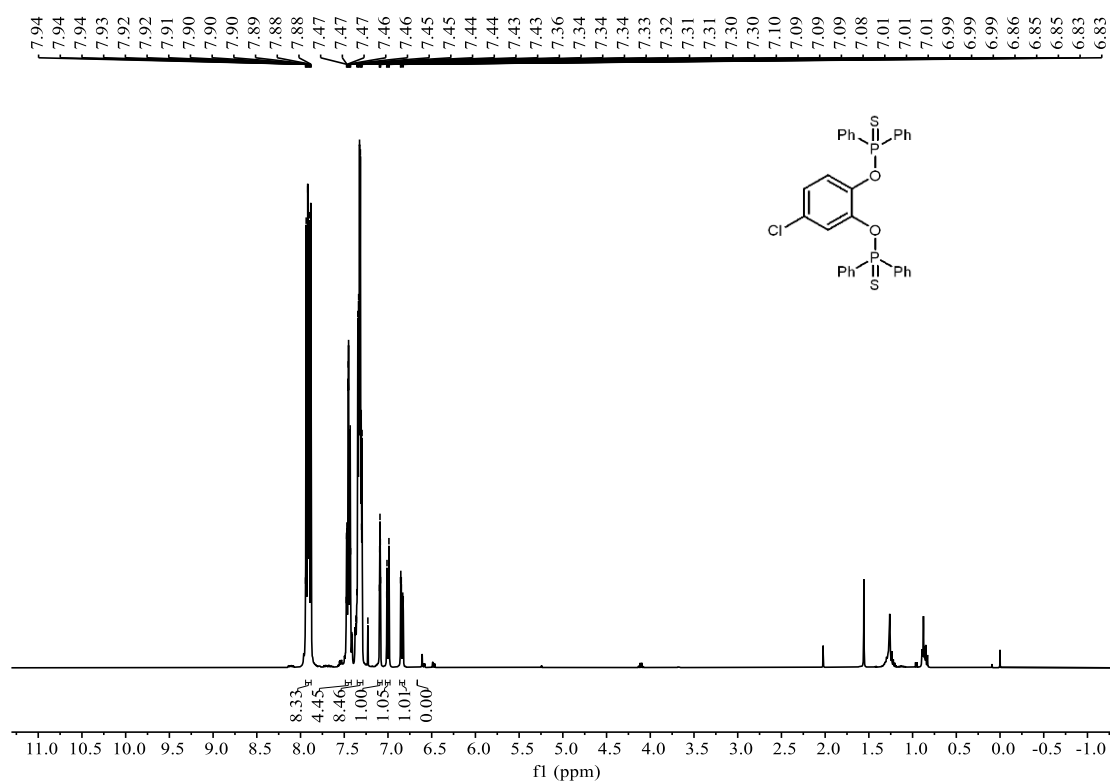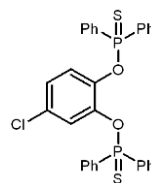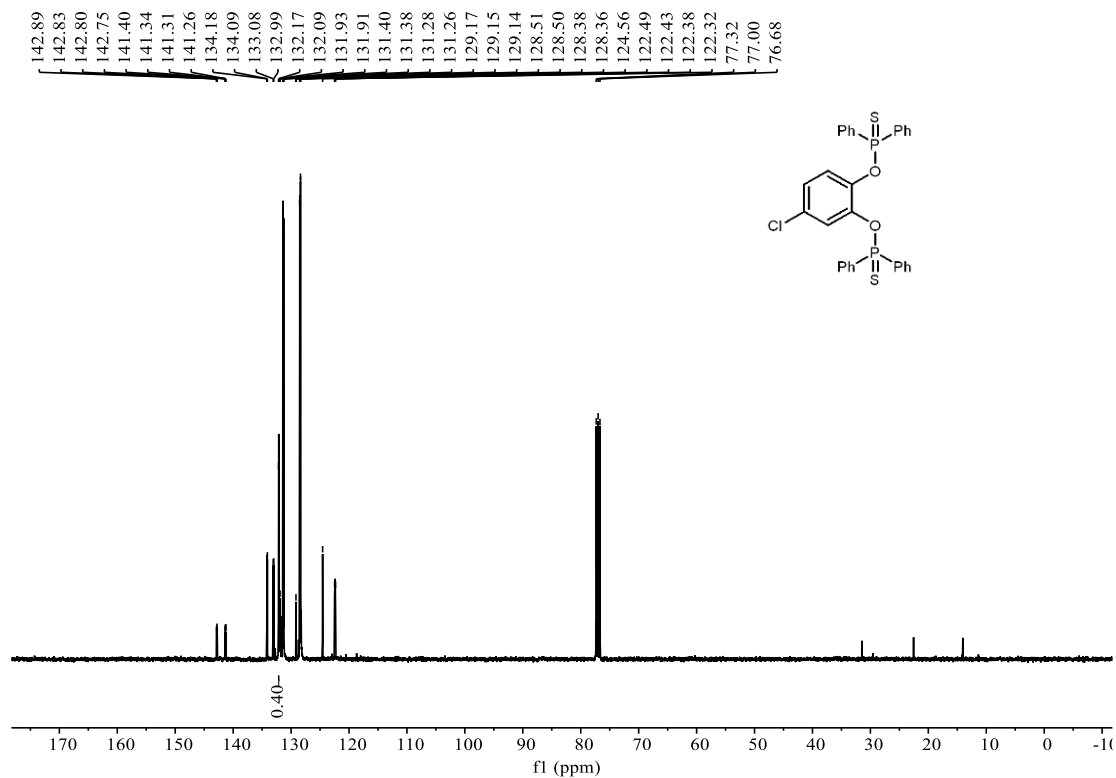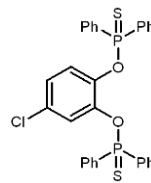

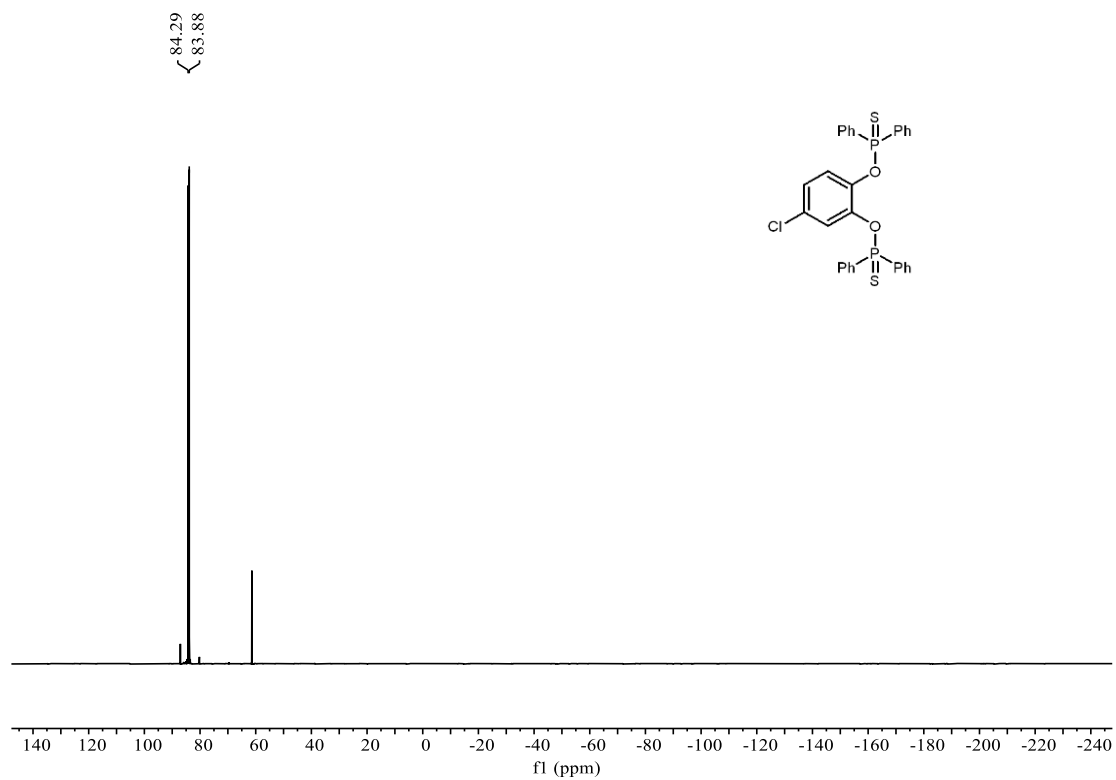

O,O'-(4-cyano-1,2-phenylene) bis(diphenylphosphinothioate) (**3h'**)

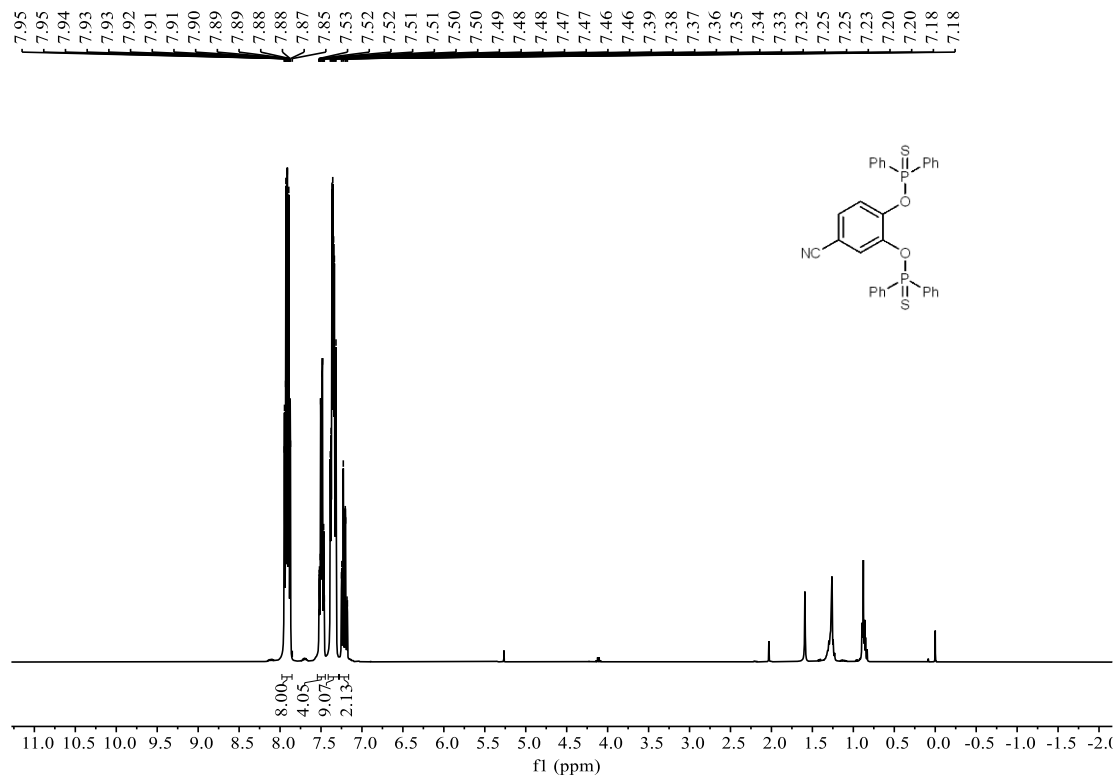

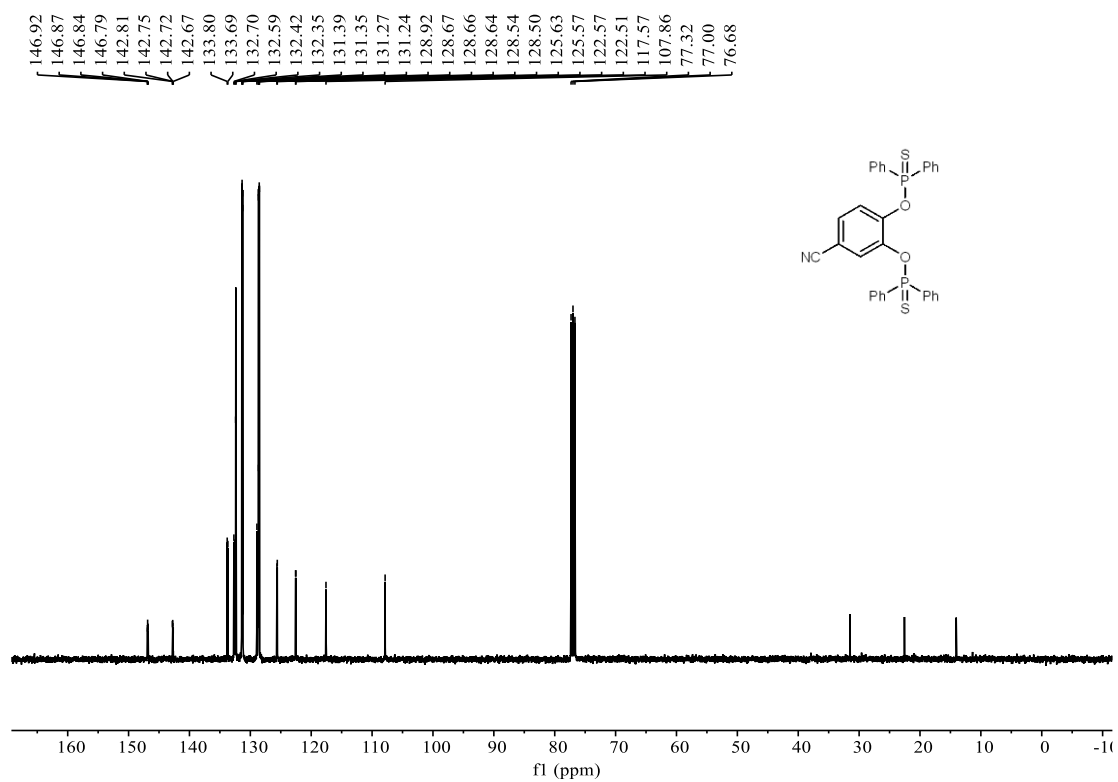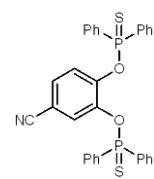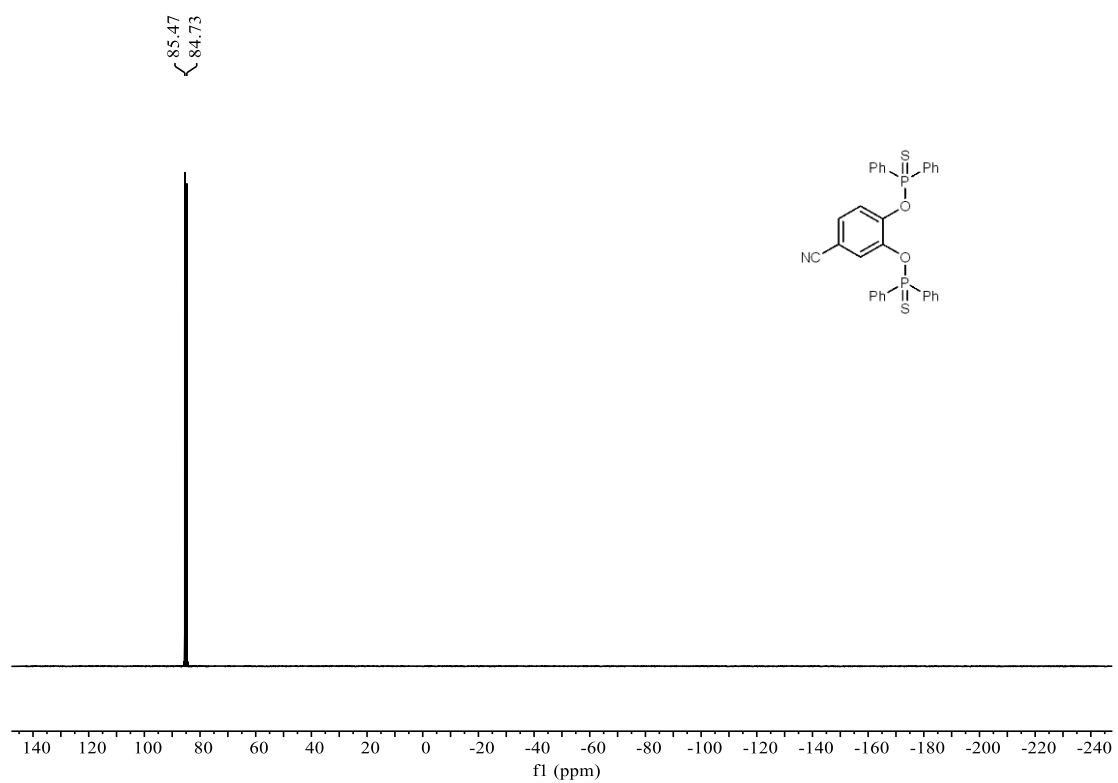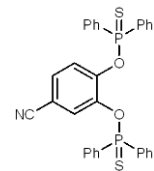

O,O'-(1,4-phenylene) bis(diphenylphosphinothioate) (**3i'**)

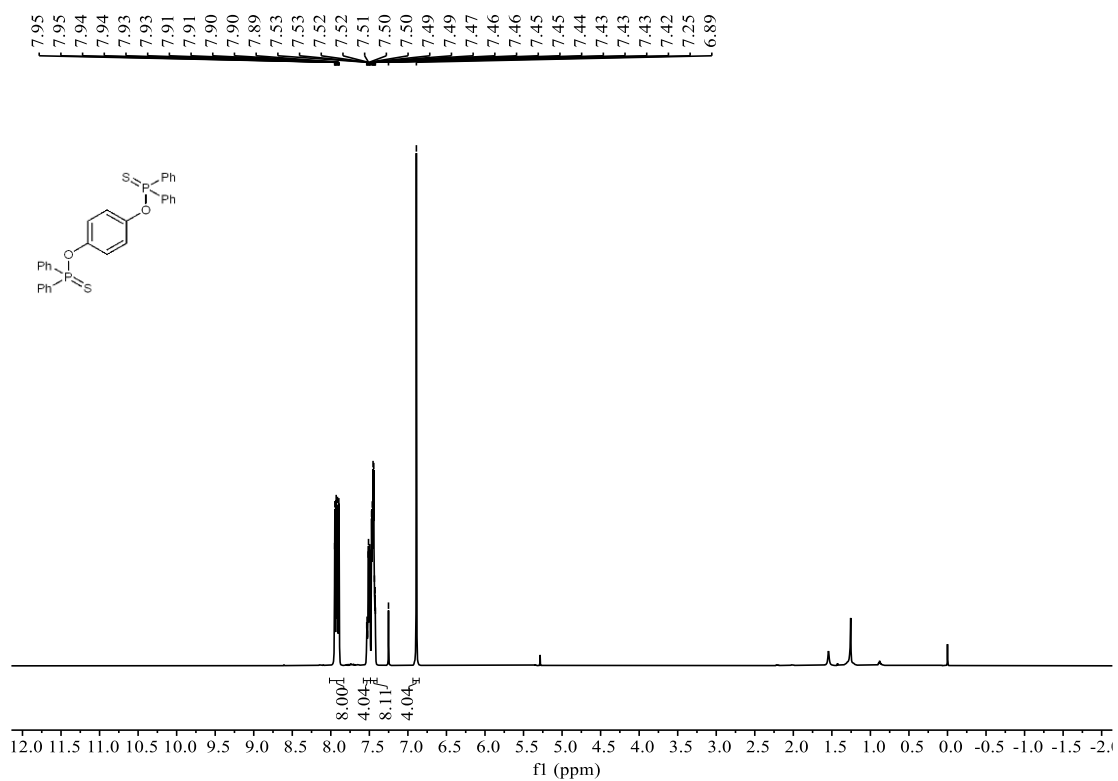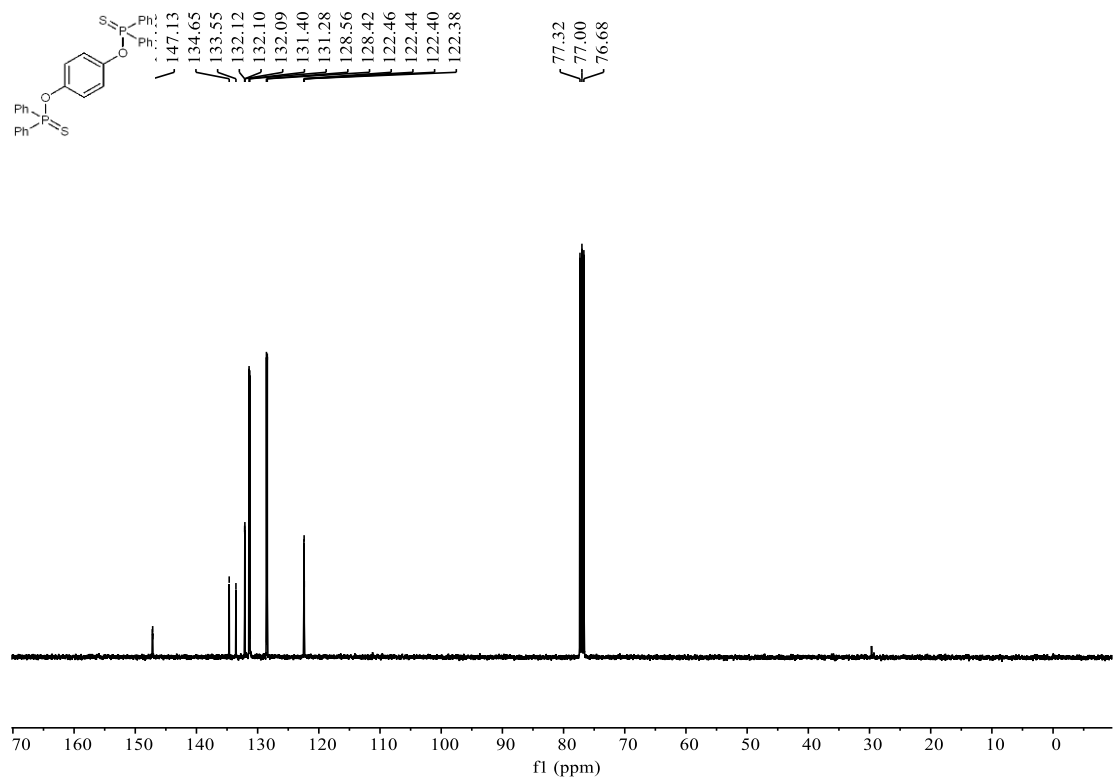

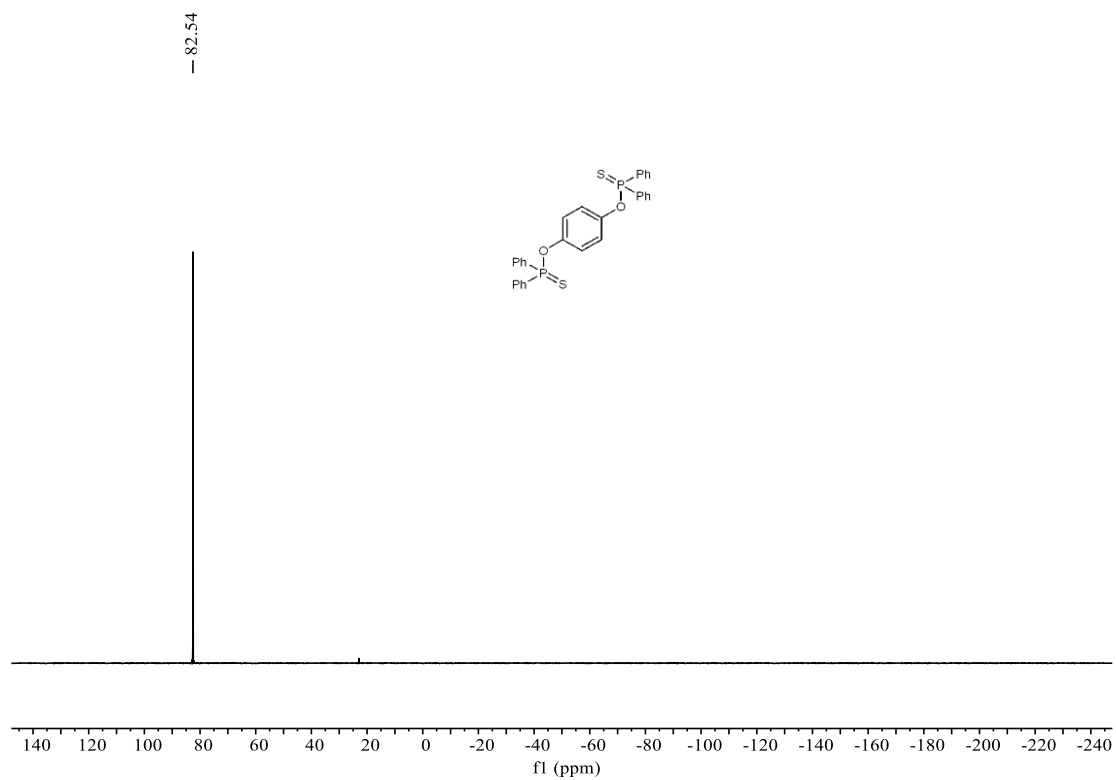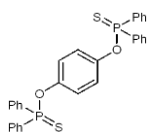

O,O'-(2-methyl-1,4-phenylene) bis(diphenylphosphinothioate) (**3j'**)

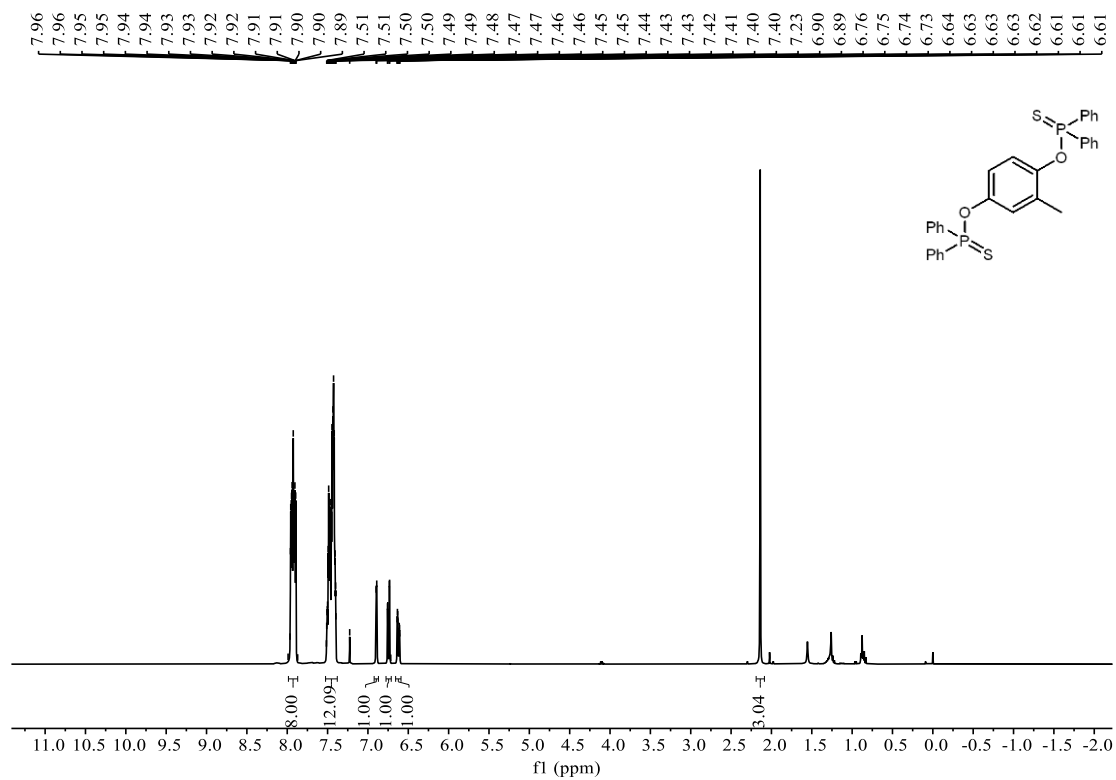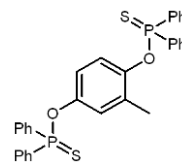

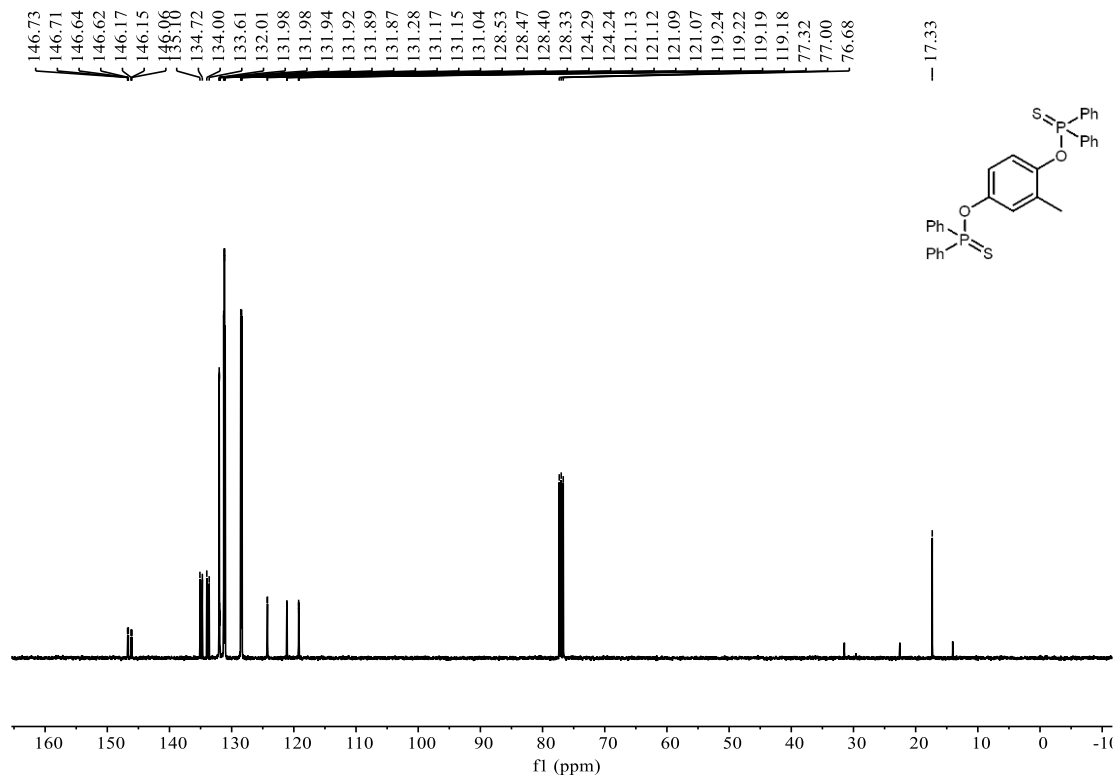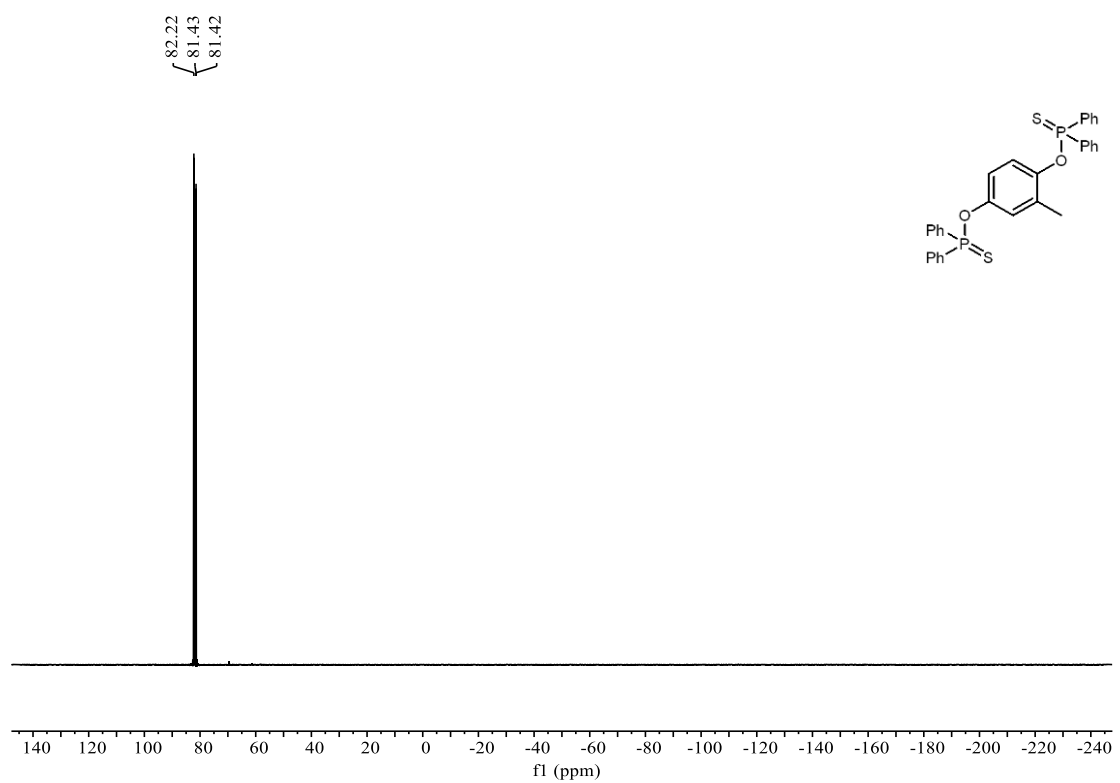



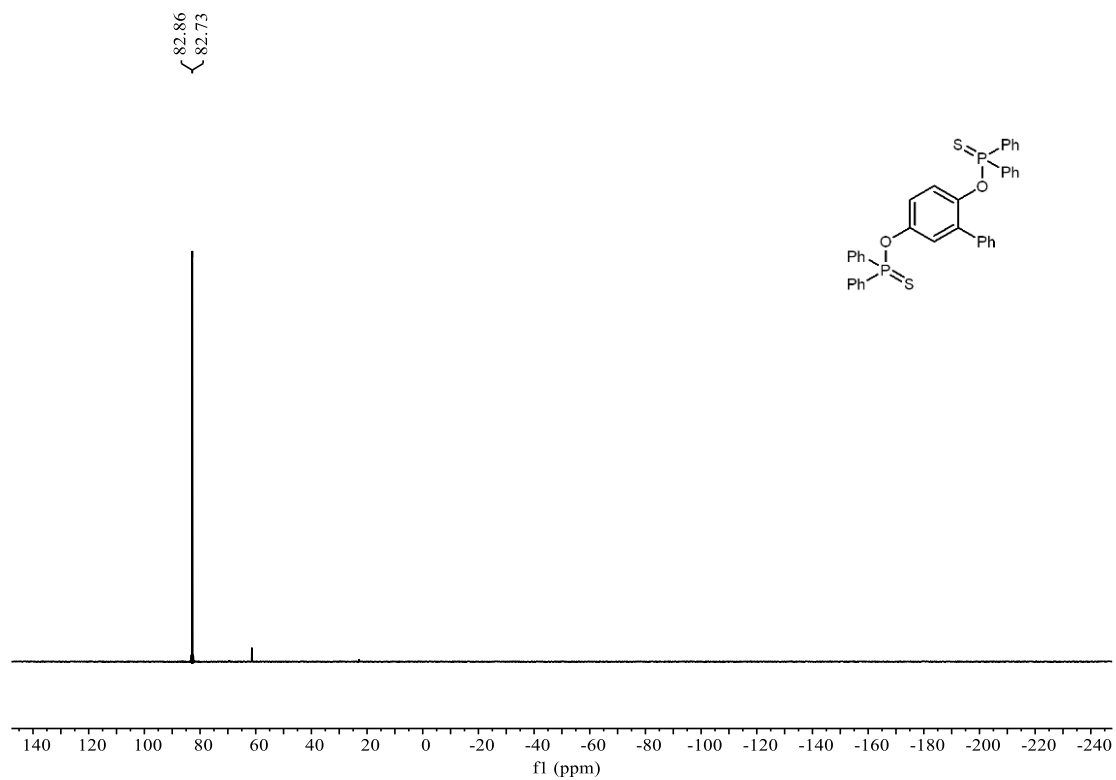

O,O'-(naphthalene-1,3-diyl) bis(diphenylphosphinothioate) (**31'**)

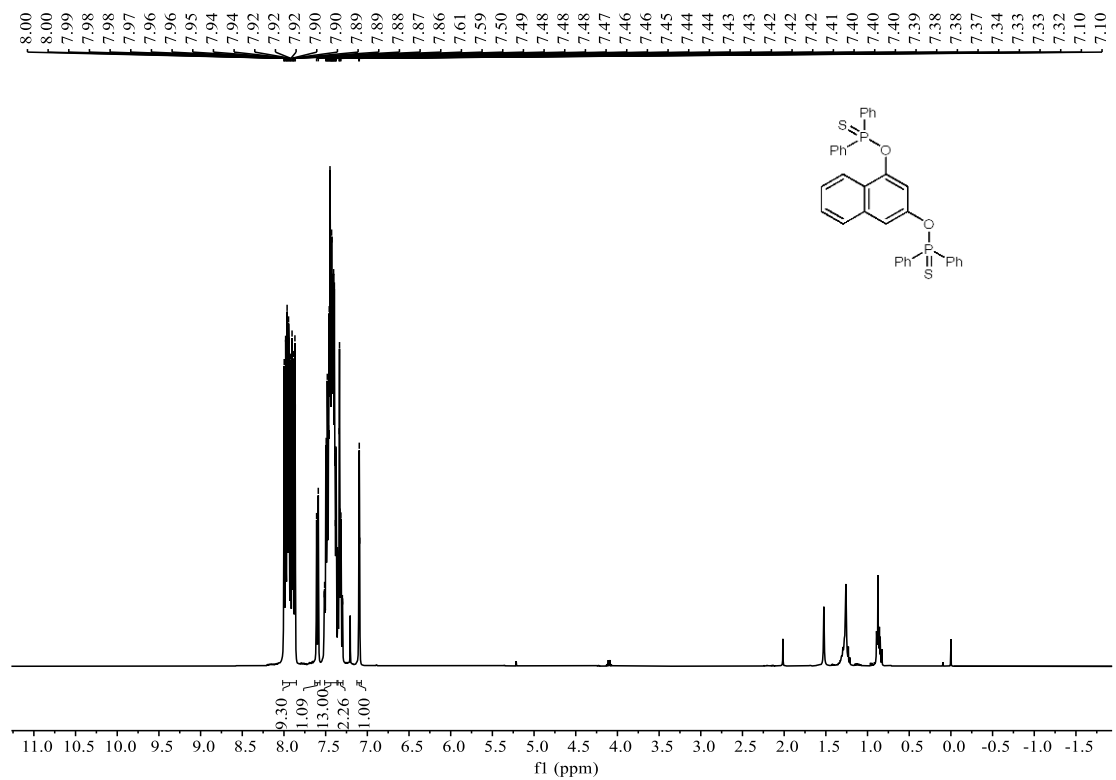

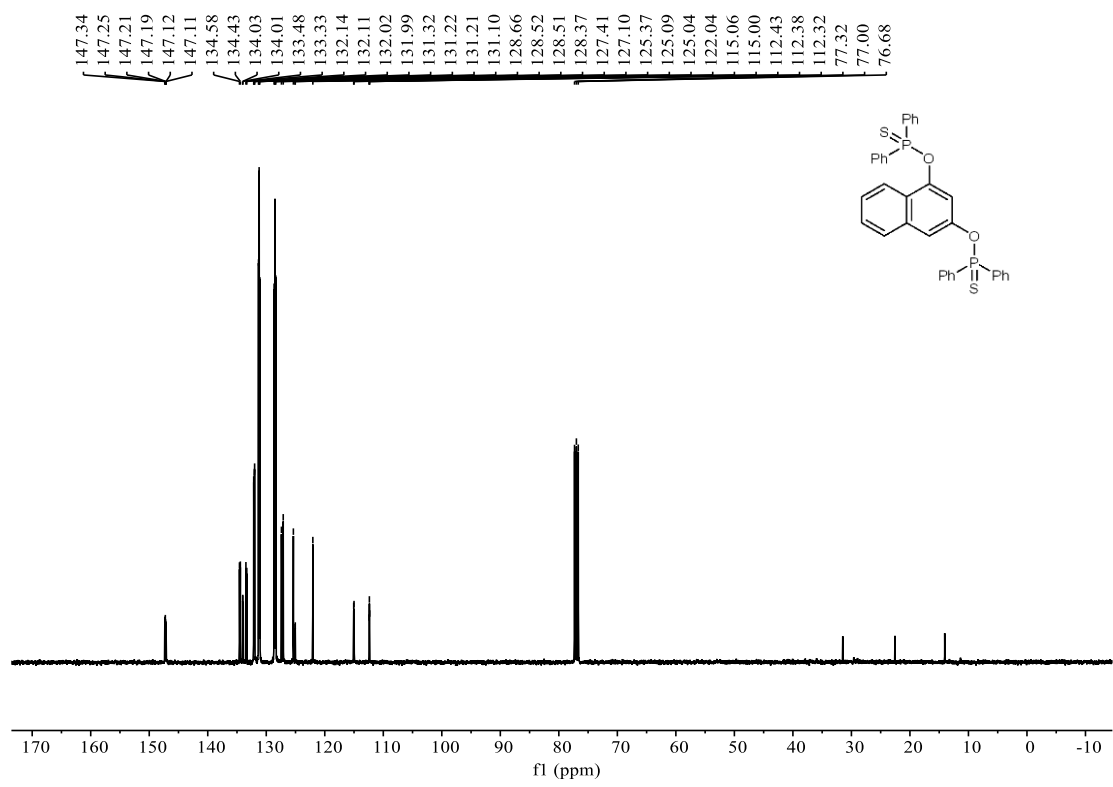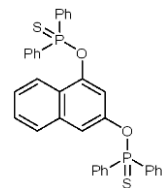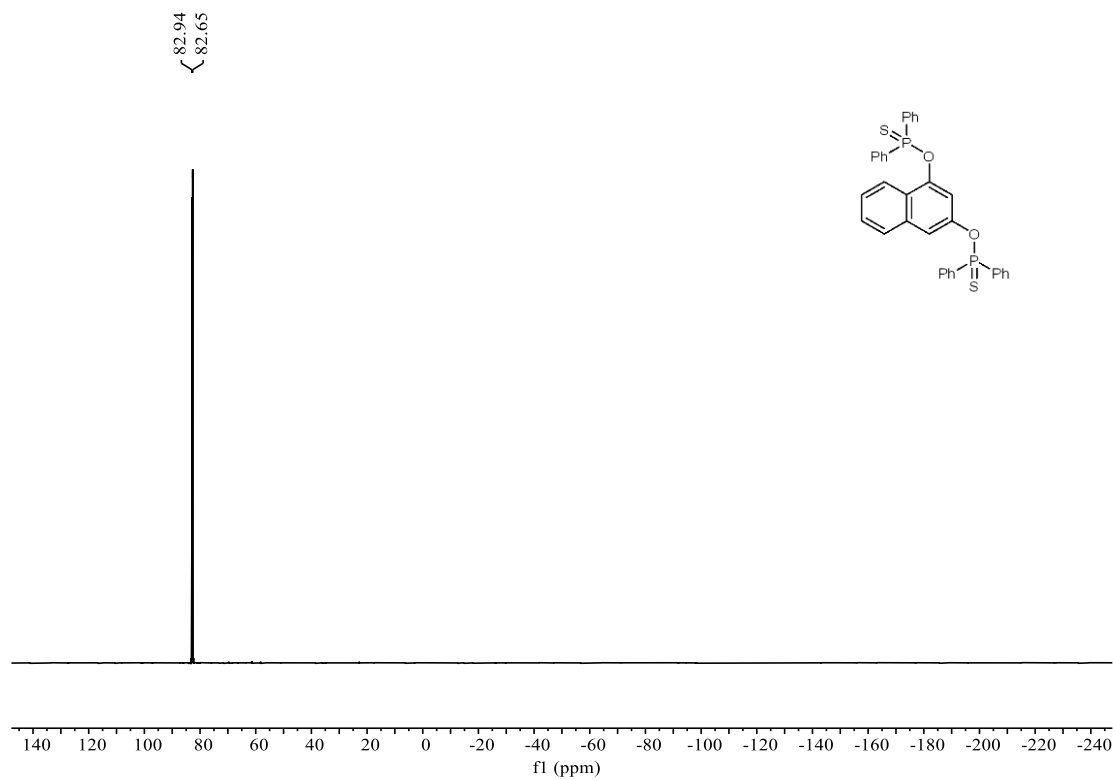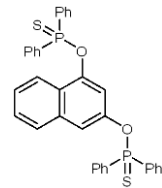

O,O'-(naphthalene-2,3-diyl) bis(diphenylphosphinothioate) (**3m'**)

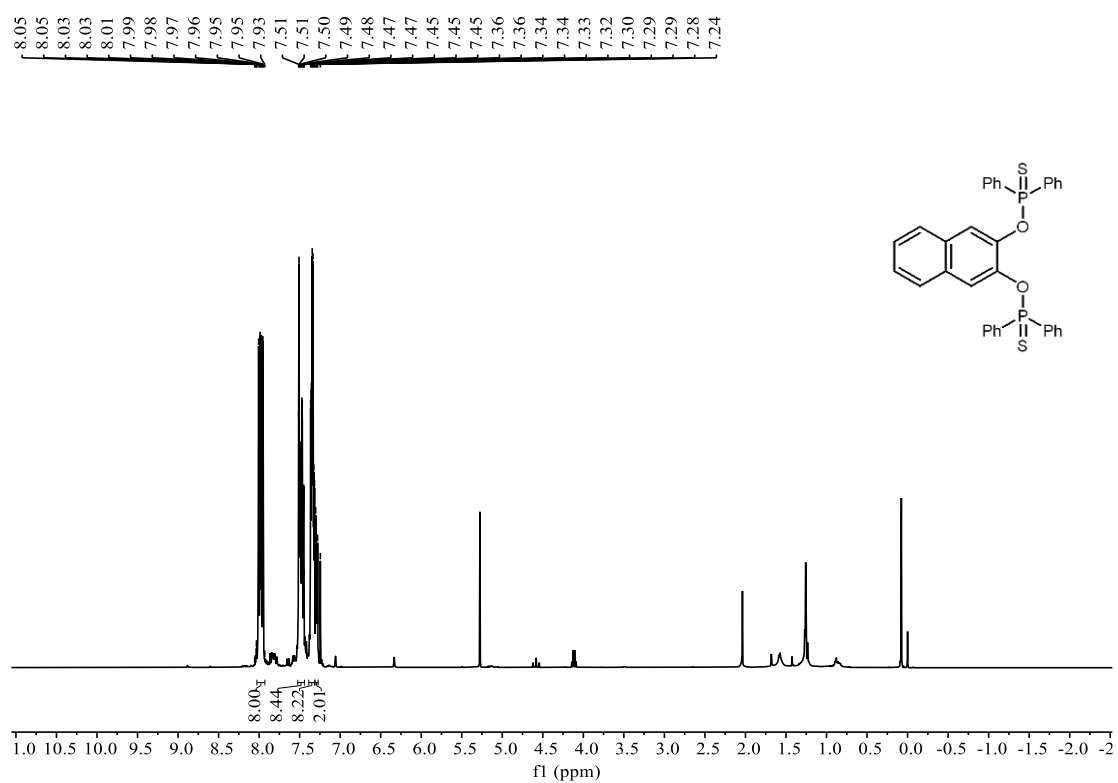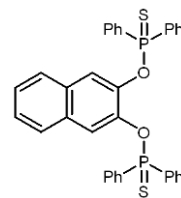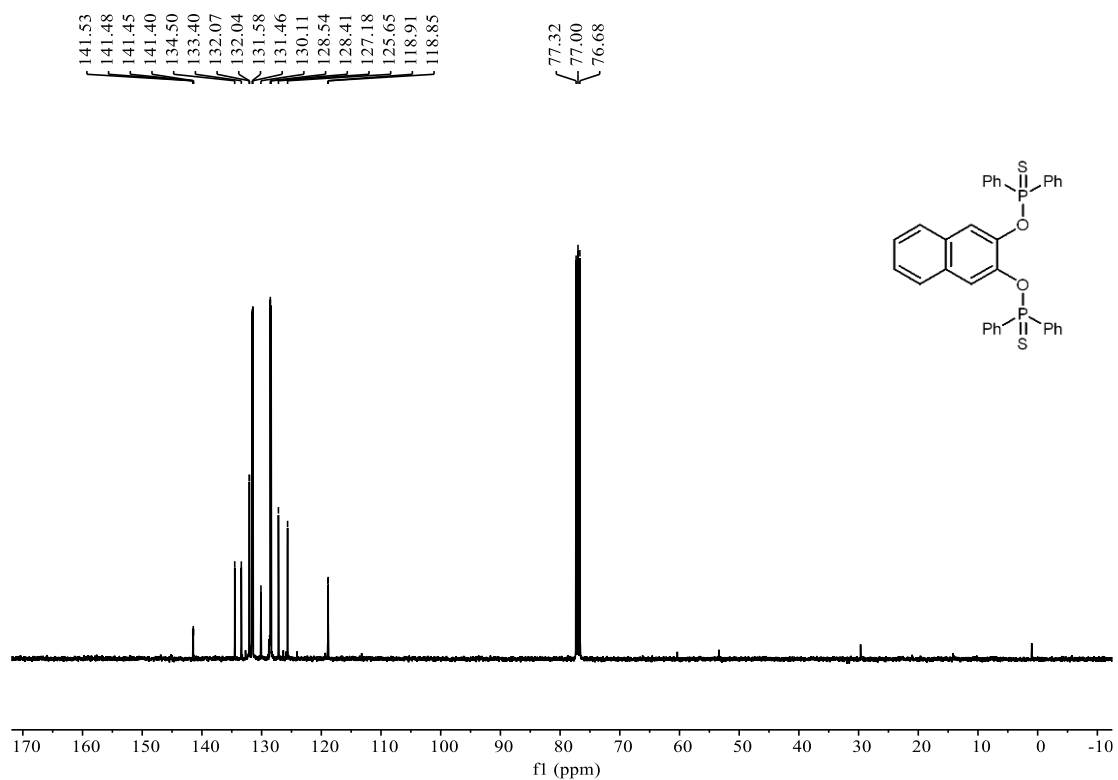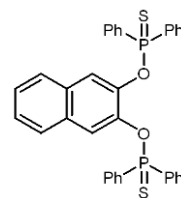

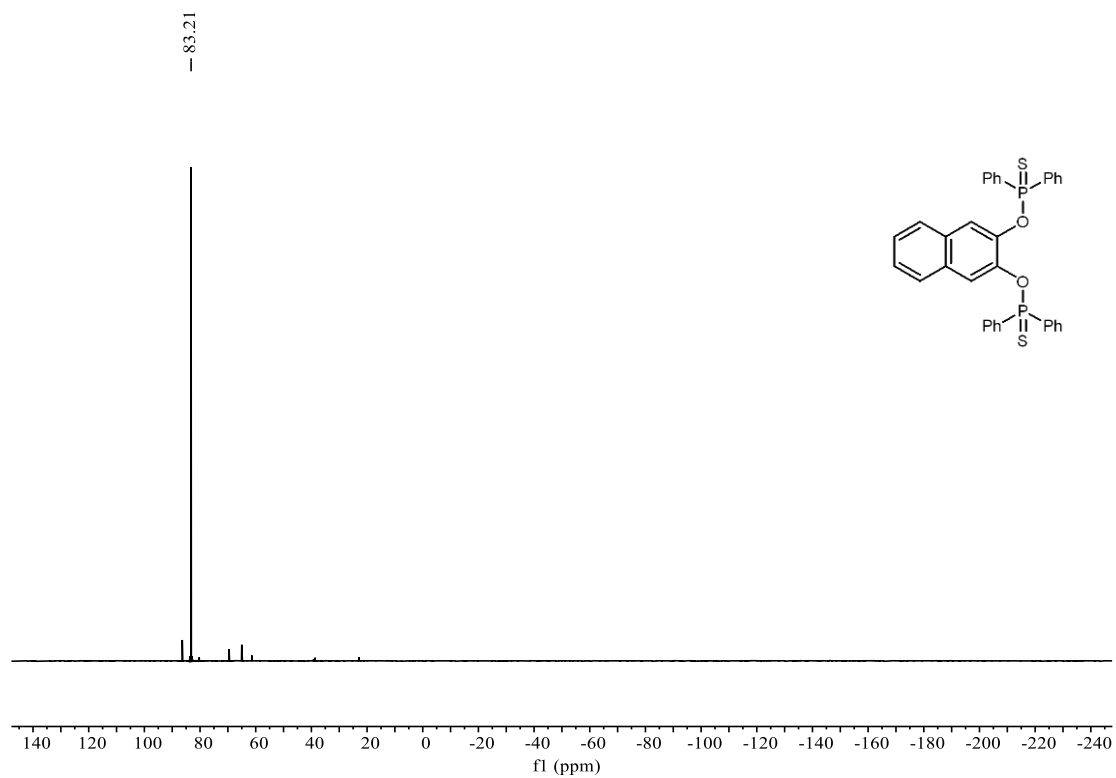

**O,O'-(naphthalene-1,4-diyl) bis(diphenylphosphinothioate) (**3n'**)**

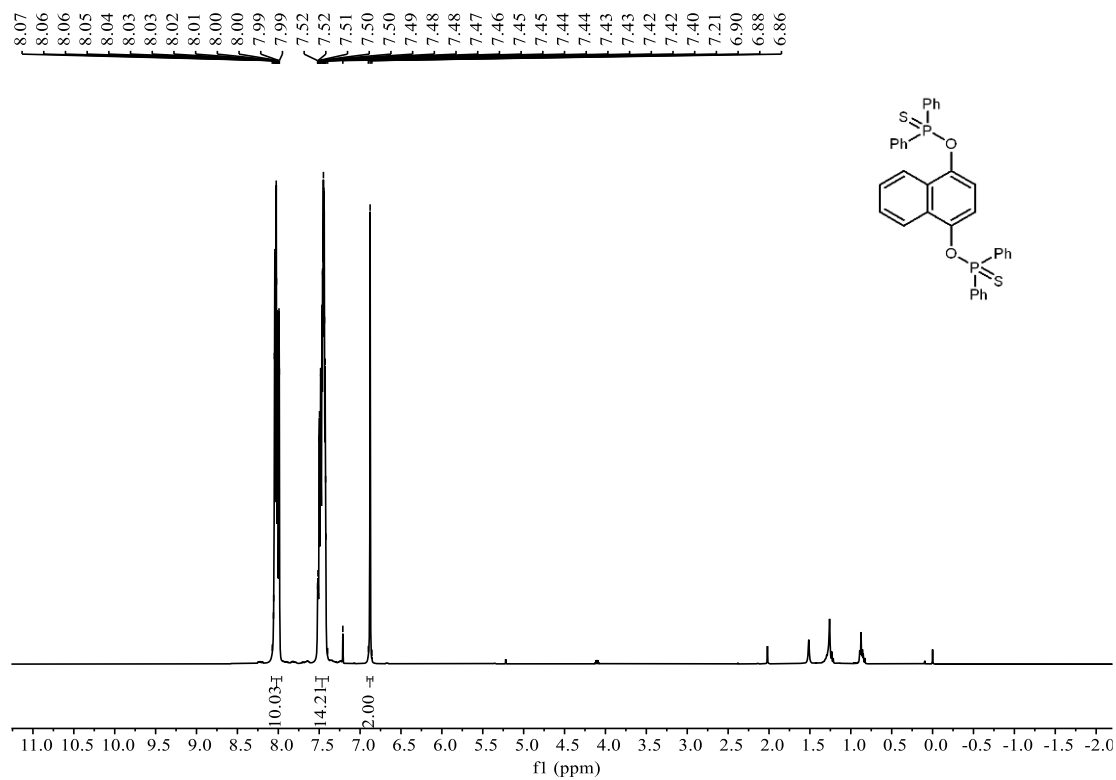

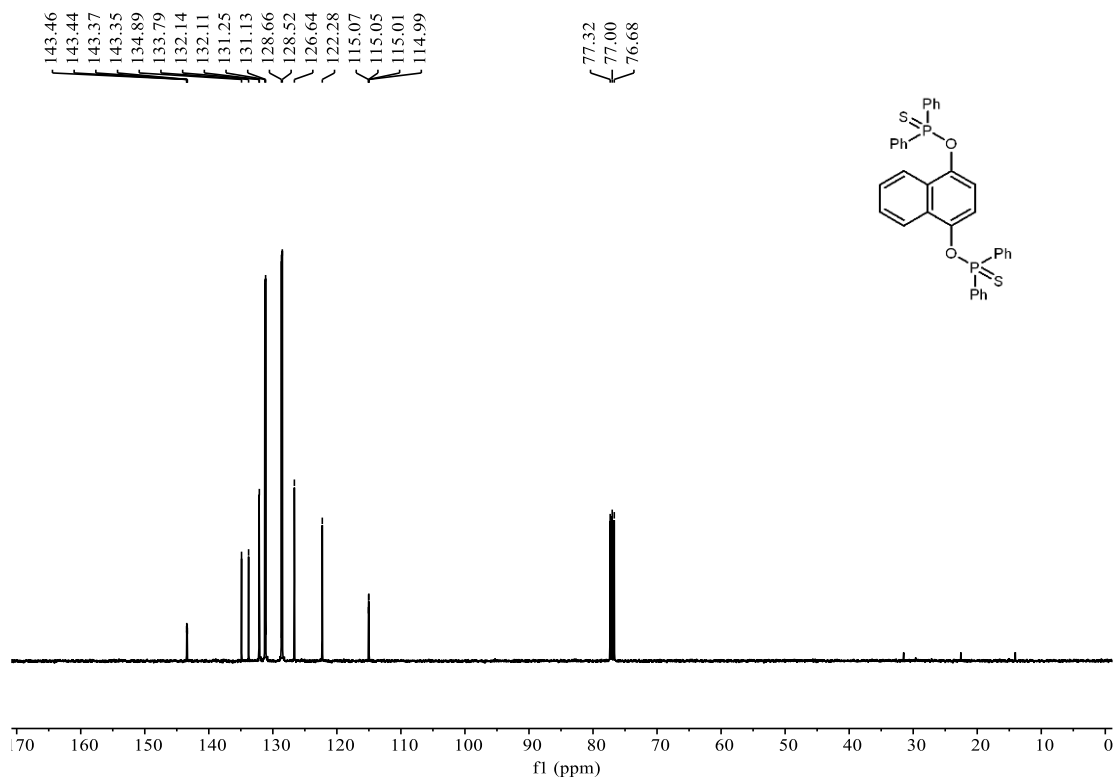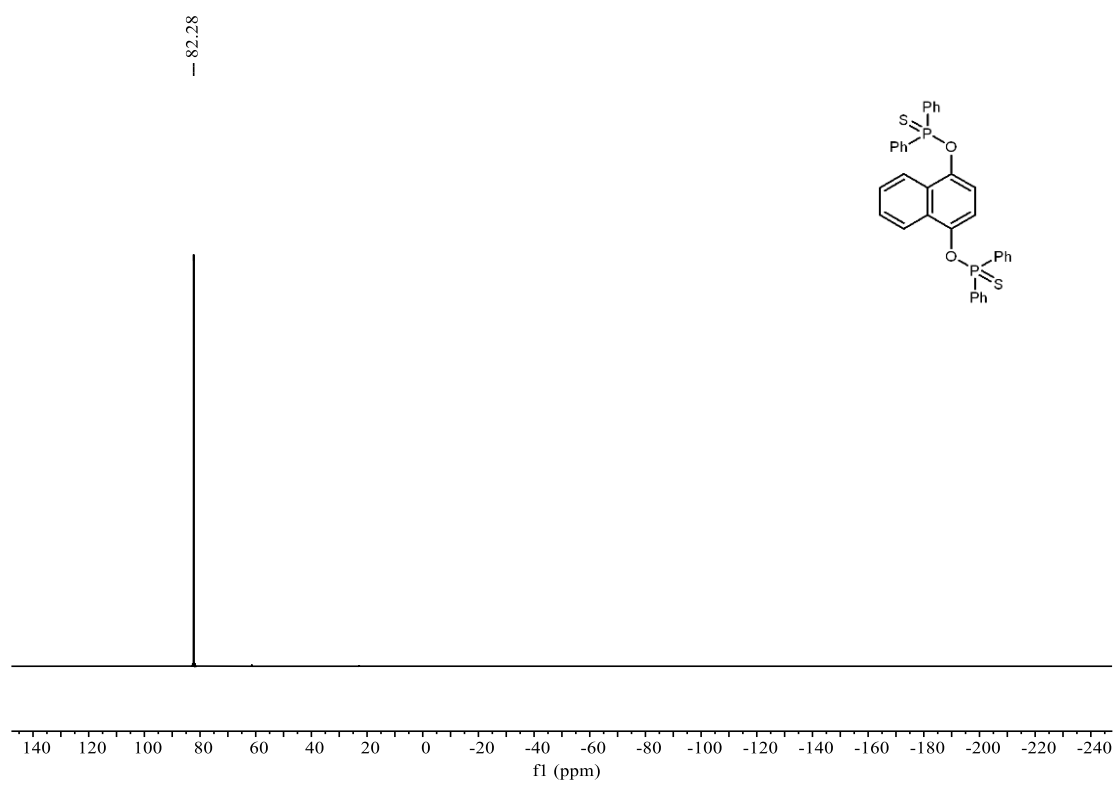

O,O'-([1,1'-biphenyl]-2,2'-diyl) bis(diphenylphosphinothioate) (**3o'**)

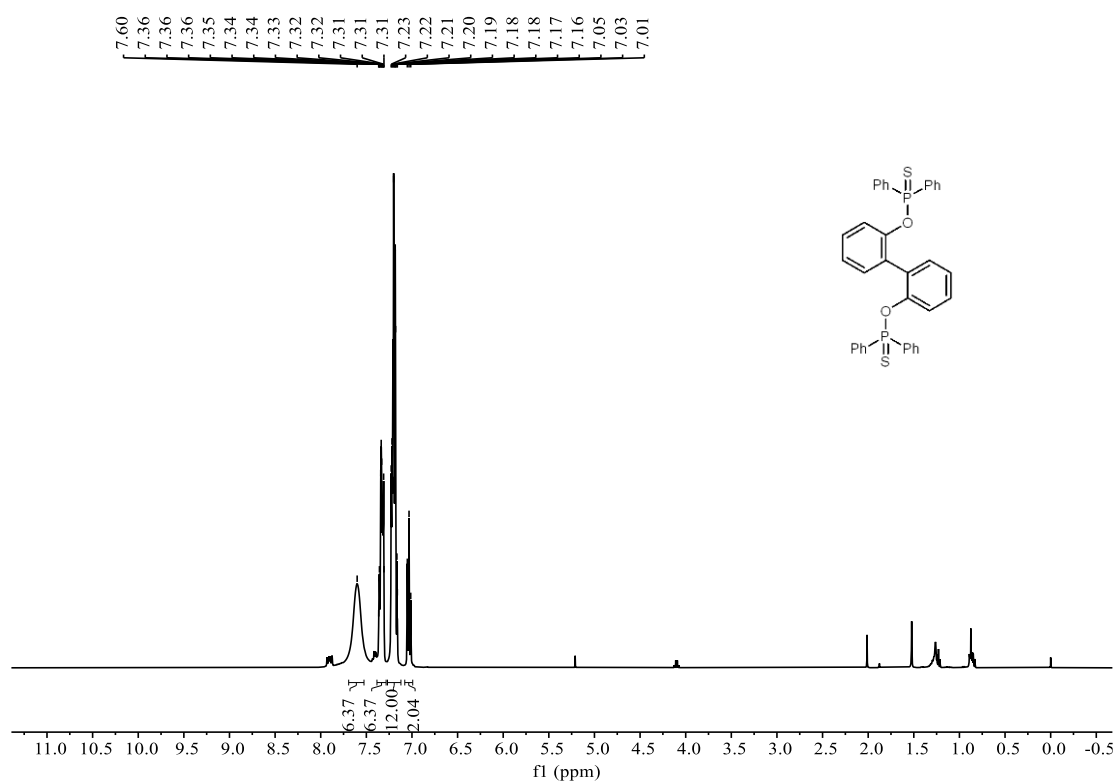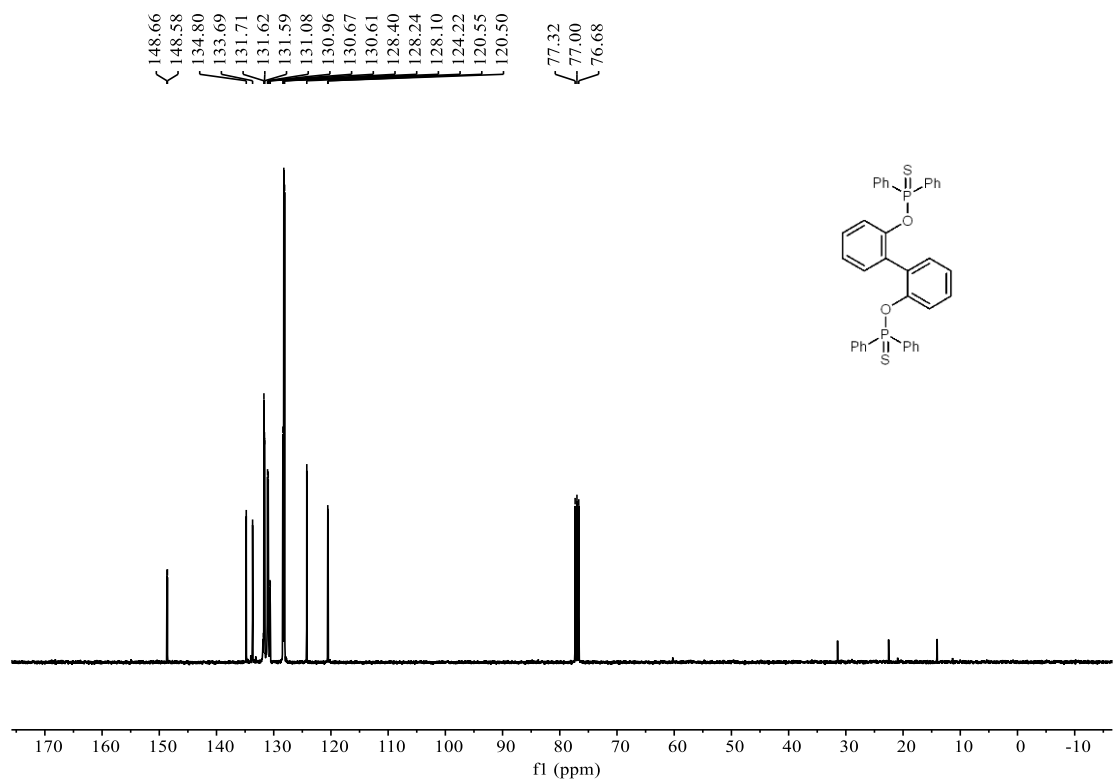

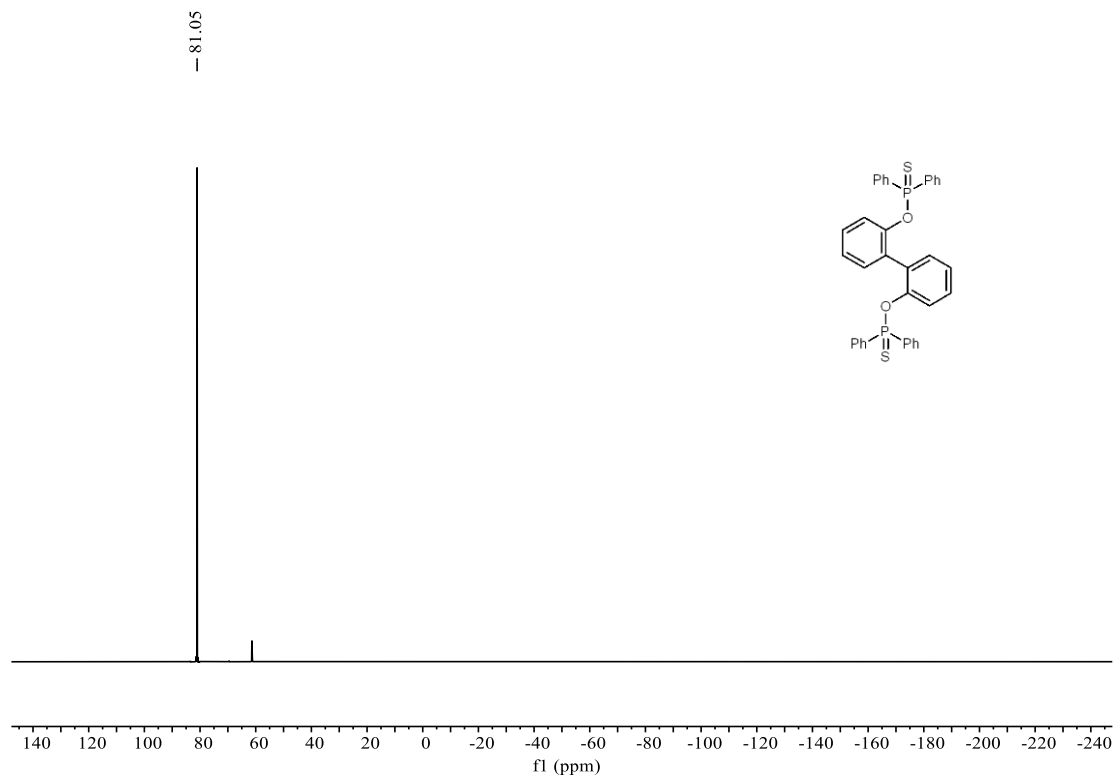

O,O'-([1,1'-binaphthalene]-2,2'-diyl) bis(diphenylphosphinothioate) (**3p'**)

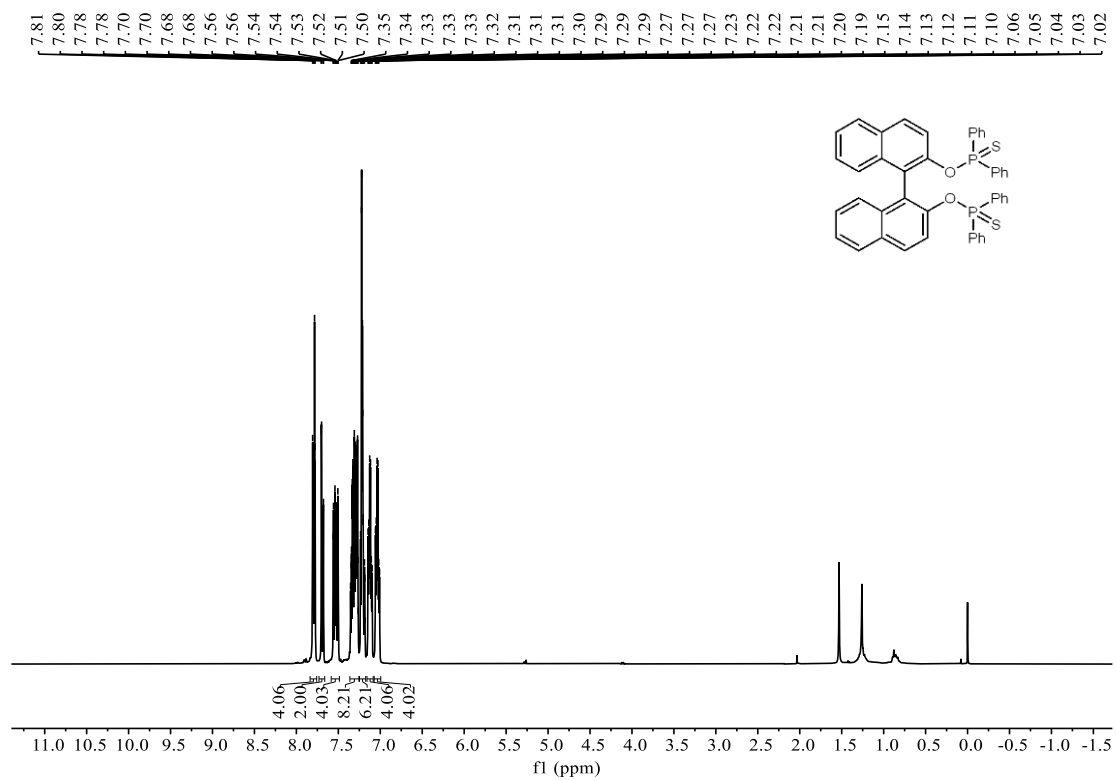

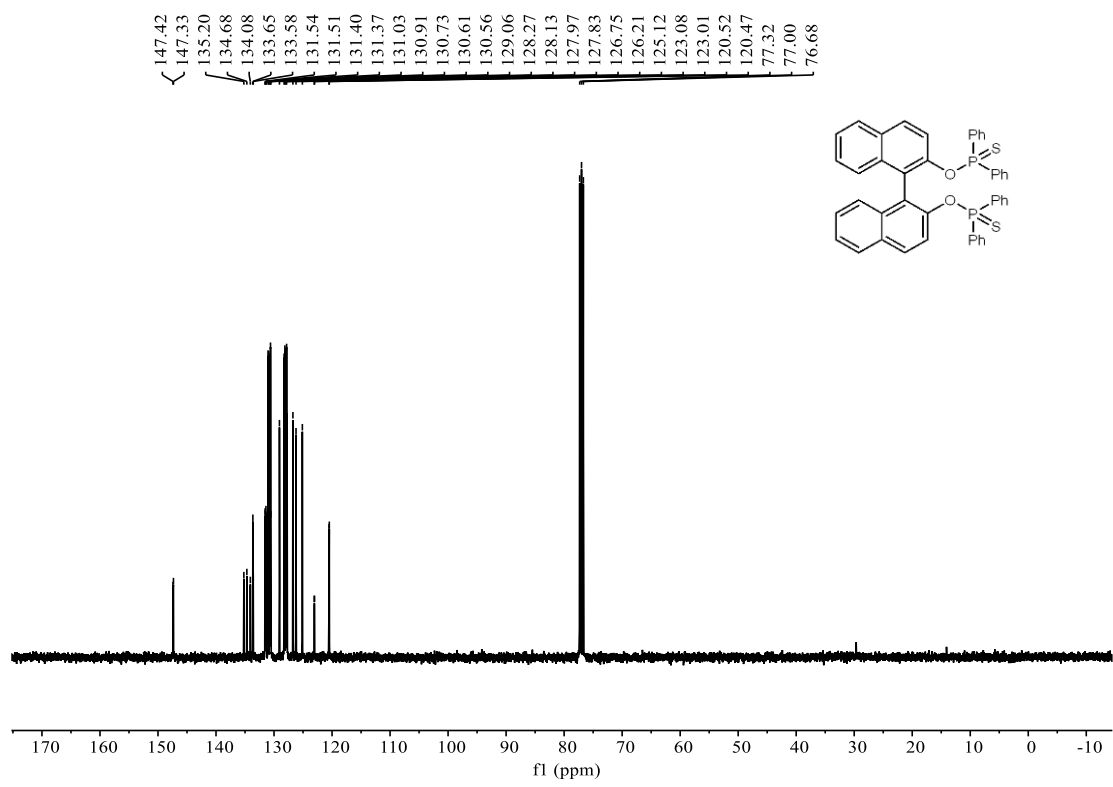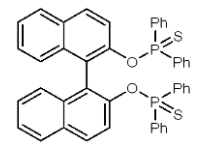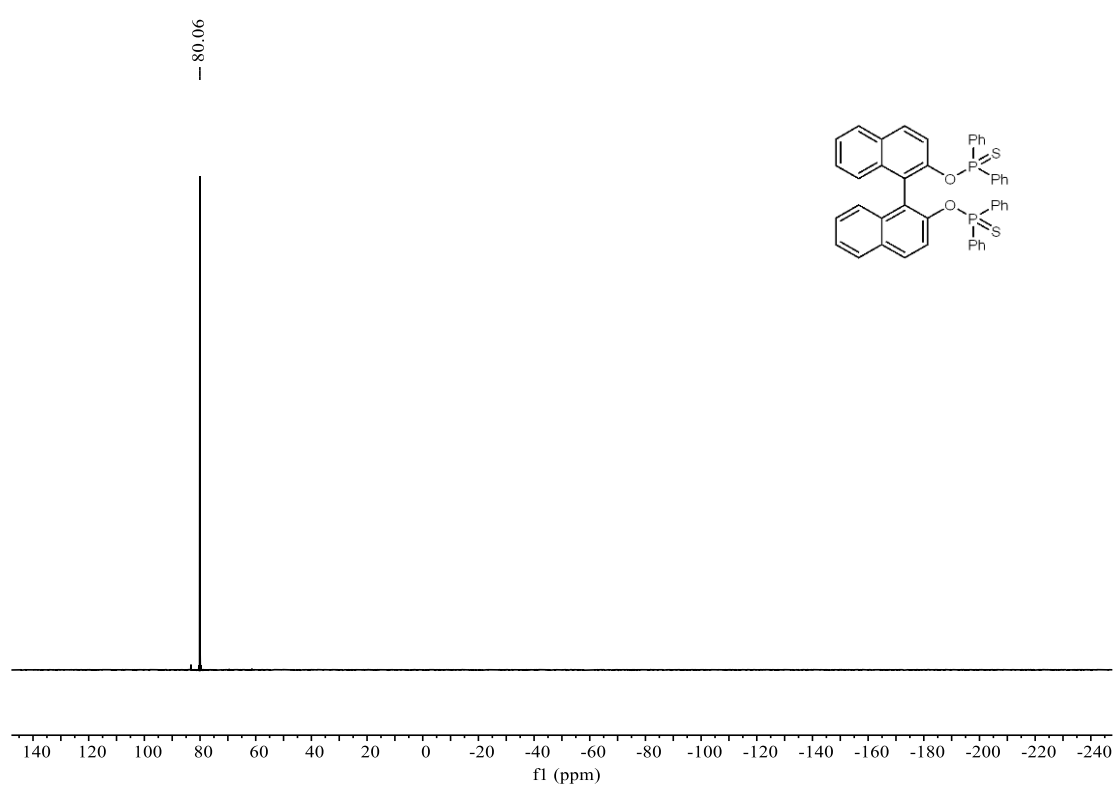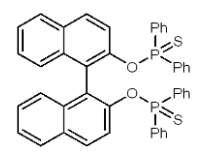



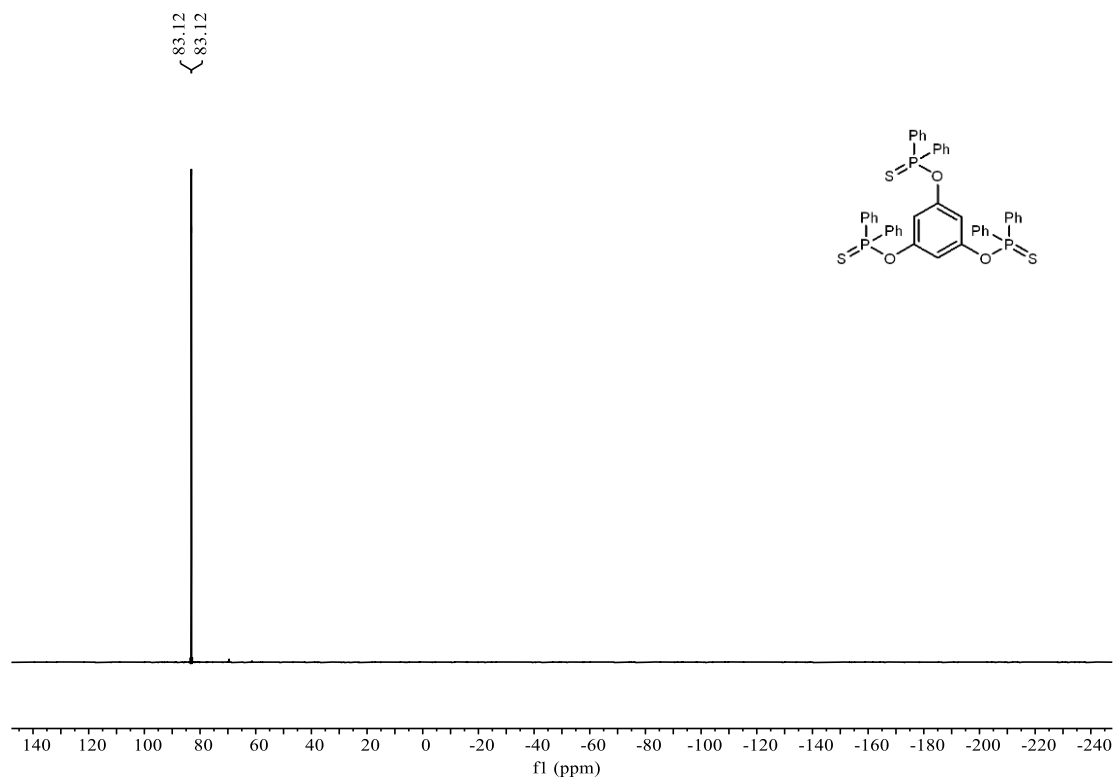

O,O',O''-(benzene-1,2,4-triyl) tris(diphenylphosphinothioate) (**3r'**)

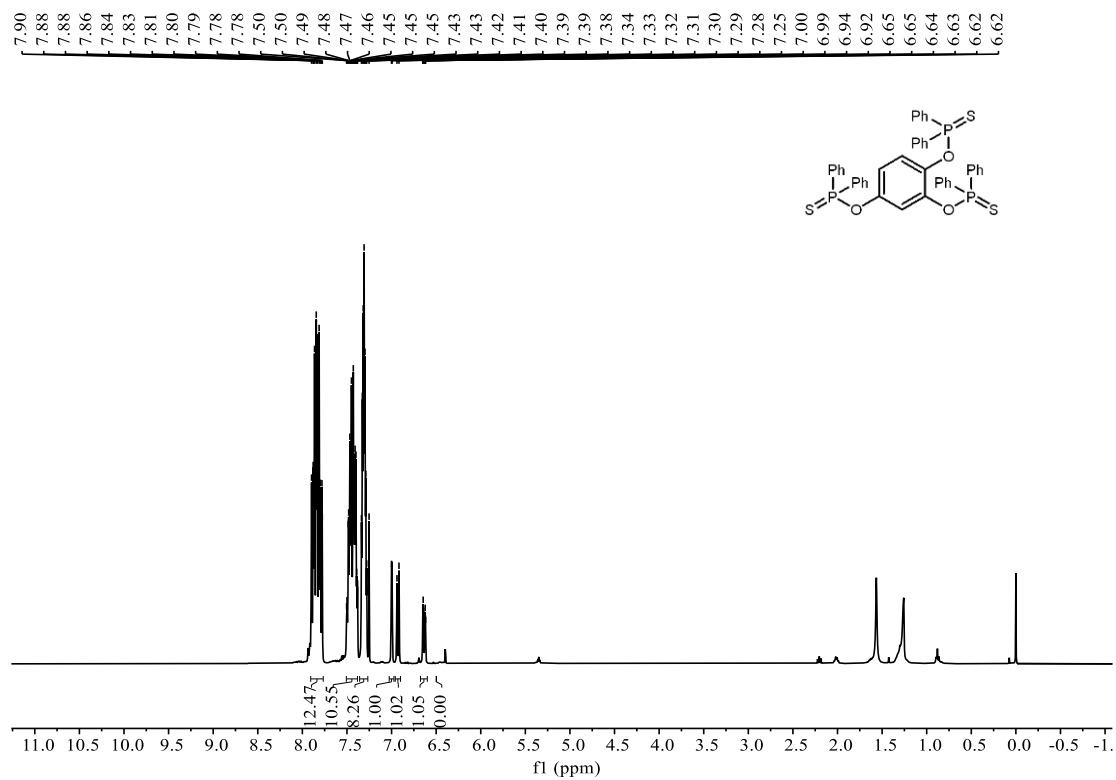

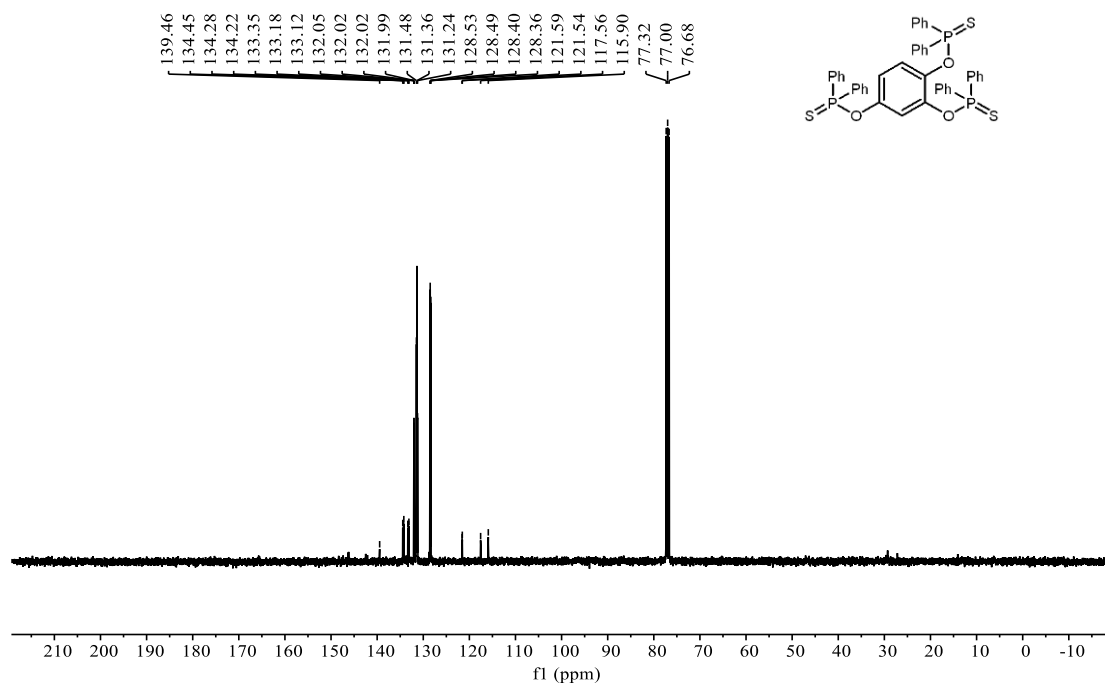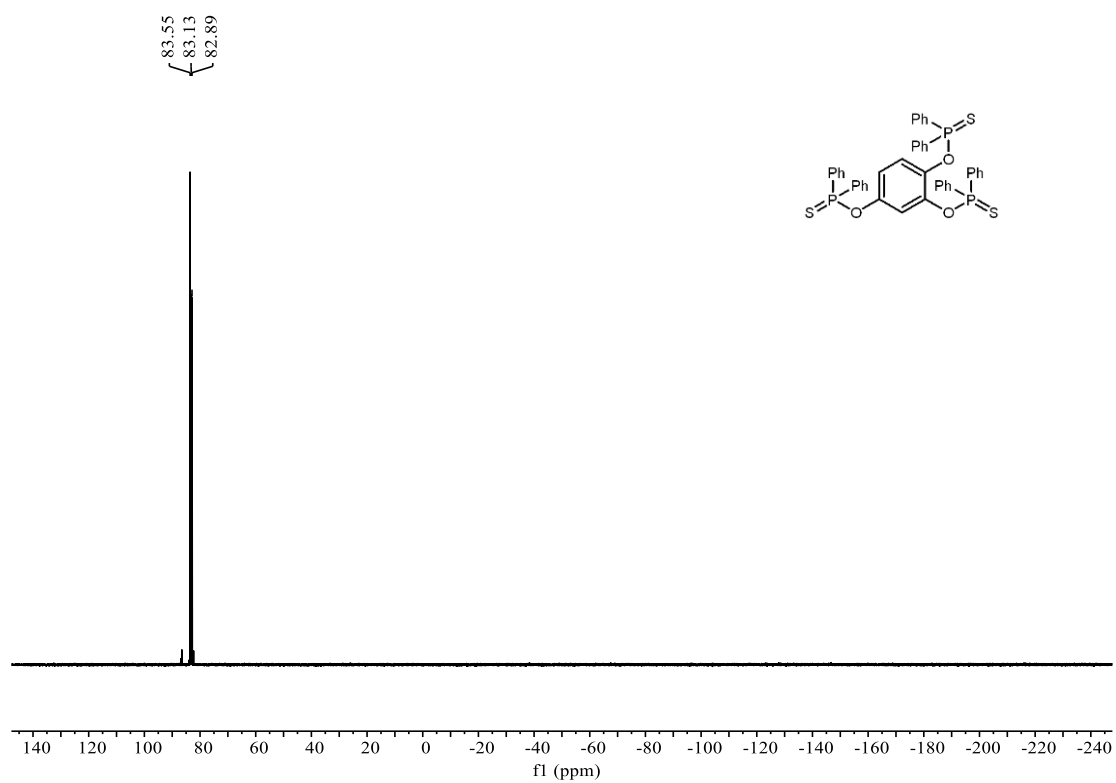

O,O'-(1,3-phenylene) bis(di-tert-butylphosphinothioate) (**3s'**)

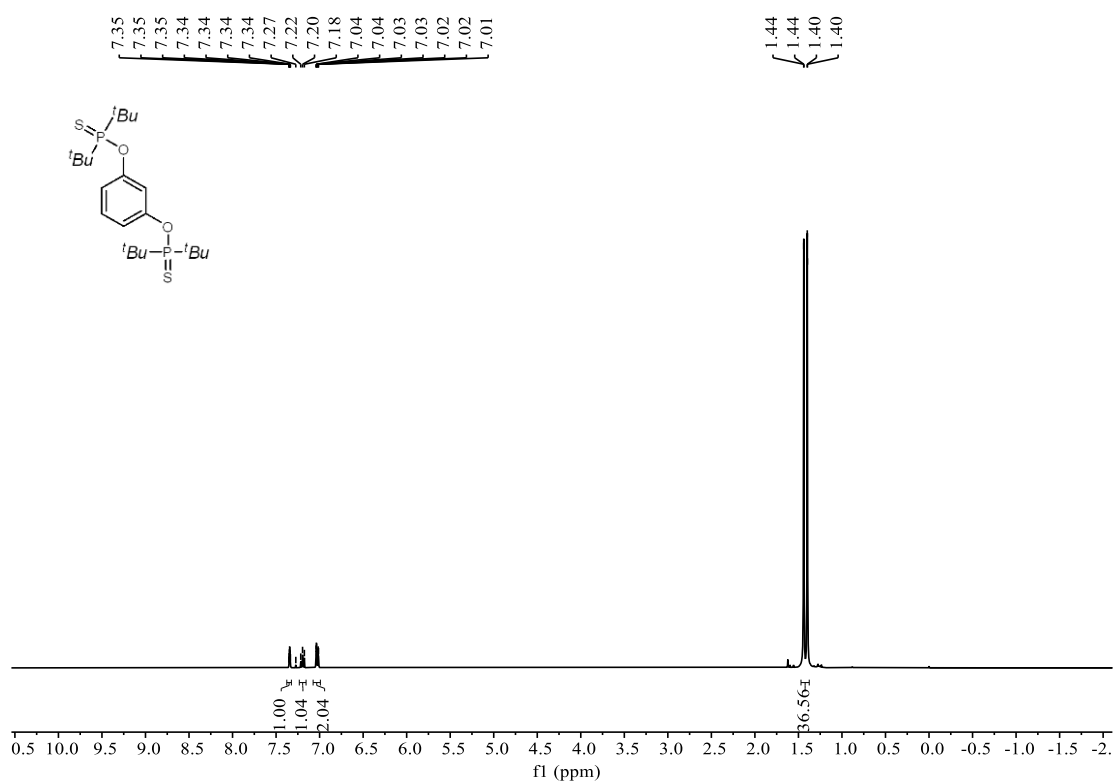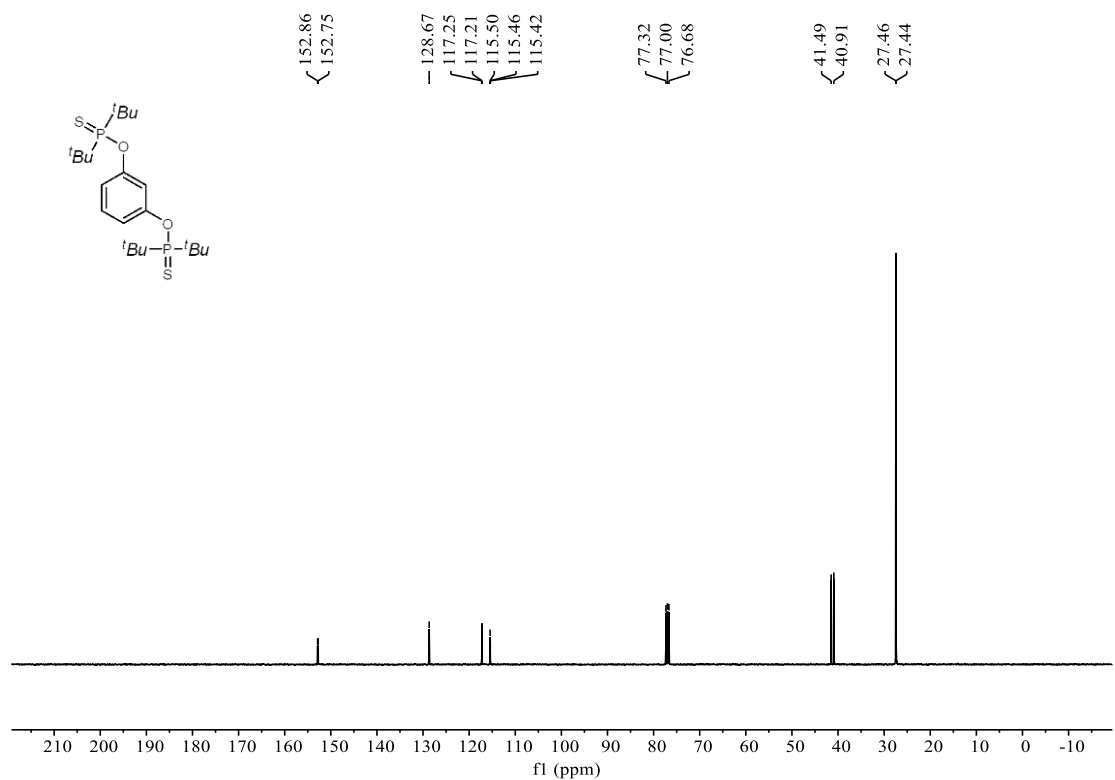

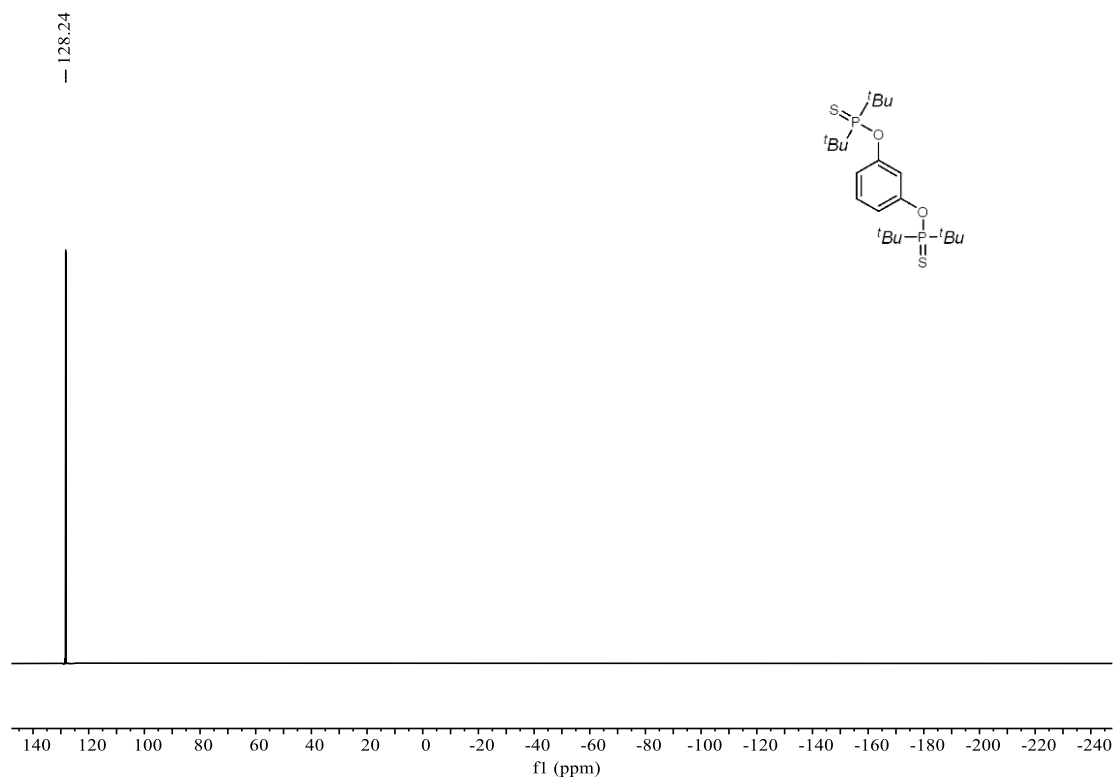

O,O'-(1,4-phenylene) bis(di-tert-butylphosphinothioate) (**3t'**)

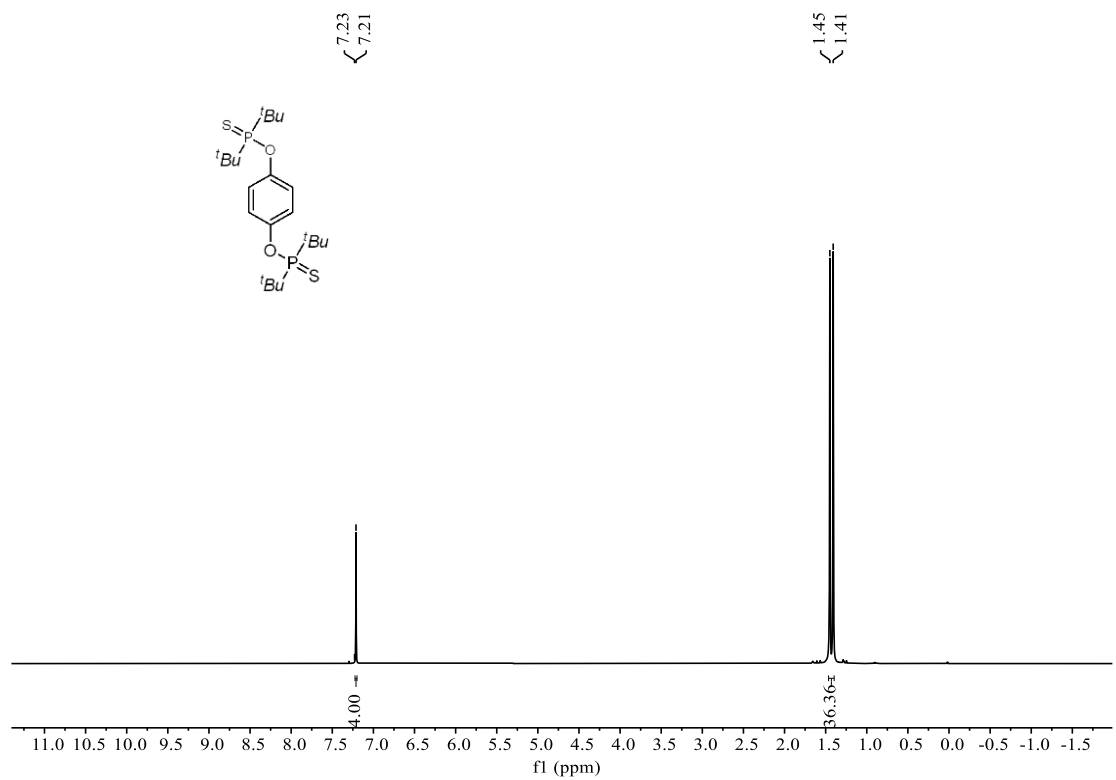

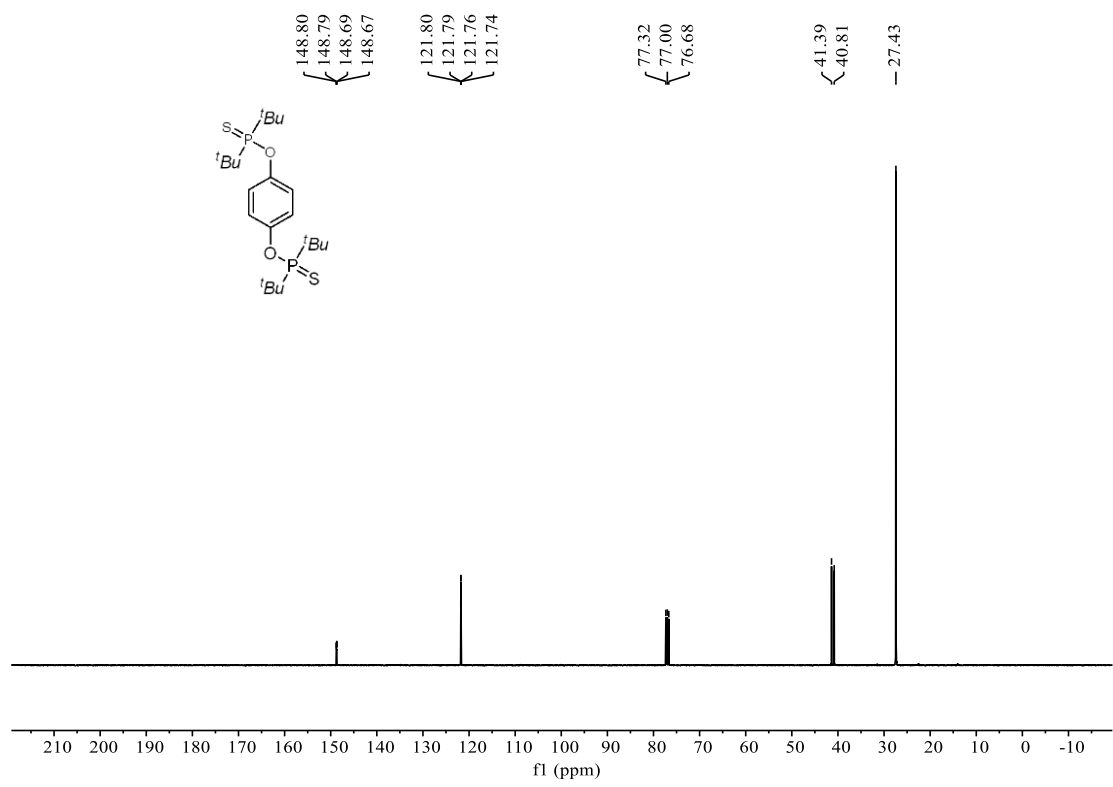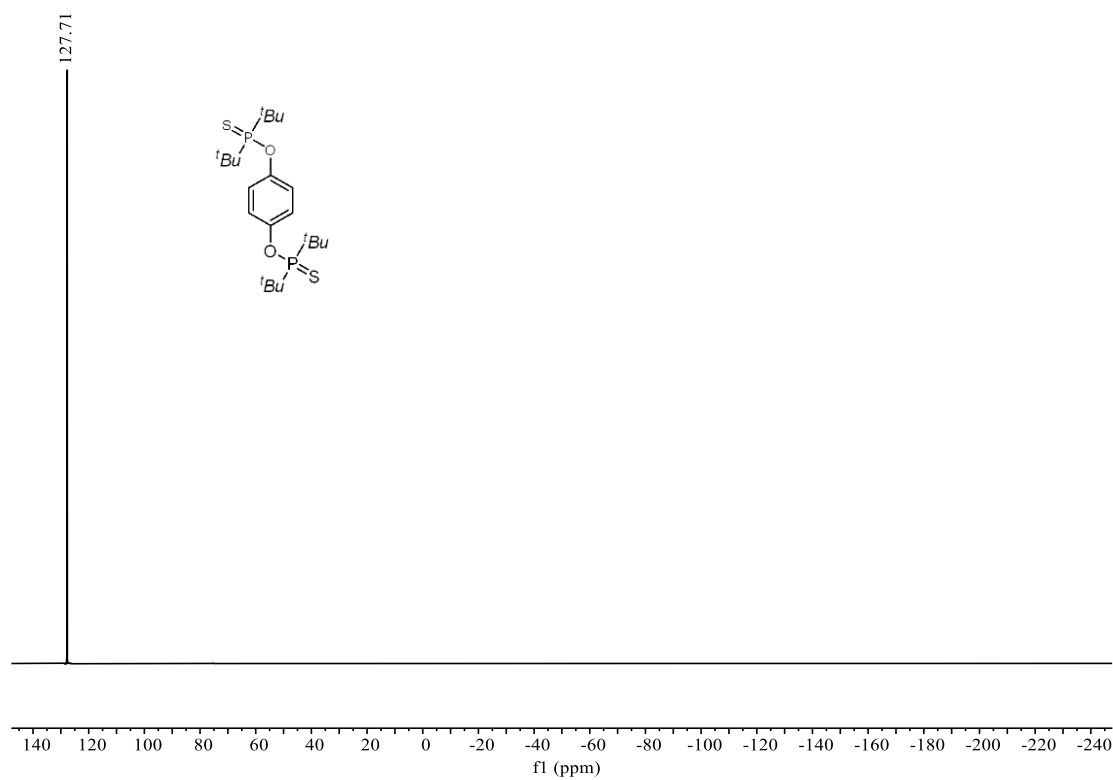

O,O'-(1,2-phenylene) bis(di-tert-butylphosphinothioate) (**3u'**)

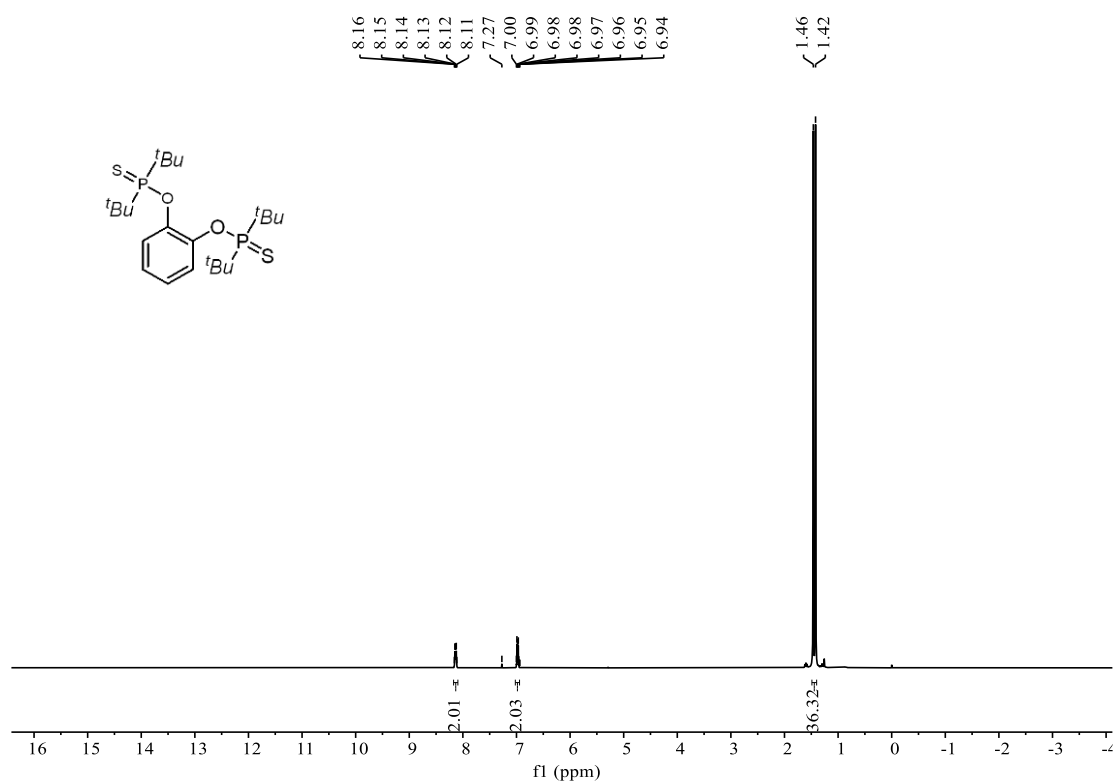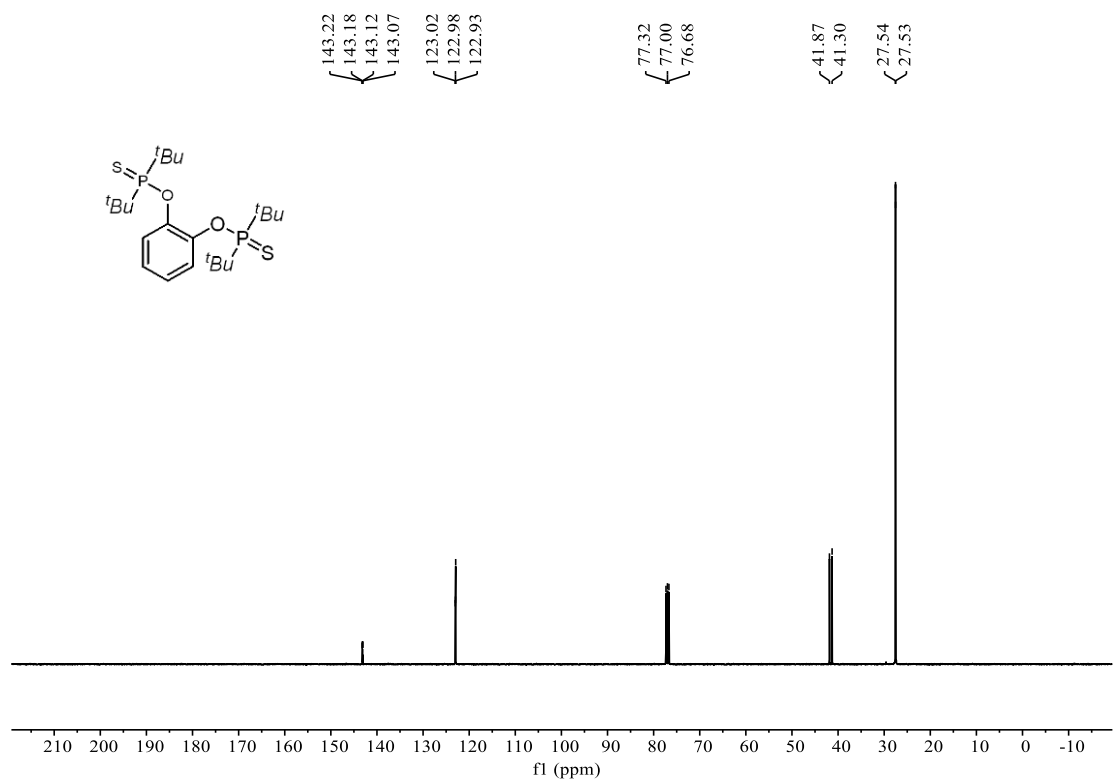

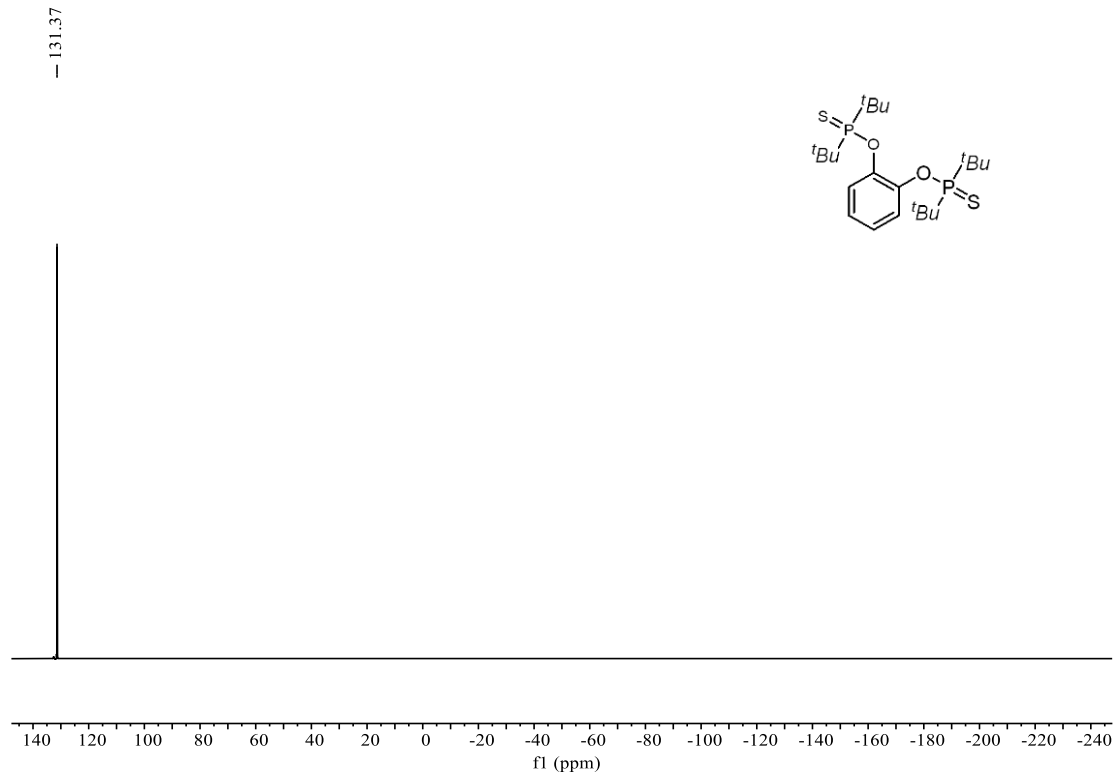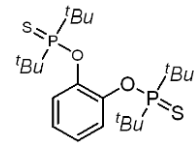

O-phenyl diphenylphosphinothioate (**3v'**)

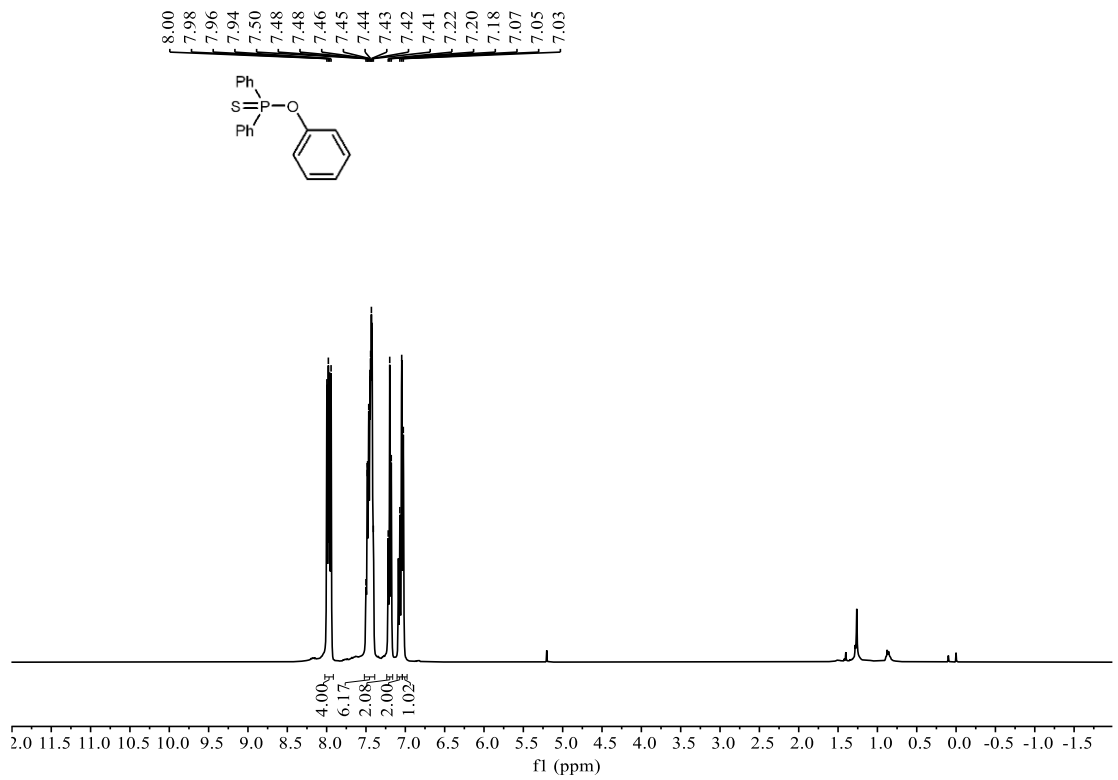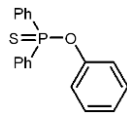

8.00  
7.98  
7.96  
7.94  
7.50  
7.48  
7.48  
7.46  
7.45  
7.44  
7.43  
7.42  
7.41  
7.22  
7.20  
7.18  
7.07  
7.05  
7.03

4.00  
6.17  
2.08  
2.00  
1.02

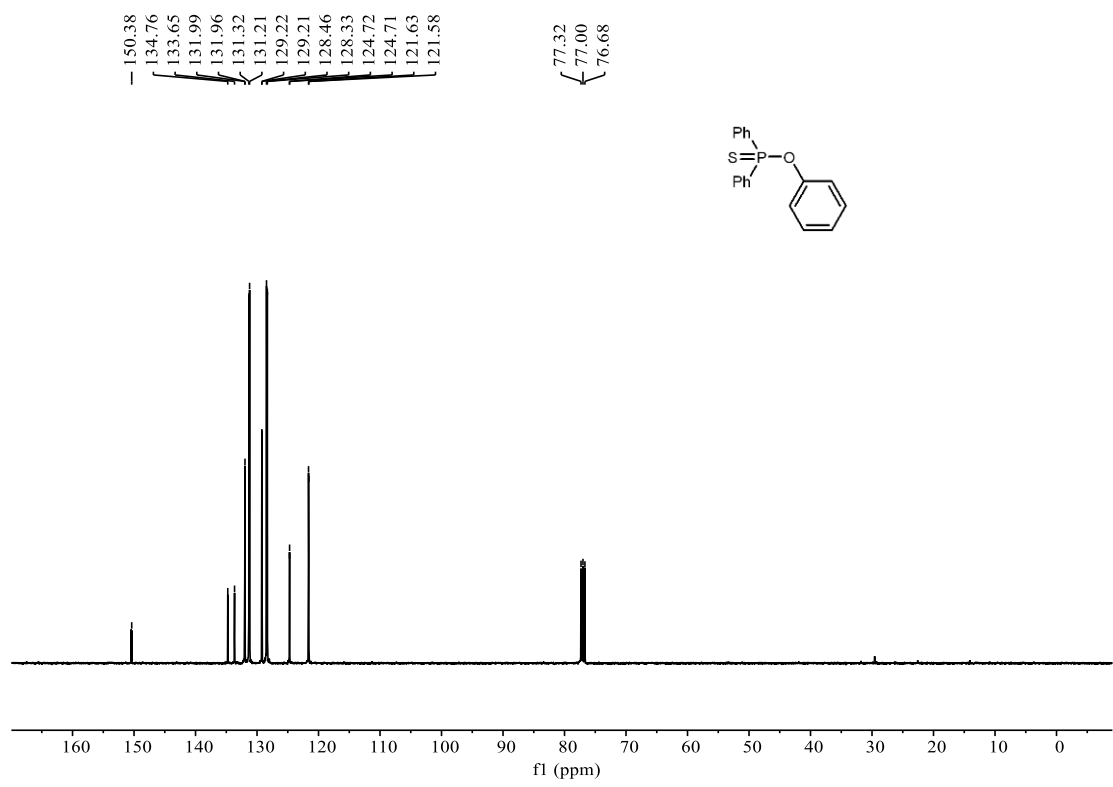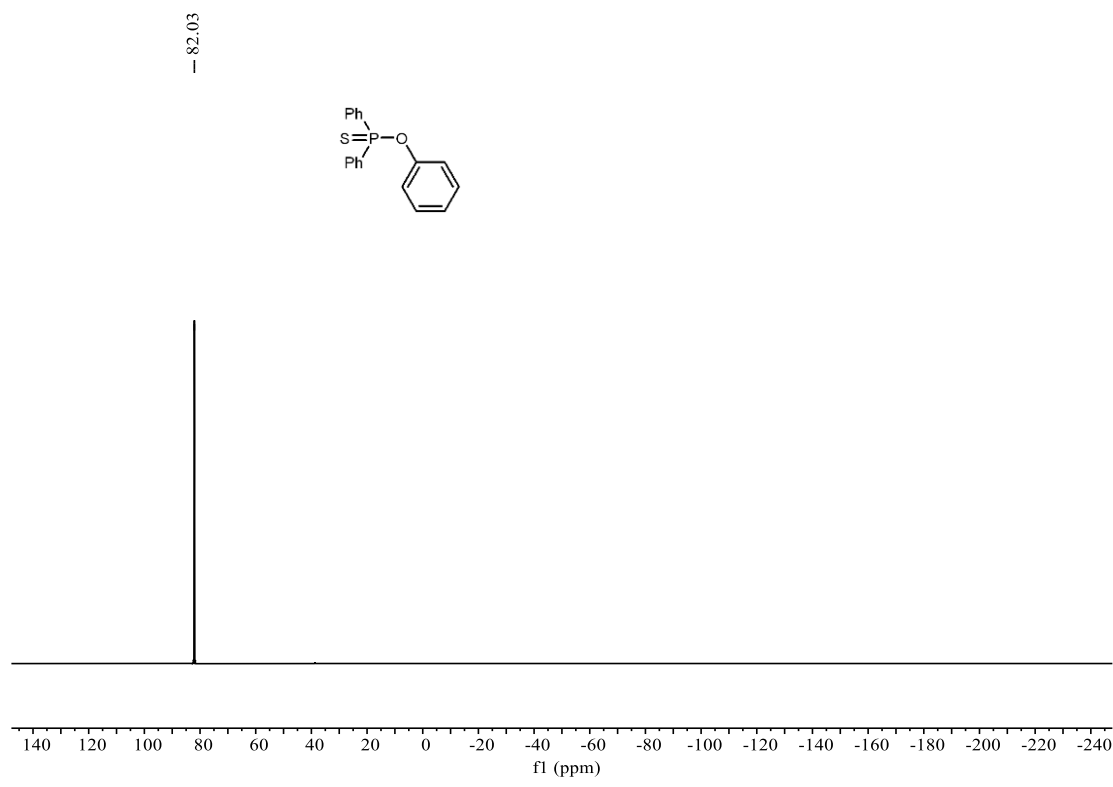

# O-(4-chlorophenyl) diphenylphosphinothioate (**3w'**)

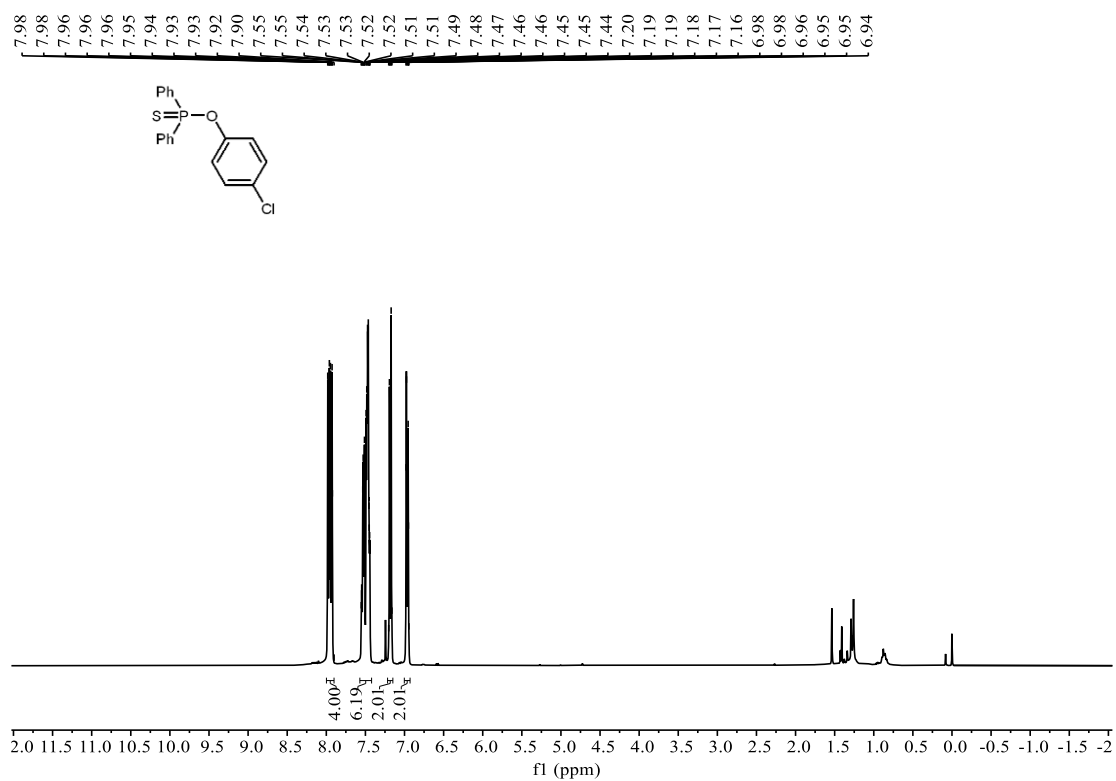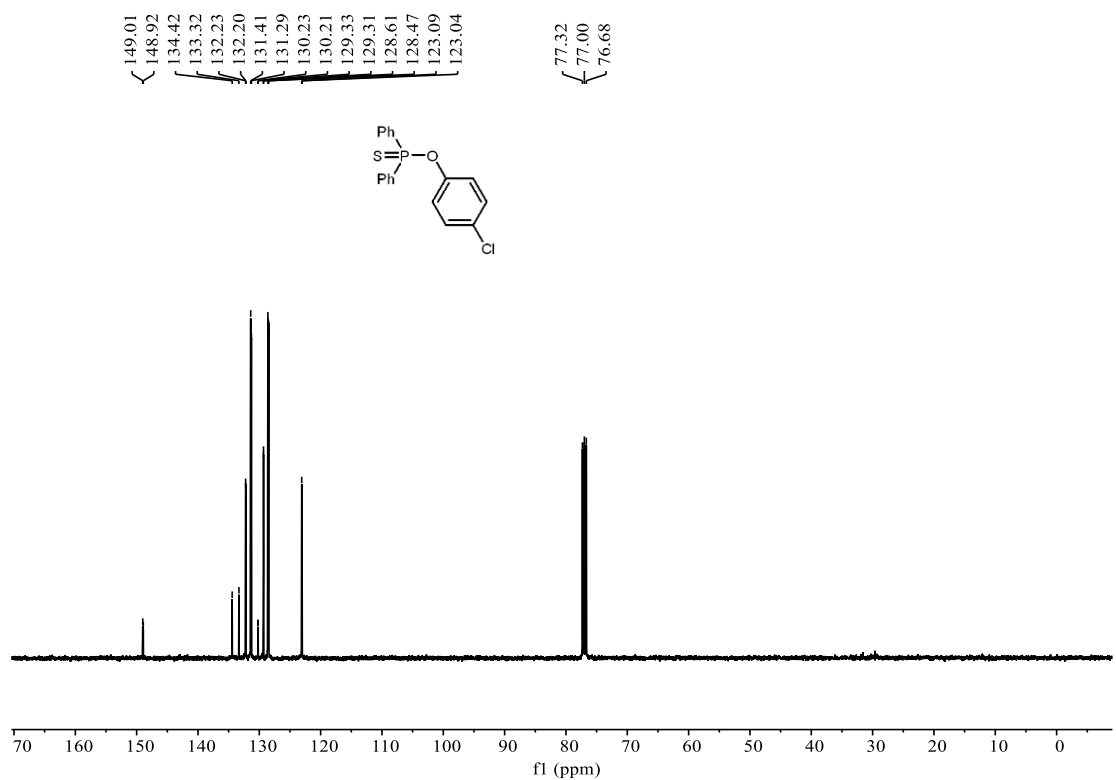

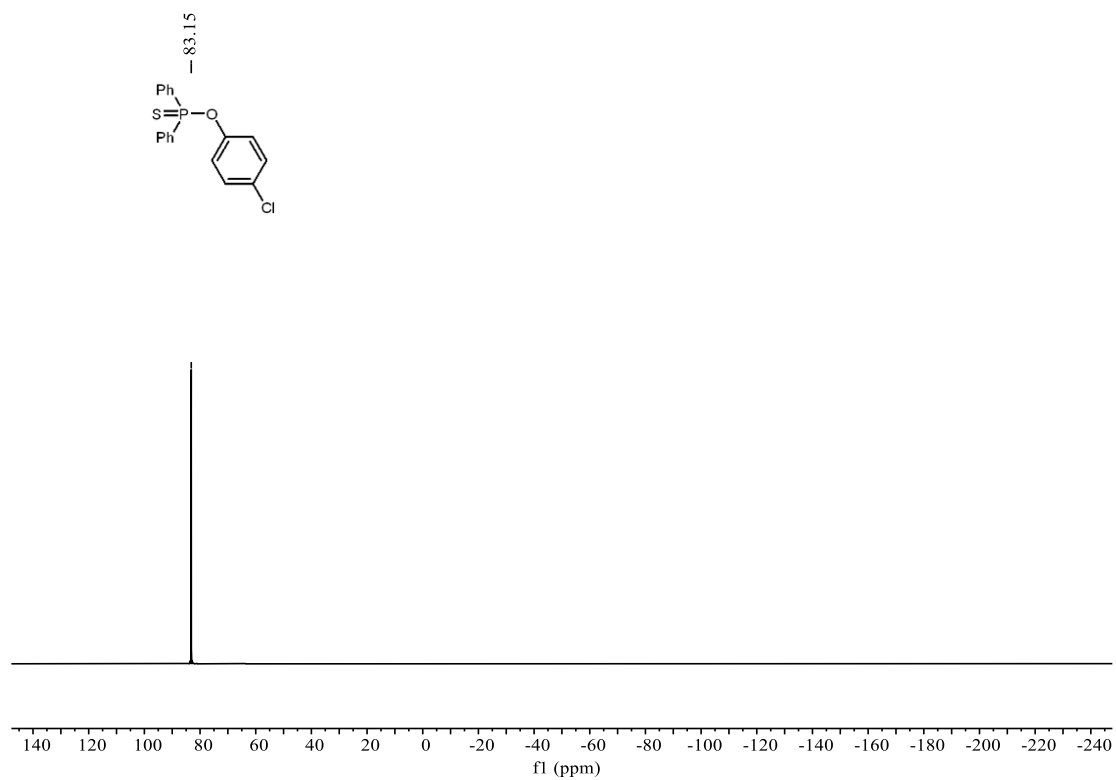

O-(4-fluorophenyl) diphenylphosphinothioate (**3x'**)

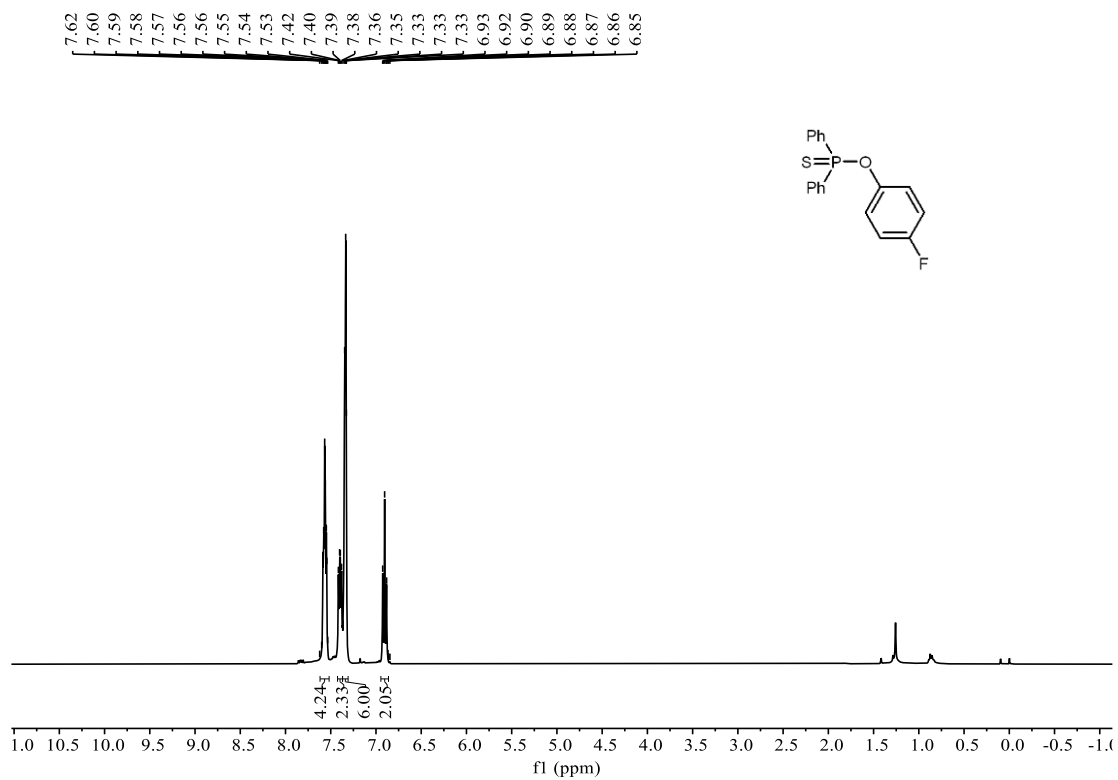

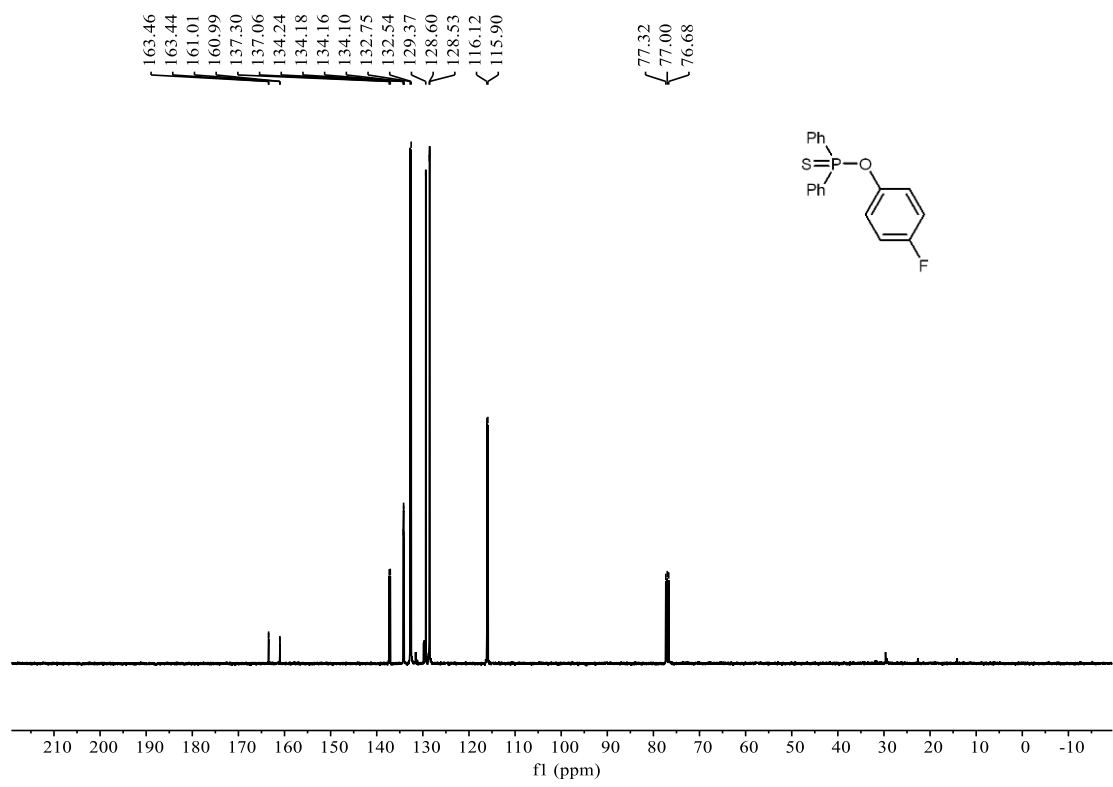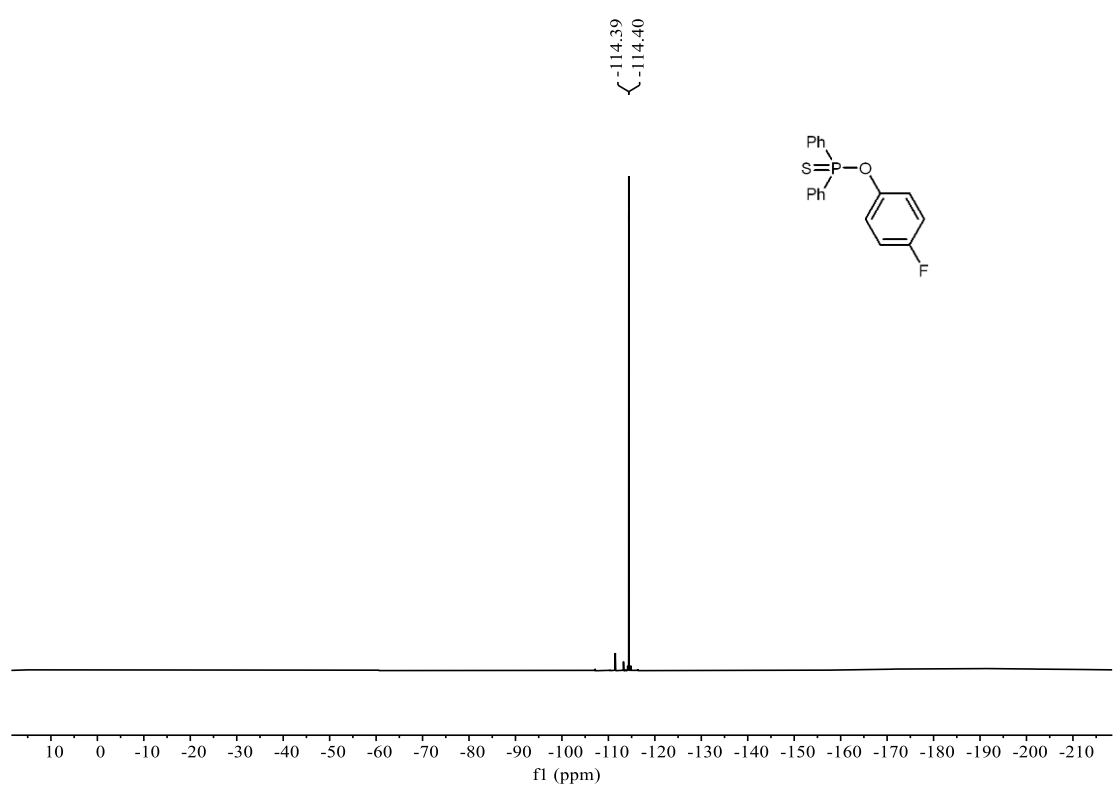

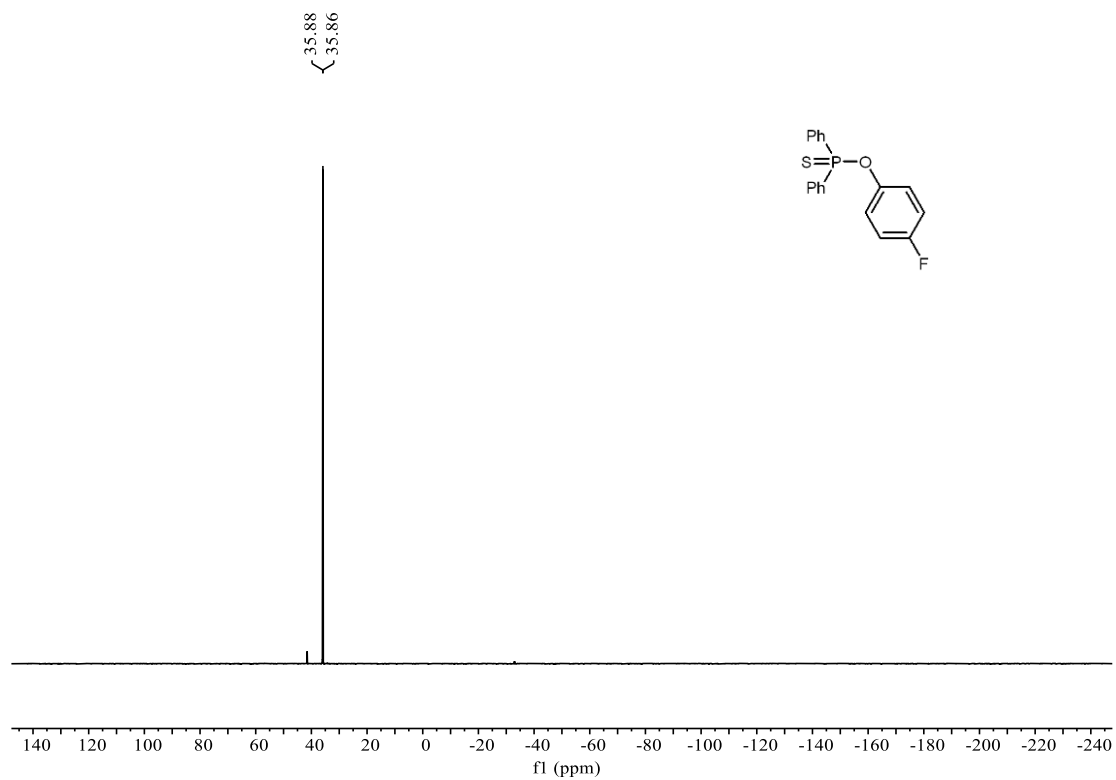

O-([1,1'-biphenyl]-4-yl) diphenylphosphinothioate (**3y'**)

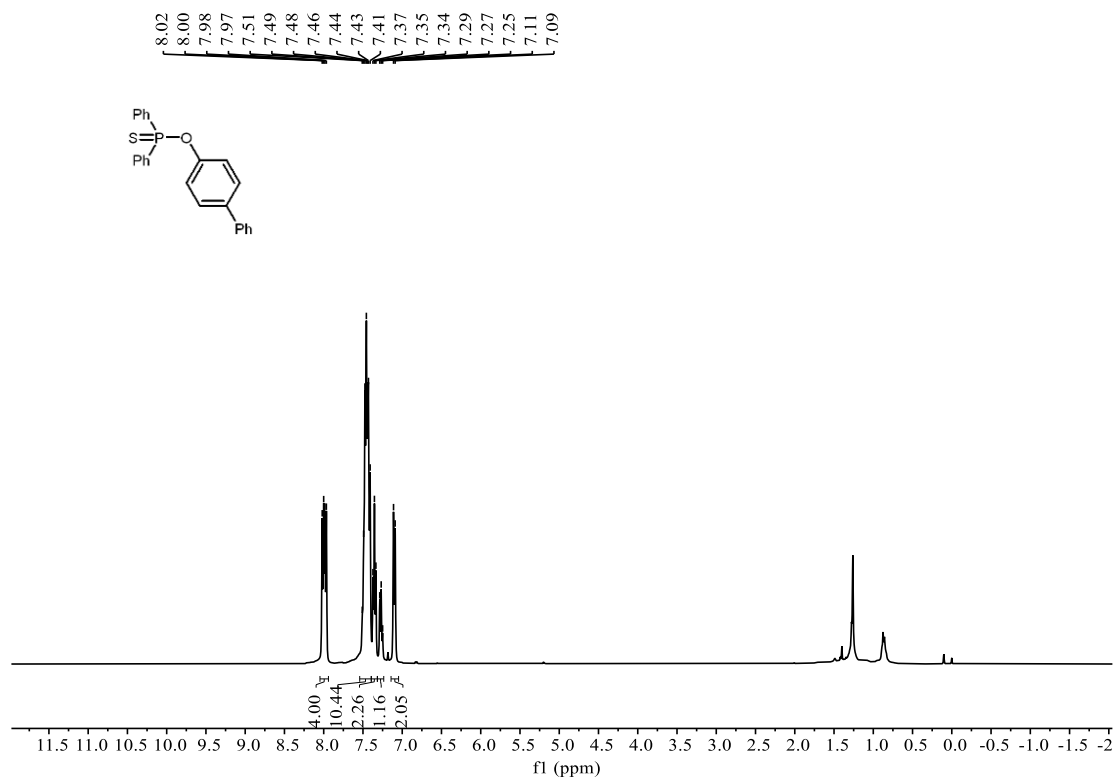

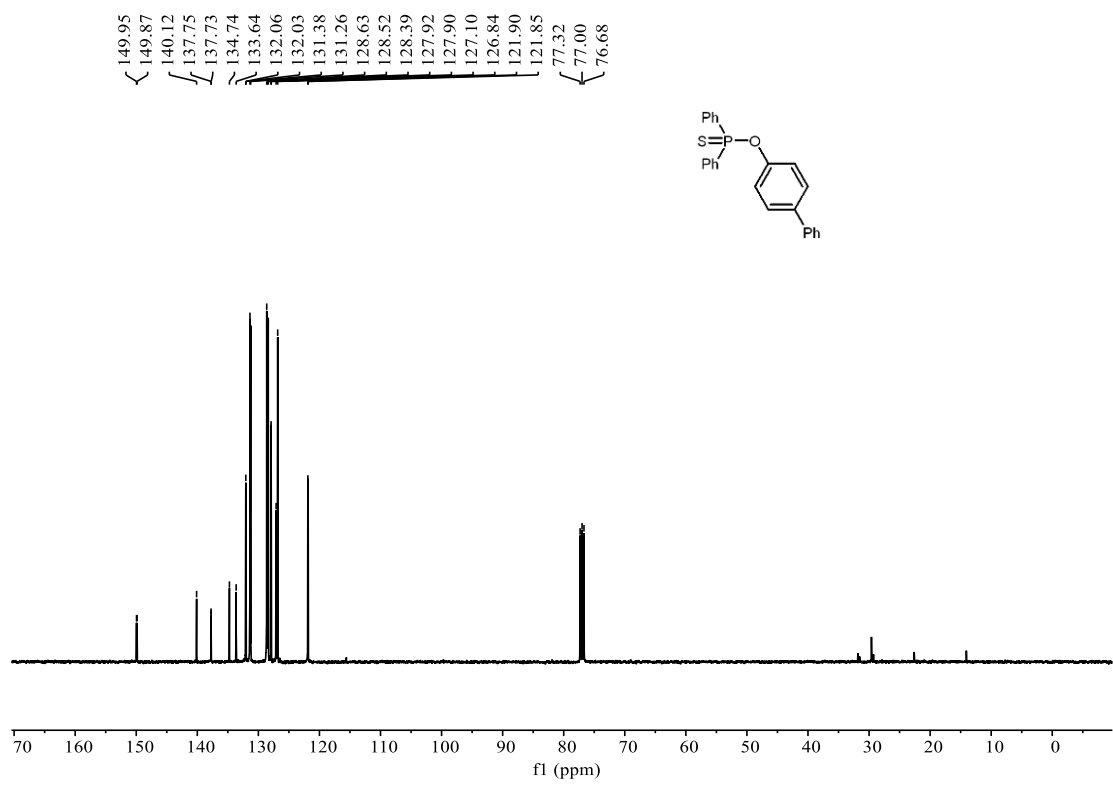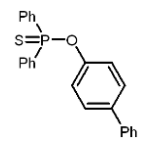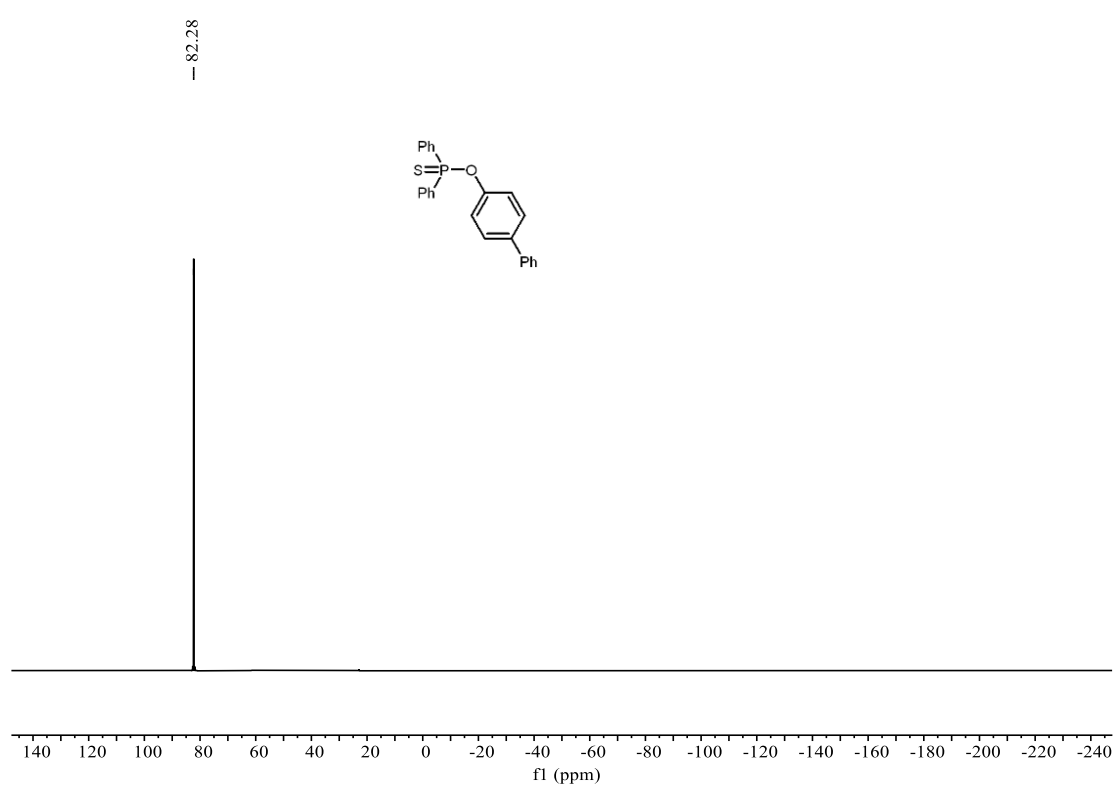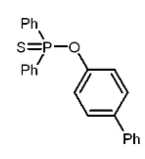



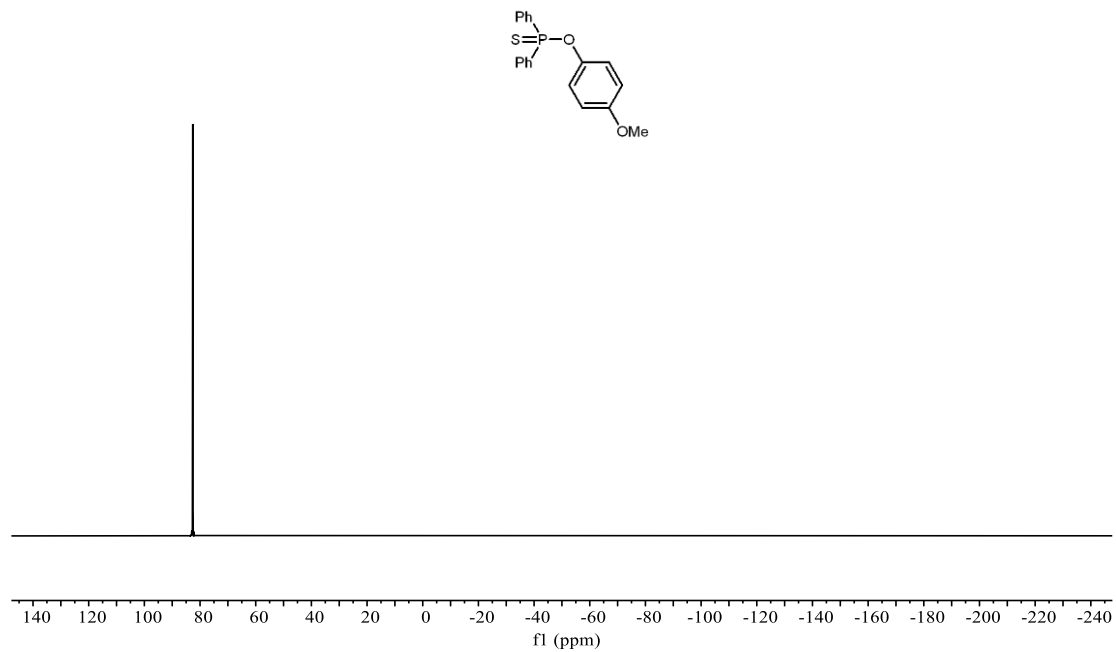

**O-(4-phenoxyphenyl) diphenylphosphinothioate (3aa')**

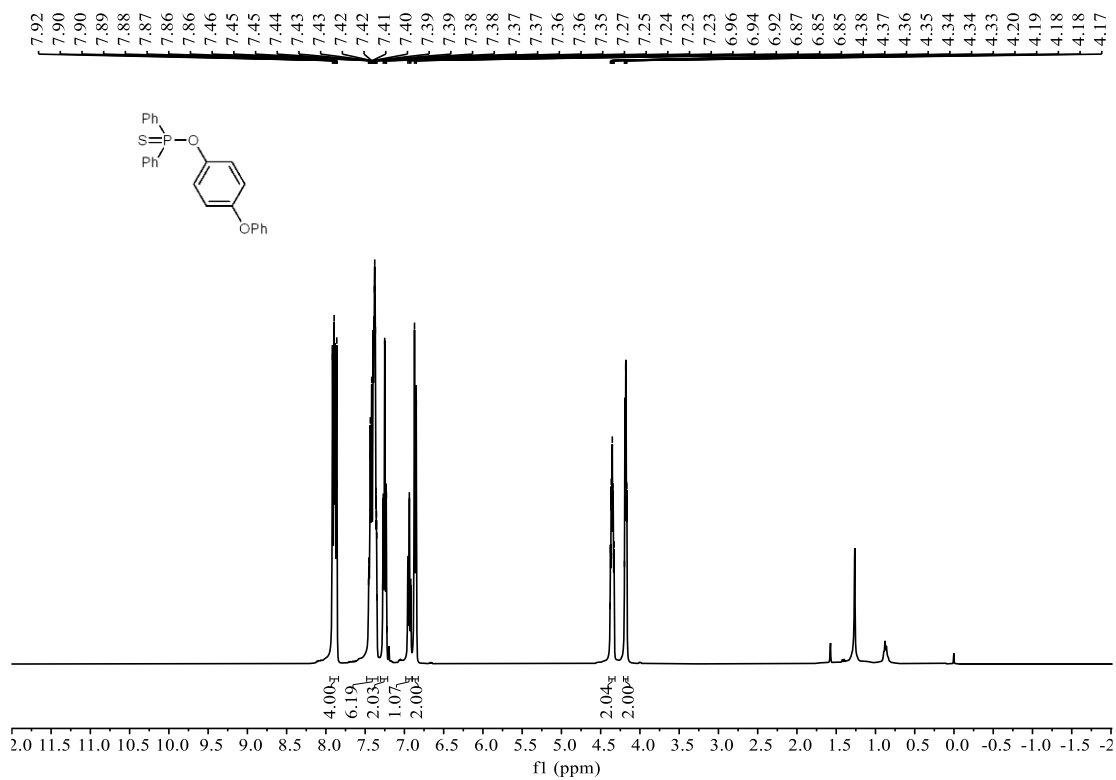

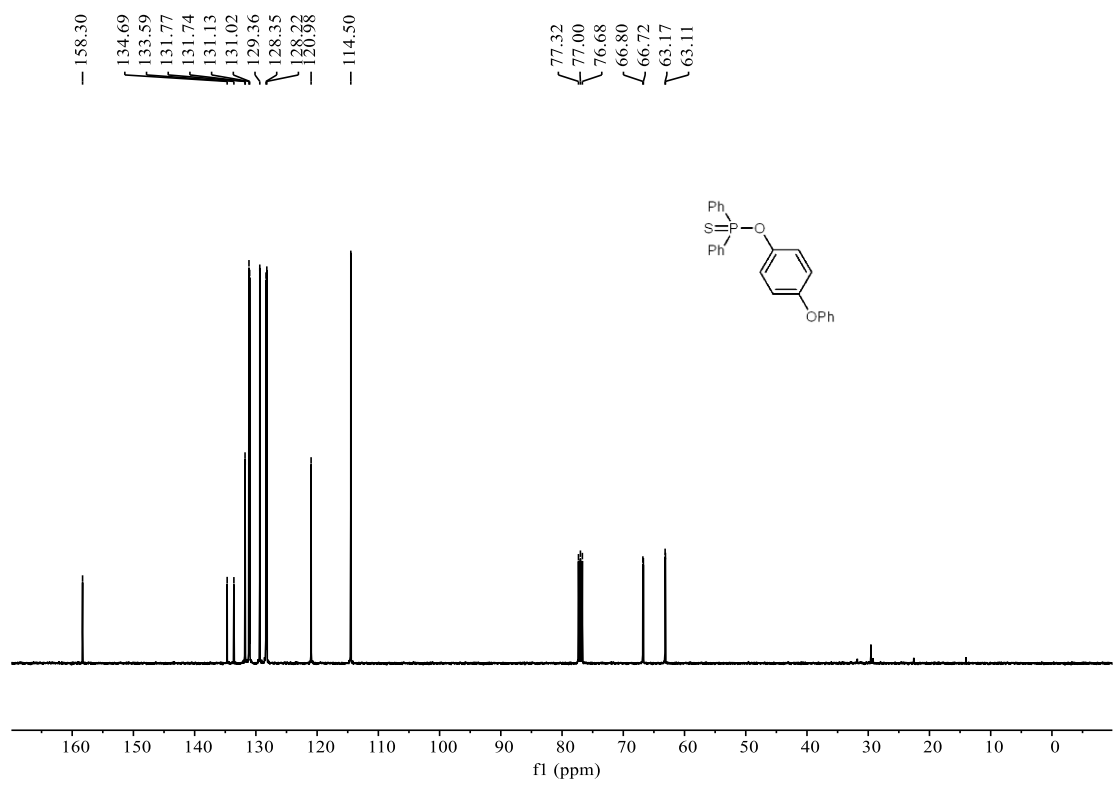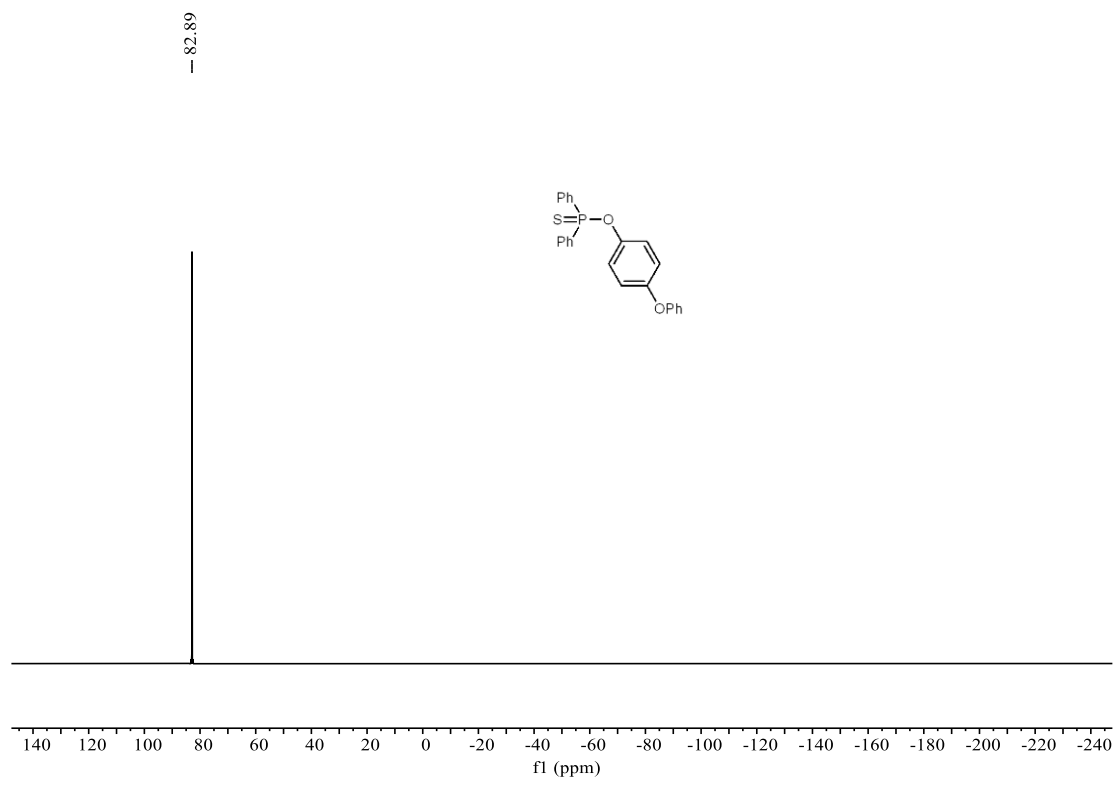

# O-(4-acetamidophenyl) diphenylphosphinothioate (**3ab'**)

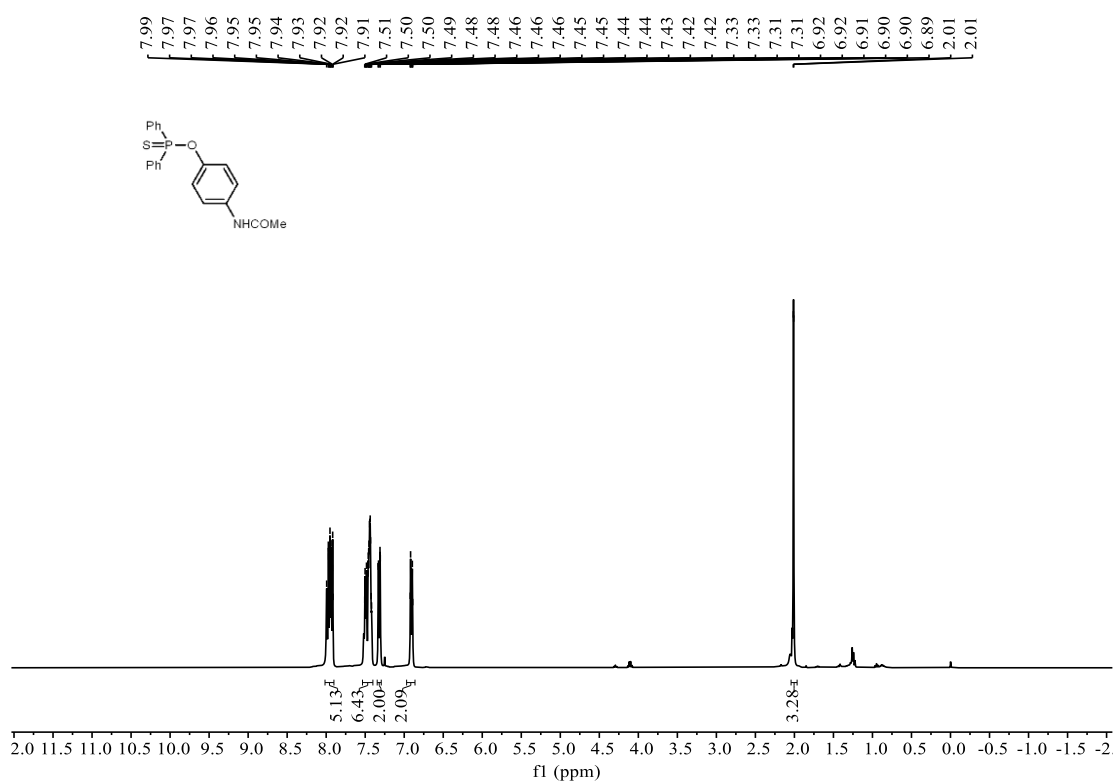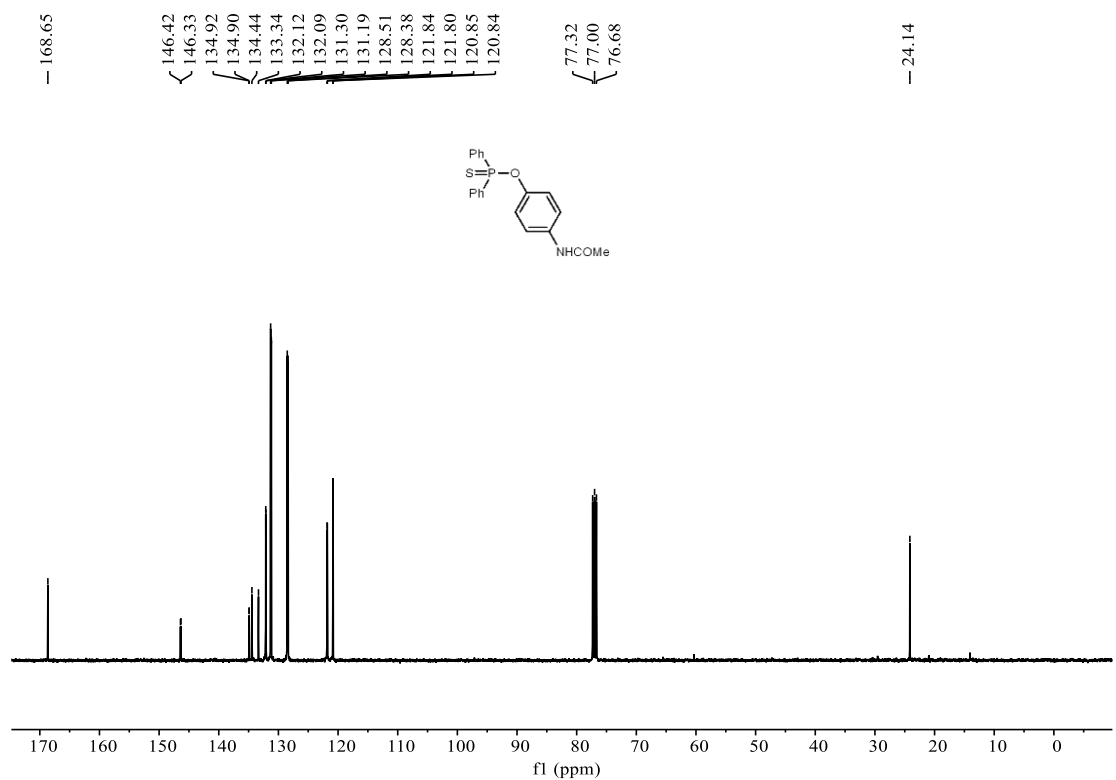

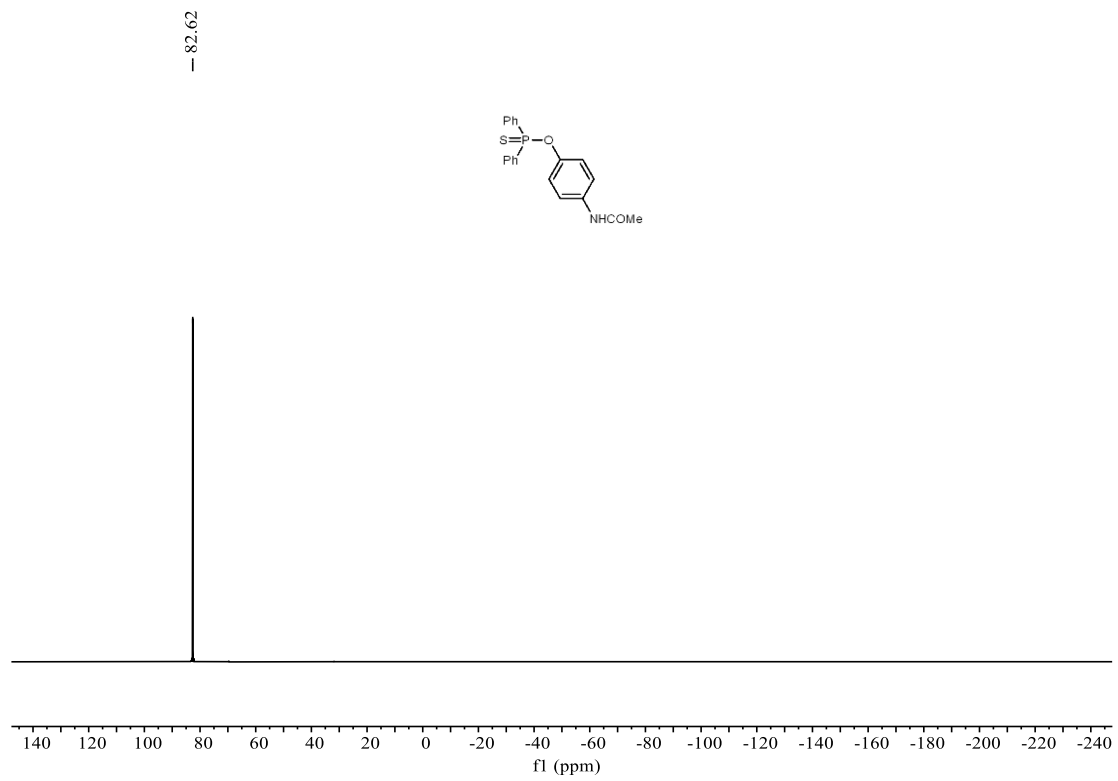

O-(4-cyanophenyl) diphenylphosphinothioate (**3ac'**)

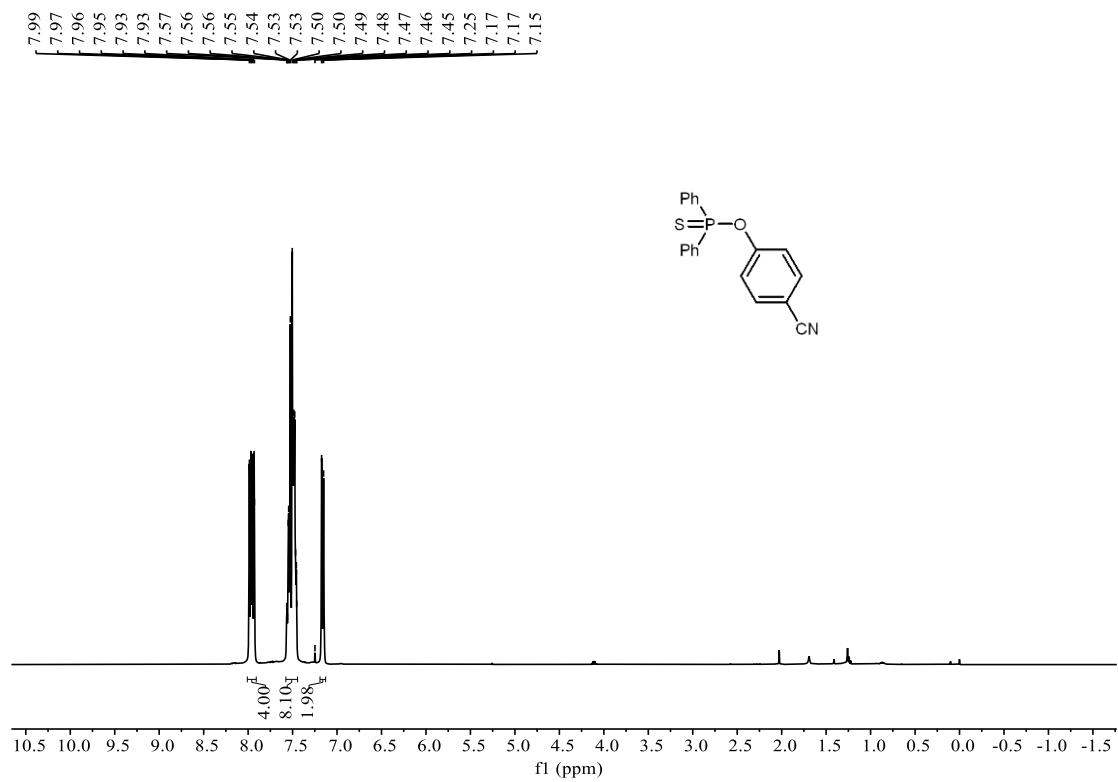

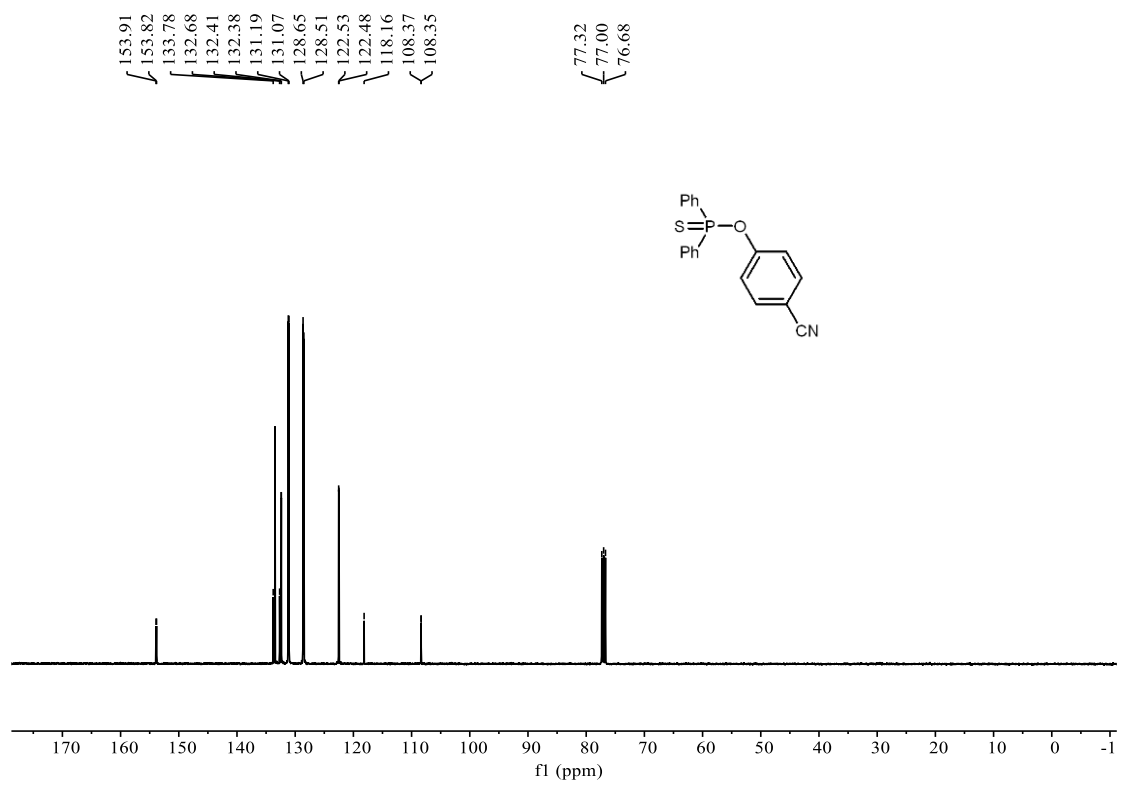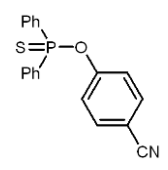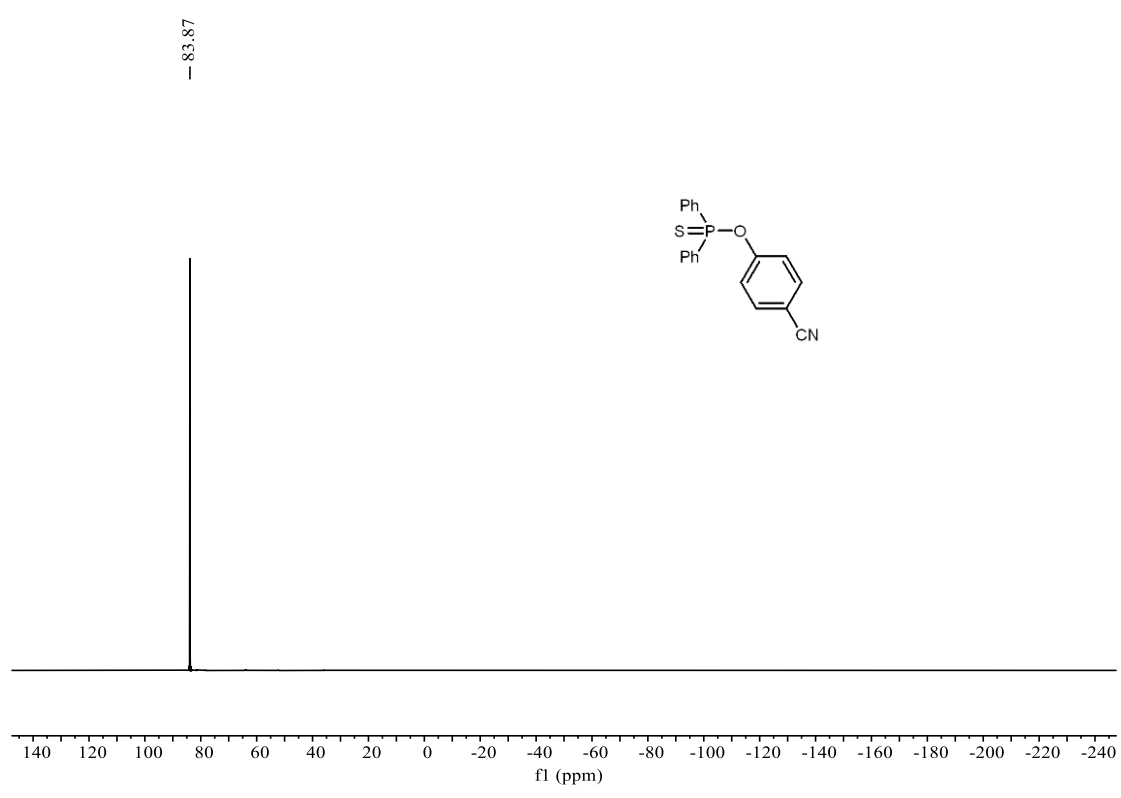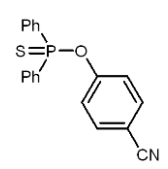

O-(4-(trifluoromethyl)phenyl) diphenylphosphinothioate (**3ad'**)

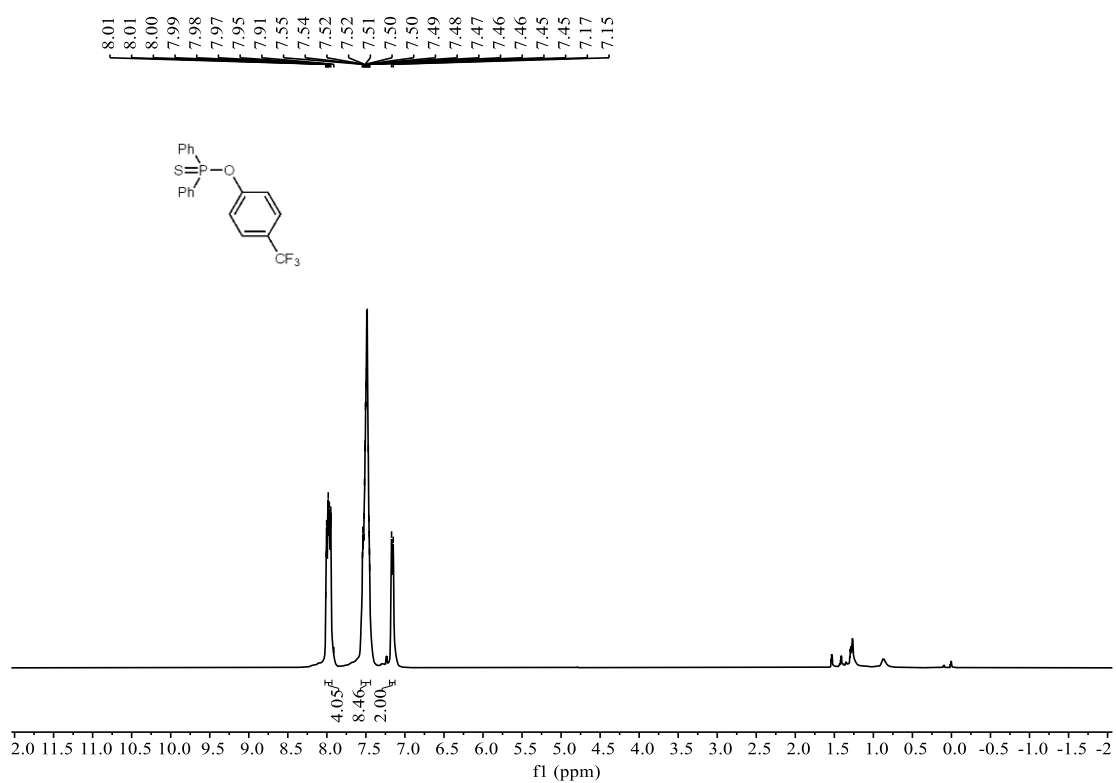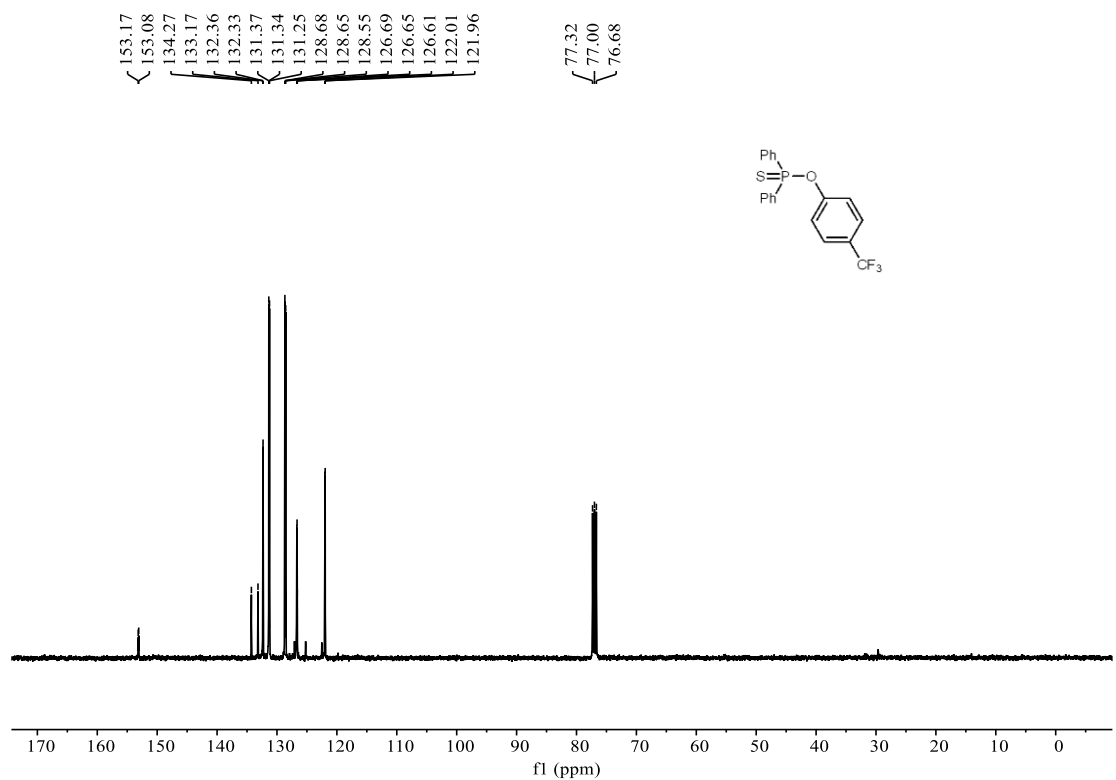

-83.26

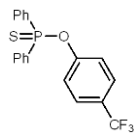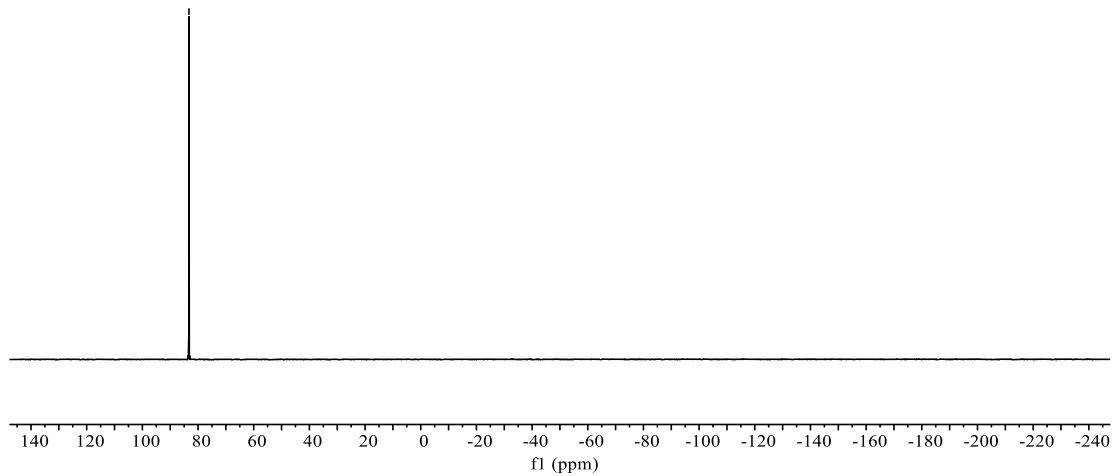

-62.02

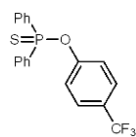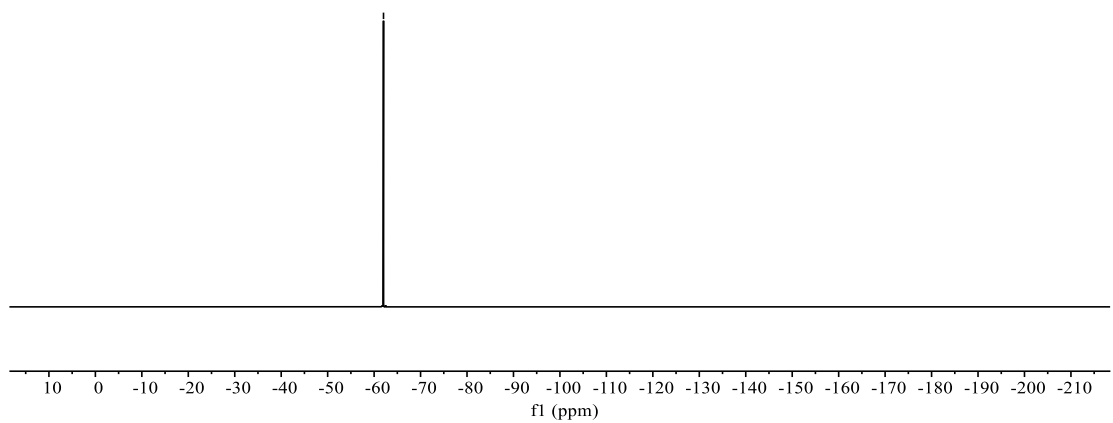

# O-(3-bromophenyl) diphenylphosphinothioate (**3ae'**)

7.97  
7.96  
7.95  
7.94  
7.92  
7.92  
7.53  
7.52  
7.51  
7.50  
7.49  
7.48  
7.47  
7.46  
7.45  
7.44  
7.43  
7.42  
7.42  
7.22  
7.20  
7.20  
7.07  
7.05  
7.03  
6.99  
6.99  
6.98  
6.97  
6.97  
6.96

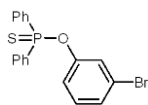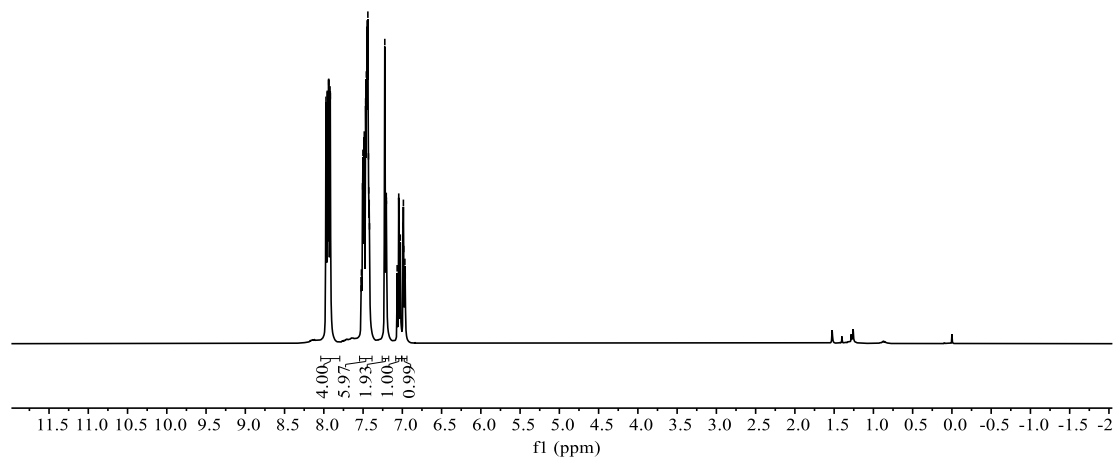

150.96  
150.88  
134.30  
133.20  
132.21  
132.18  
131.28  
131.16  
130.20  
130.19  
128.56  
128.42  
127.94  
127.92  
125.10  
125.05  
122.15  
122.14  
120.41  
120.36  
77.32  
77.00  
76.68

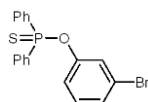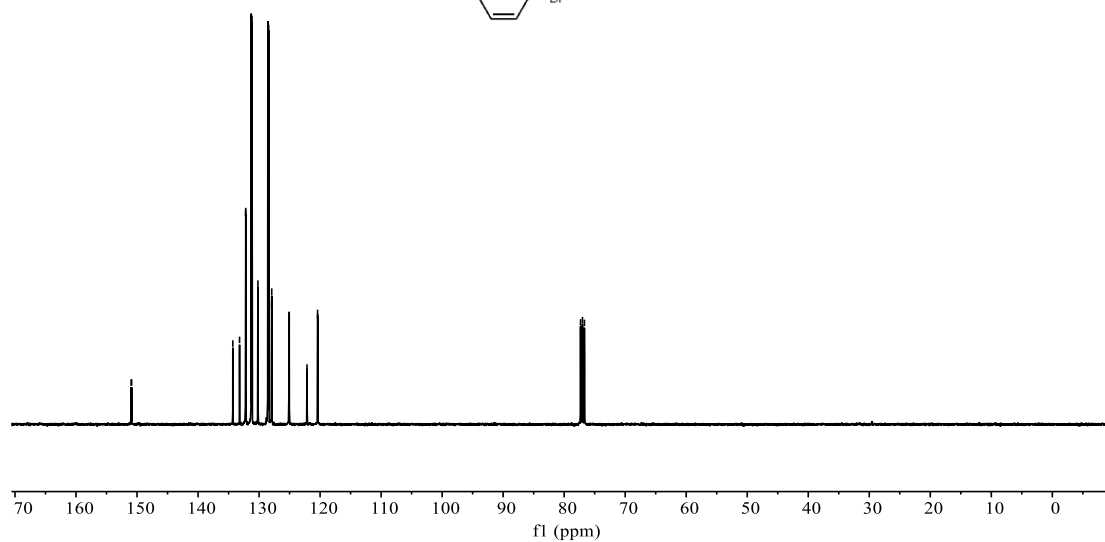

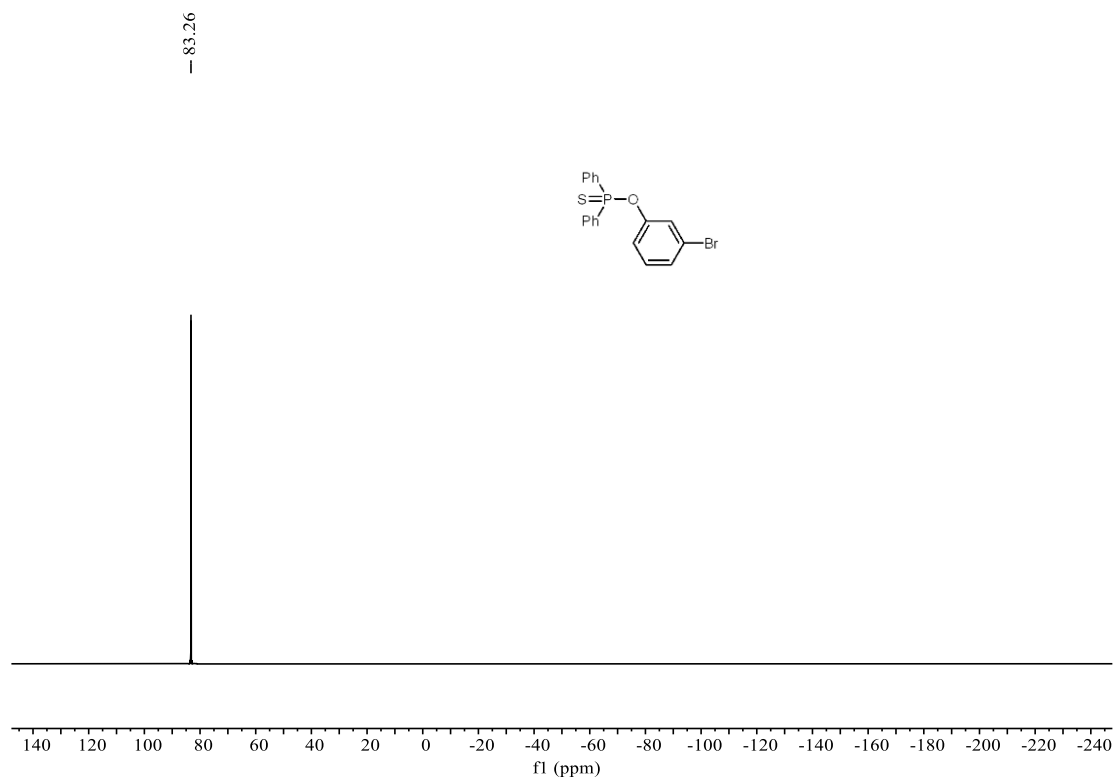

**O-(2-allylphenyl) diphenylphosphinothioate (3af')**

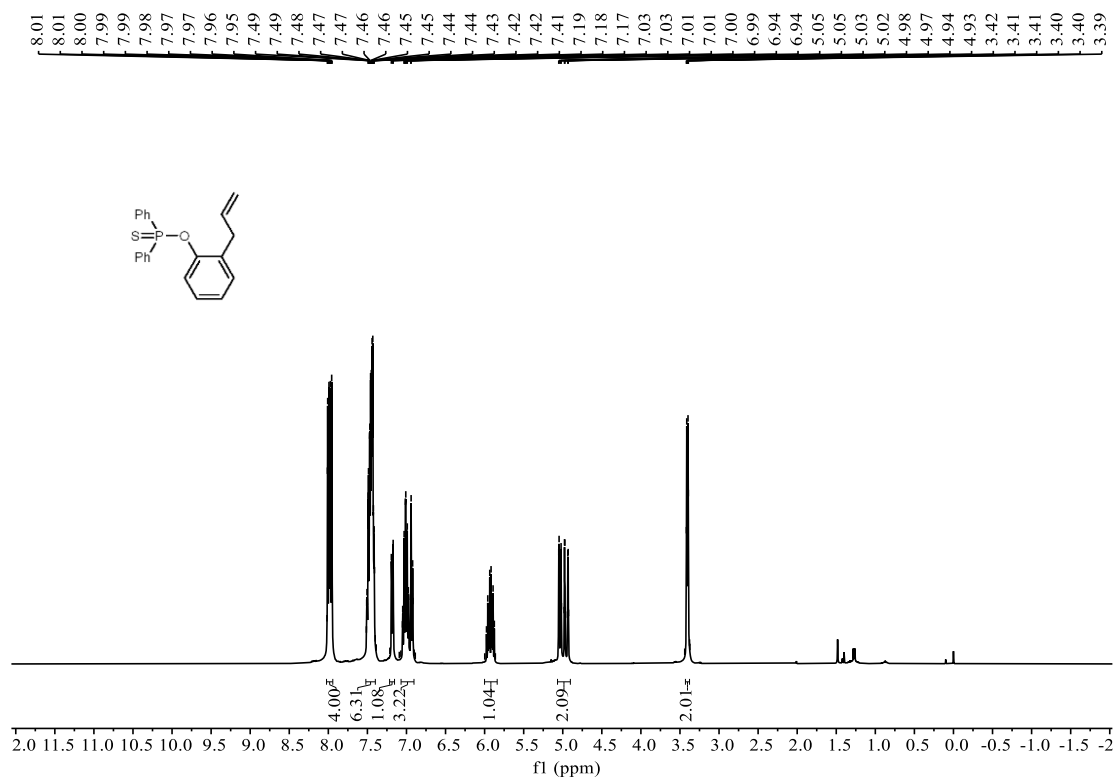

8.01  
8.01  
8.00  
7.99  
7.99  
7.98  
7.97  
7.97  
7.96  
7.95  
7.49  
7.49  
7.48  
7.47  
7.47  
7.46  
7.46  
7.45  
7.45  
7.44  
7.44  
7.43  
7.42  
7.42  
7.41  
7.19  
7.18  
7.17  
7.03  
7.03  
7.01  
7.01  
7.00  
6.99  
6.99  
6.94  
6.94  
5.05  
5.05  
5.03  
5.02  
4.98  
4.97  
4.94  
4.93  
3.42  
3.41  
3.41  
3.40  
3.40  
3.39

4.00  
6.31  
1.08  
3.22  
1.04  
2.09  
2.01

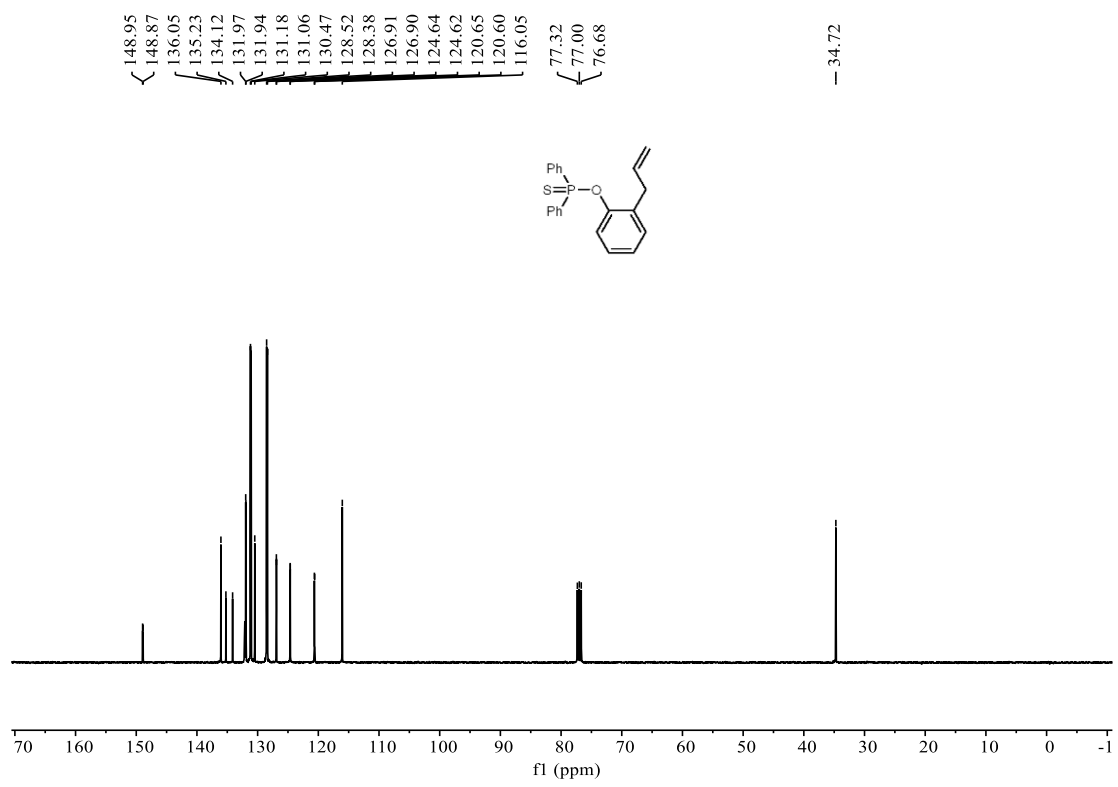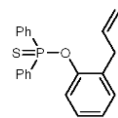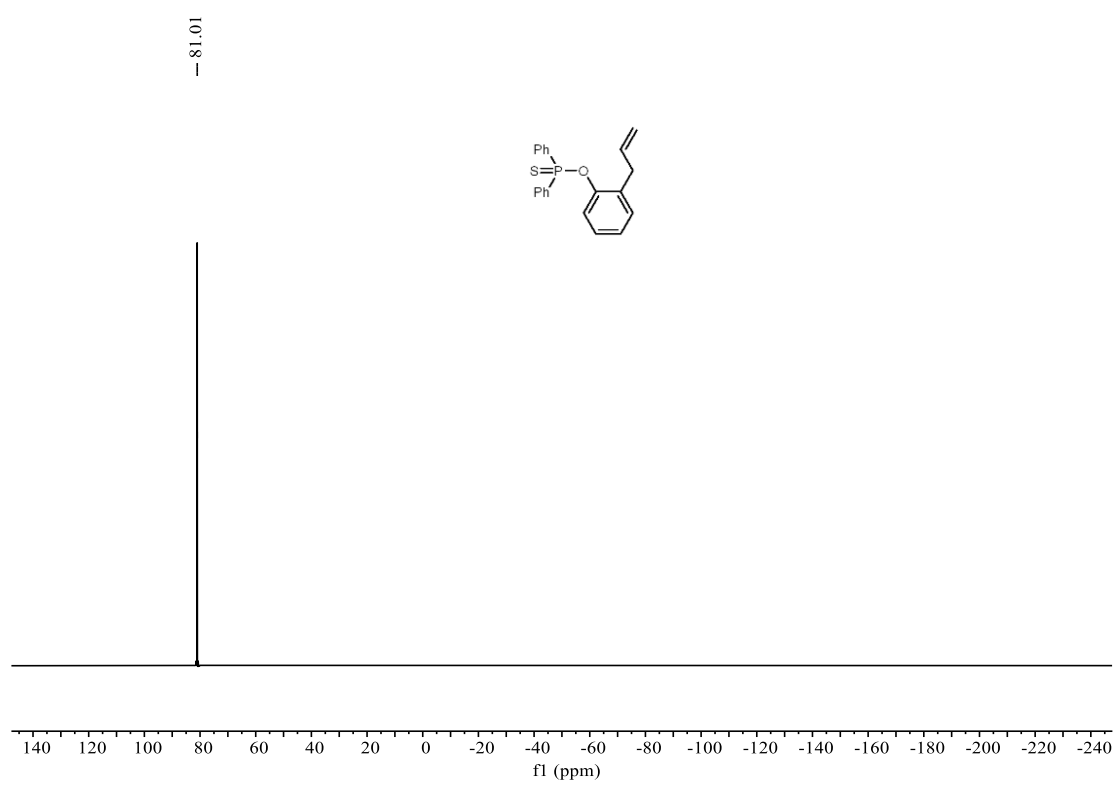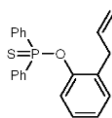

O-(4-chloro-3-methylphenyl) diphenylphosphinothioate (**3ag'**)

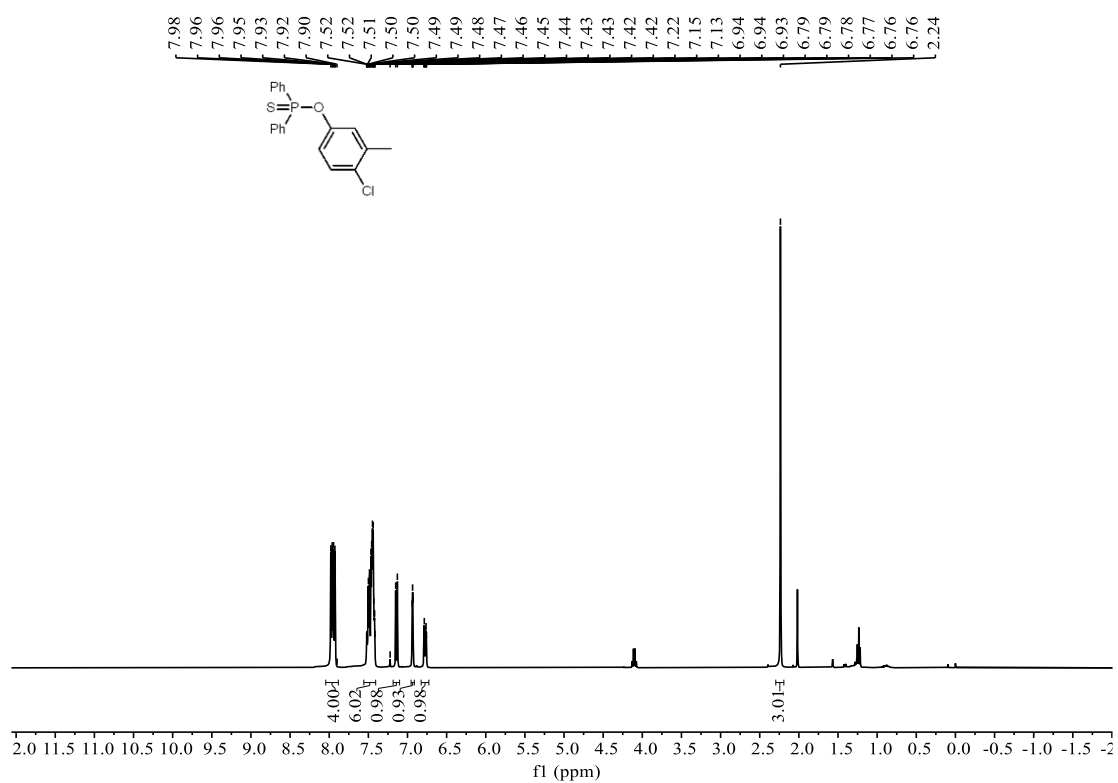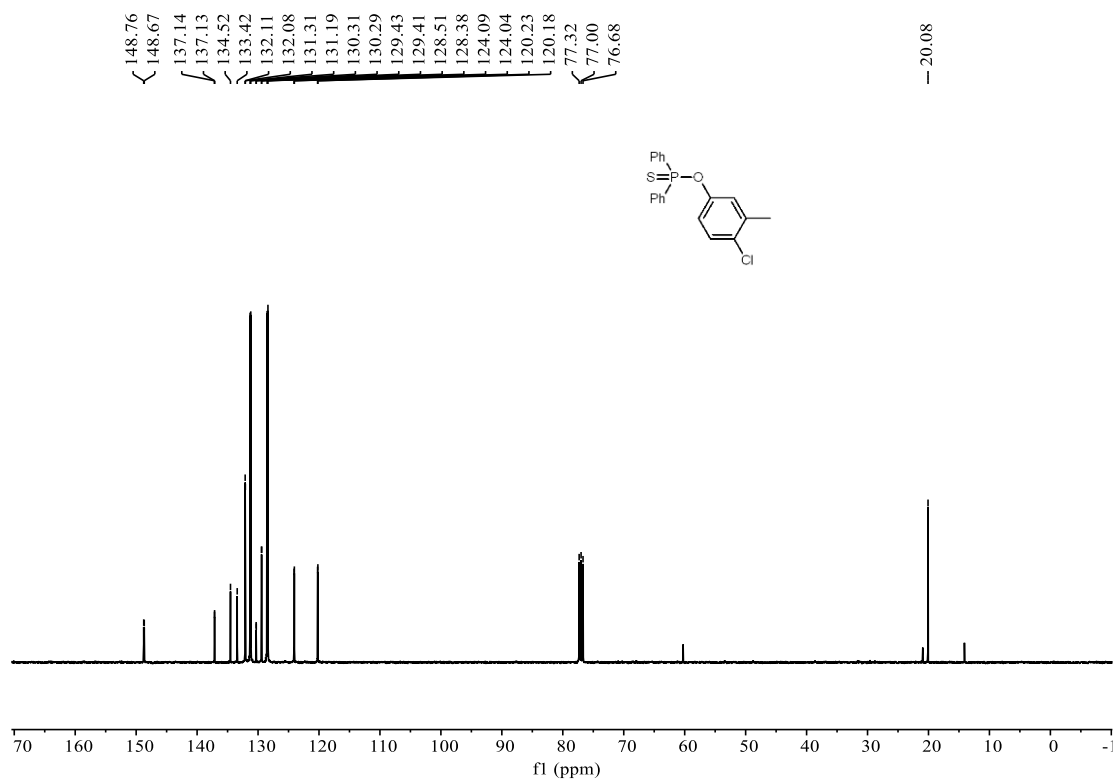

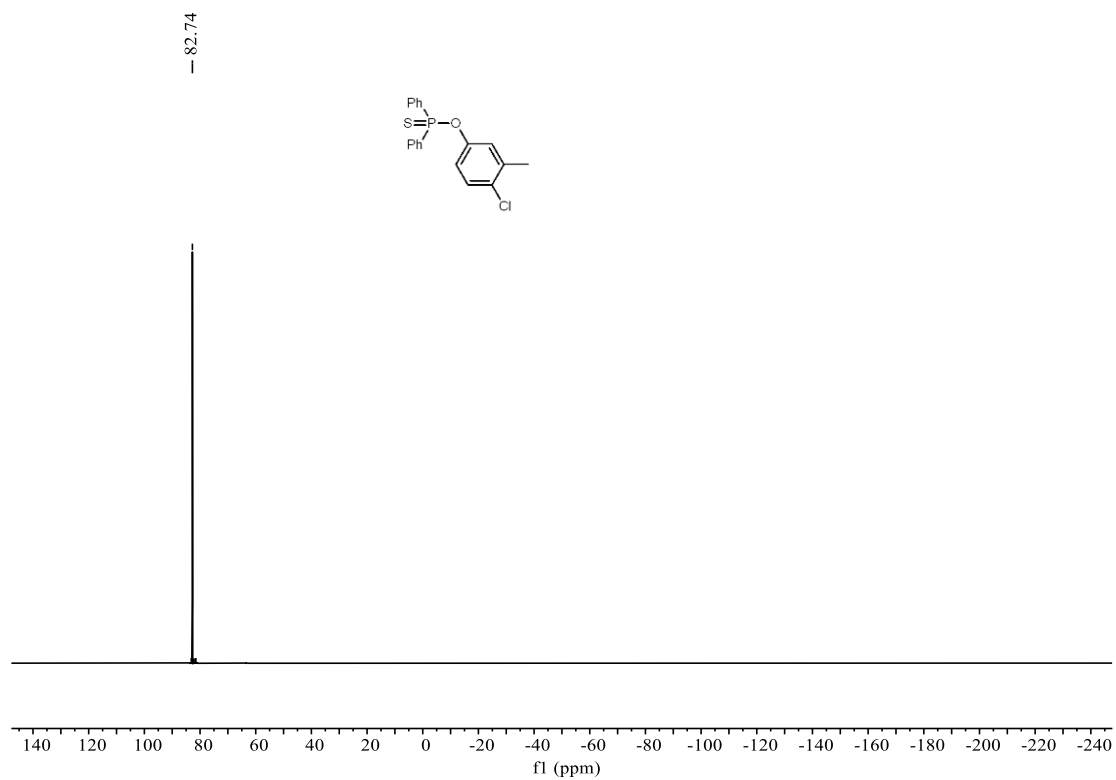

**O-(3,5-dibromophenyl) diphenylphosphinothioate (3ah')**

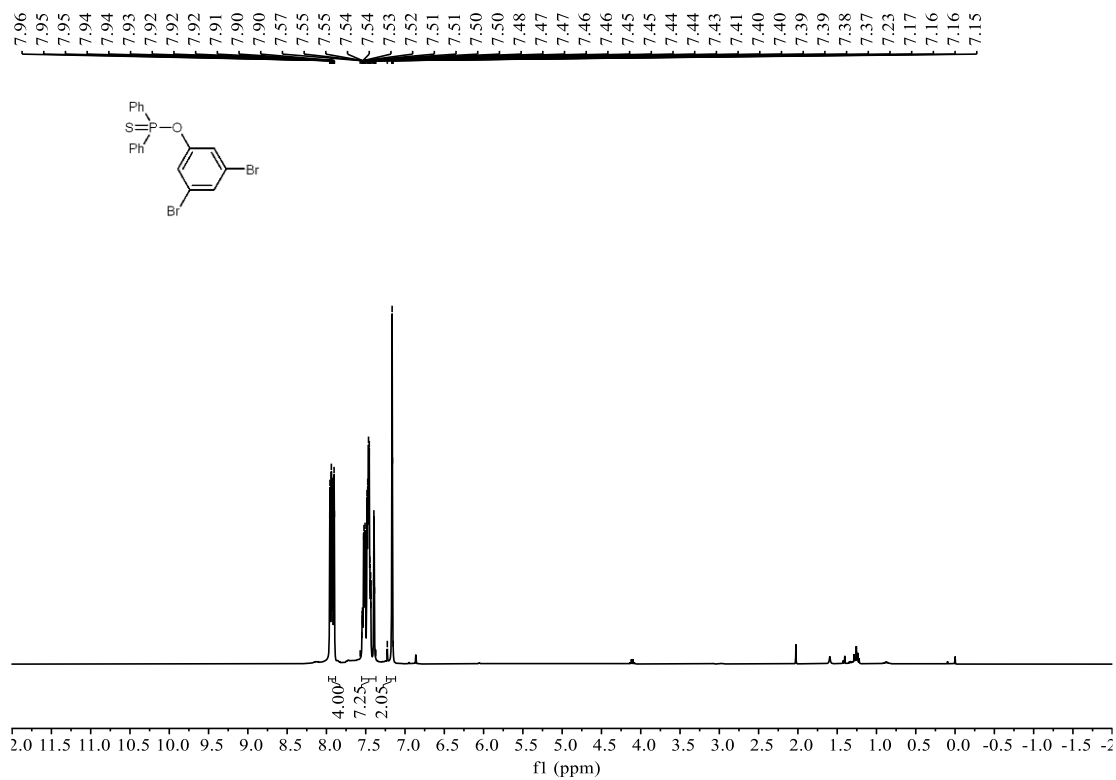

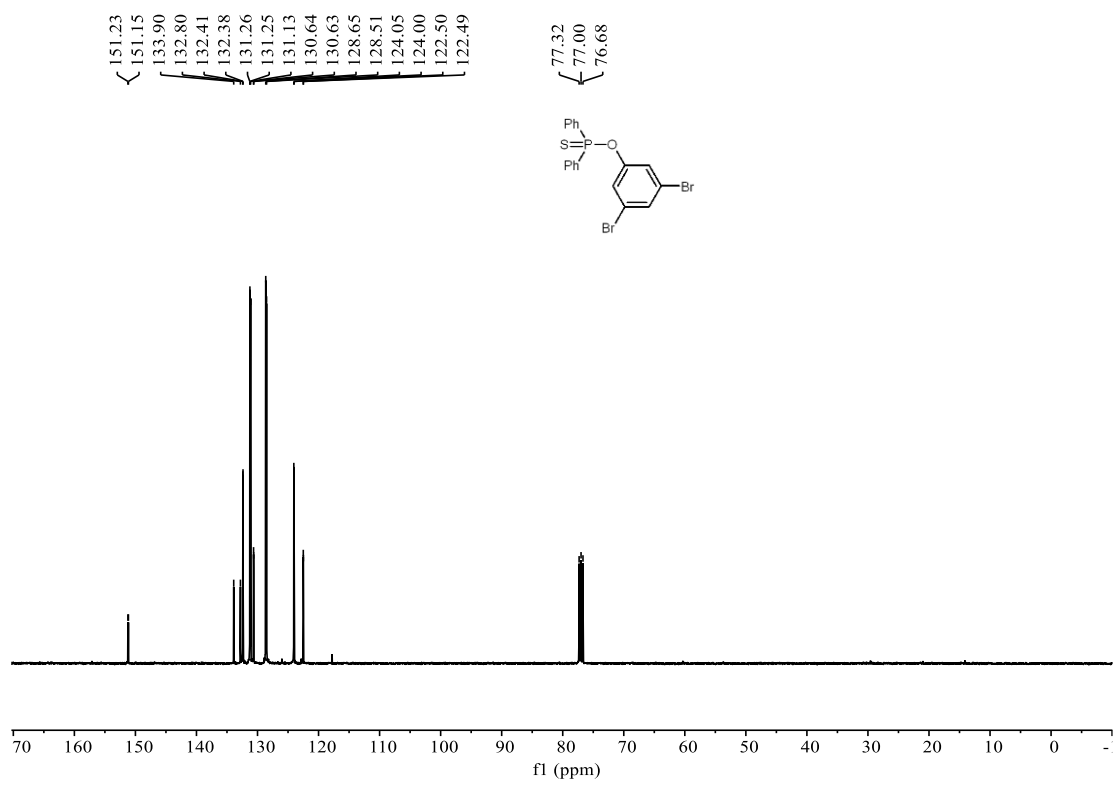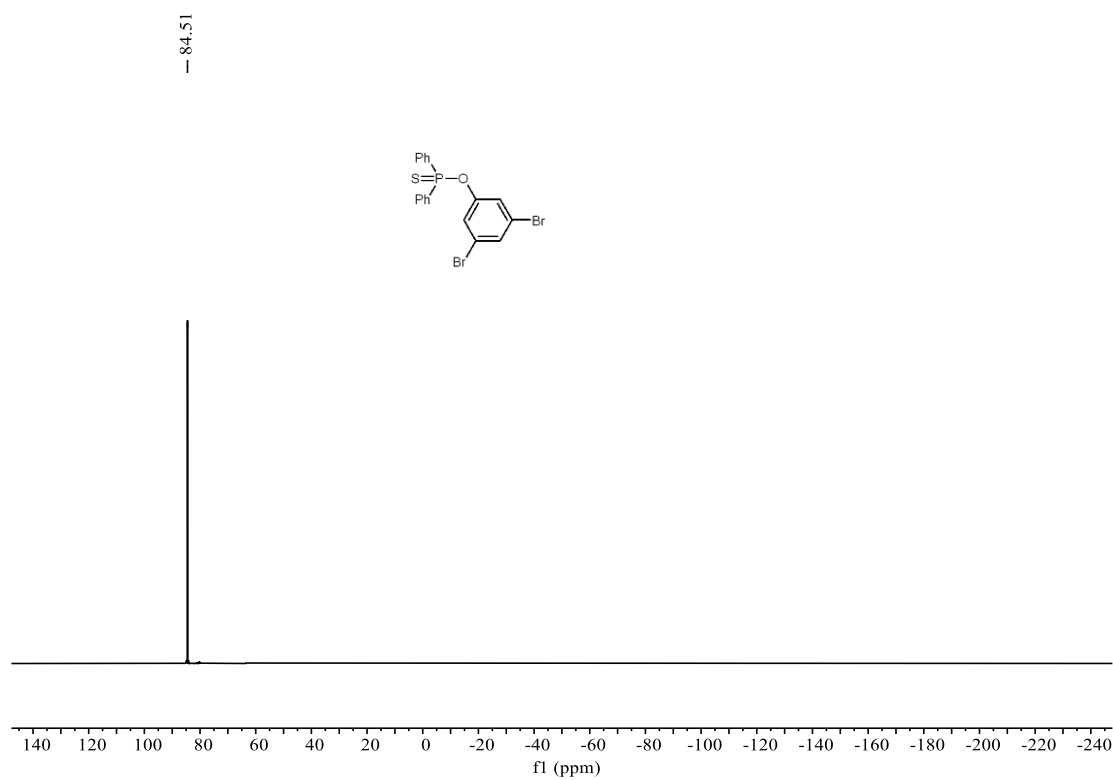

O-(naphthalen-2-yl) diphenylphosphinothioate (**3ai'**)

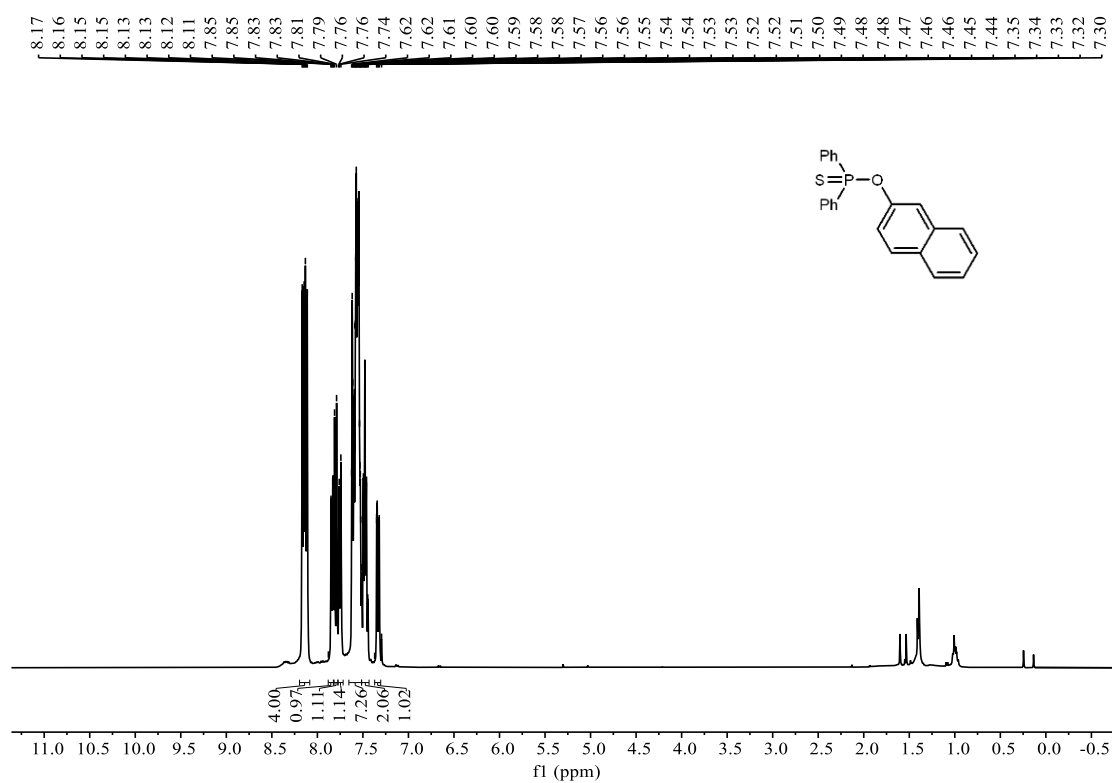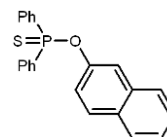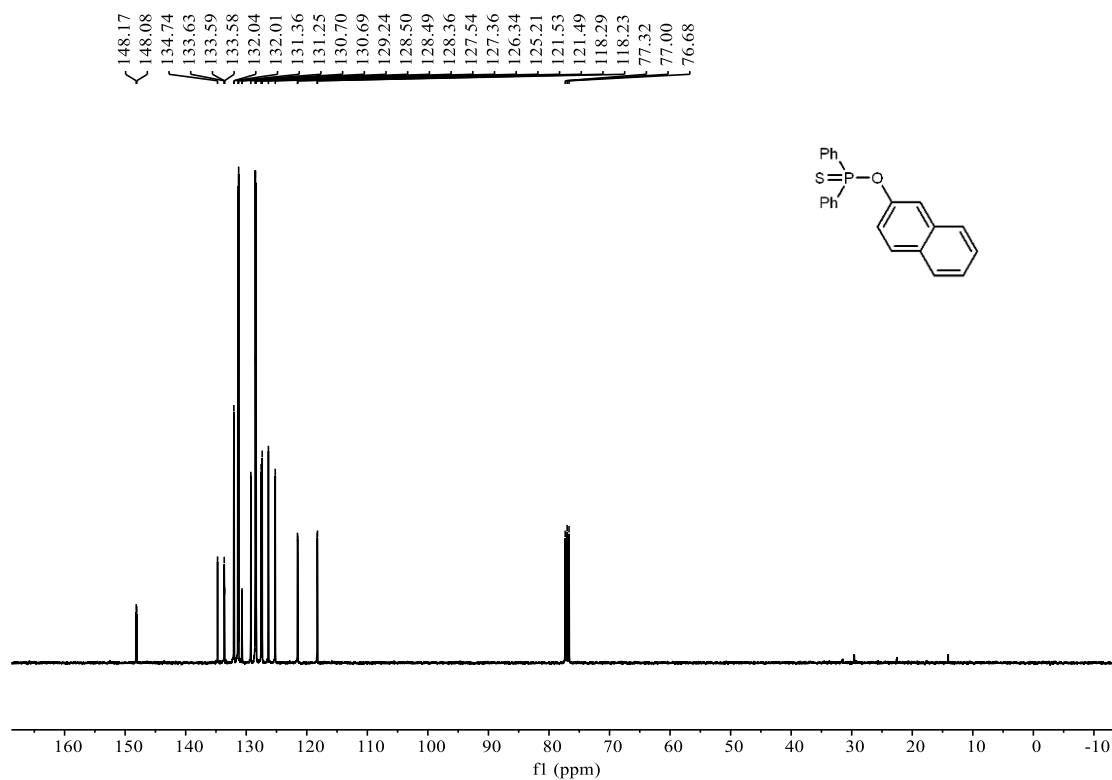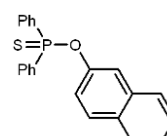

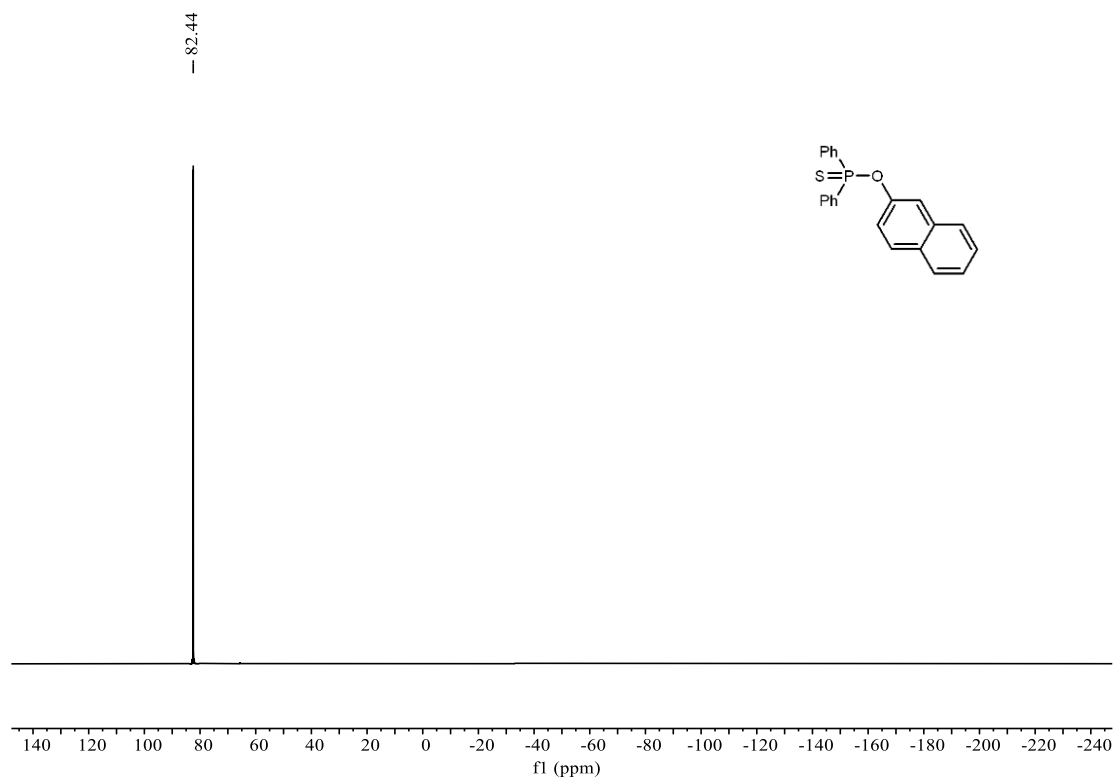

O-ethyl diphenylphosphinothioate (**3aj'**)

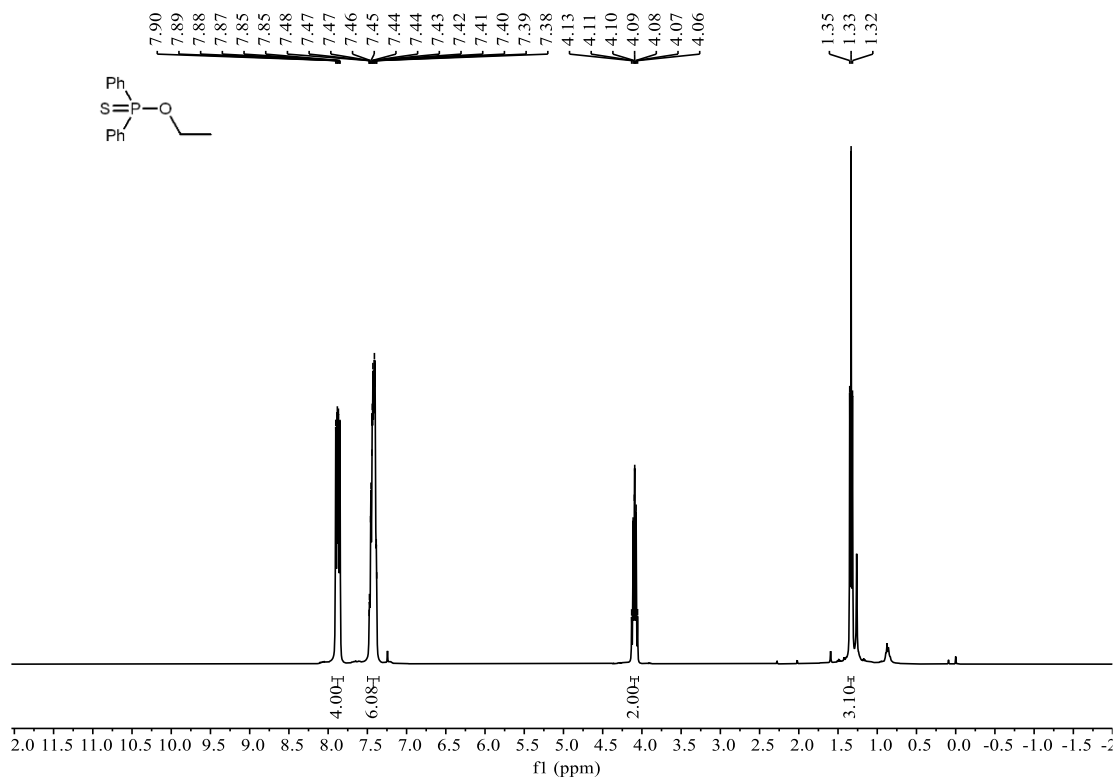

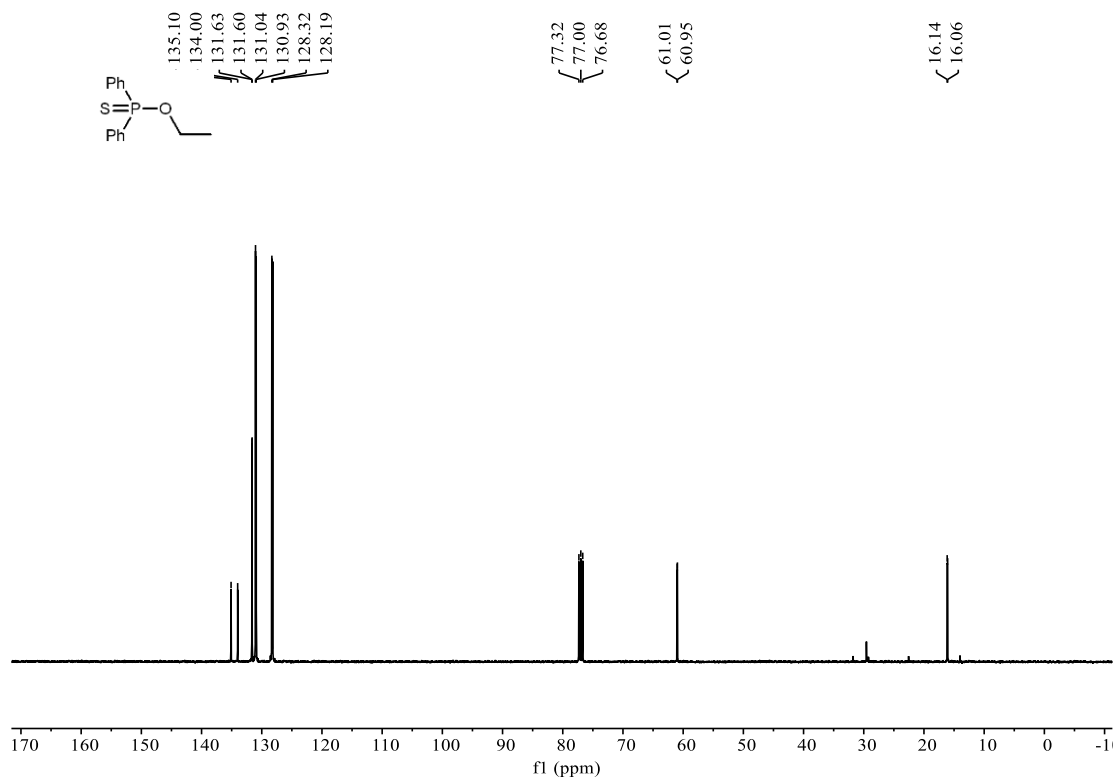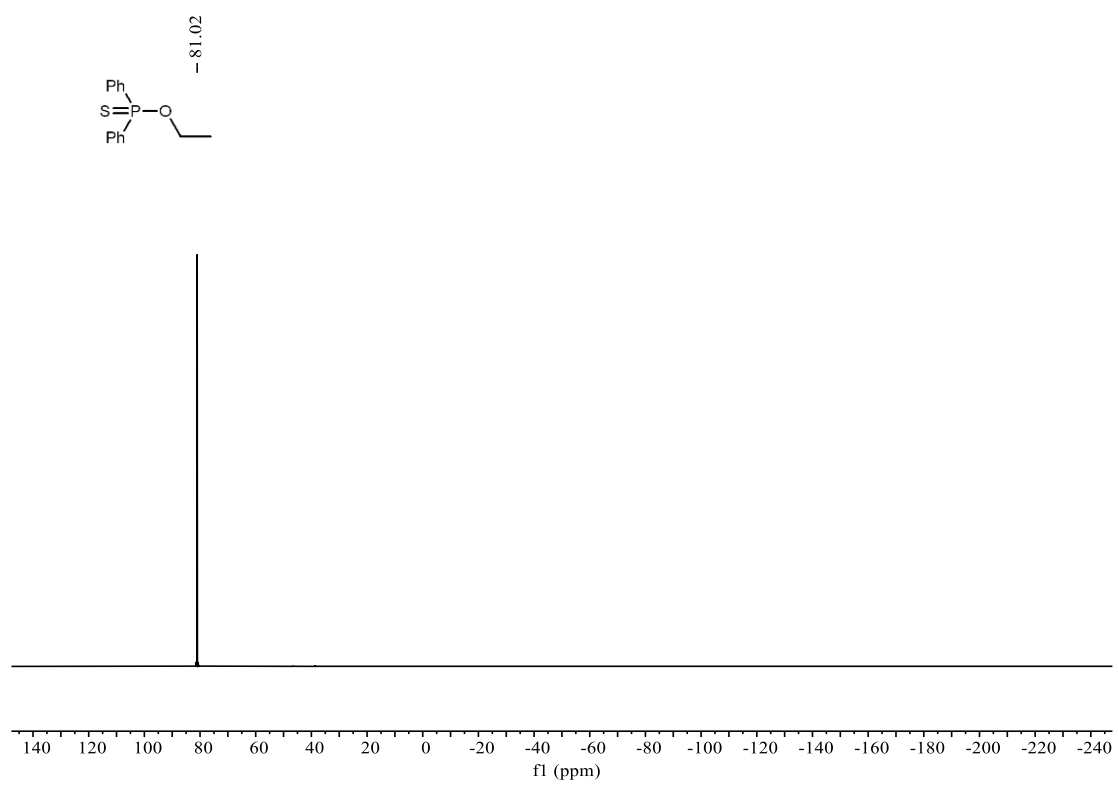

O-butyl diphenylphosphinothioate (**3ak'**)

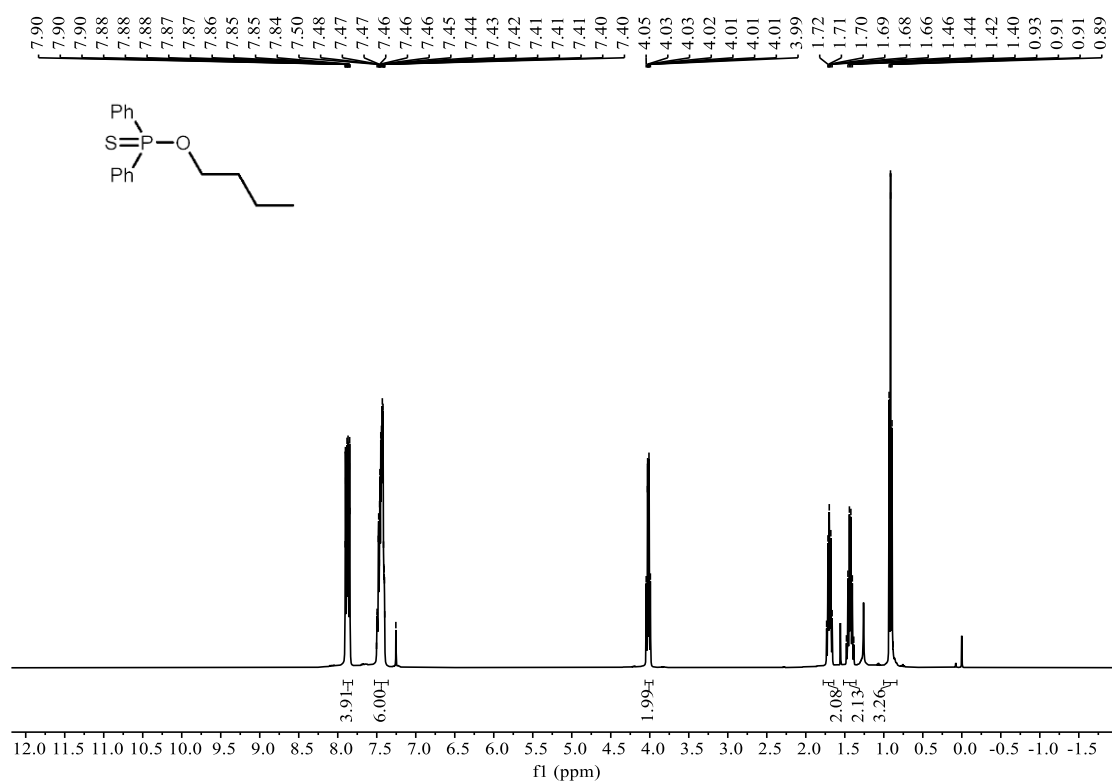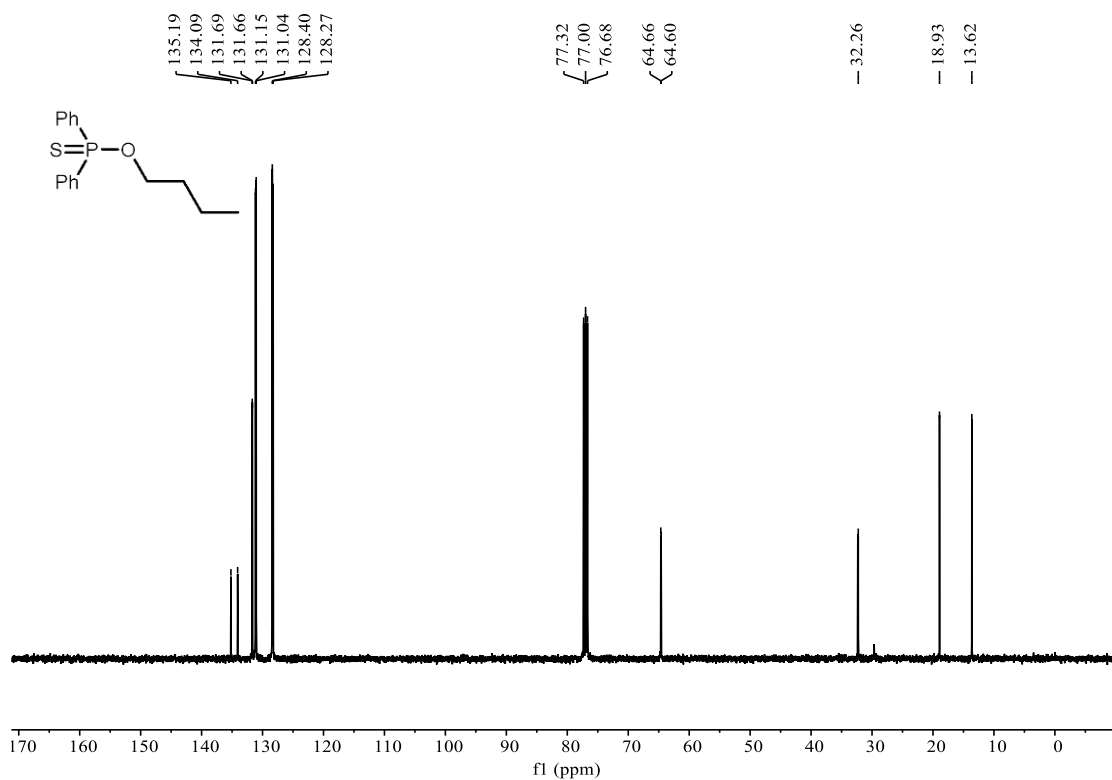

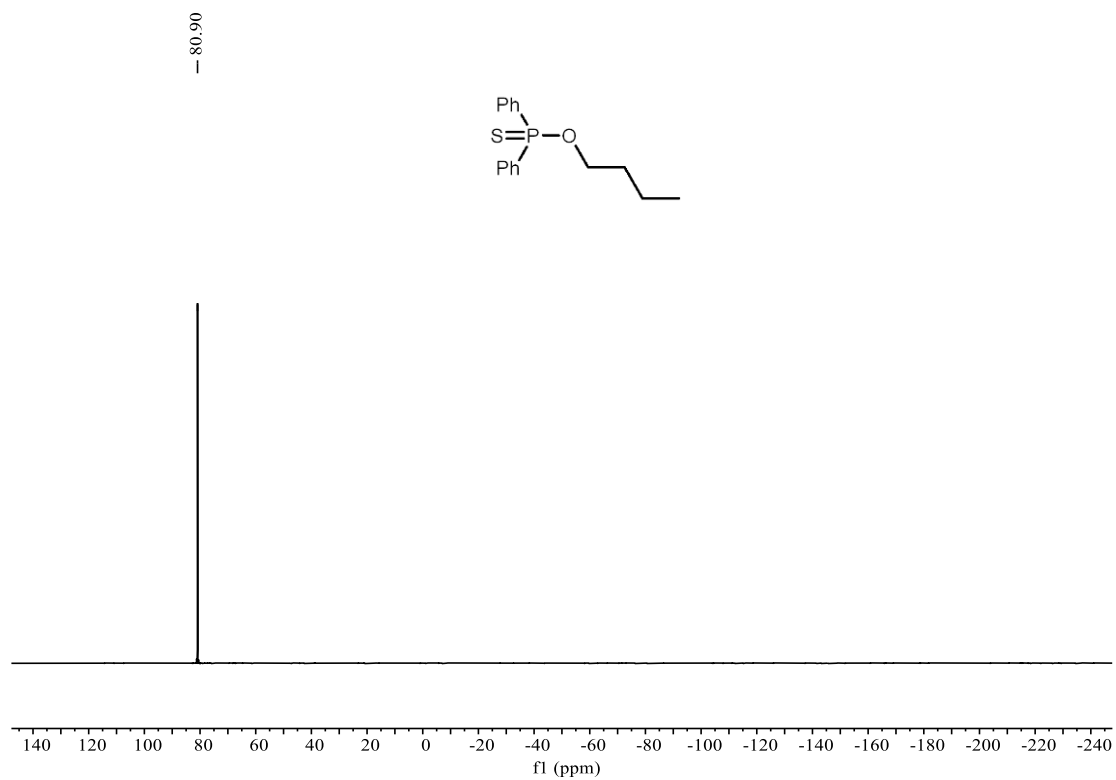

O-(3,3-dimethylbutyl) diphenylphosphinothioate (**3a1'**)

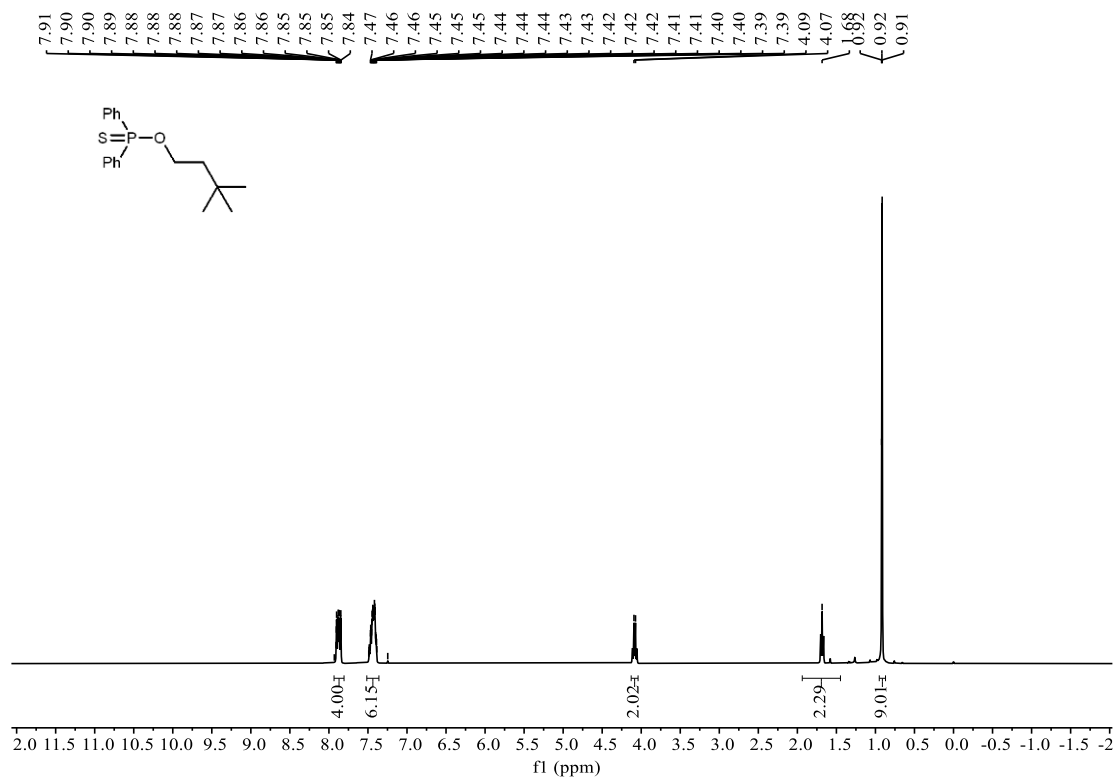

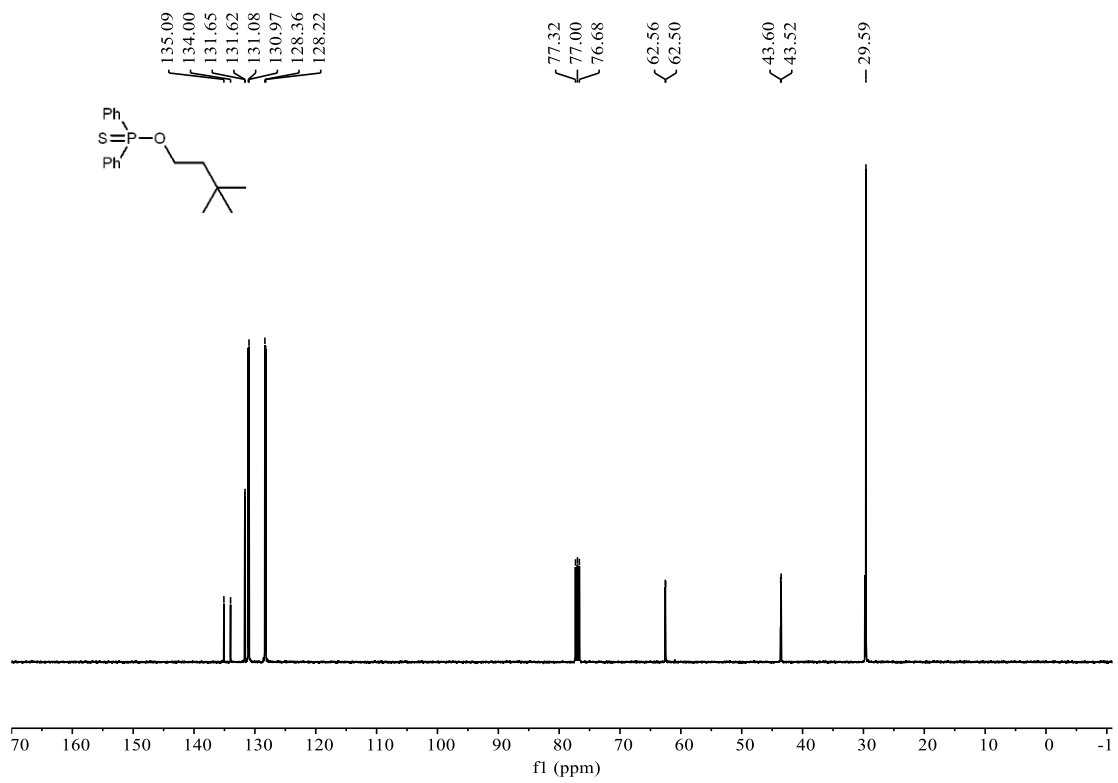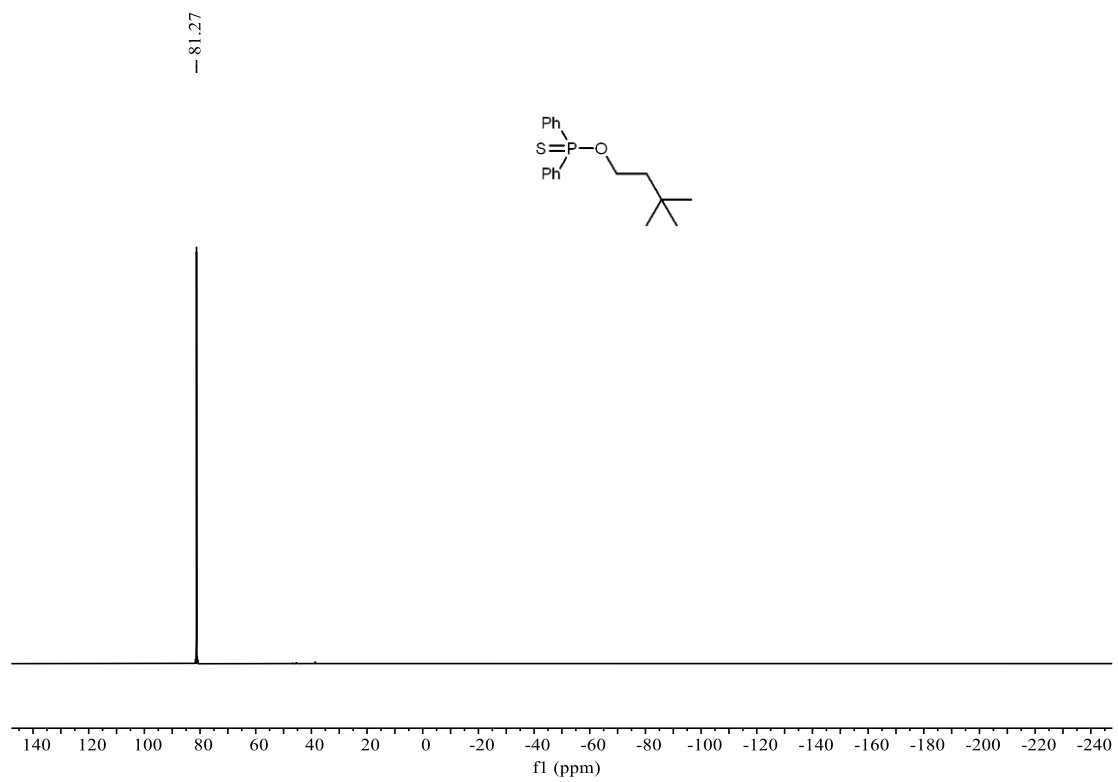

O-(cyclohexylmethyl) diphenylphosphinothioate (**3am'**)

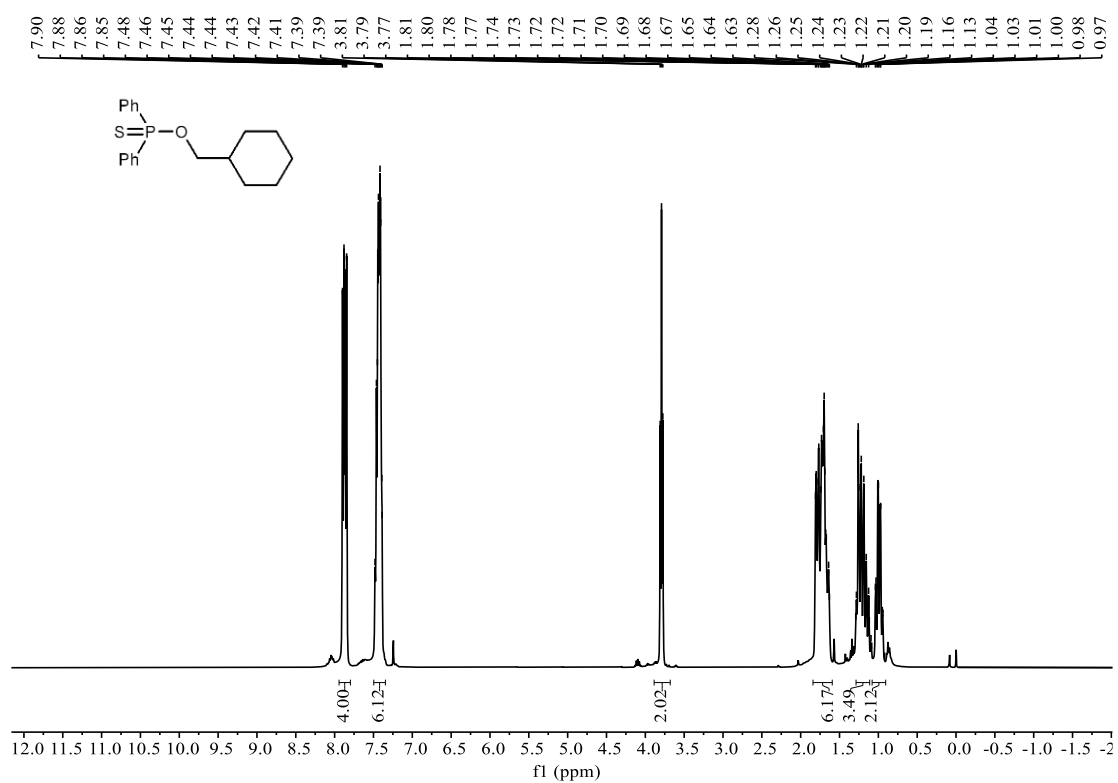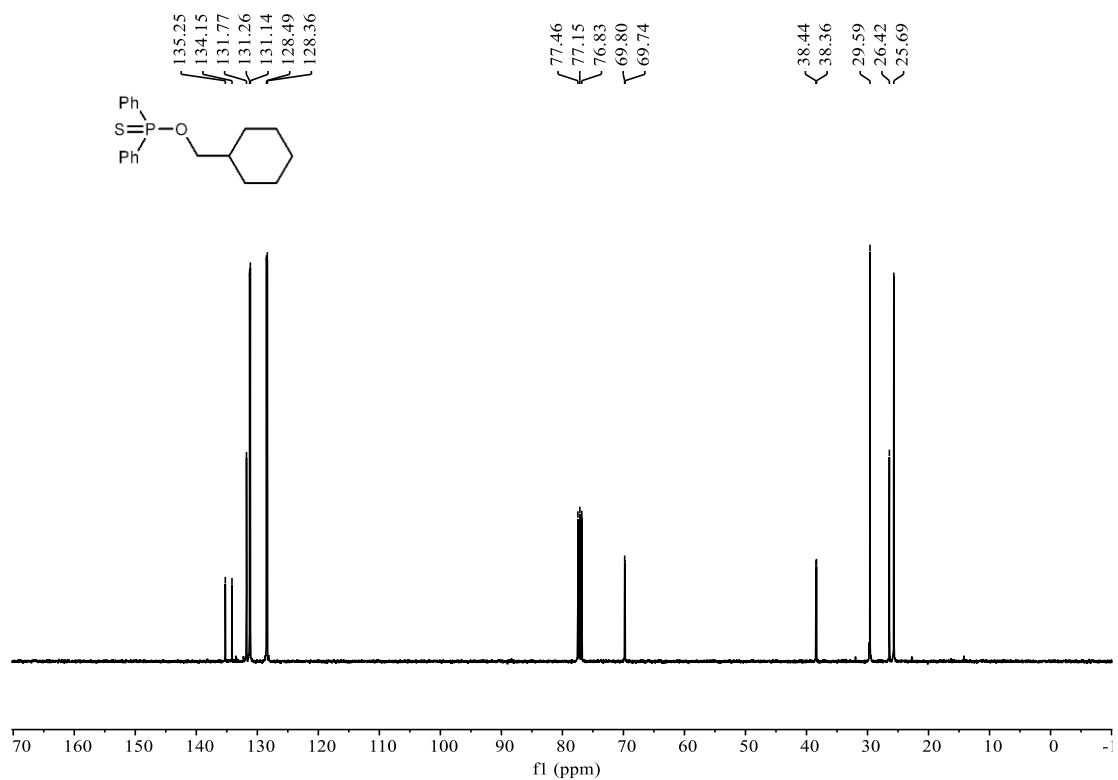

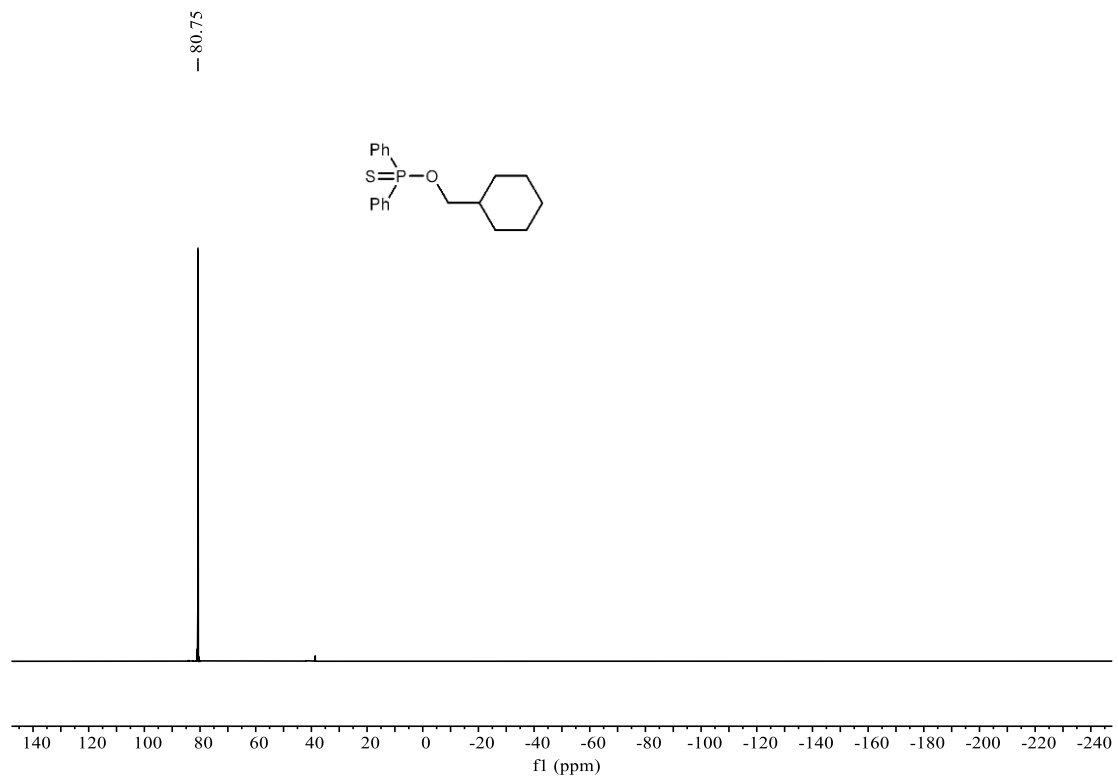

diphenyl(4,4,4-trifluorobutoxy)phosphane (**3an'**)

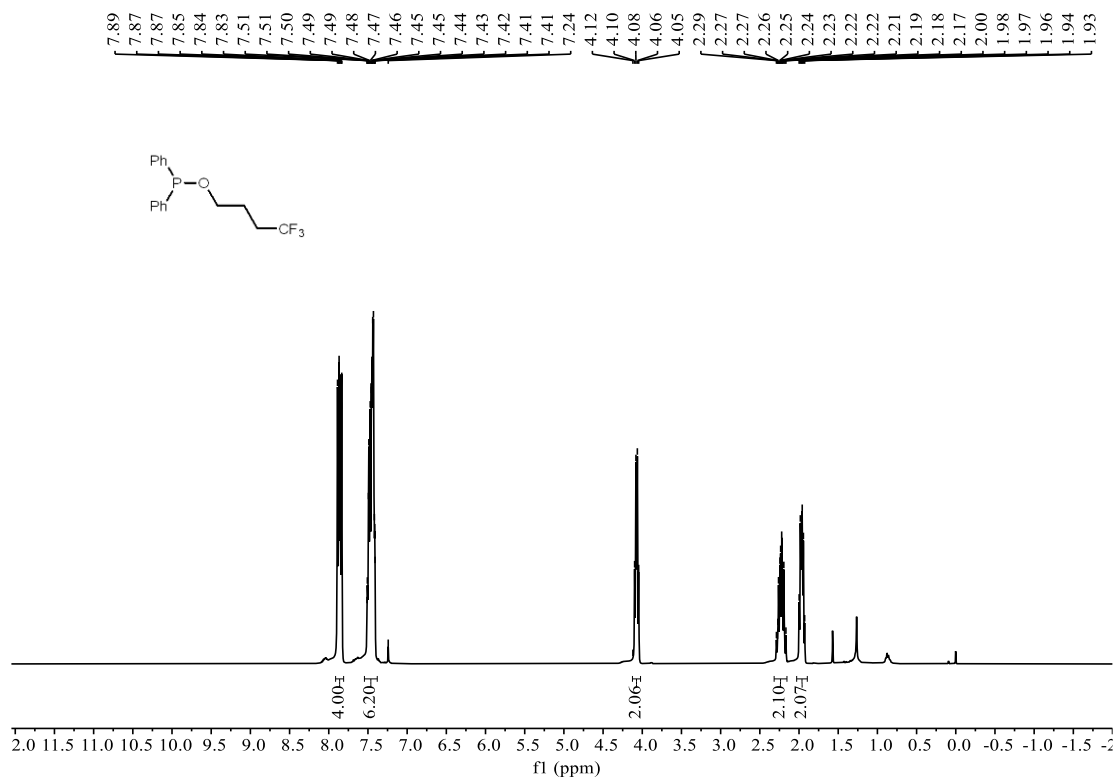

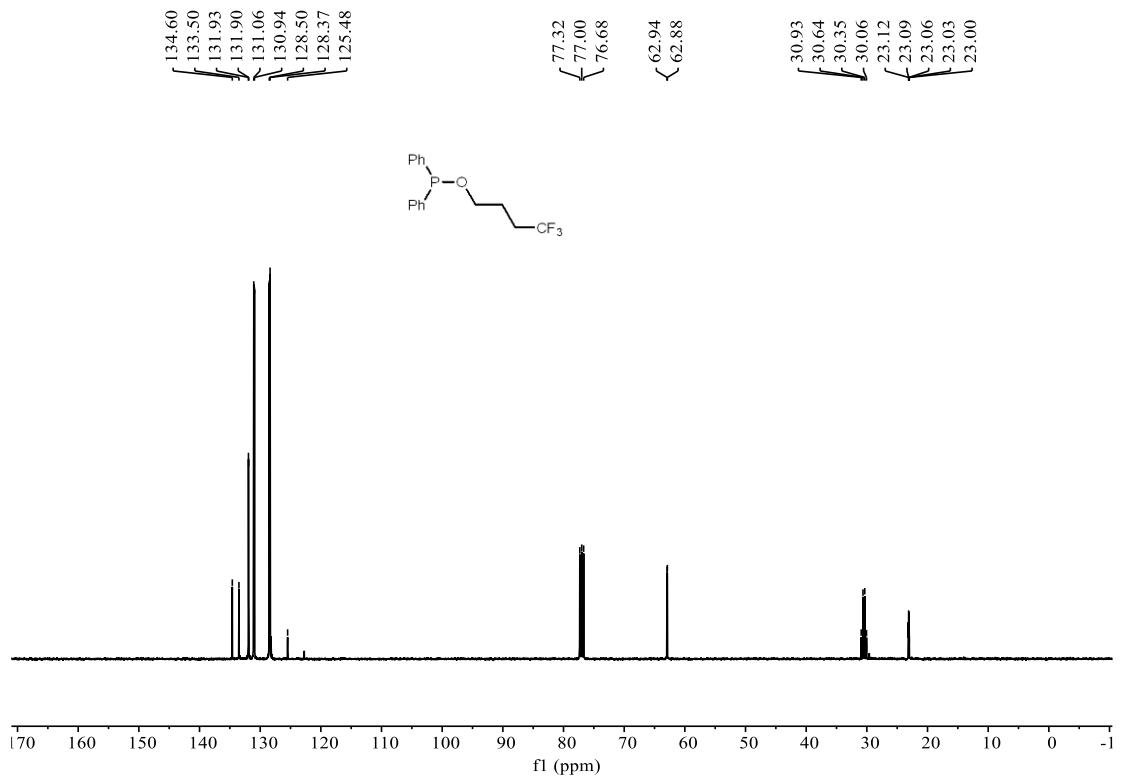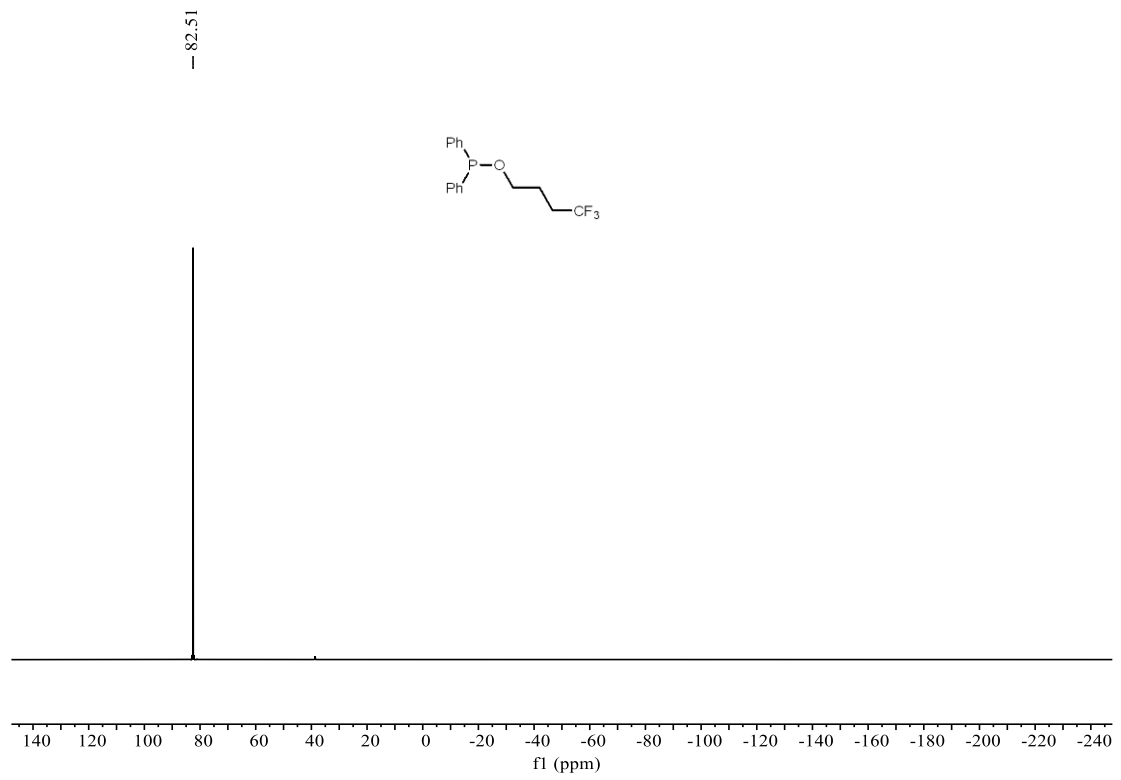

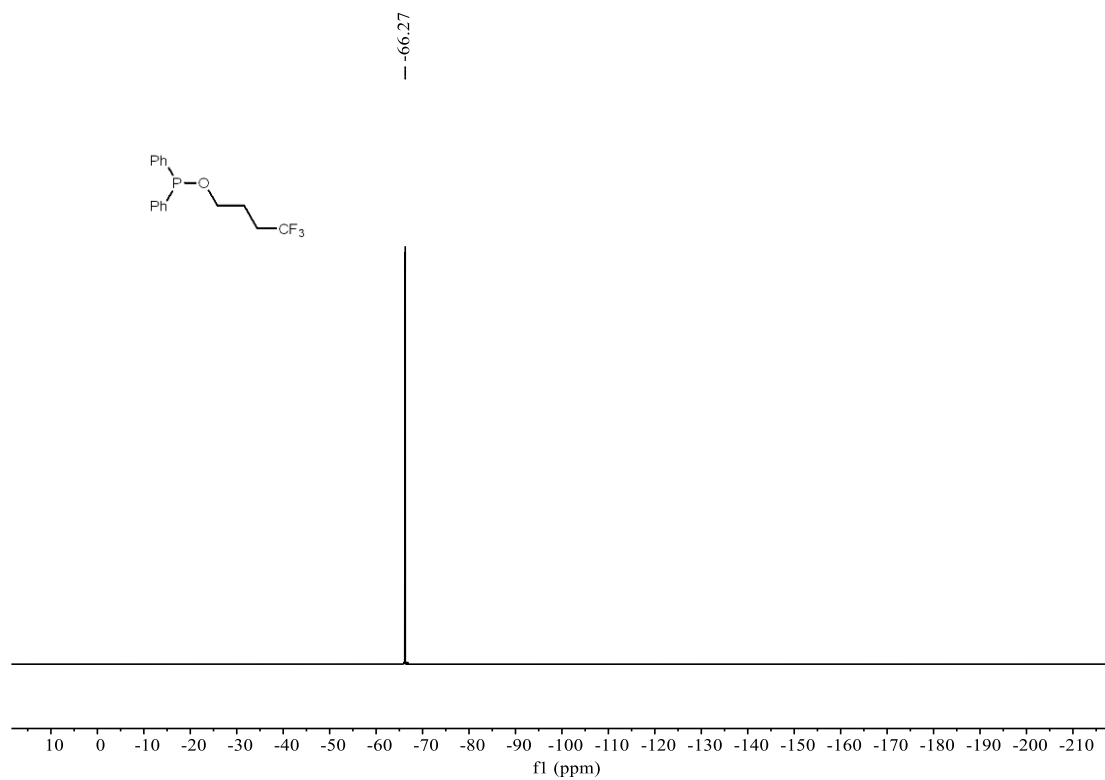

**O-(2-phenoxyethyl) diphenylphosphinothioate (3a0')**

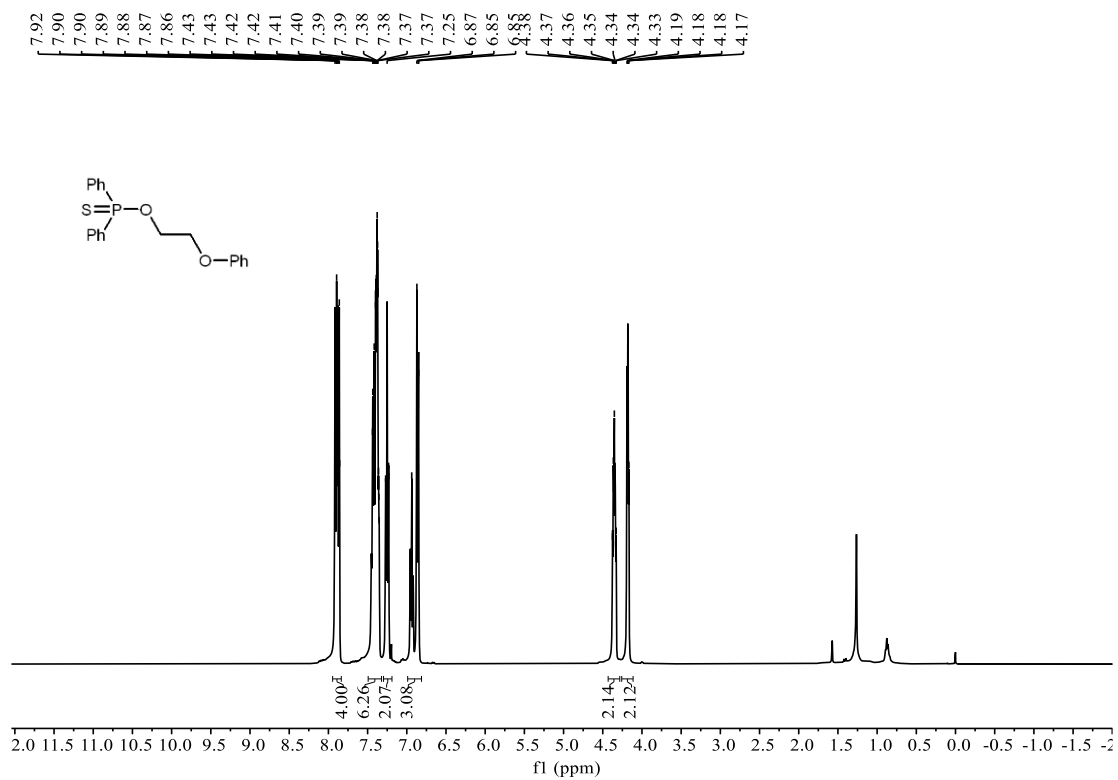

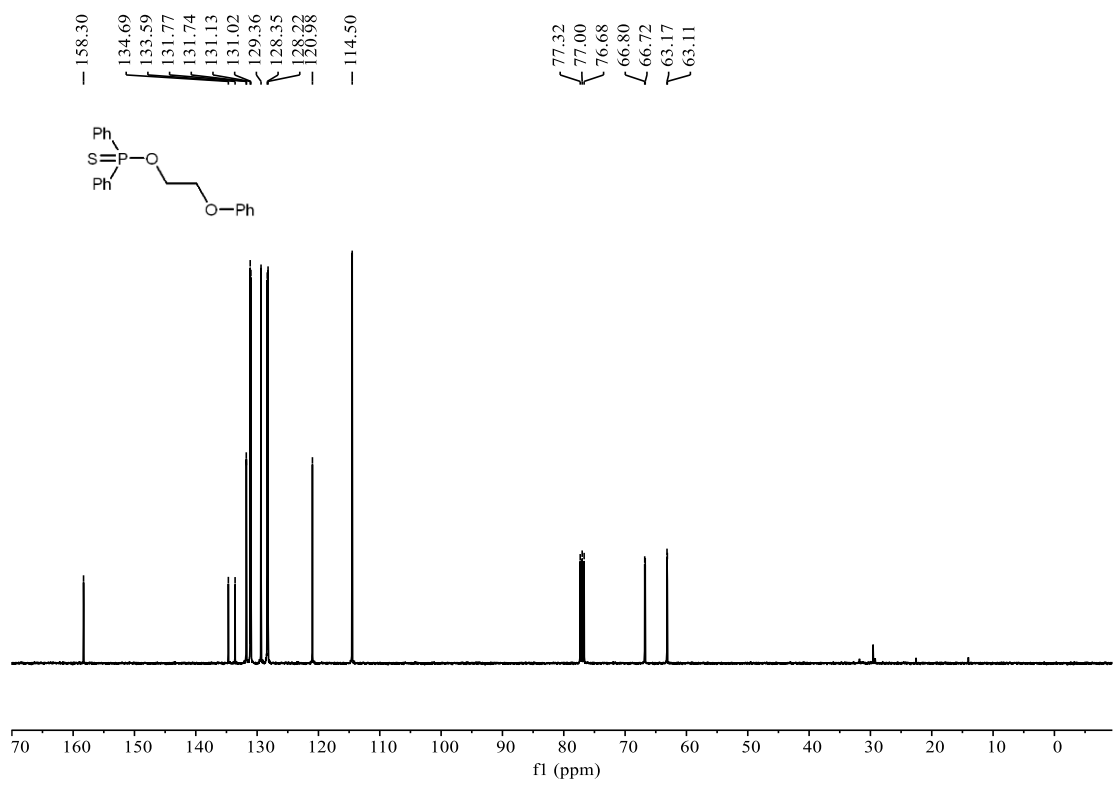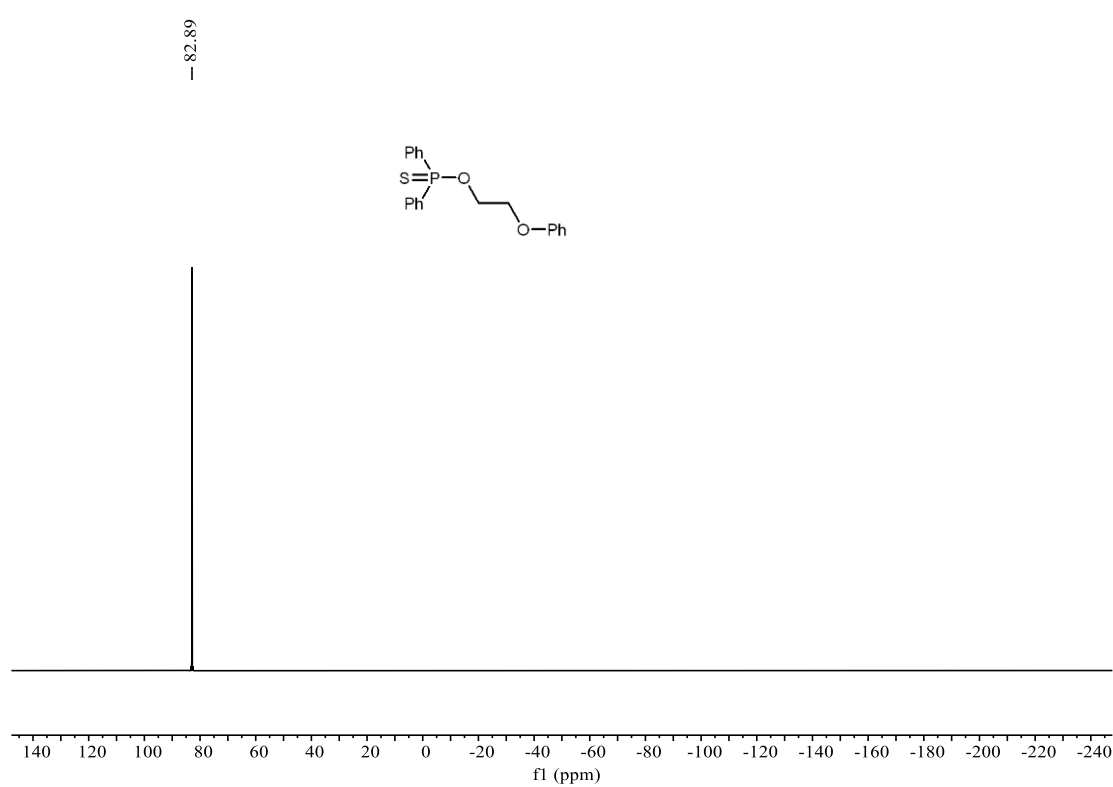

O-((tetrahydrofuran-2-yl)methyl) diphenylphosphinothioate (**3ap'**)

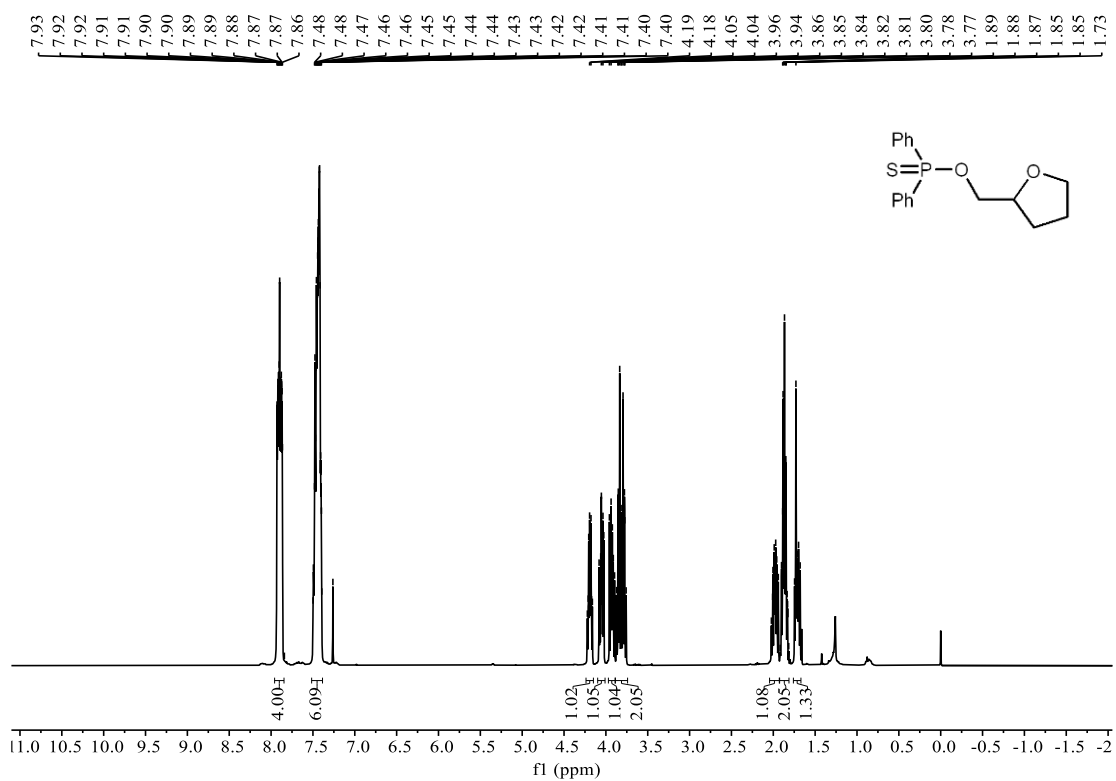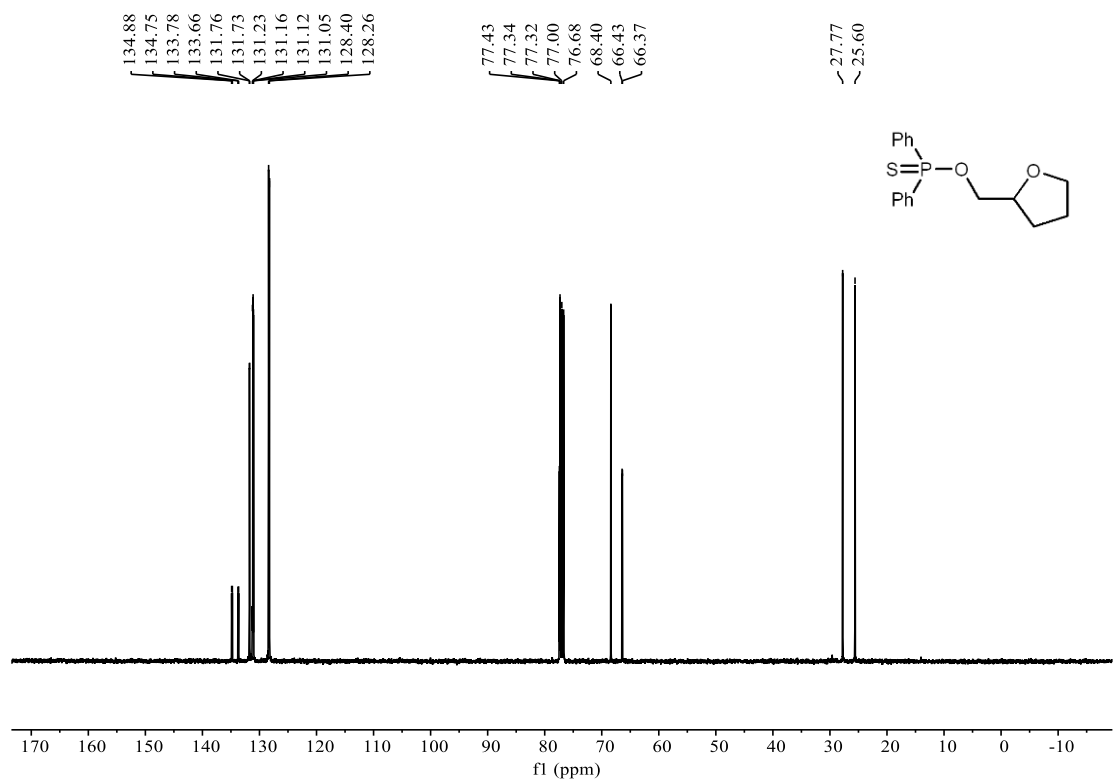

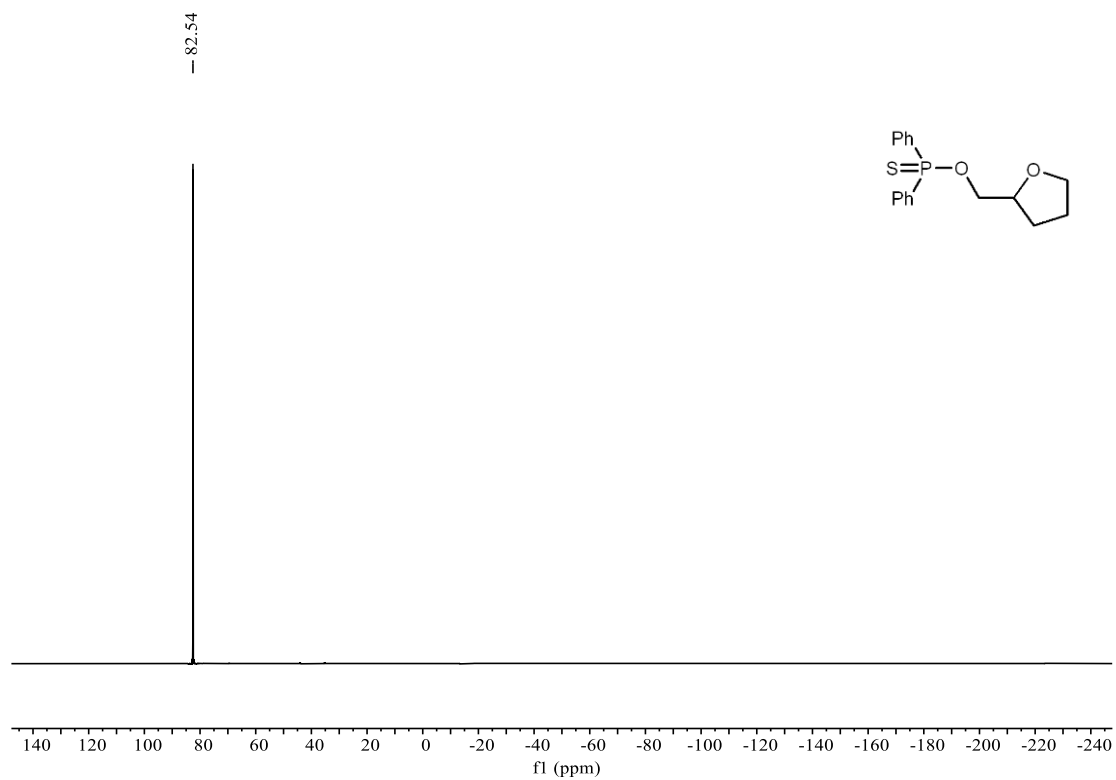

O-(bicyclo[2.2.1]hept-5-en-2-ylmethyl) diphenylphosphinothioate (**3a'**)

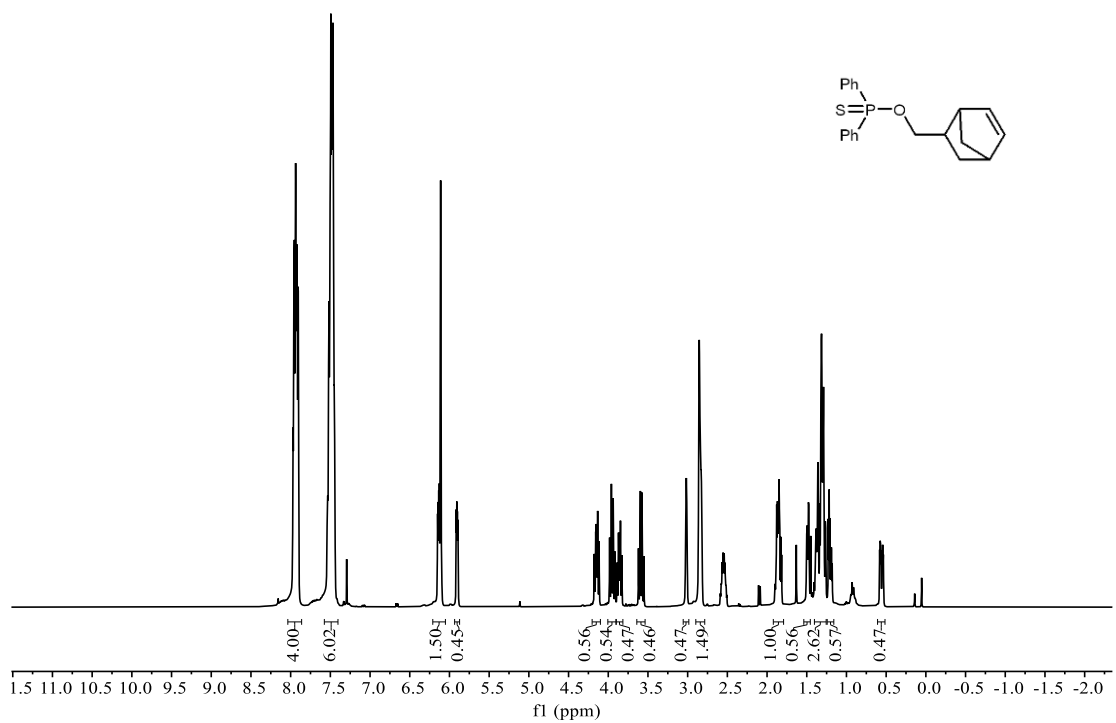

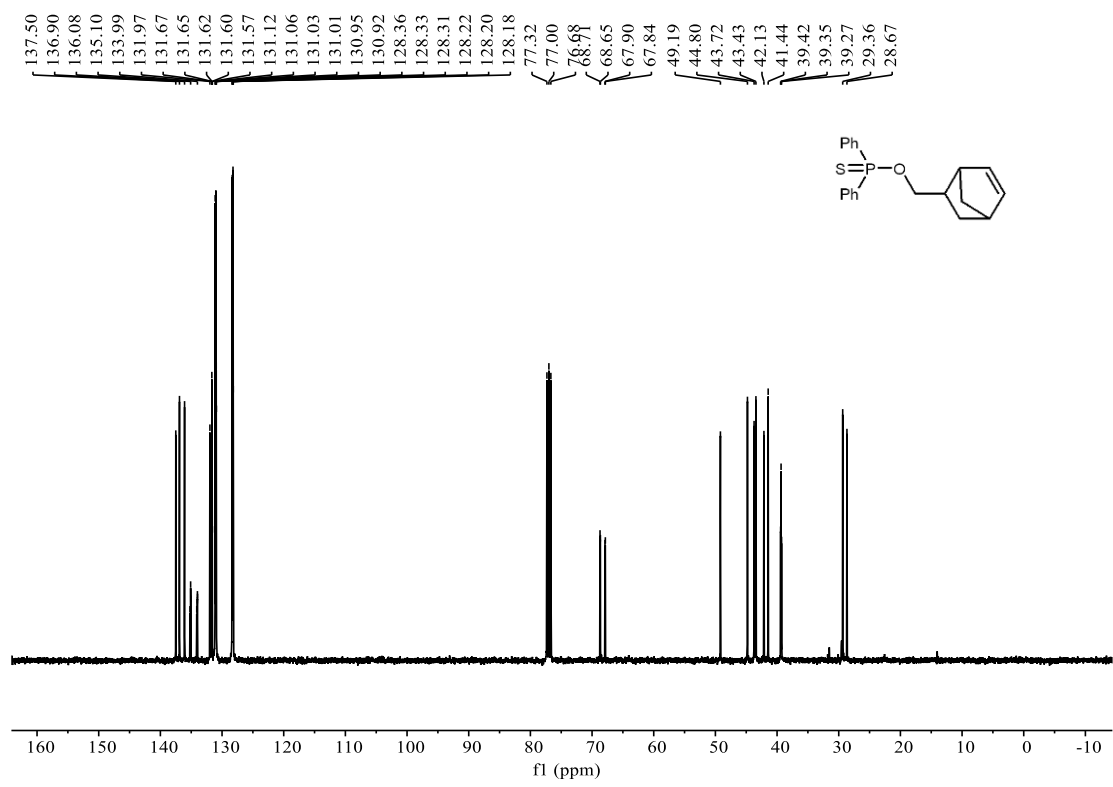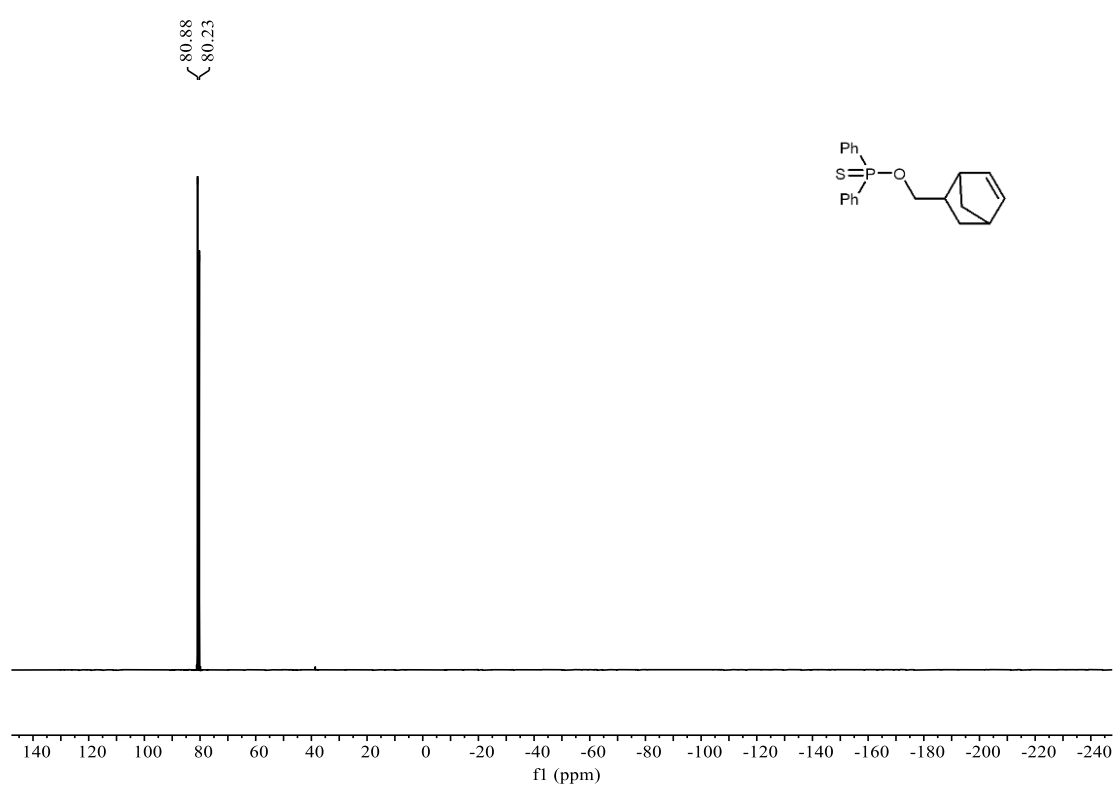

O-(hex-5-en-1-yl) diphenylphosphinothioate (**3ar'**)

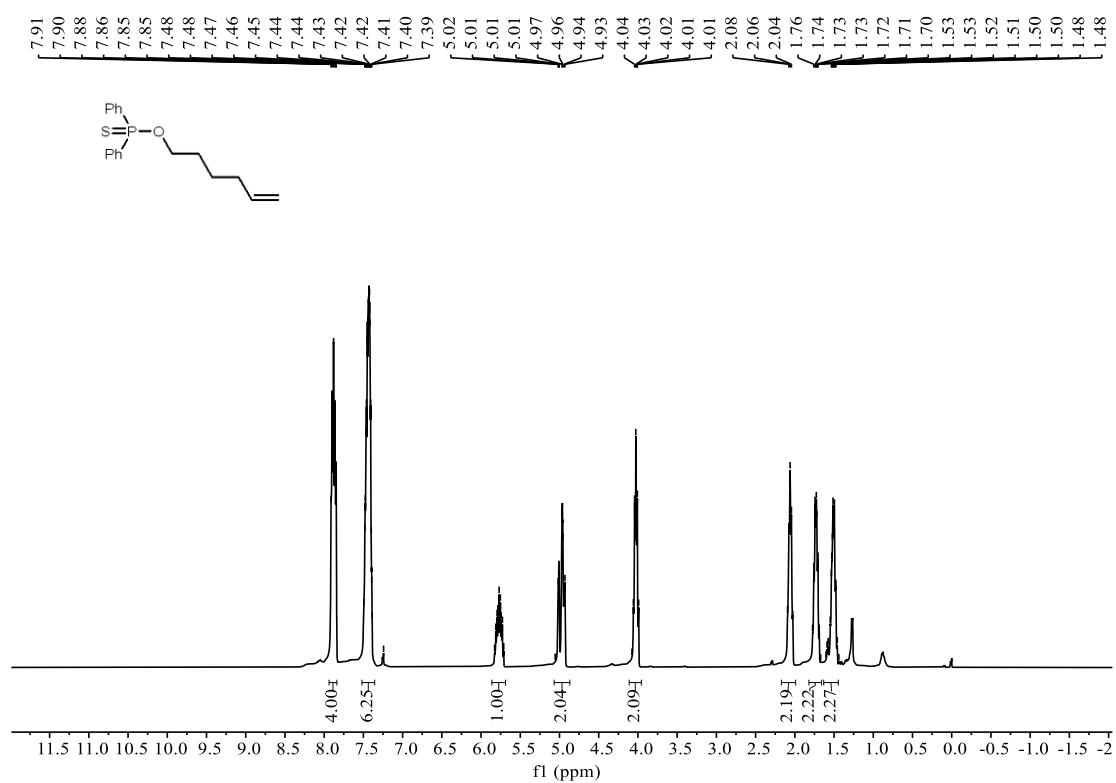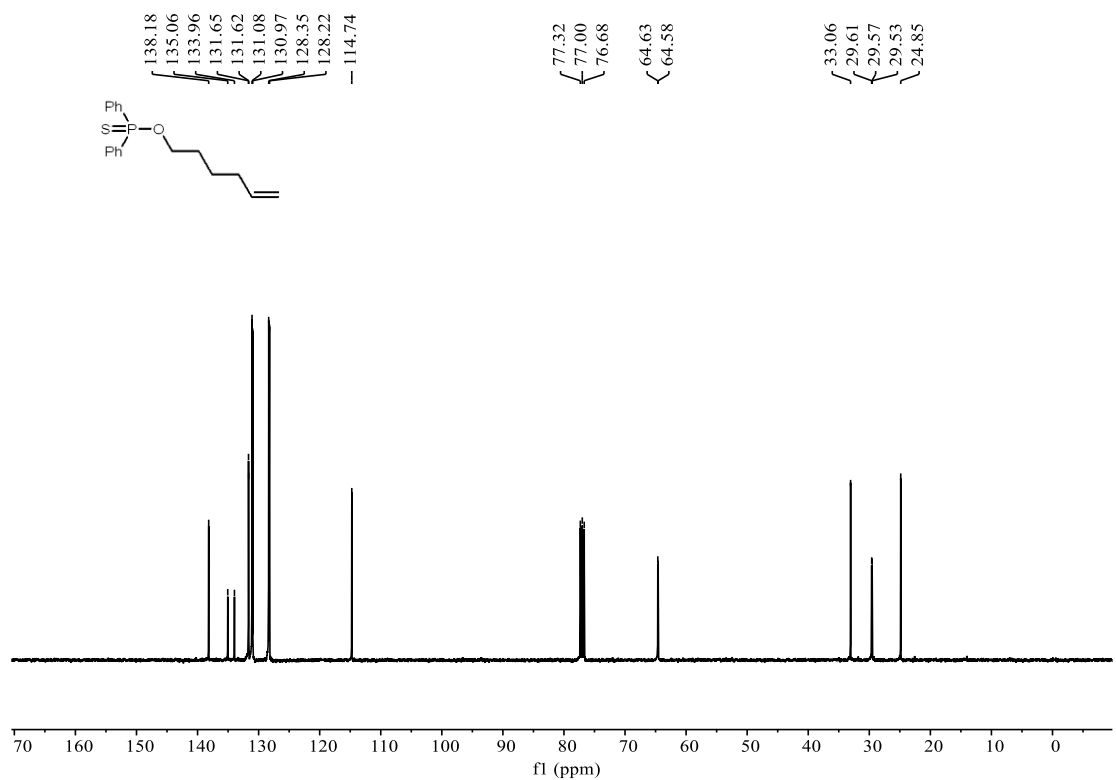

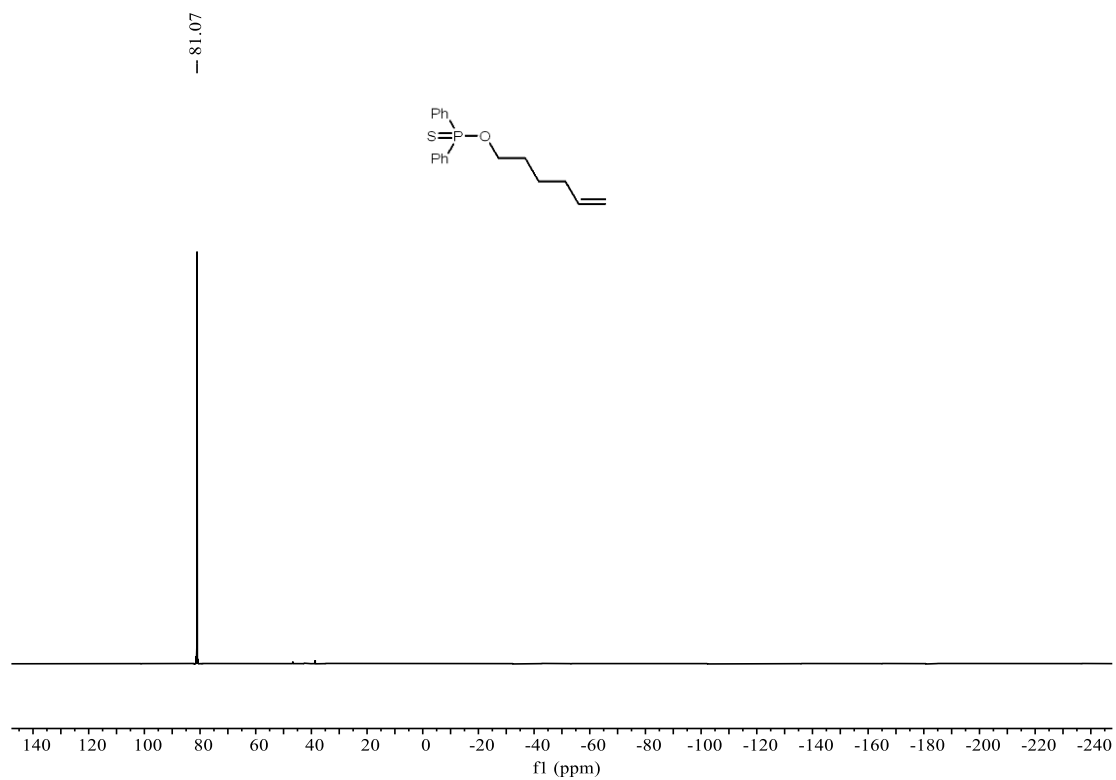

O-(pent-4-yn-1-yl) diphenylphosphinothioate (**3as'**)

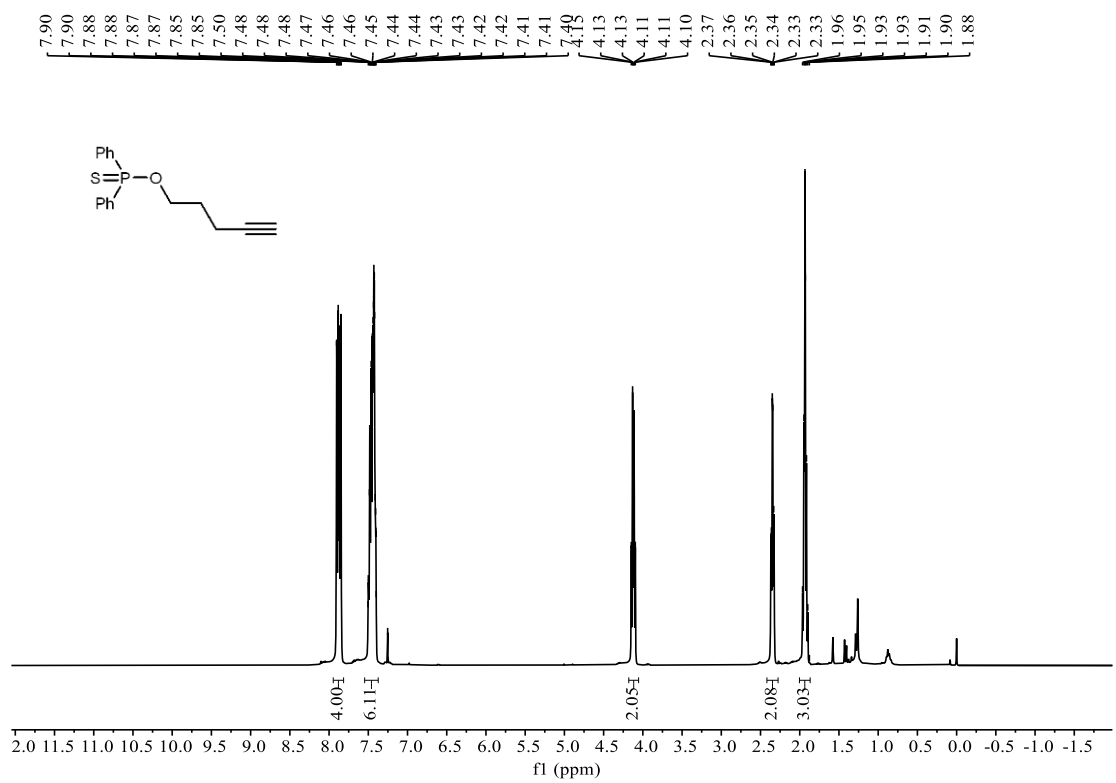

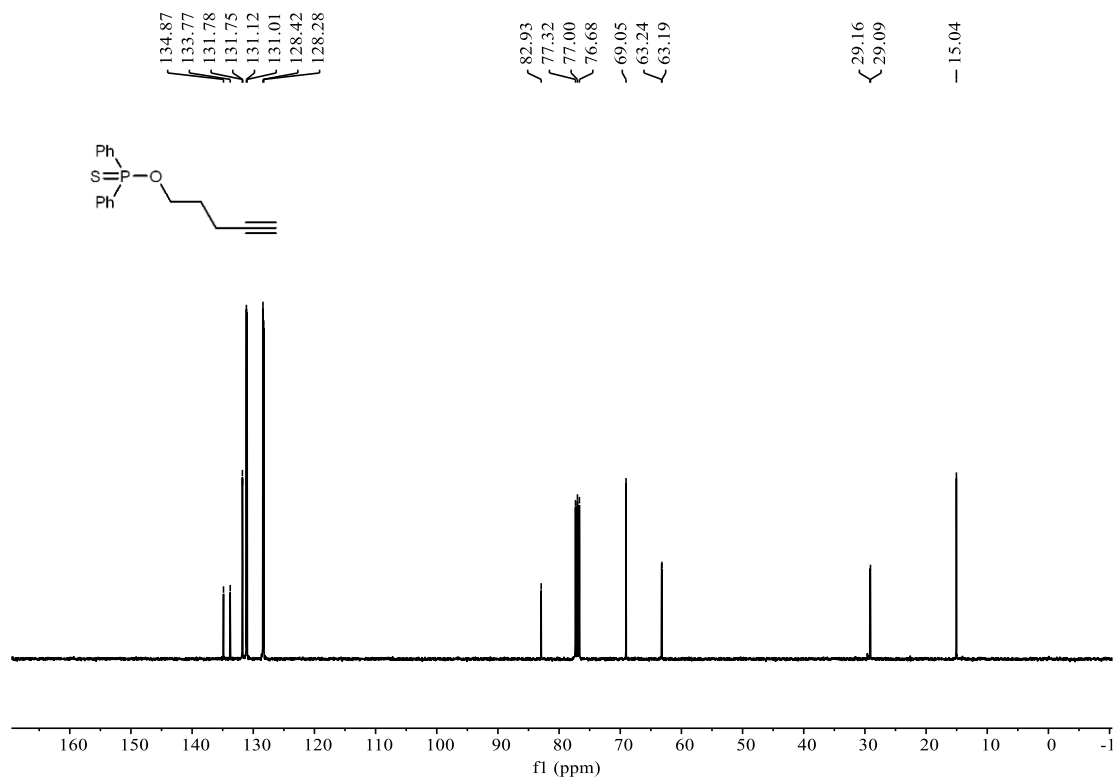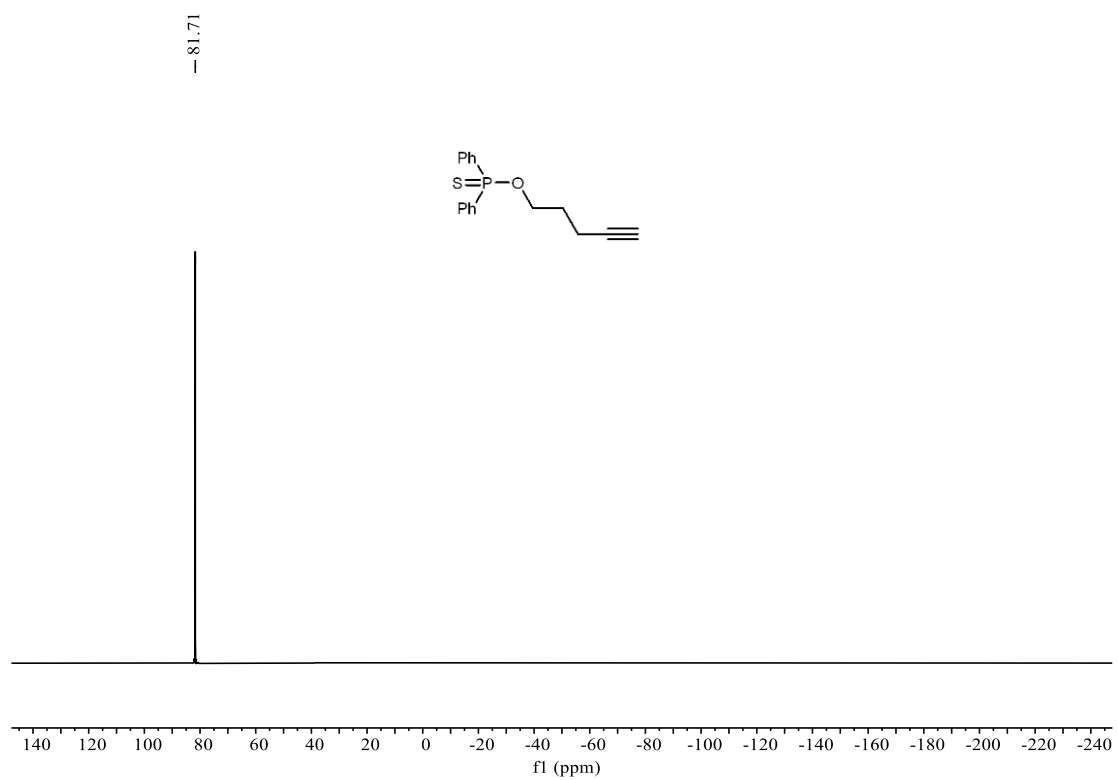

# O-phenethyl diphenylphosphinothioate (**3at'**)

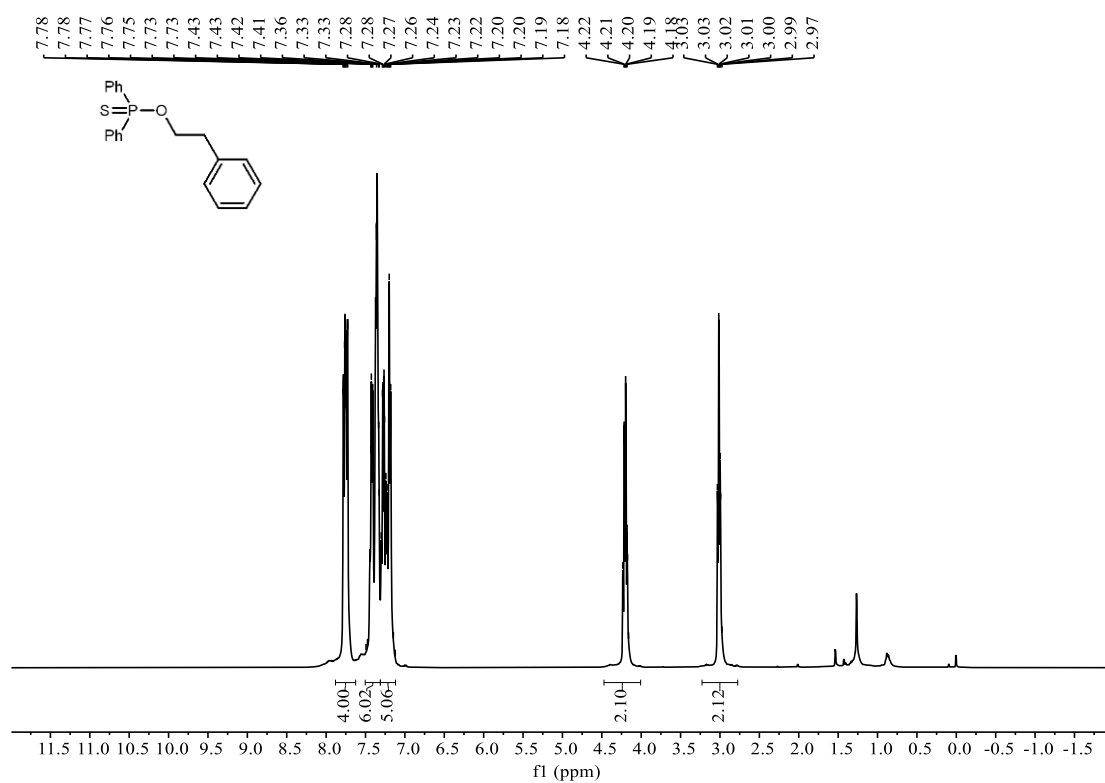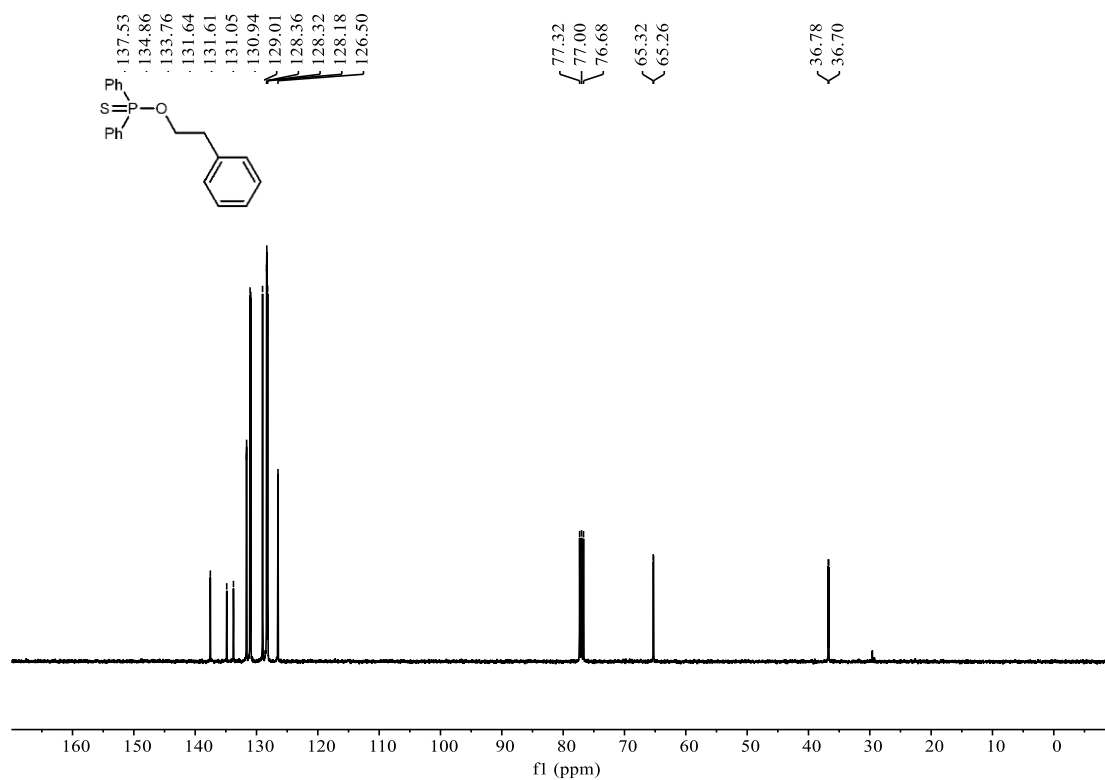

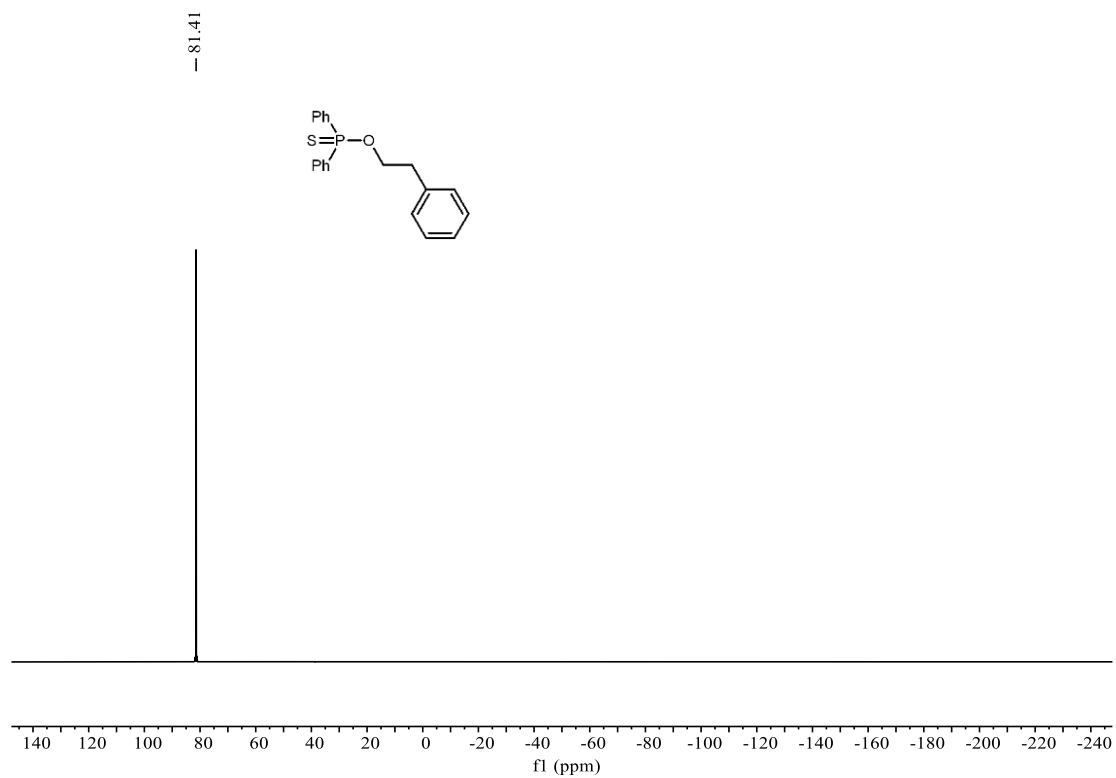

**O-isopropyl diphenylphosphinothioate (3au')**

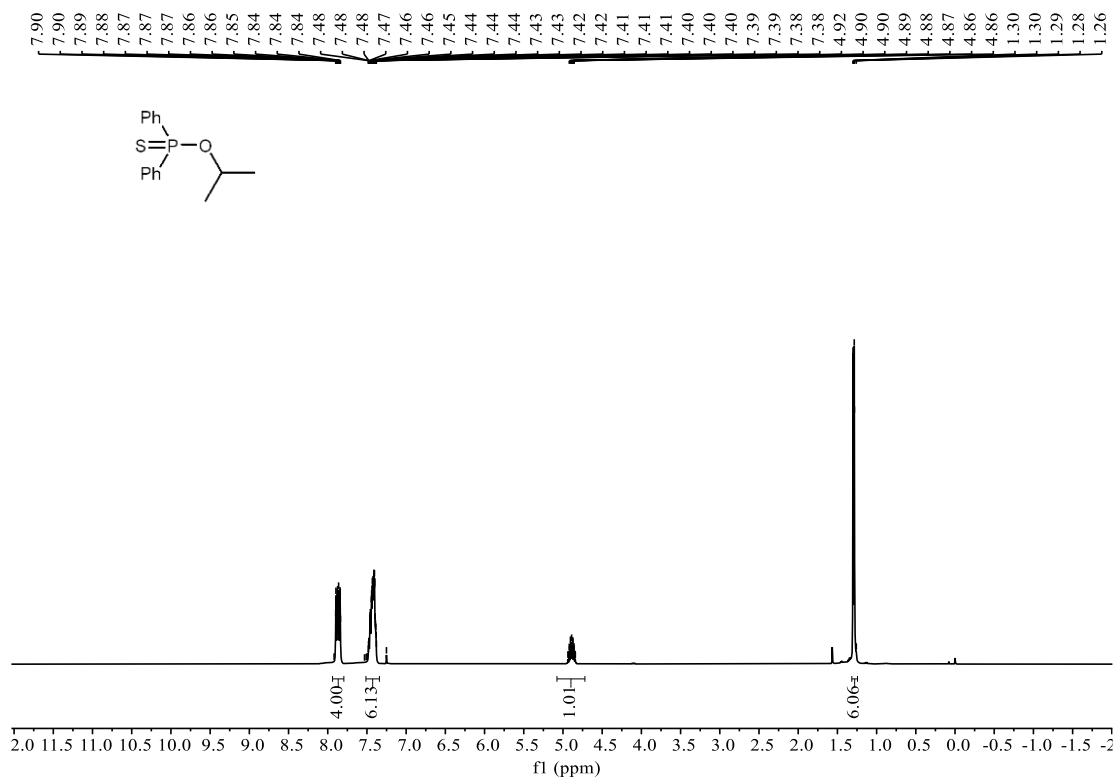

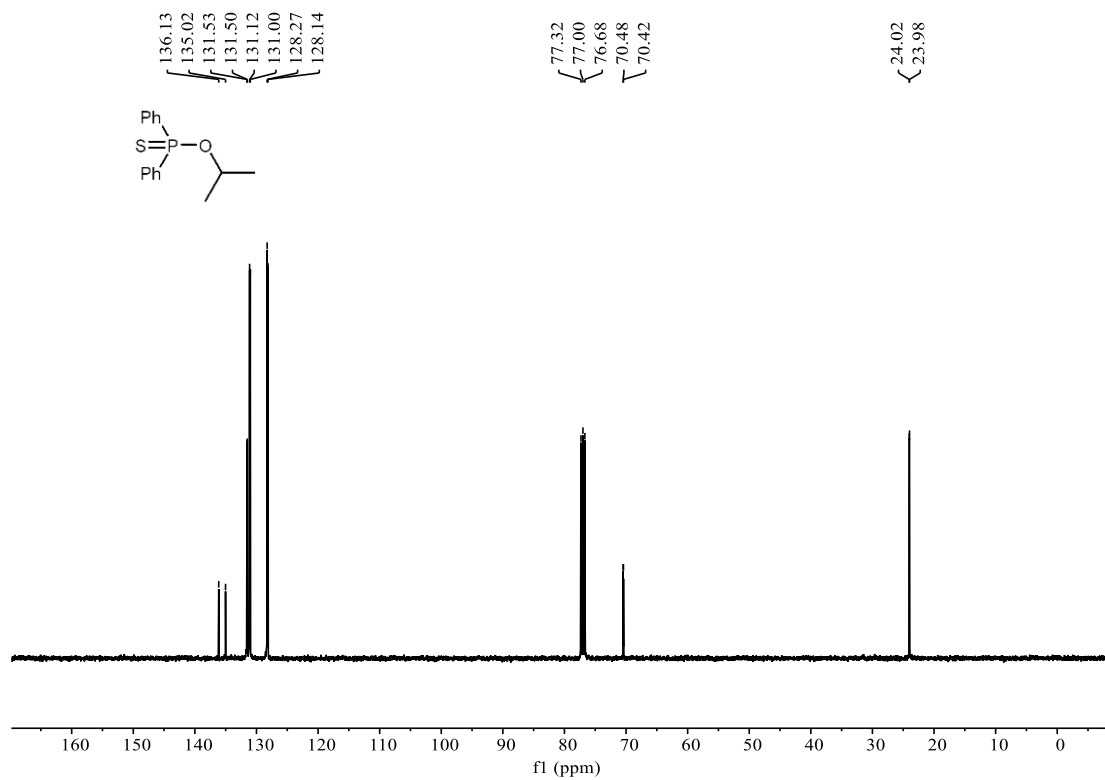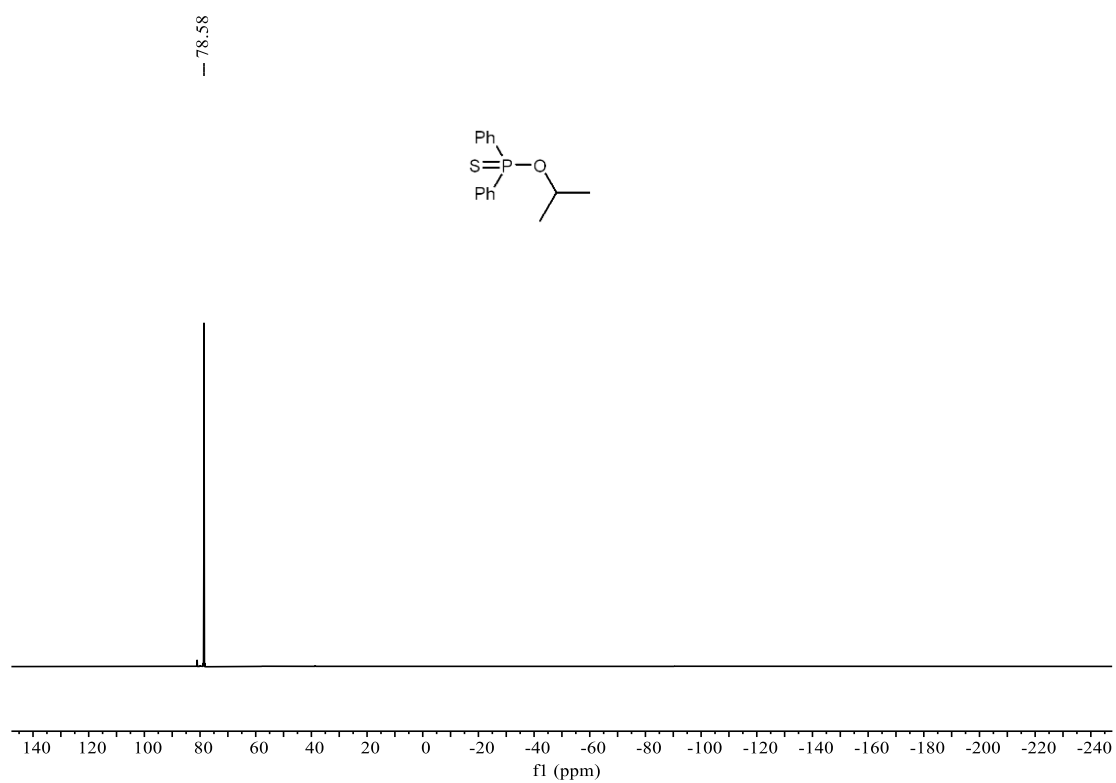

# O-cyclohexyl diphenylphosphinothioate (**3av'**)

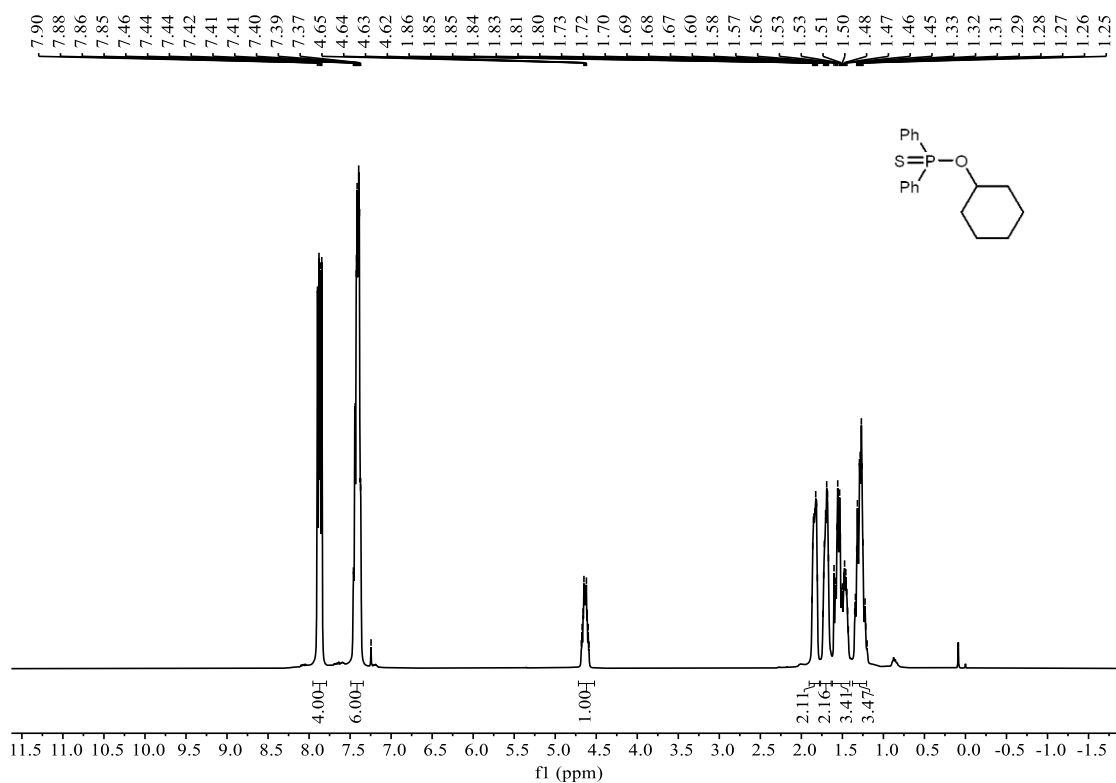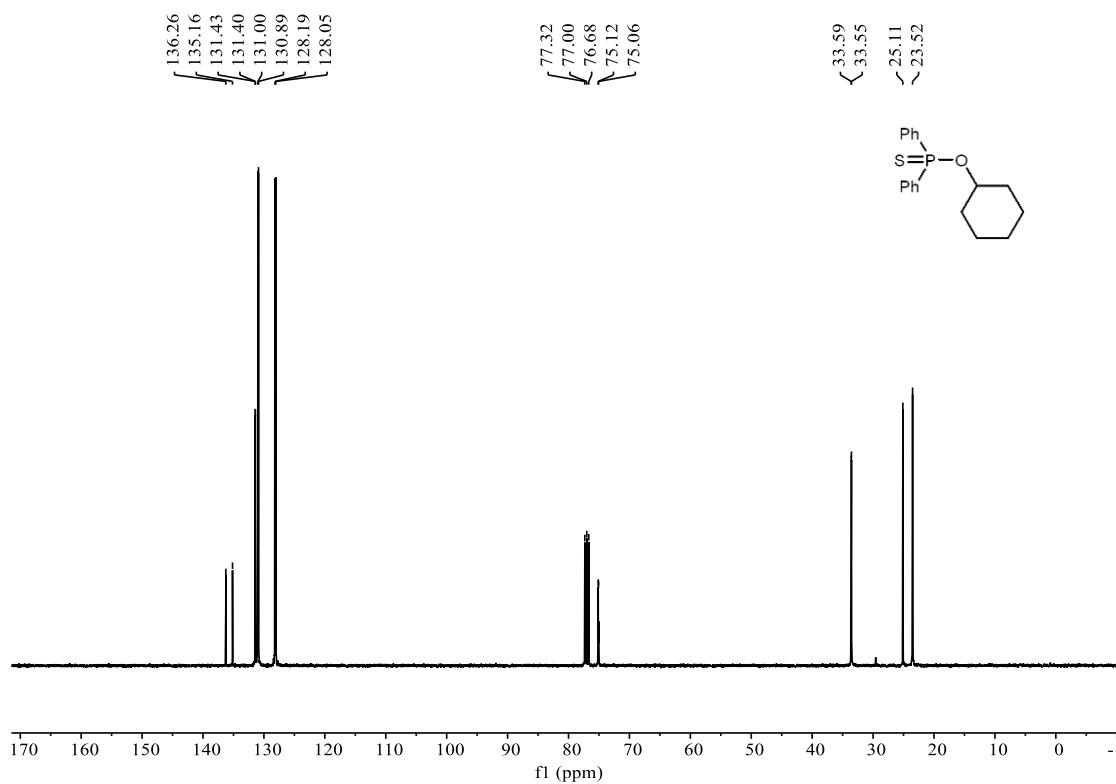

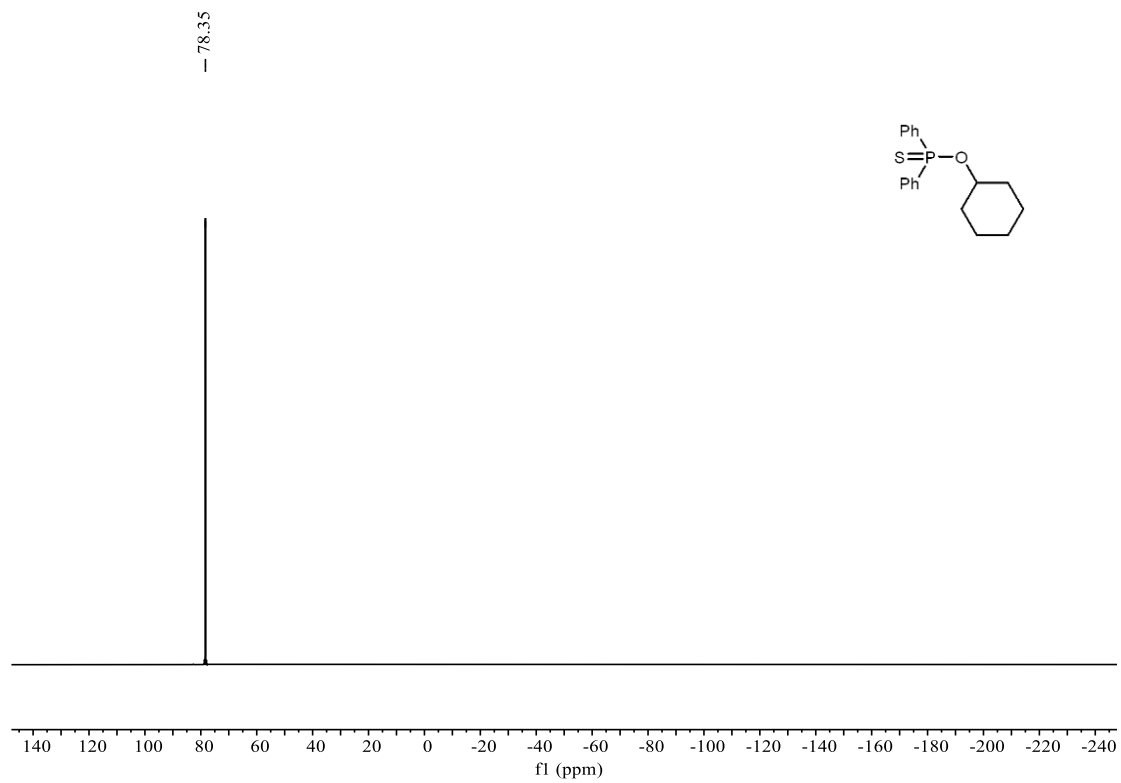

**4-chlorophenyl diphenylphosphinodithioate (4a')**

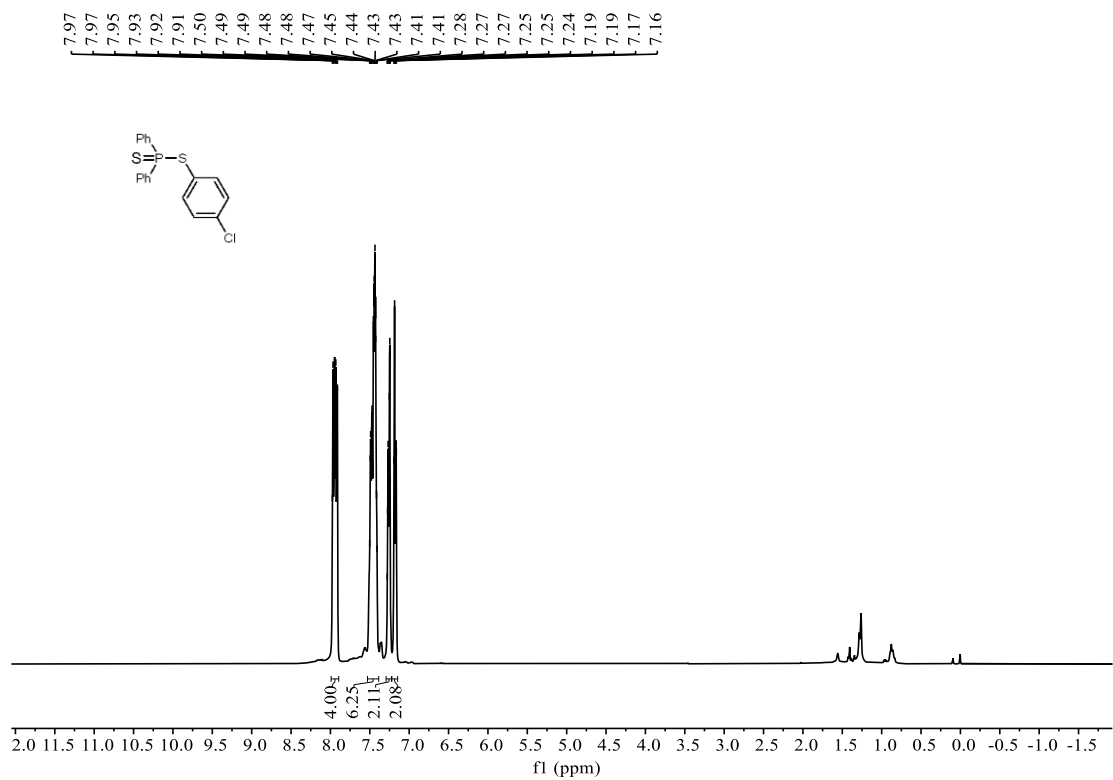

7.97  
7.97  
7.95  
7.93  
7.92  
7.91  
7.50  
7.49  
7.49  
7.48  
7.48  
7.47  
7.45  
7.44  
7.43  
7.43  
7.41  
7.41  
7.28  
7.27  
7.27  
7.25  
7.25  
7.24  
7.19  
7.19  
7.17  
7.16

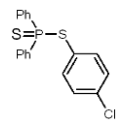

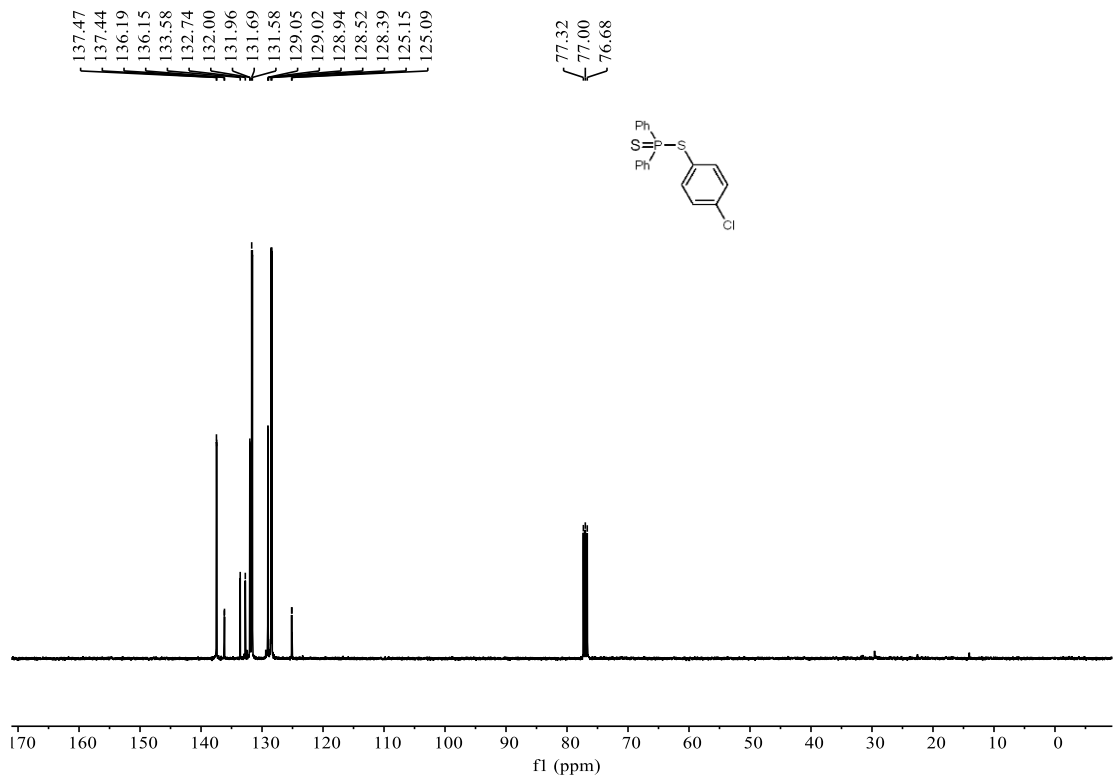

66.00

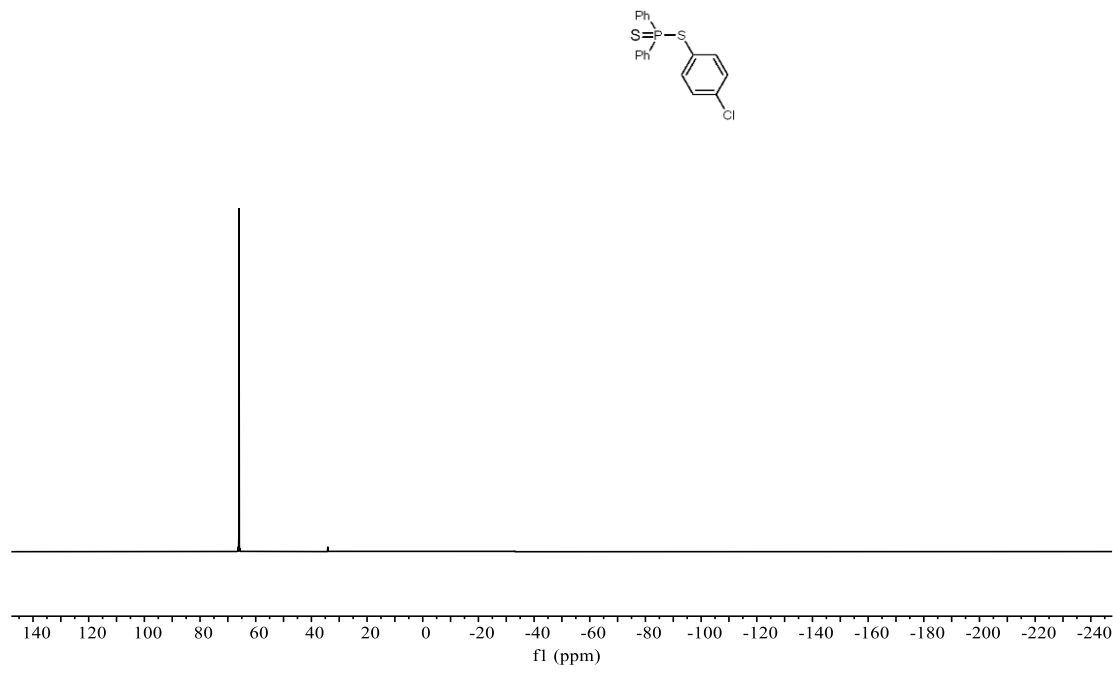

((4-Fluorophenyl)thio)diphenylphosphane (**4b'**)

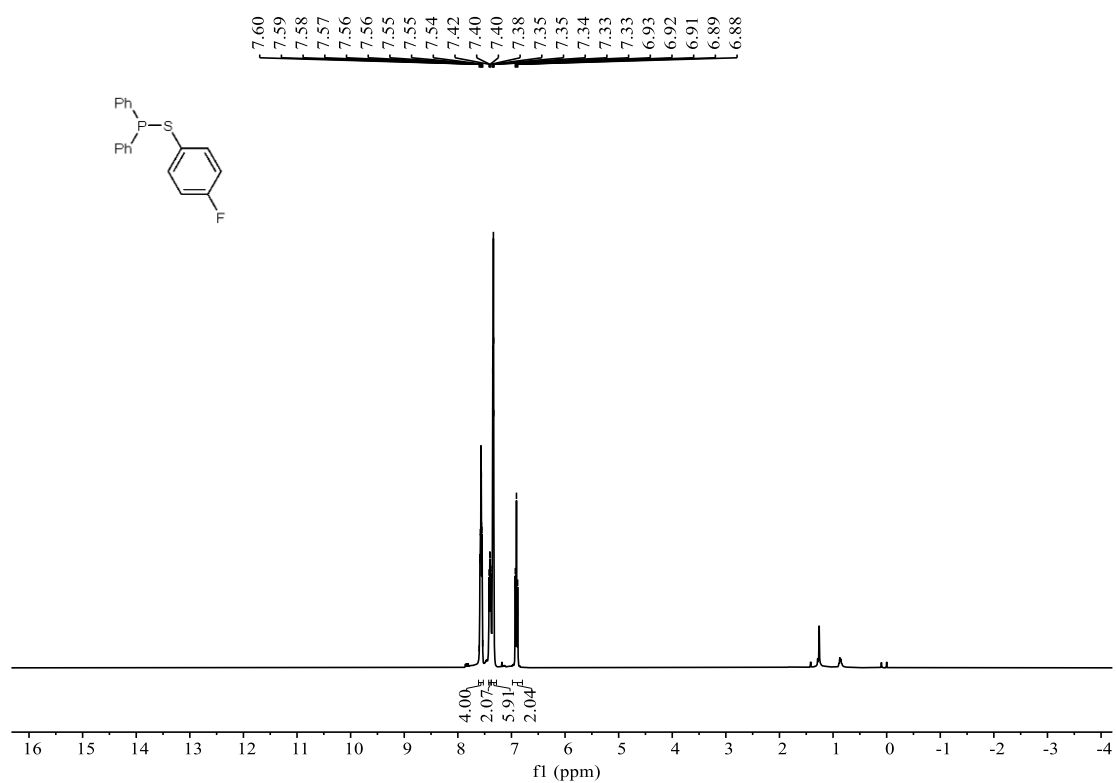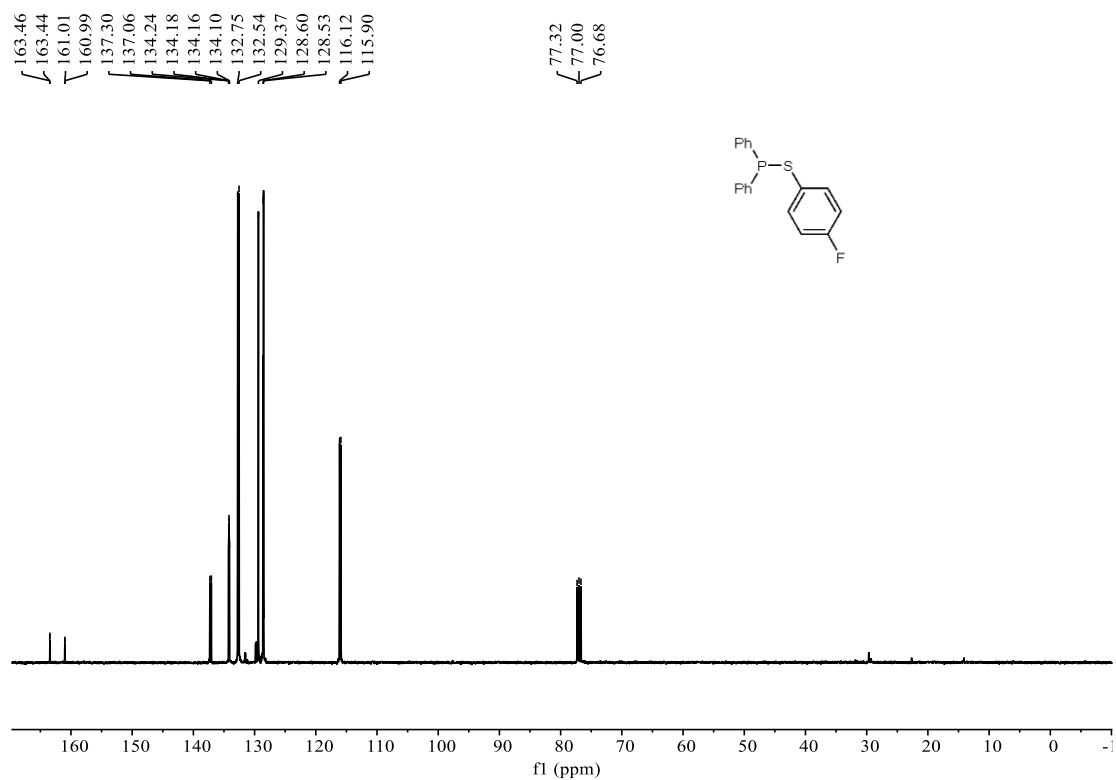

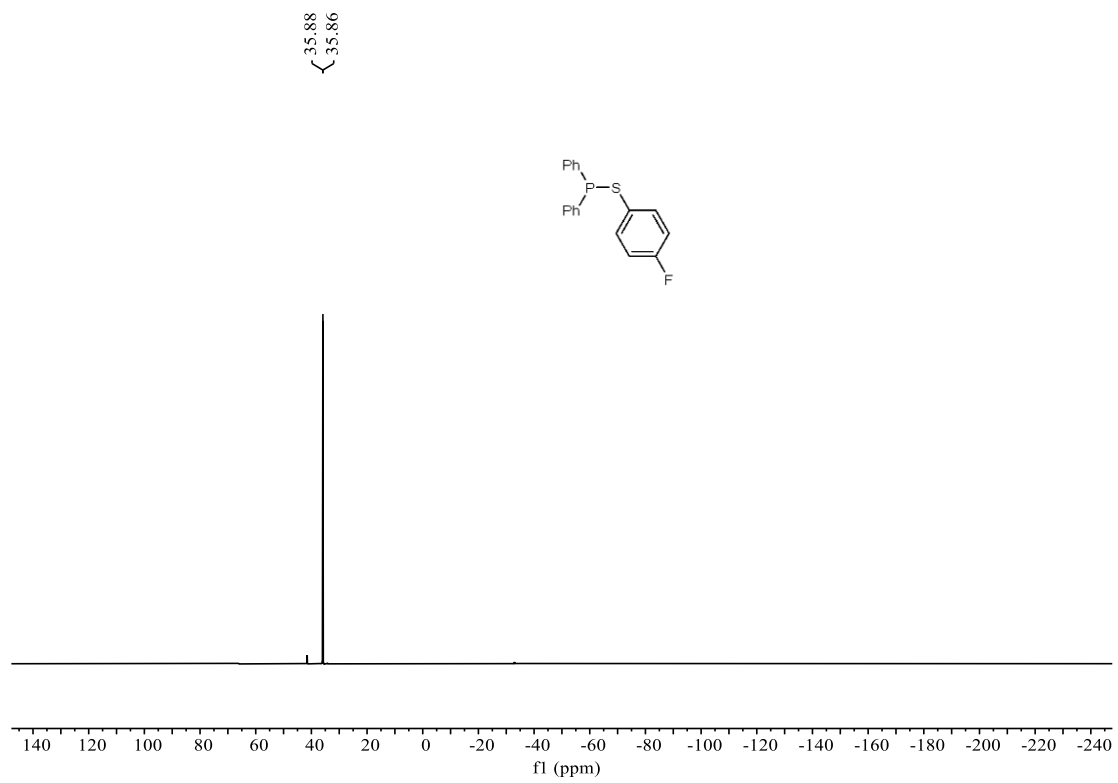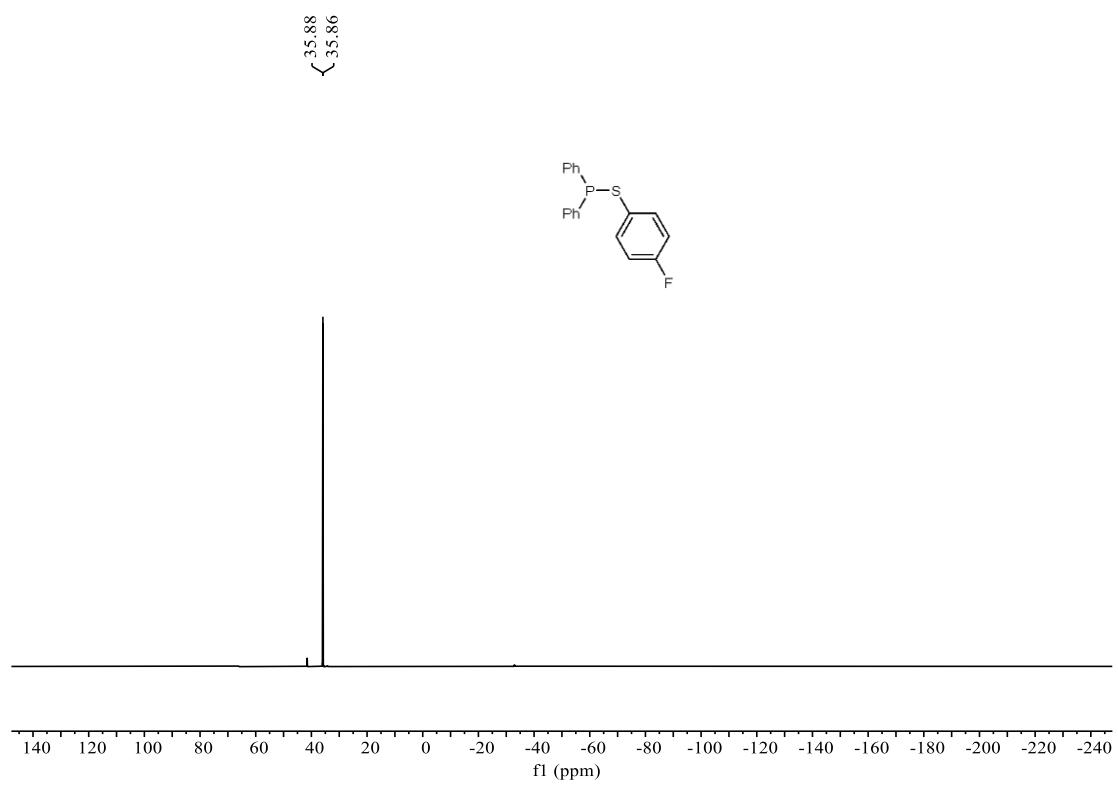

# 4-Bromophenyl diphenylphosphinodithioate (4c')

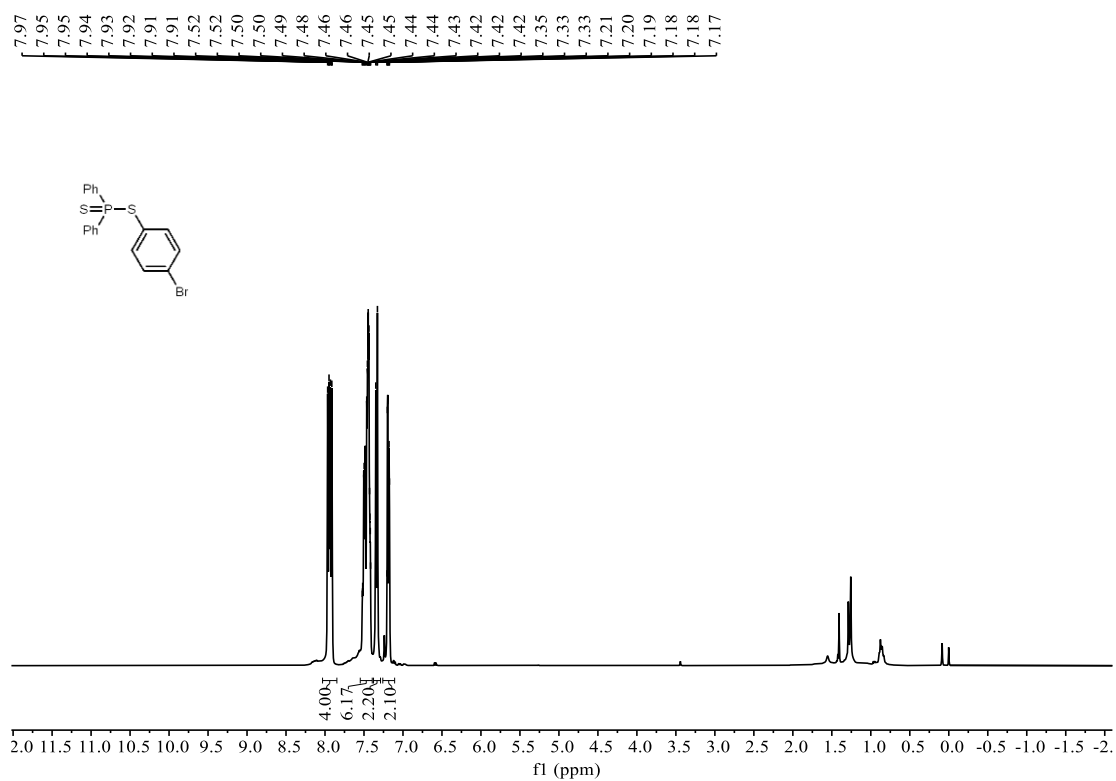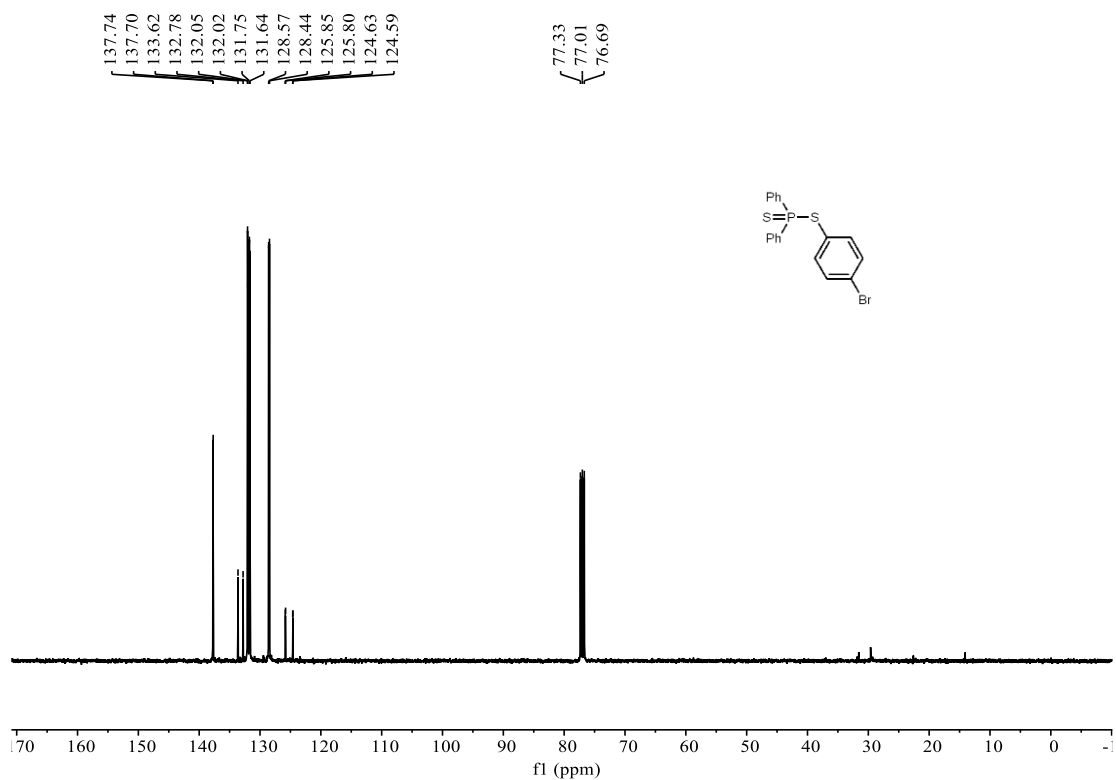

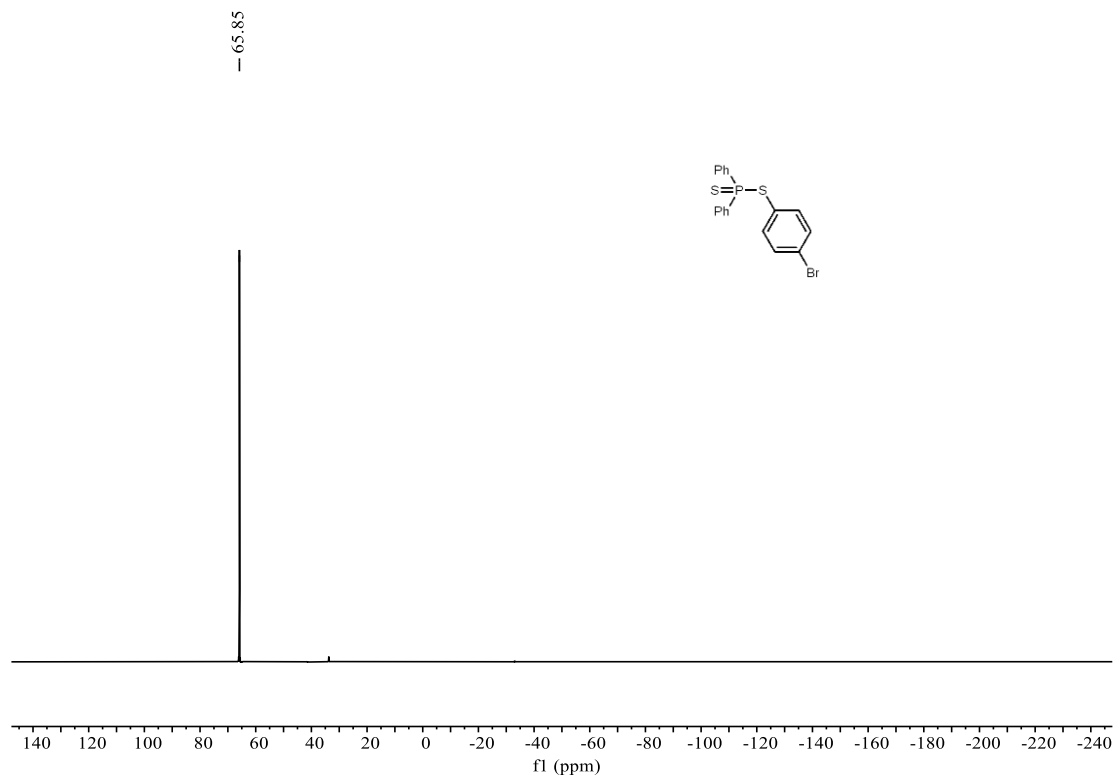

**Diphenyl(p-tolylthio)phosphane (4d)**

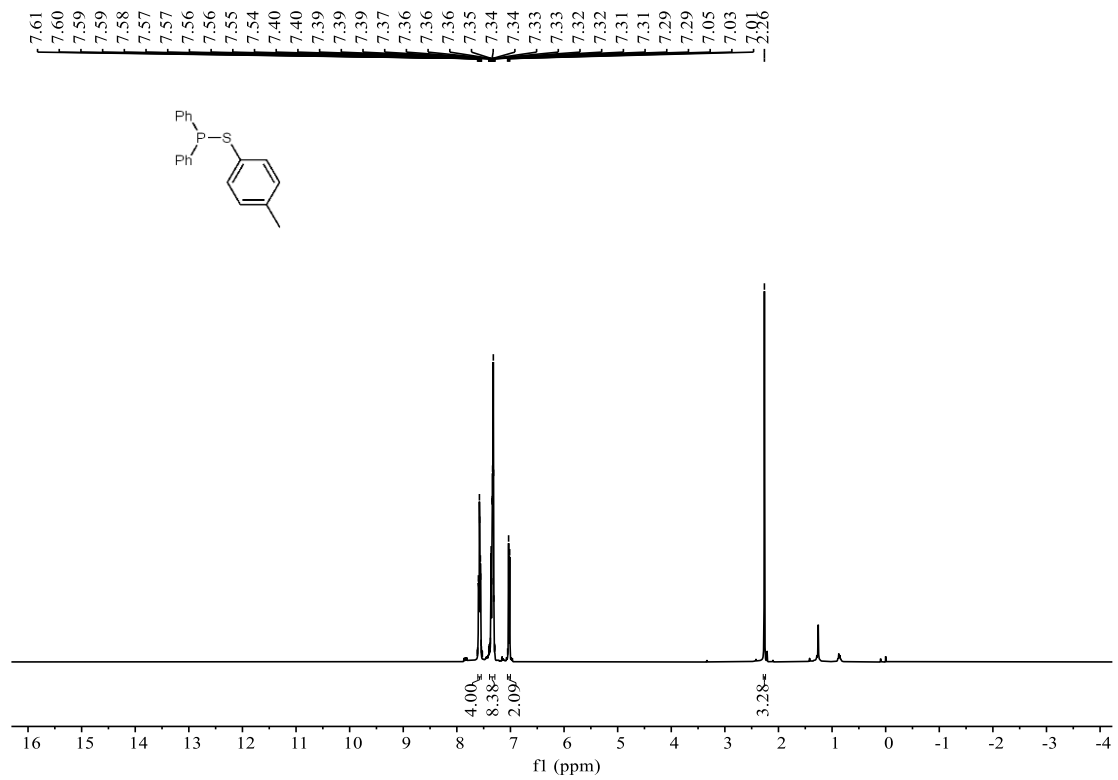

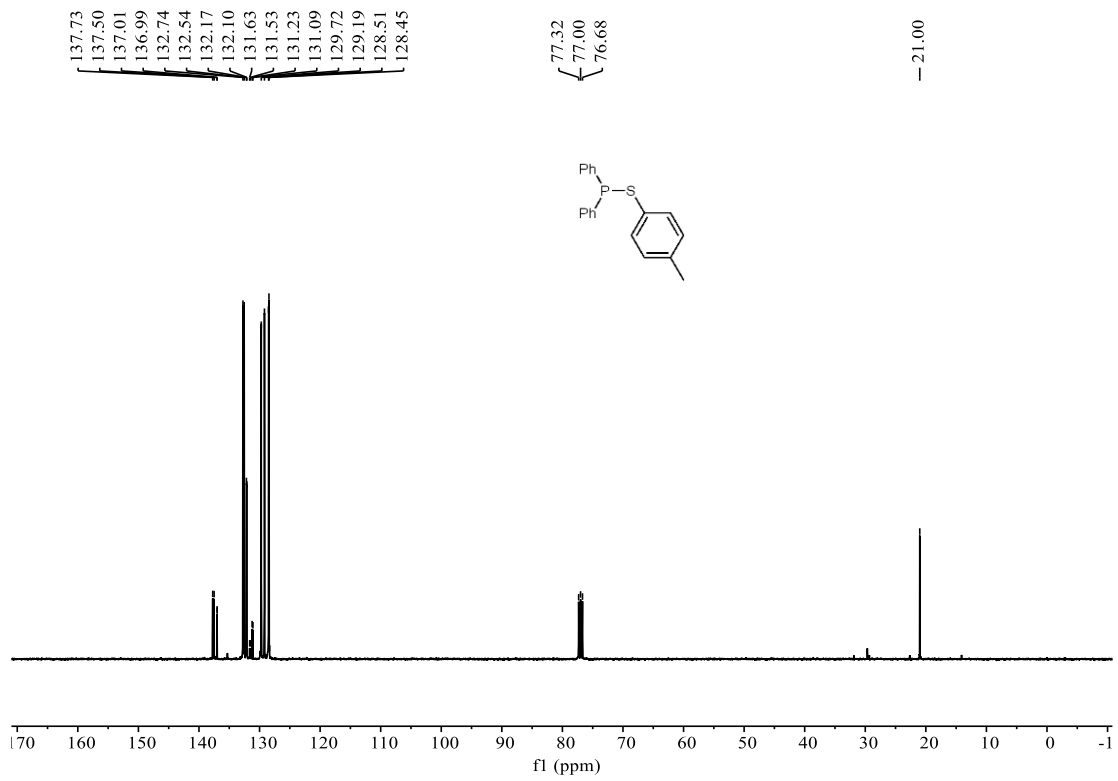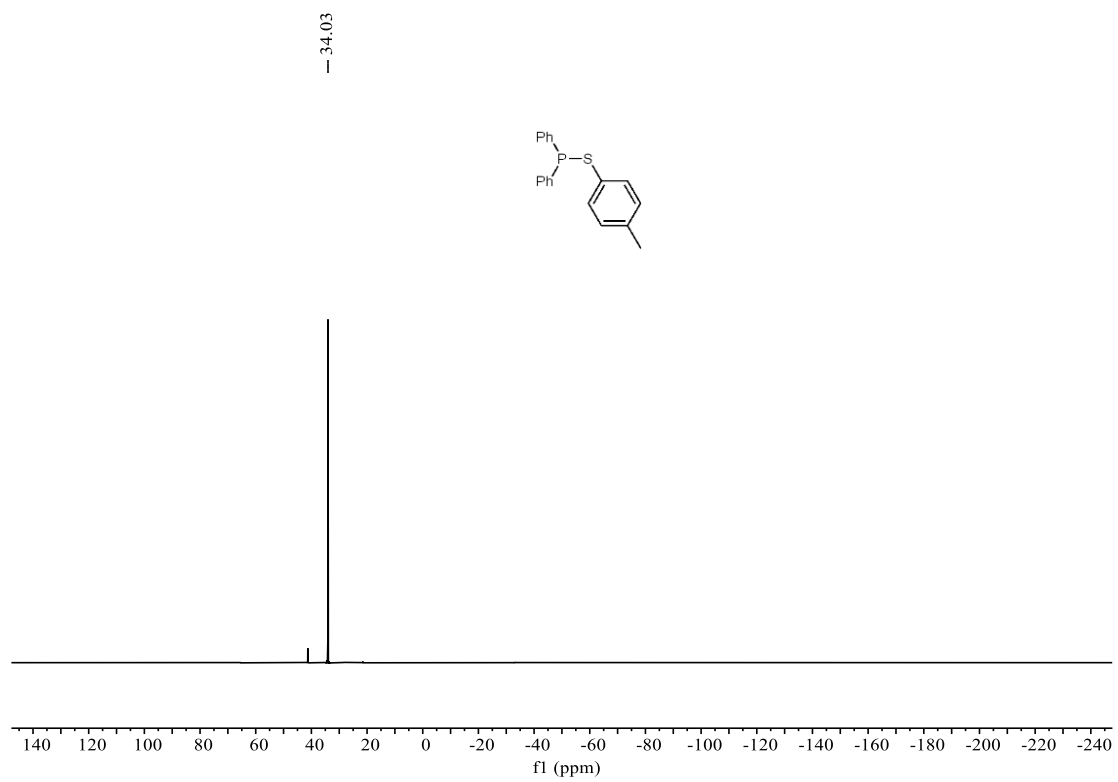

((4-(Tert-butyl)phenyl)thio)diphenylphosphane (4e)

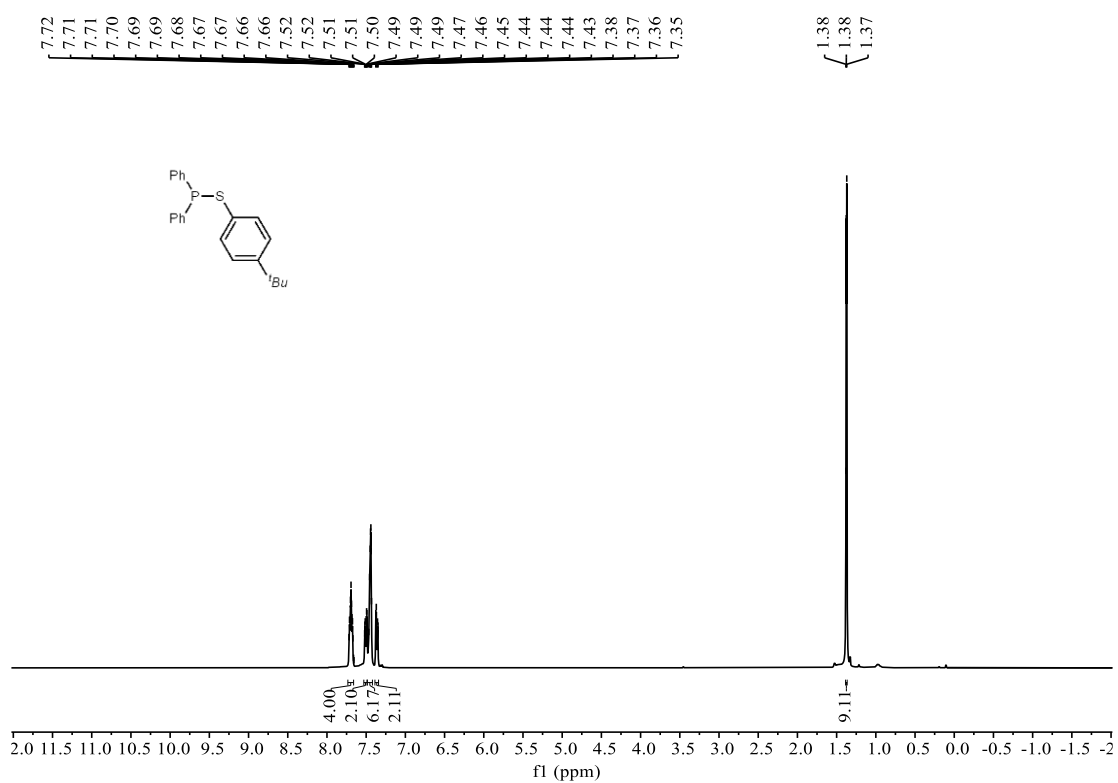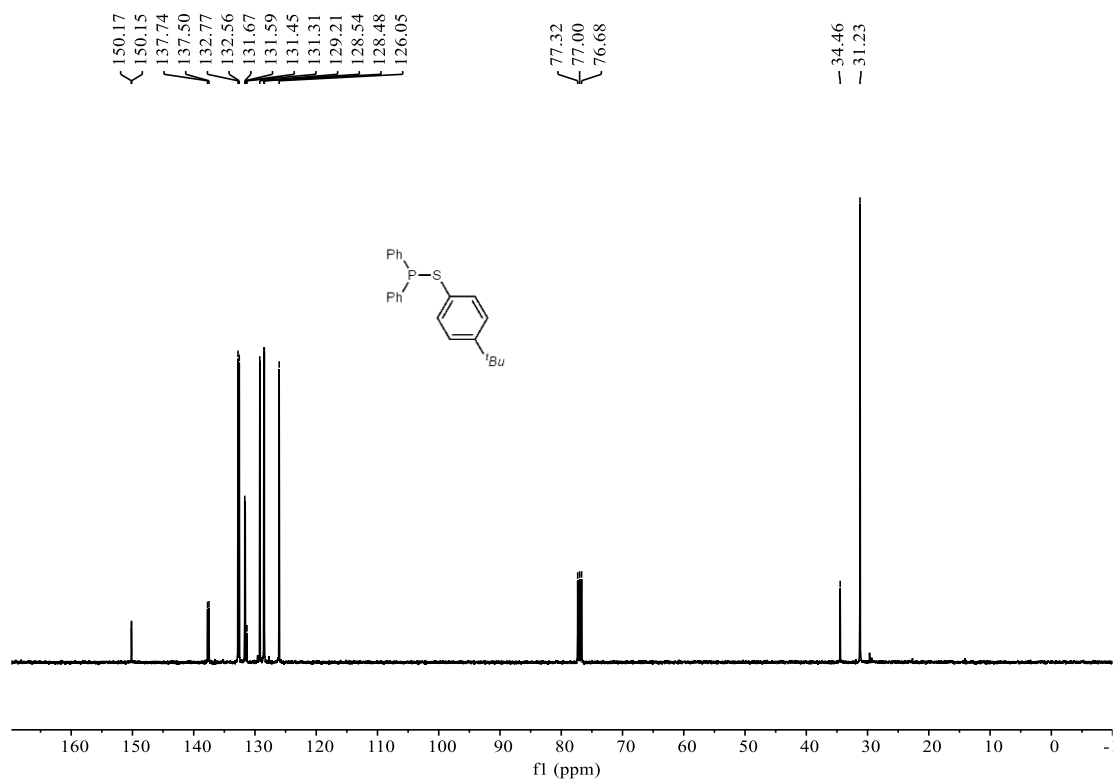

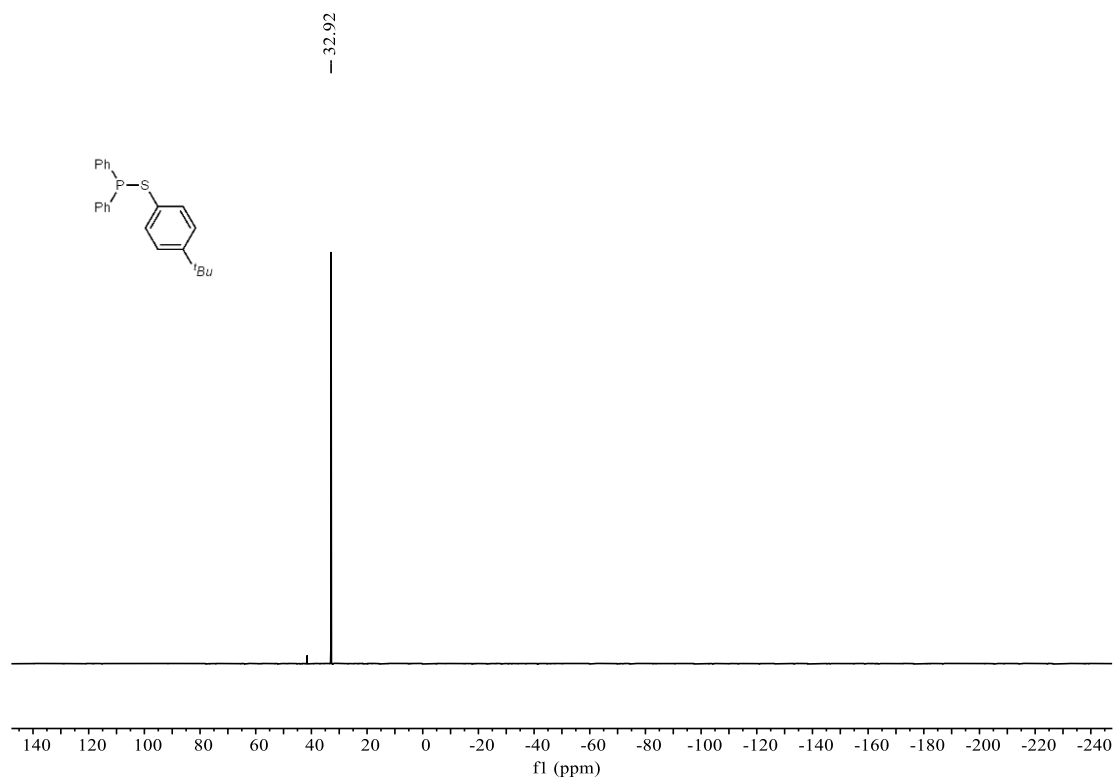

((4-Methoxyphenyl)thio)diphenylphosphane (**4f**)

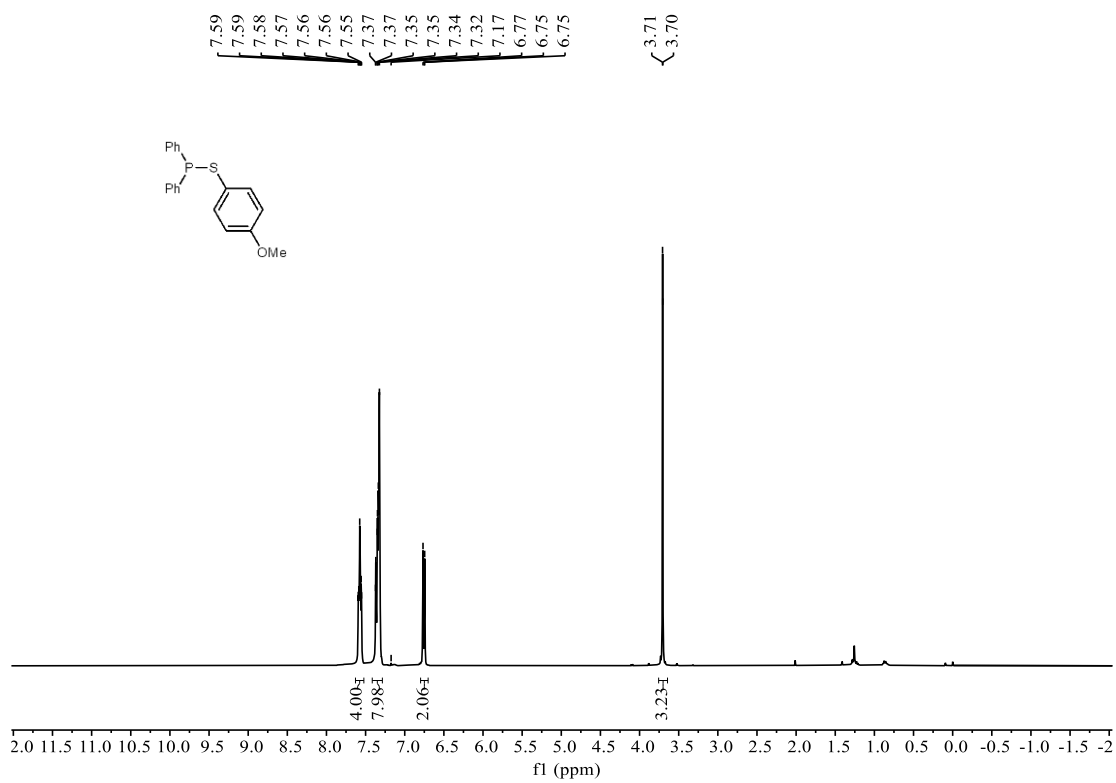

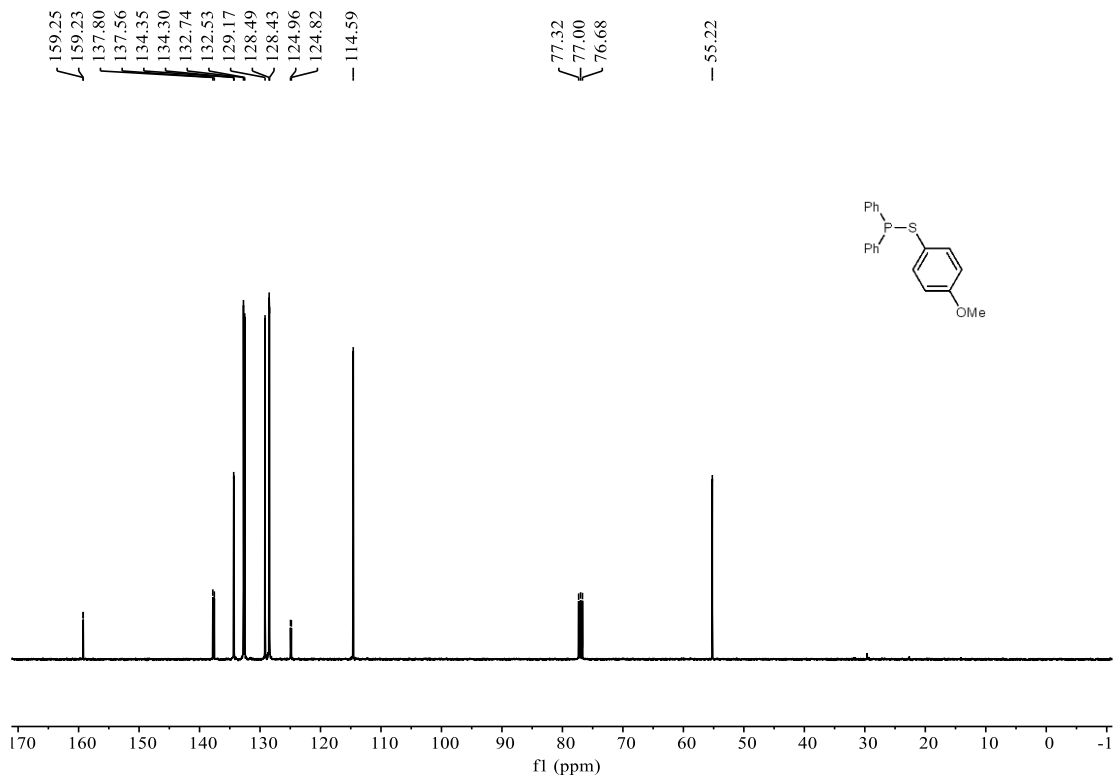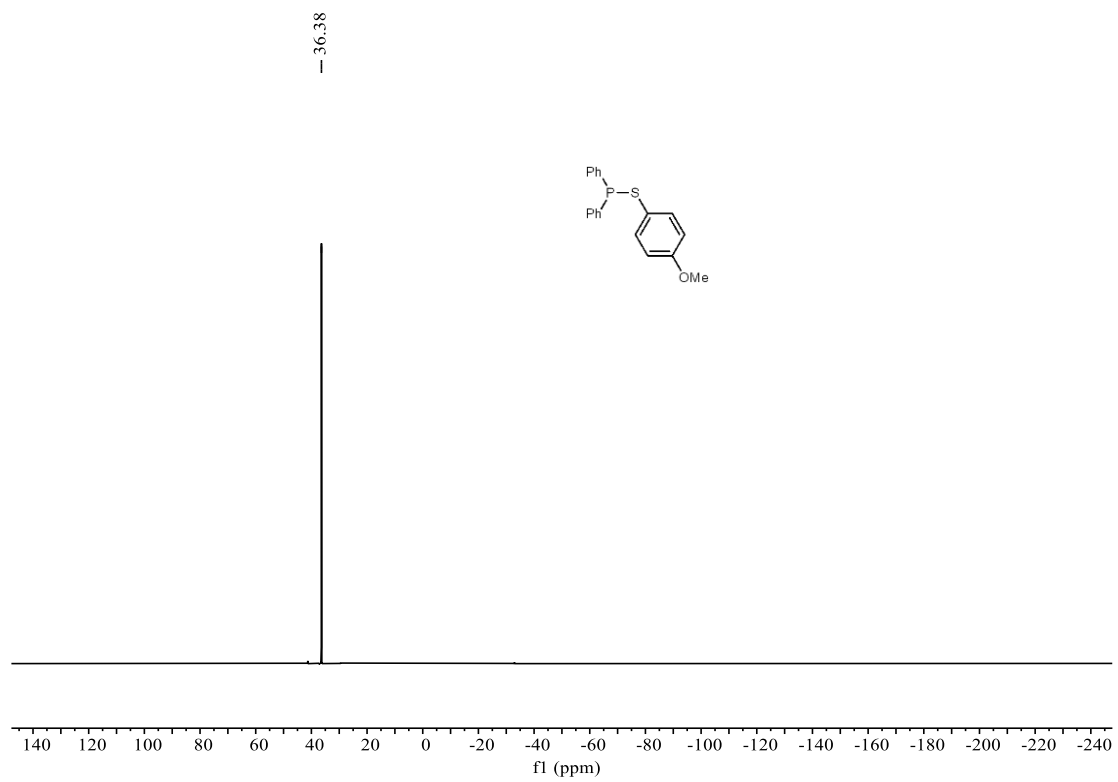

*N*-(4-((diphenylphosphaneyl)thio)phenyl)acetamide (**4g**)

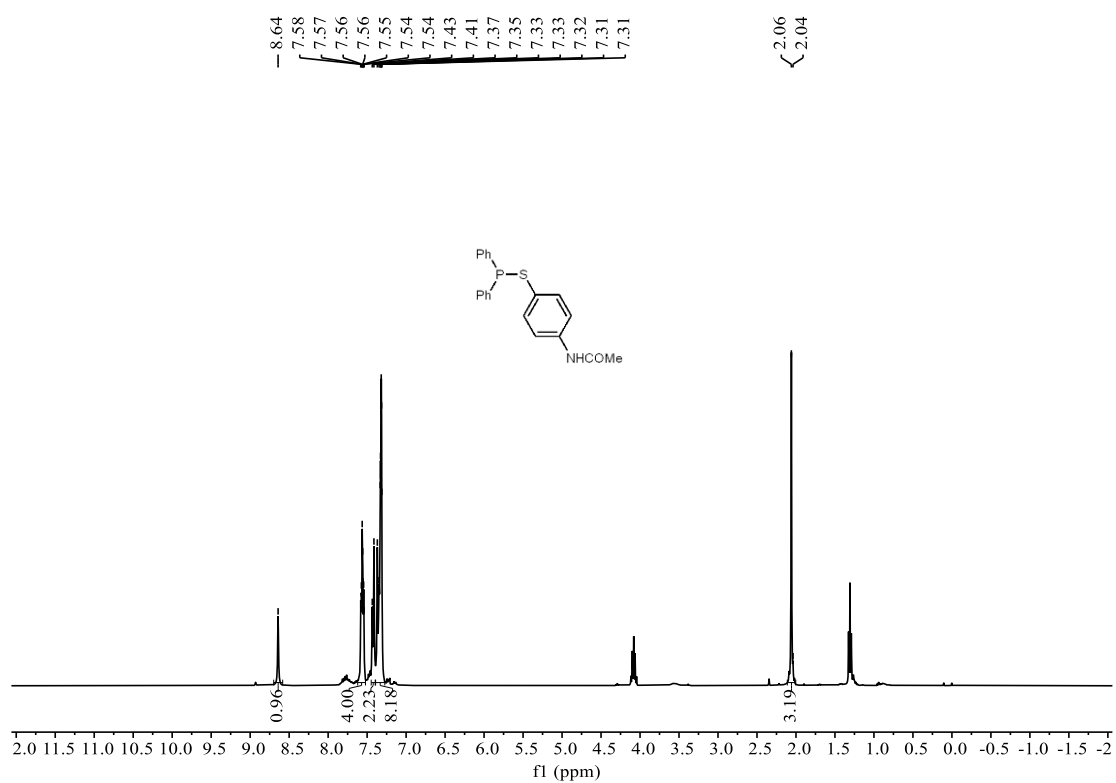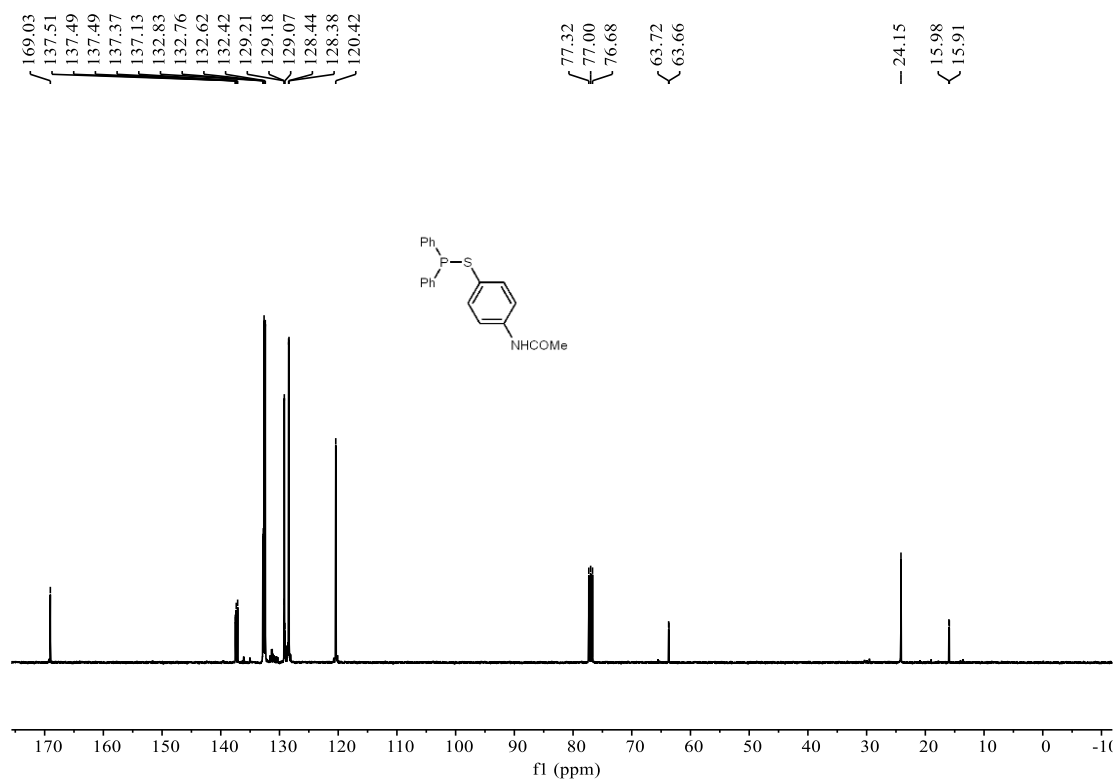

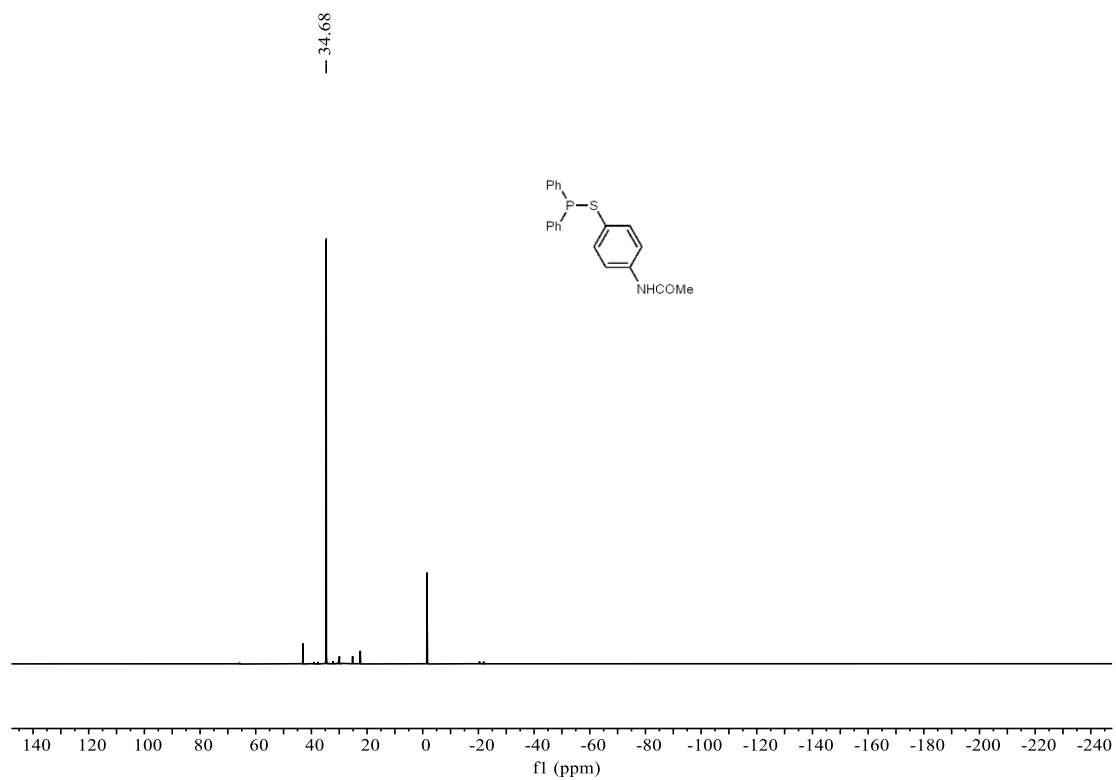

**((3-Fluorophenyl)thio)diphenylphosphane (4h)**

7.61  
7.59  
7.58  
7.57  
7.56  
7.56  
7.55  
7.54  
7.54  
7.53  
7.39  
7.37  
7.37  
7.36  
7.35  
7.35  
7.35  
7.25  
7.23  
7.22  
7.21  
7.21  
7.20  
7.18  
7.18  
7.16  
7.14  
6.90  
6.88  
6.88  
6.86  
6.86

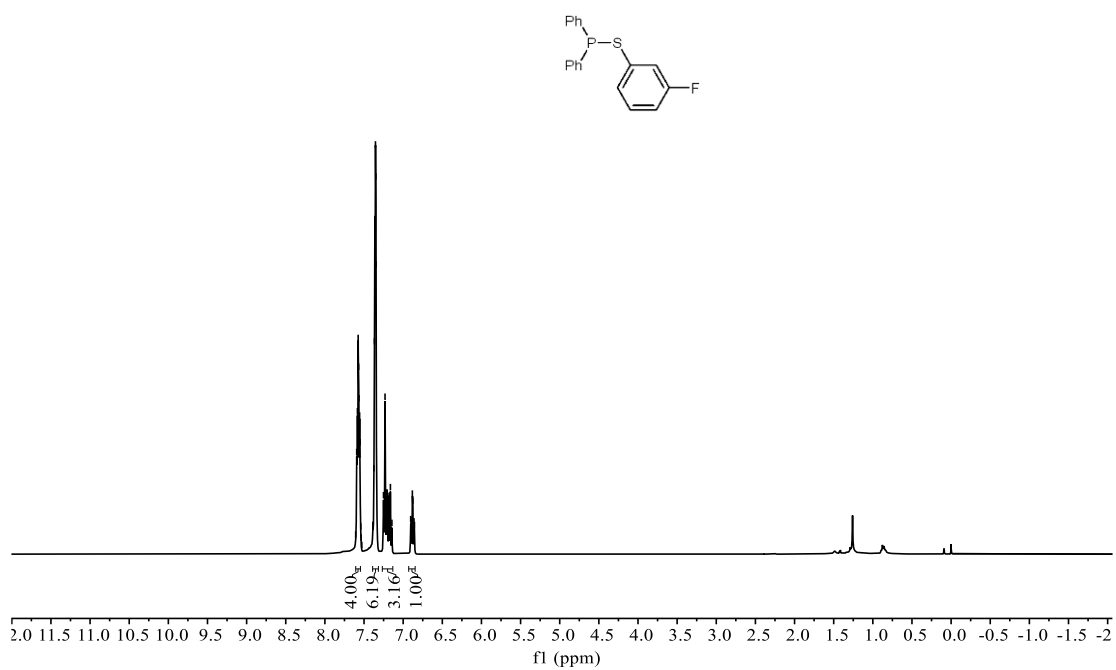

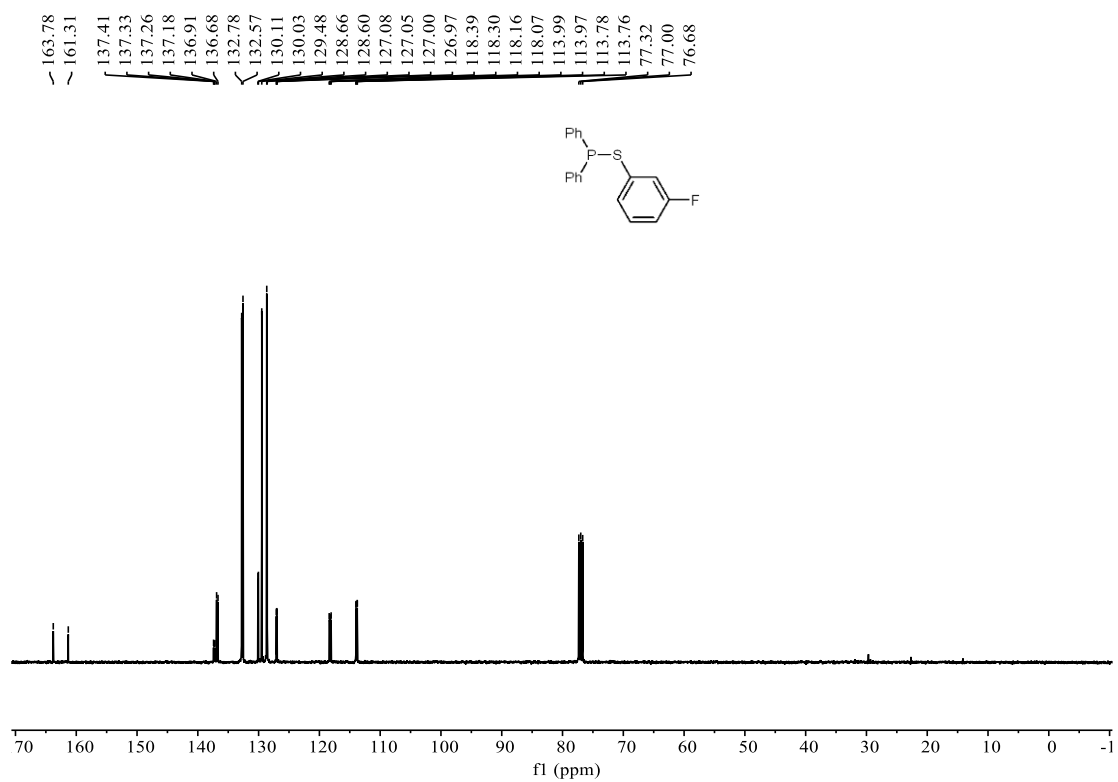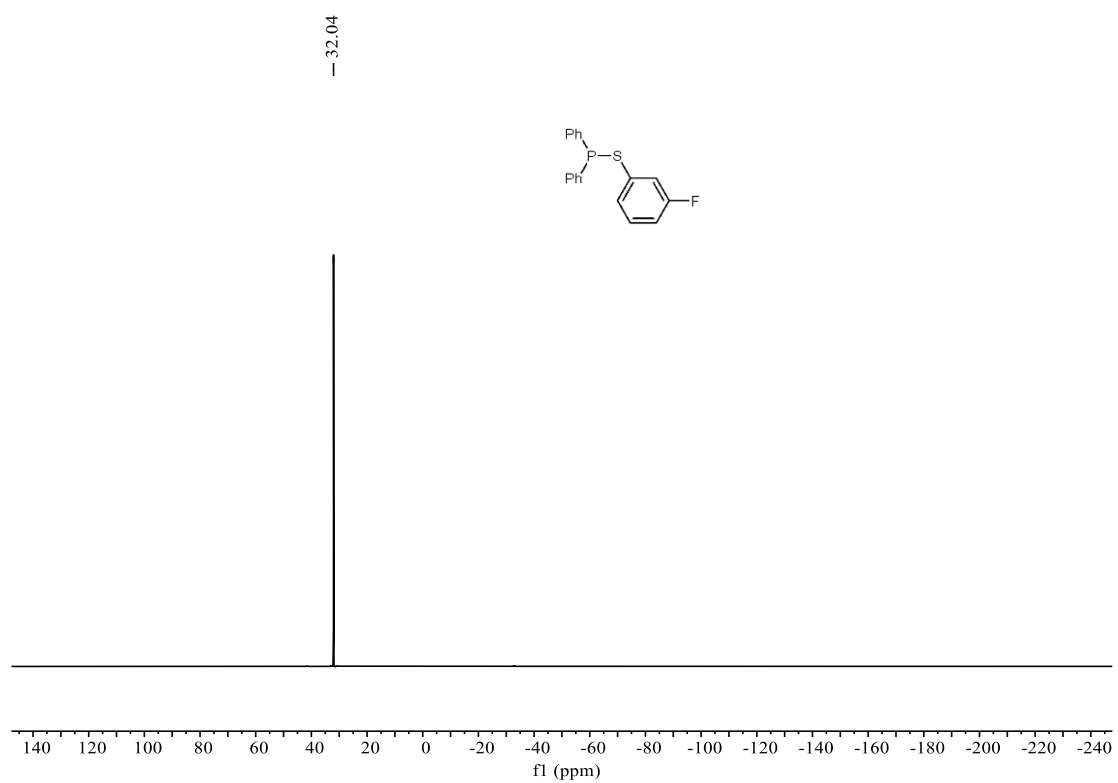

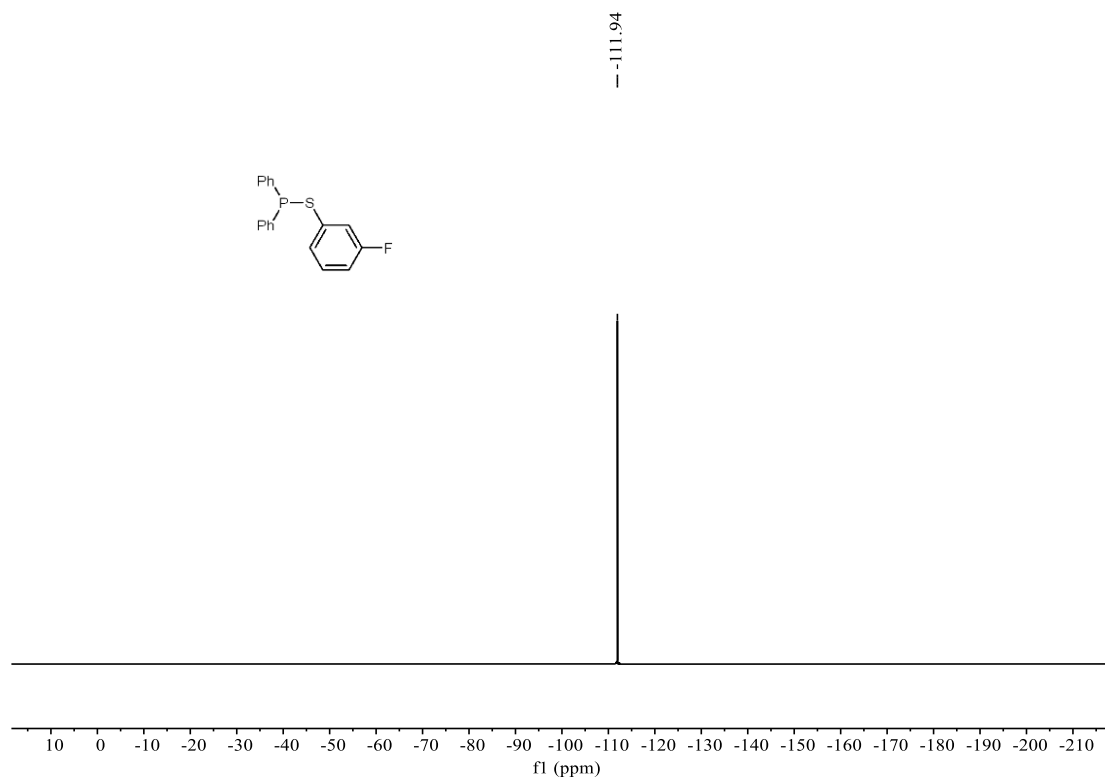

**((2-Fluorophenyl)thio)diphenylphosphane (4i)**

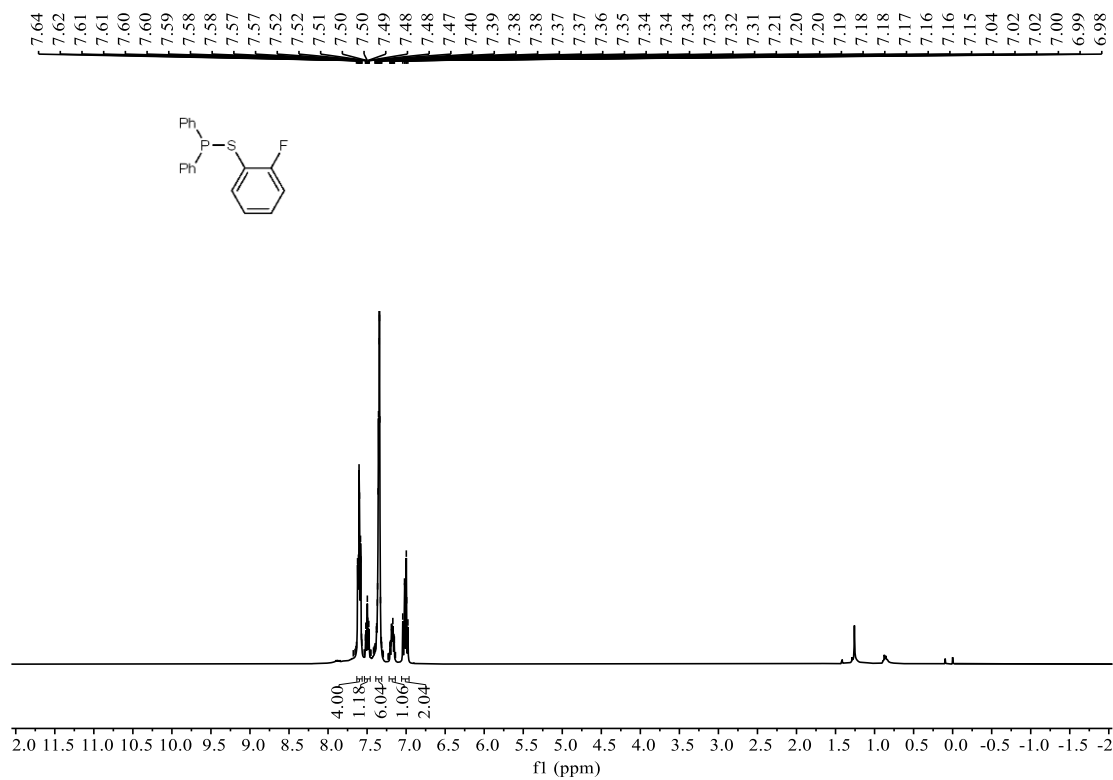

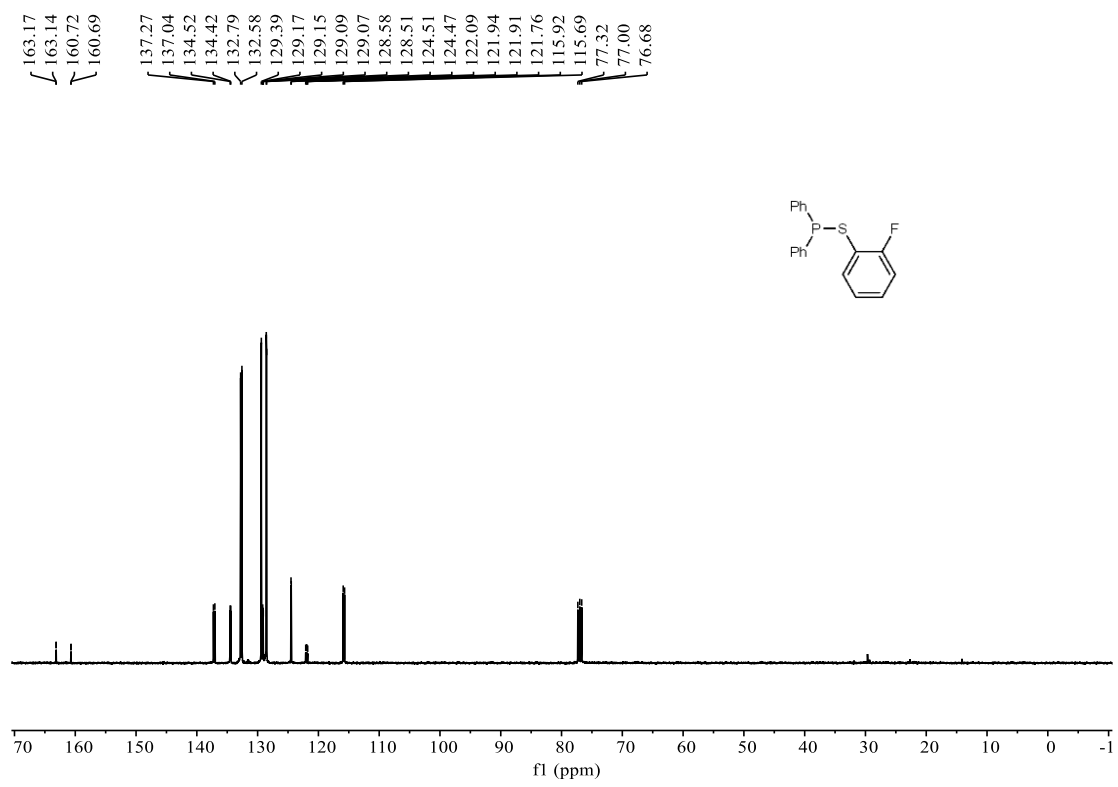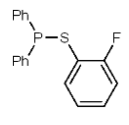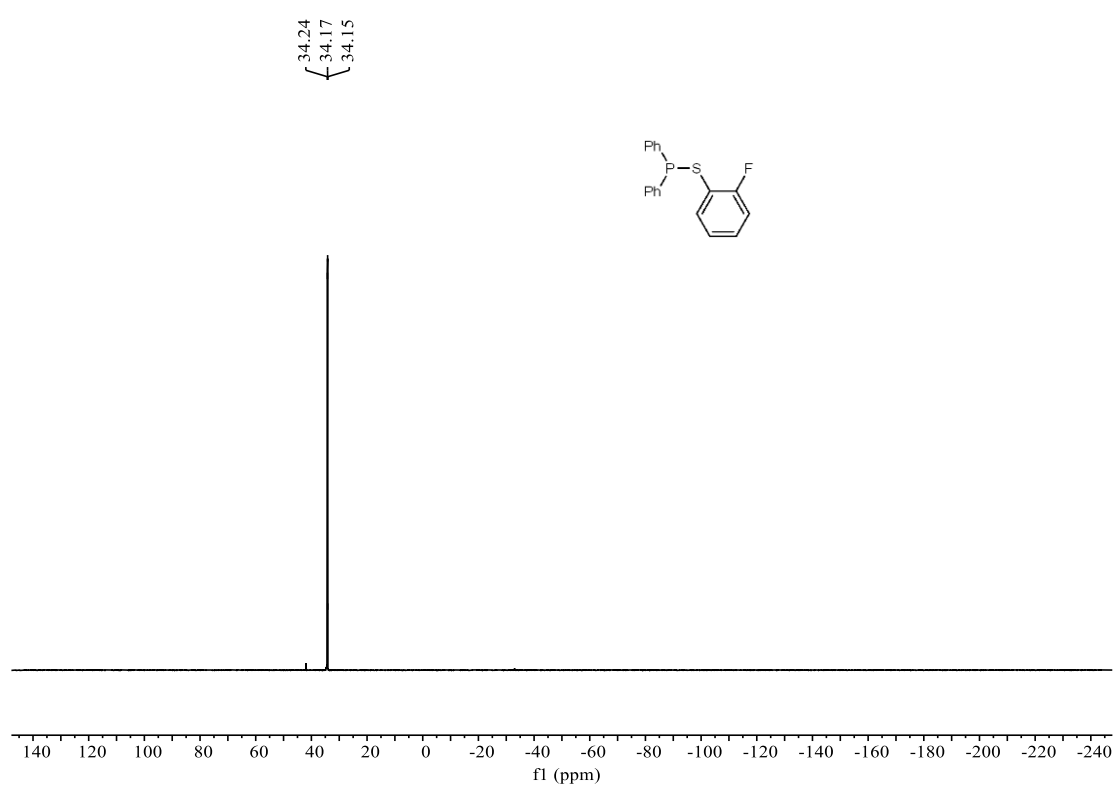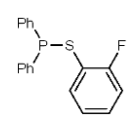

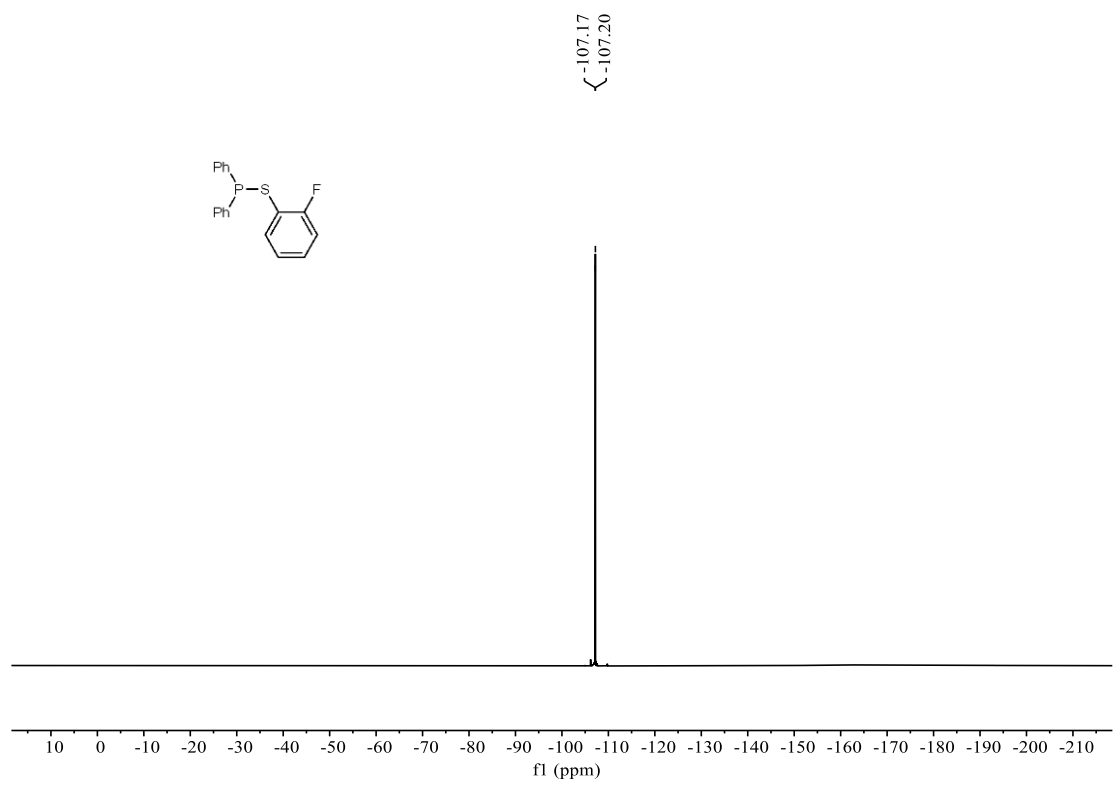

**((2,4-Difluorophenyl)thio)diphenylphosphane (4j)**

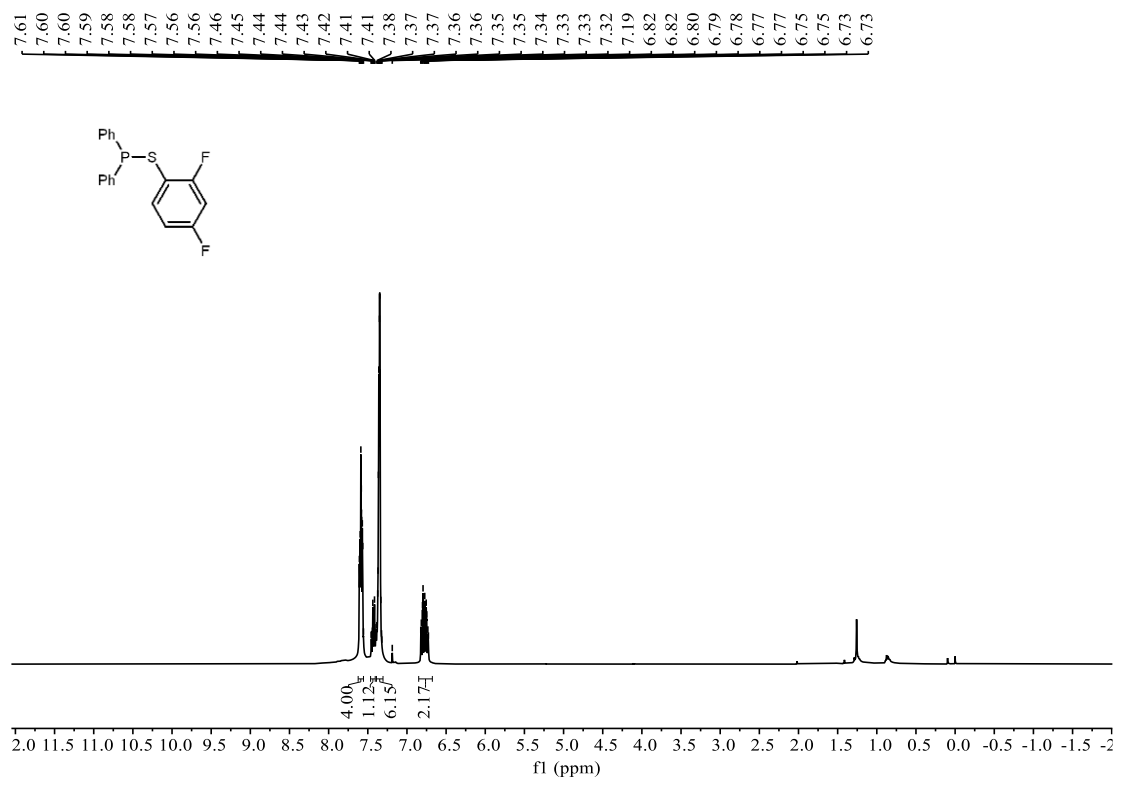

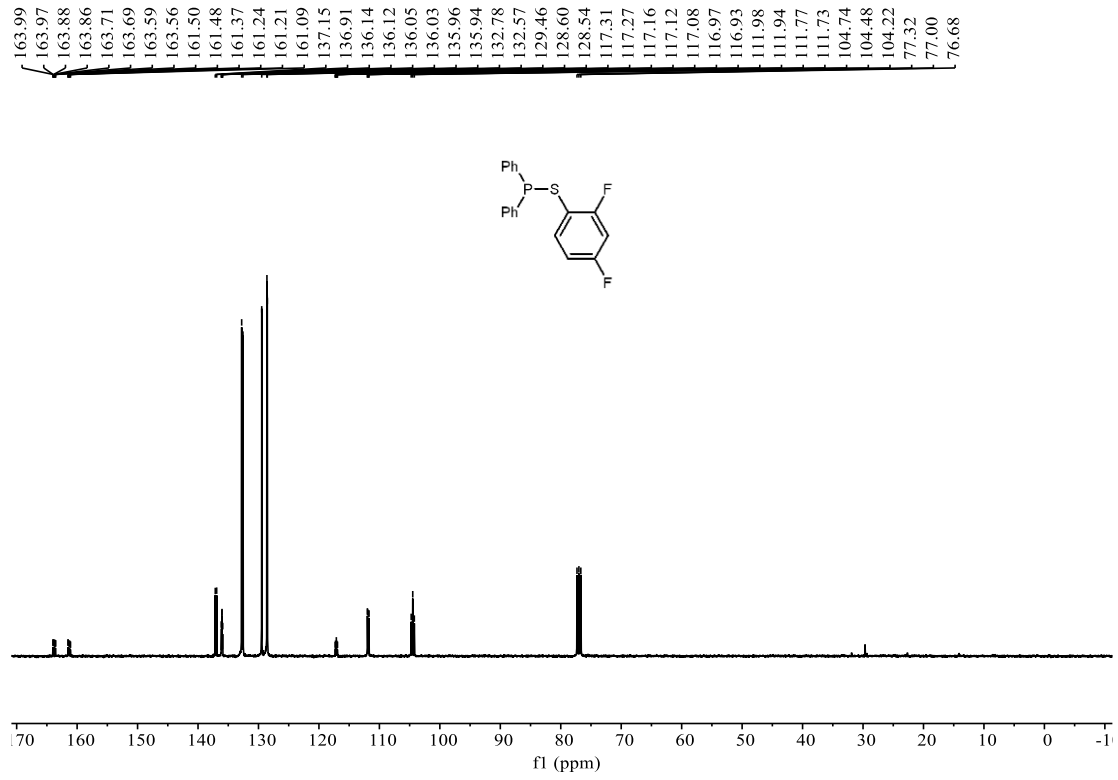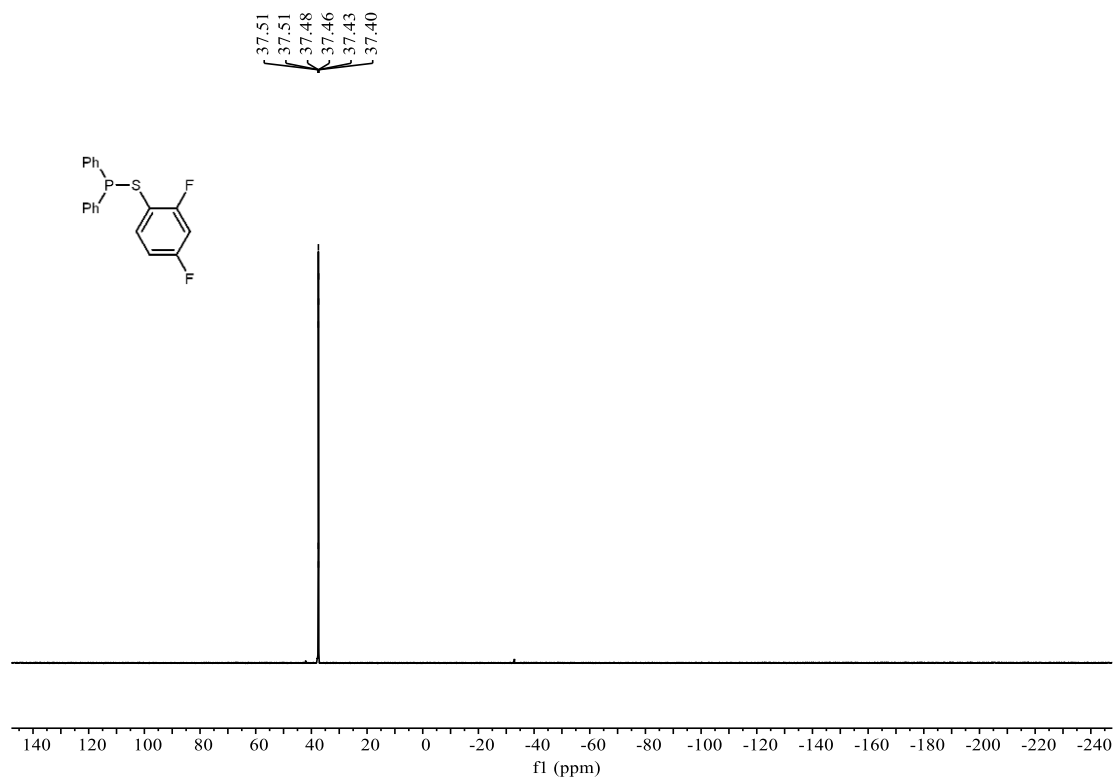

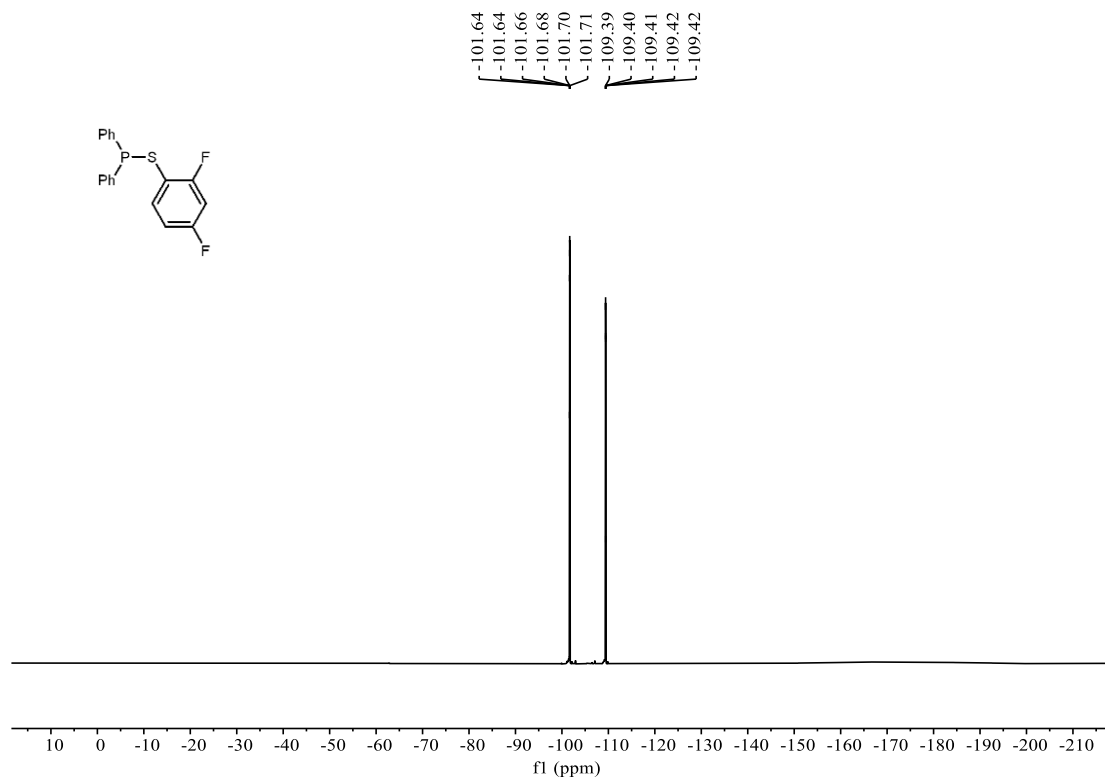

**((2,4-Dimethylphenylthio)diphenylphosphane (4k))**

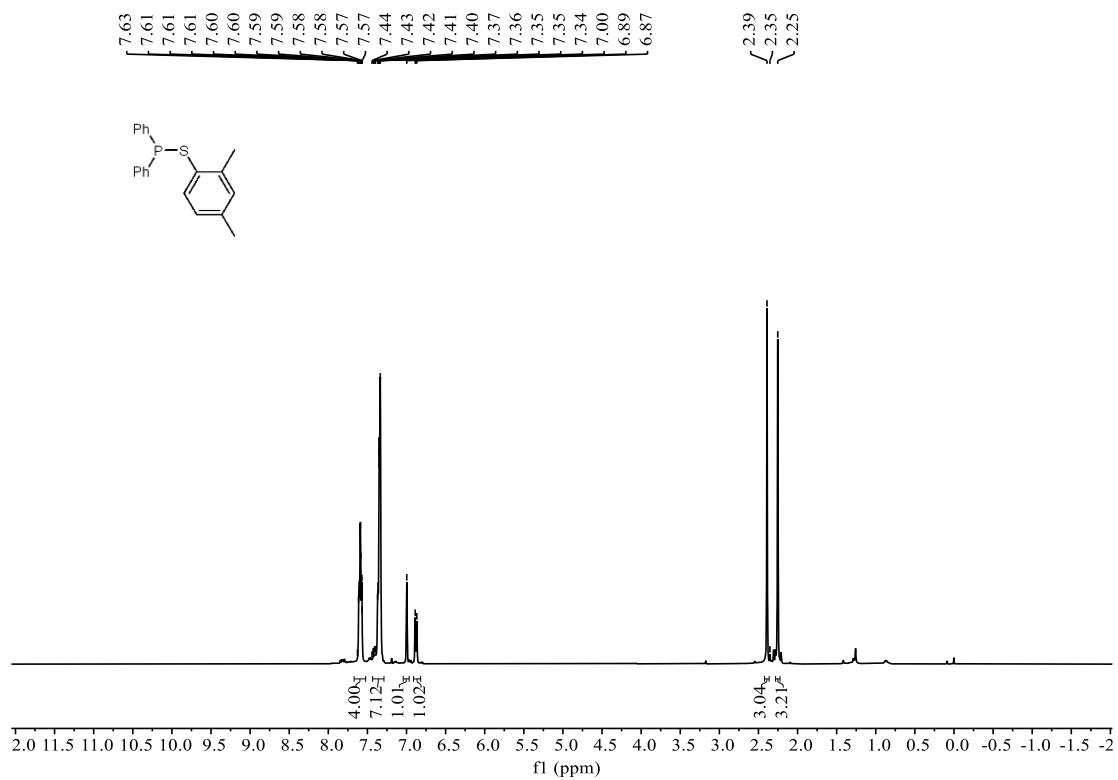

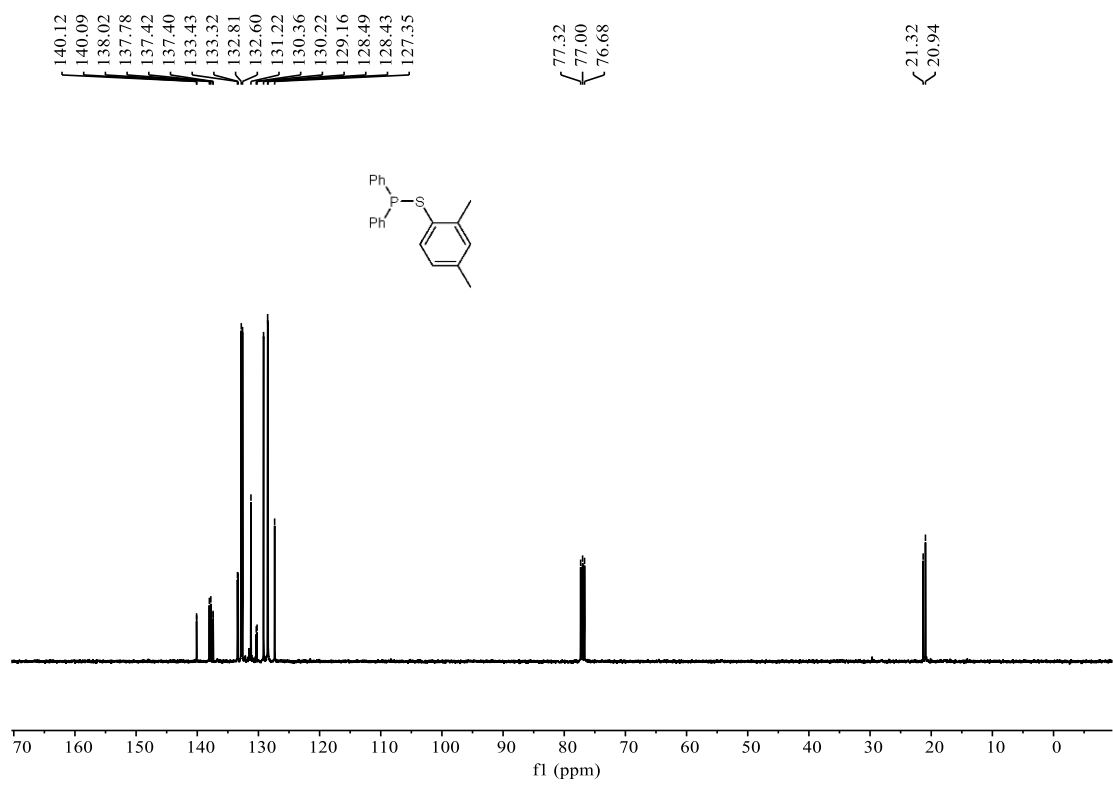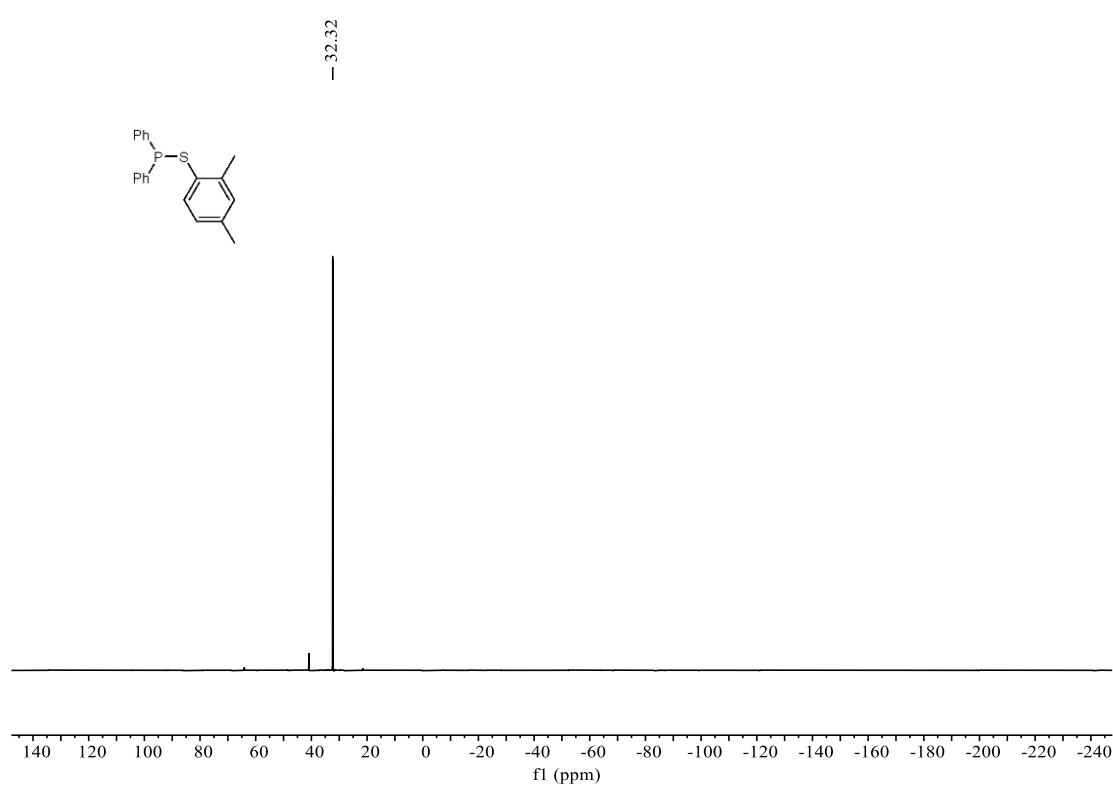

((2,6-Dimethylphenyl)thio)diphenylphosphane (**4l**)

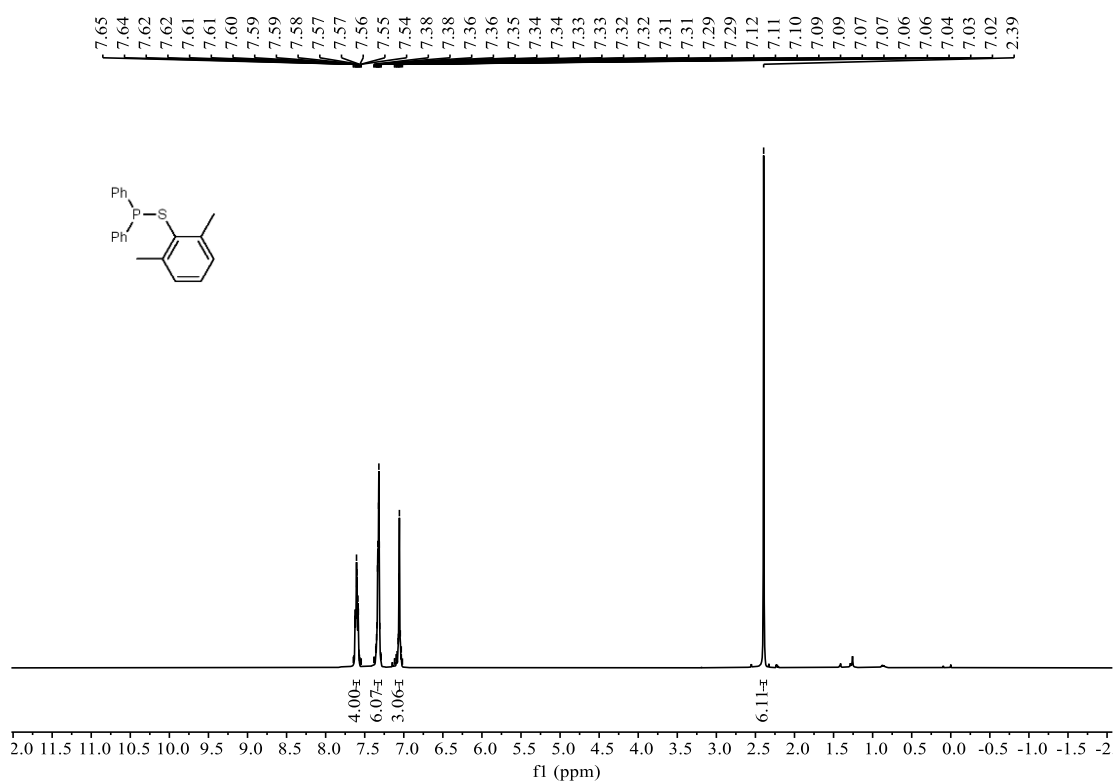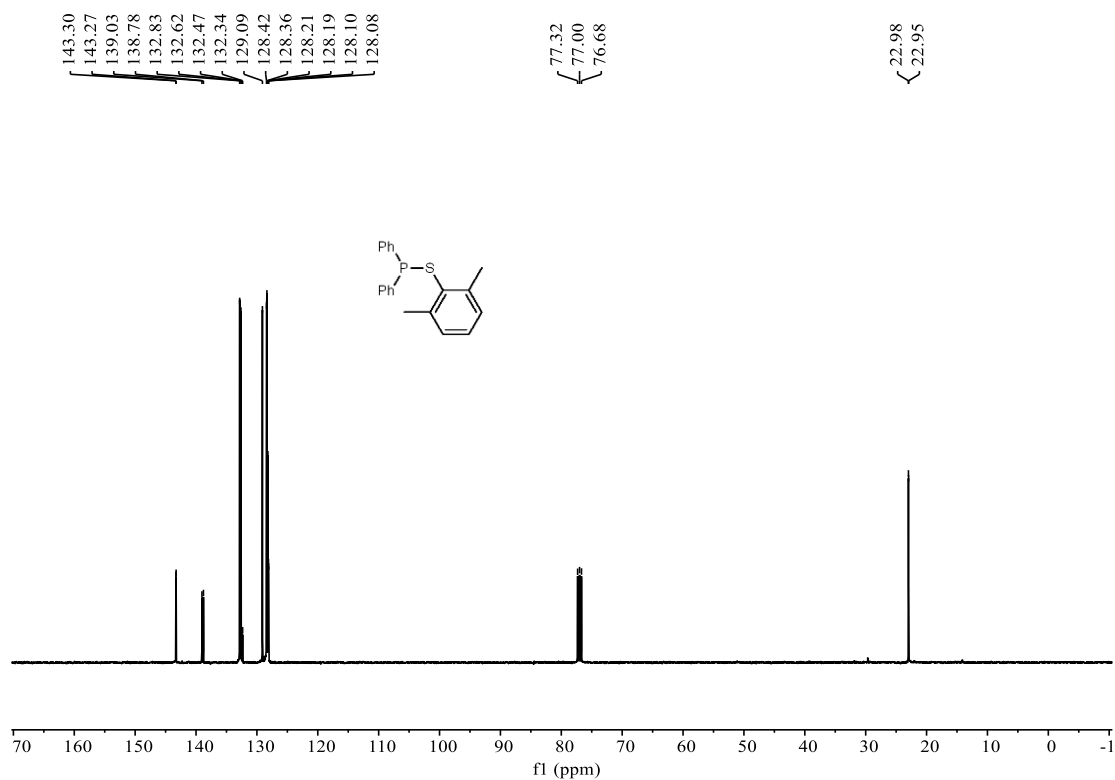

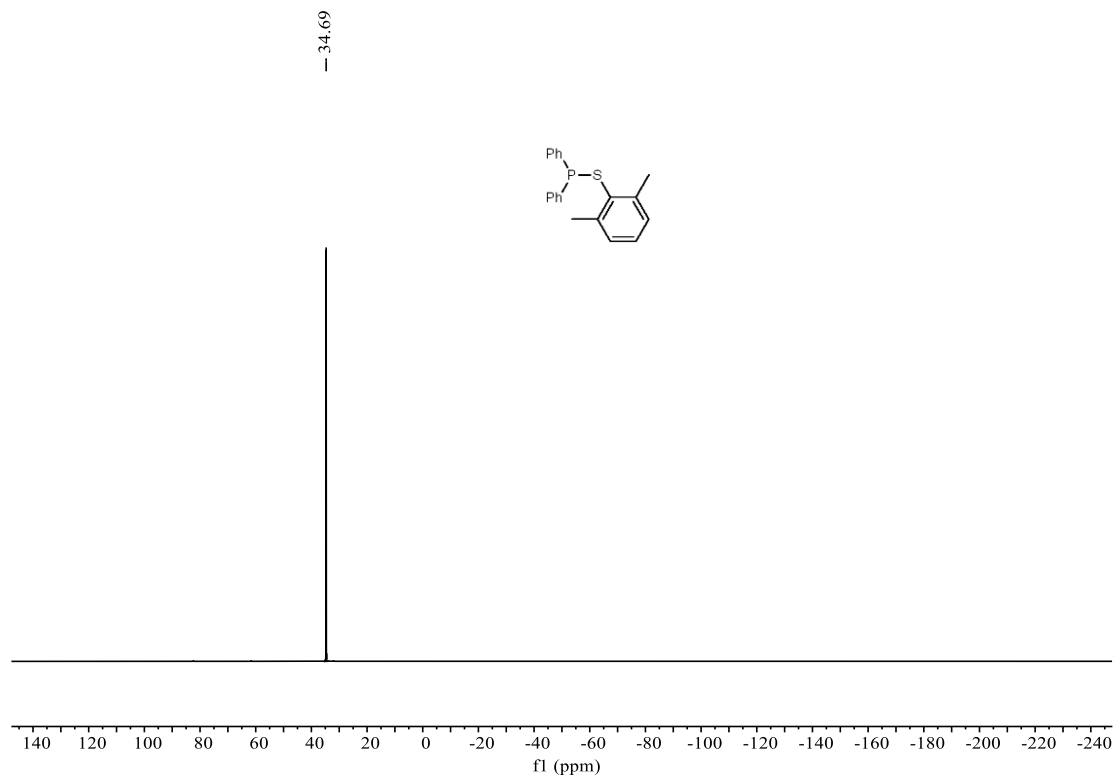

**((3,5-Bis(trifluoromethyl)phenyl)thio)diphenylphosphane (4m)**

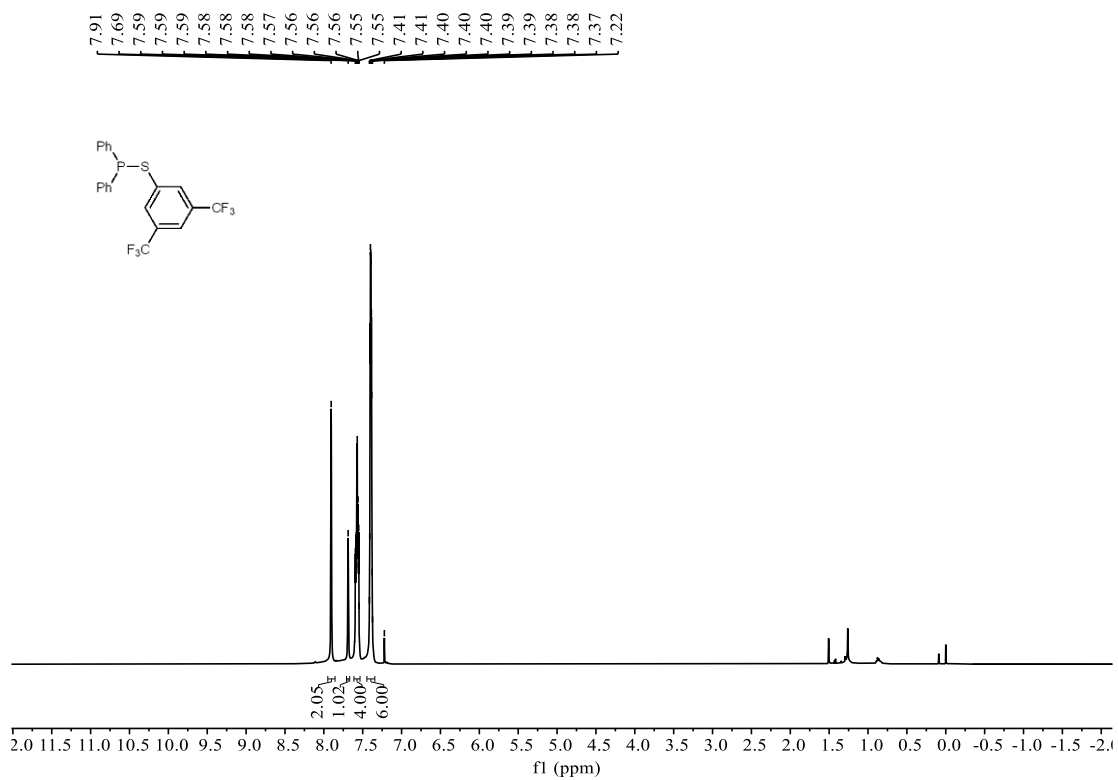

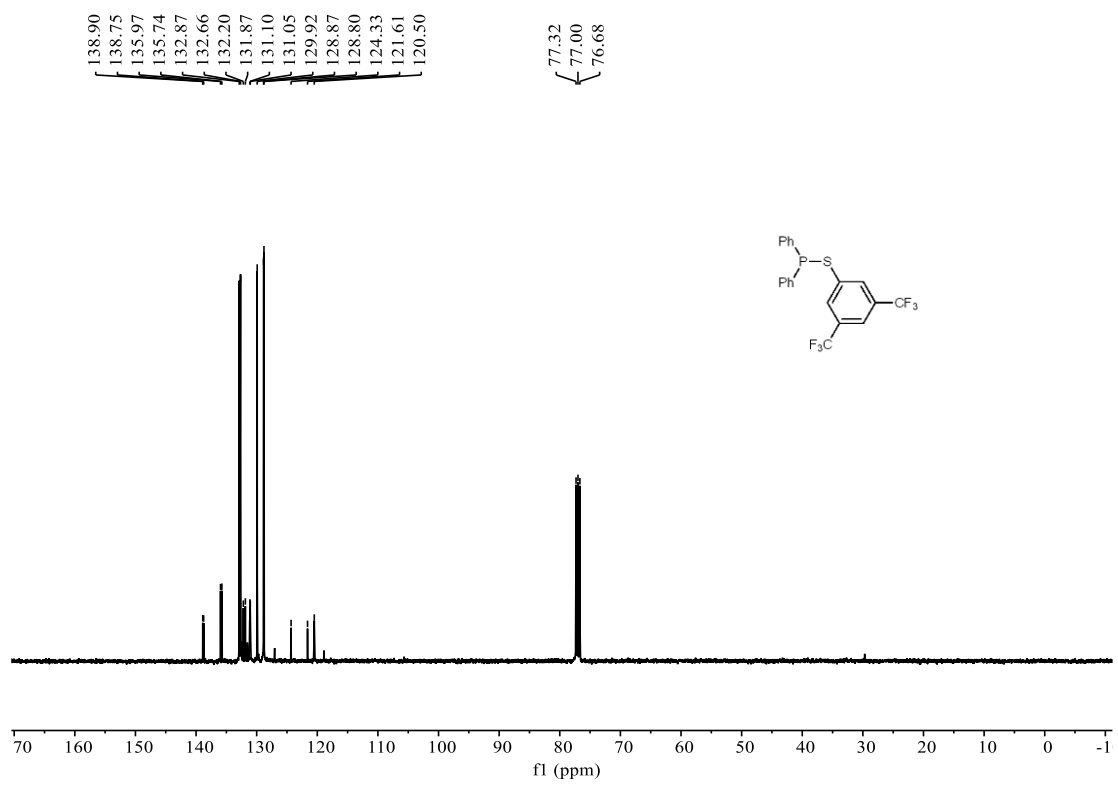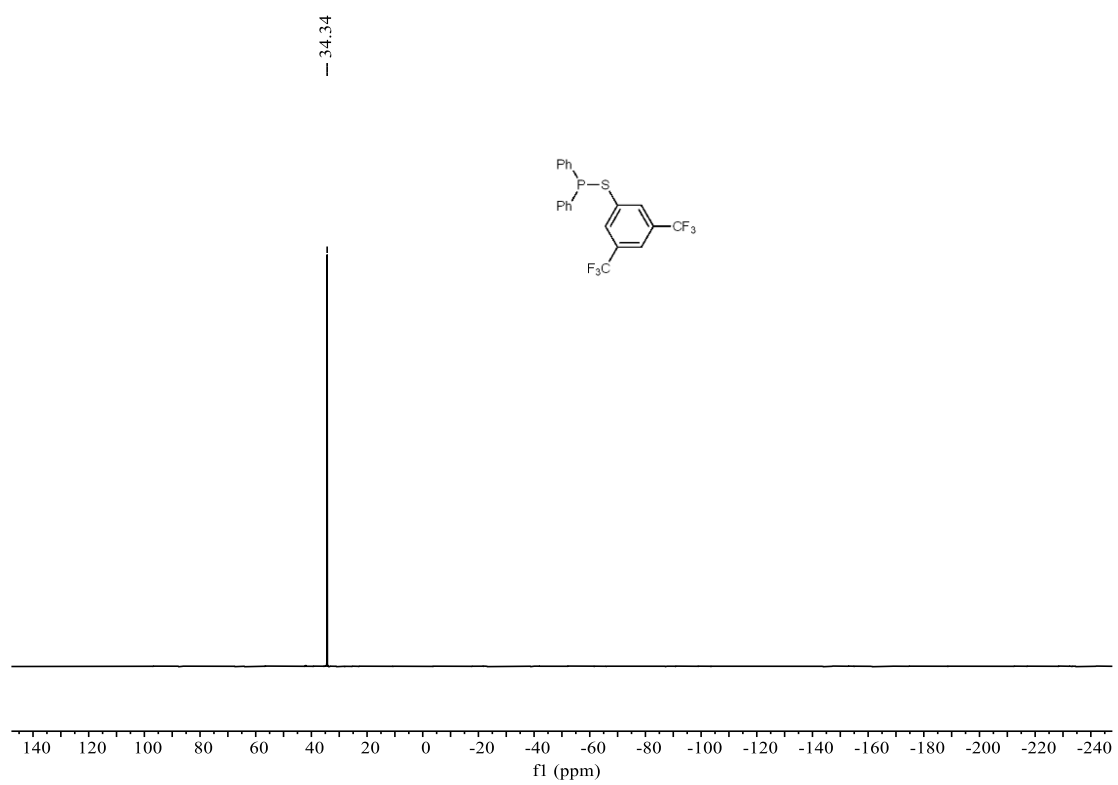

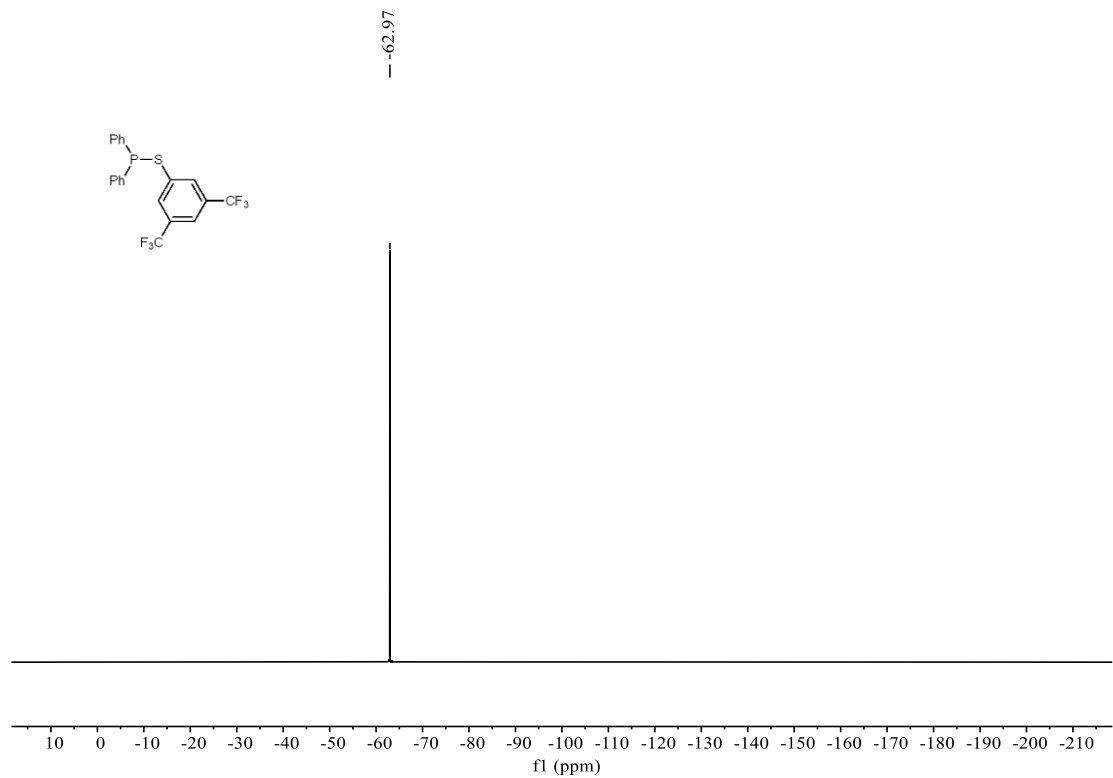

**Pyridin-2-yl diphenylphosphinodithioate (4n')**

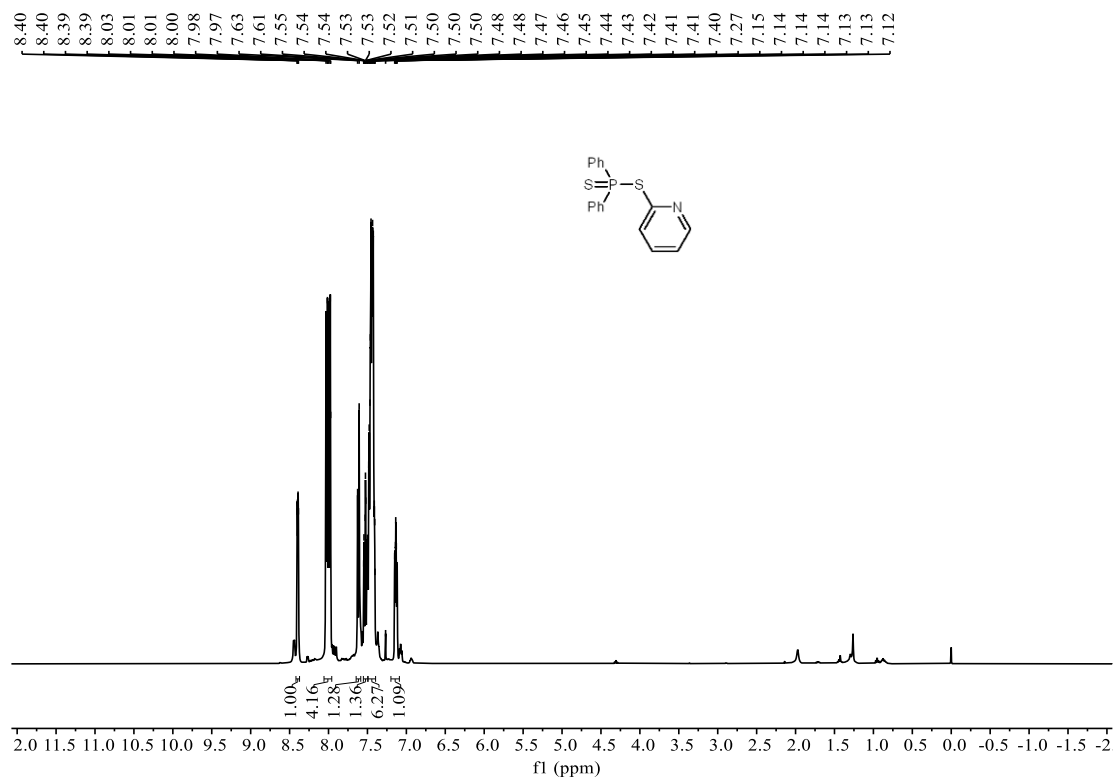

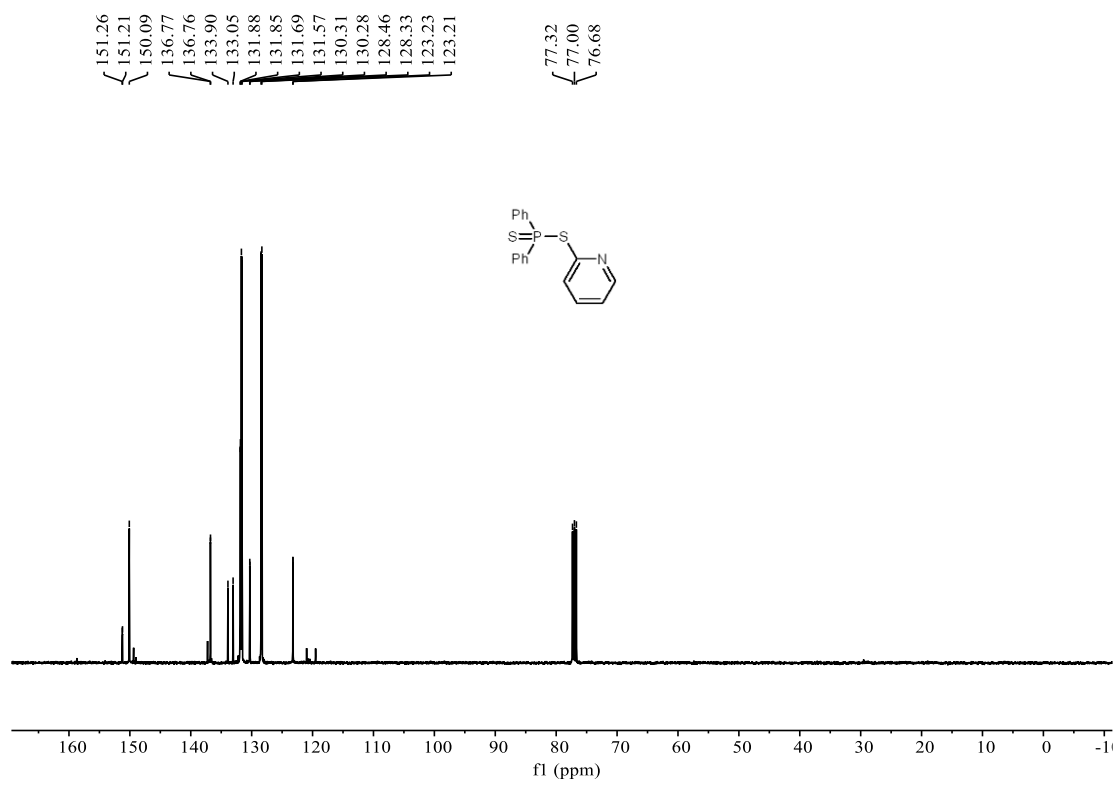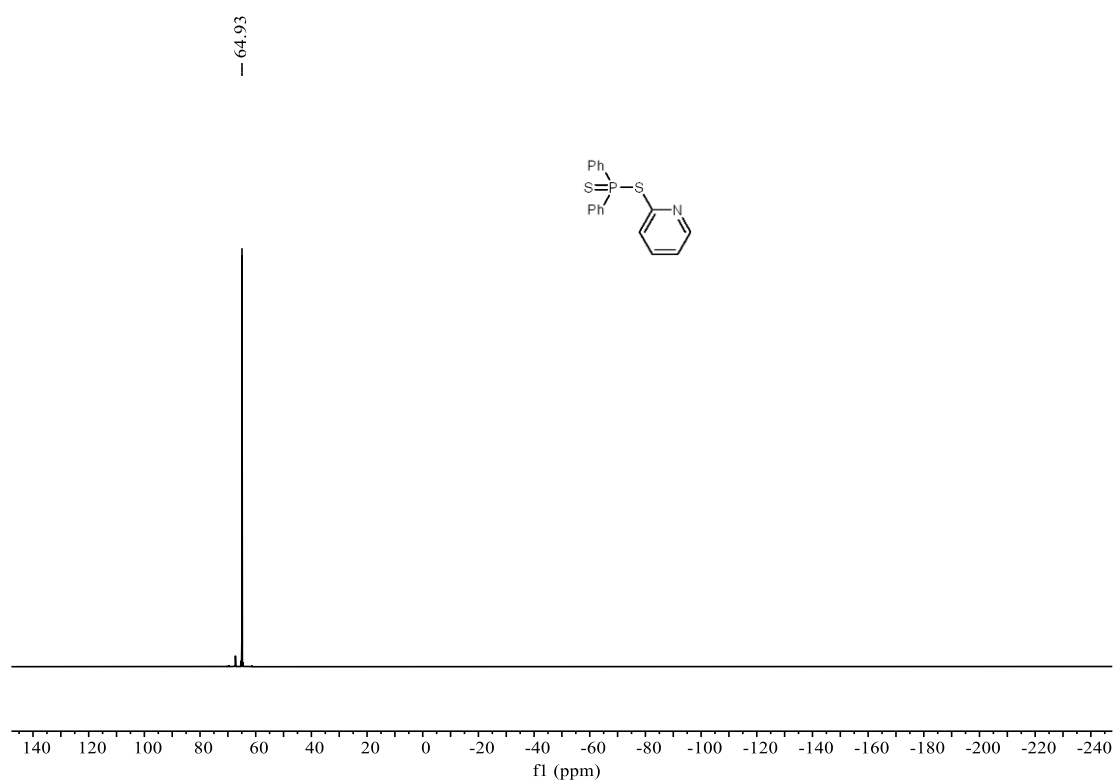

Butyl diphenylphosphinodithioate (**40'**)

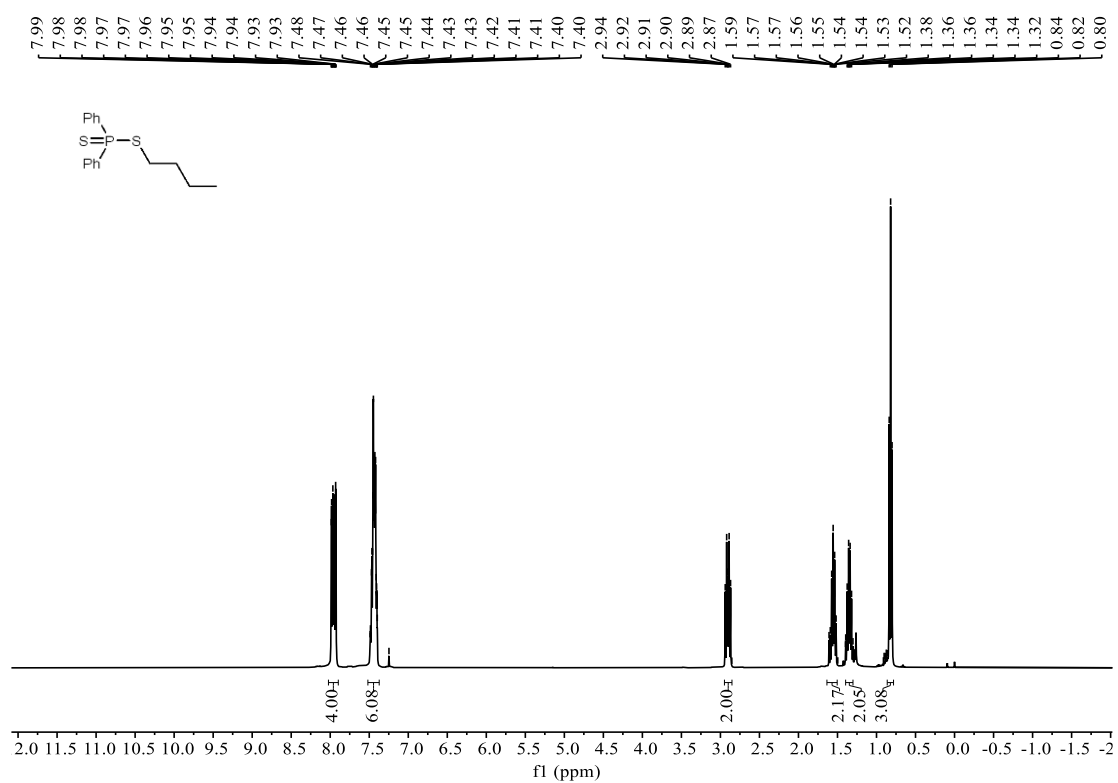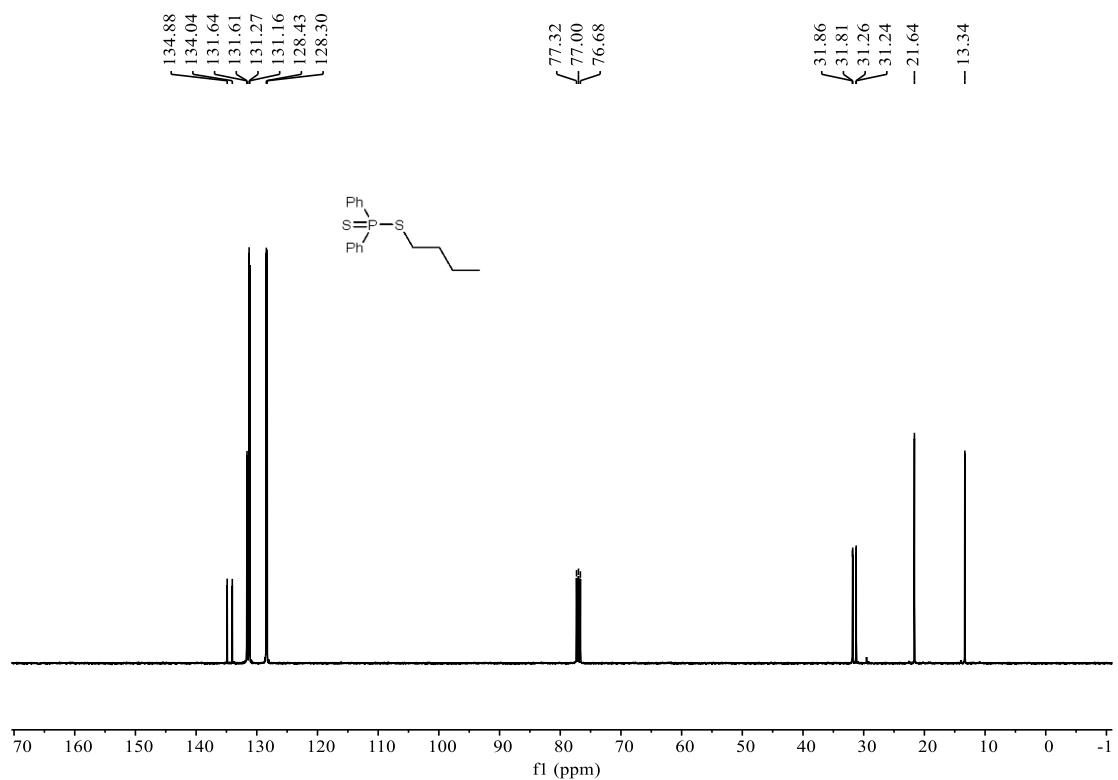

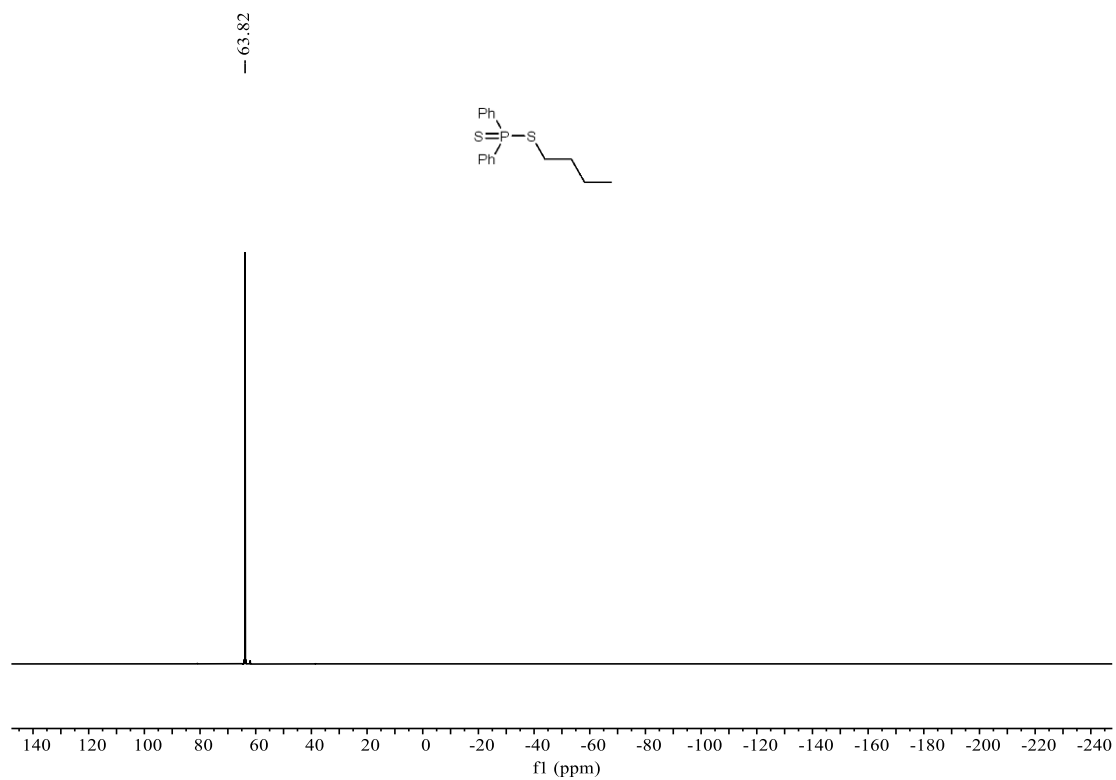

Octyl diphenylphosphinodithioate (**4p'**)

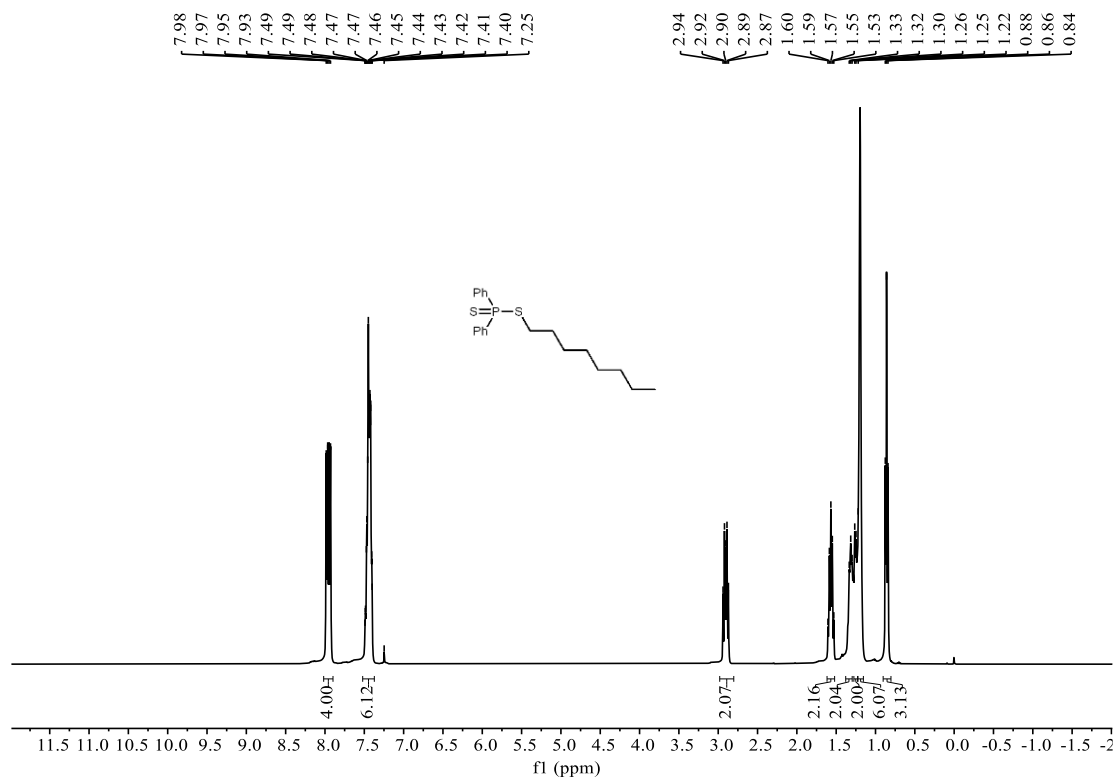

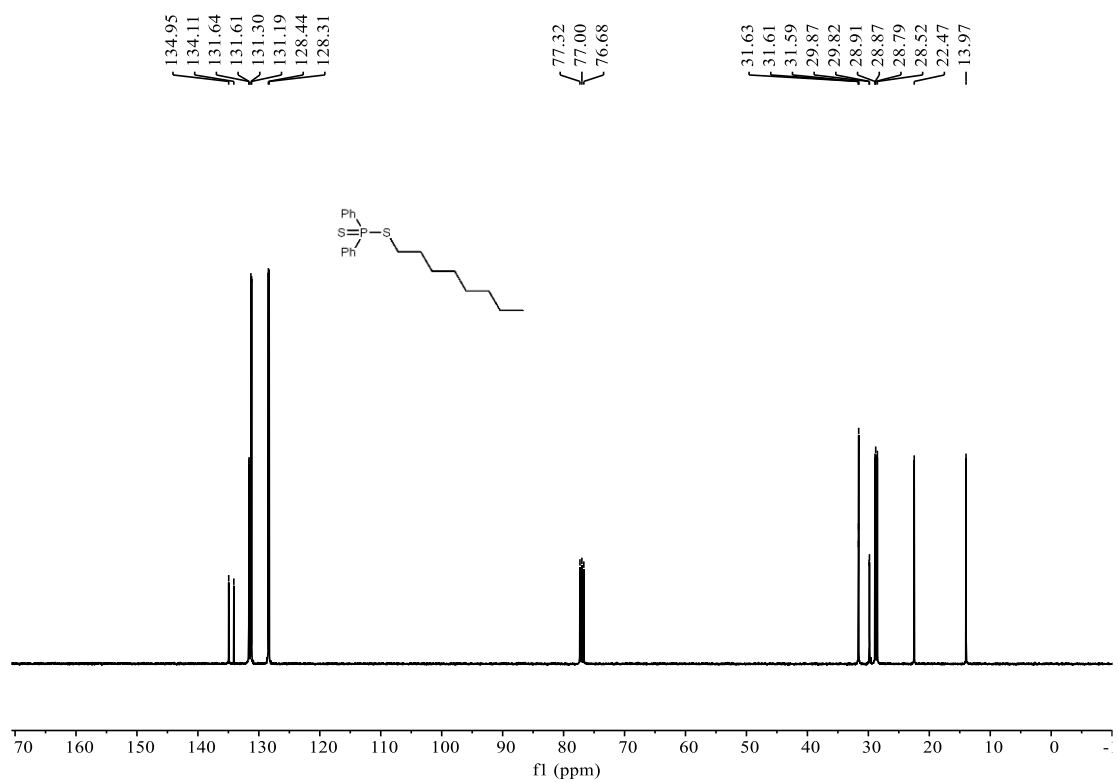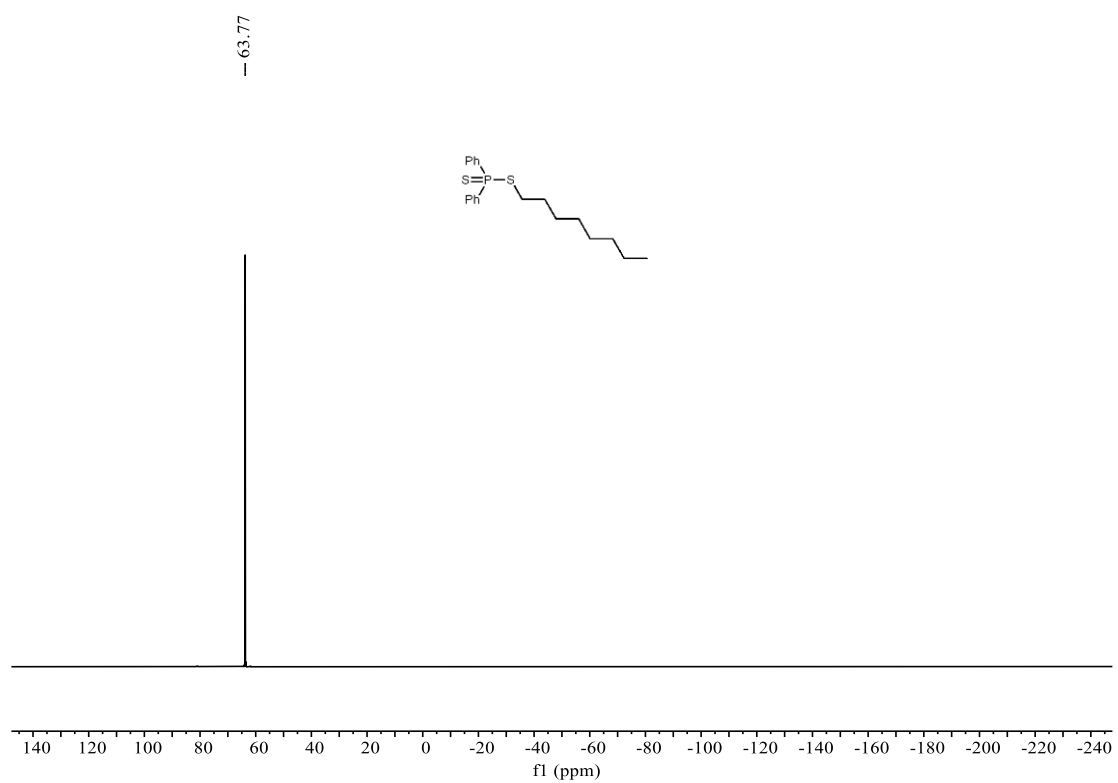

Dodecyl diphenylphosphinodithioate (**4q'**)

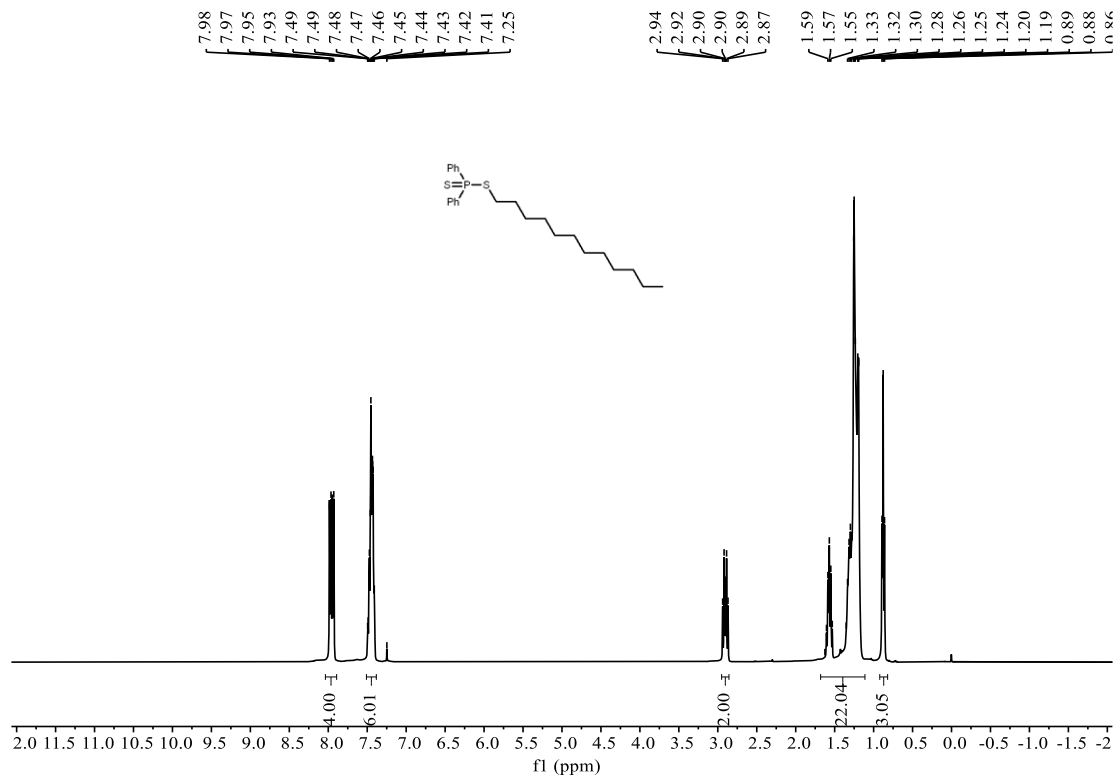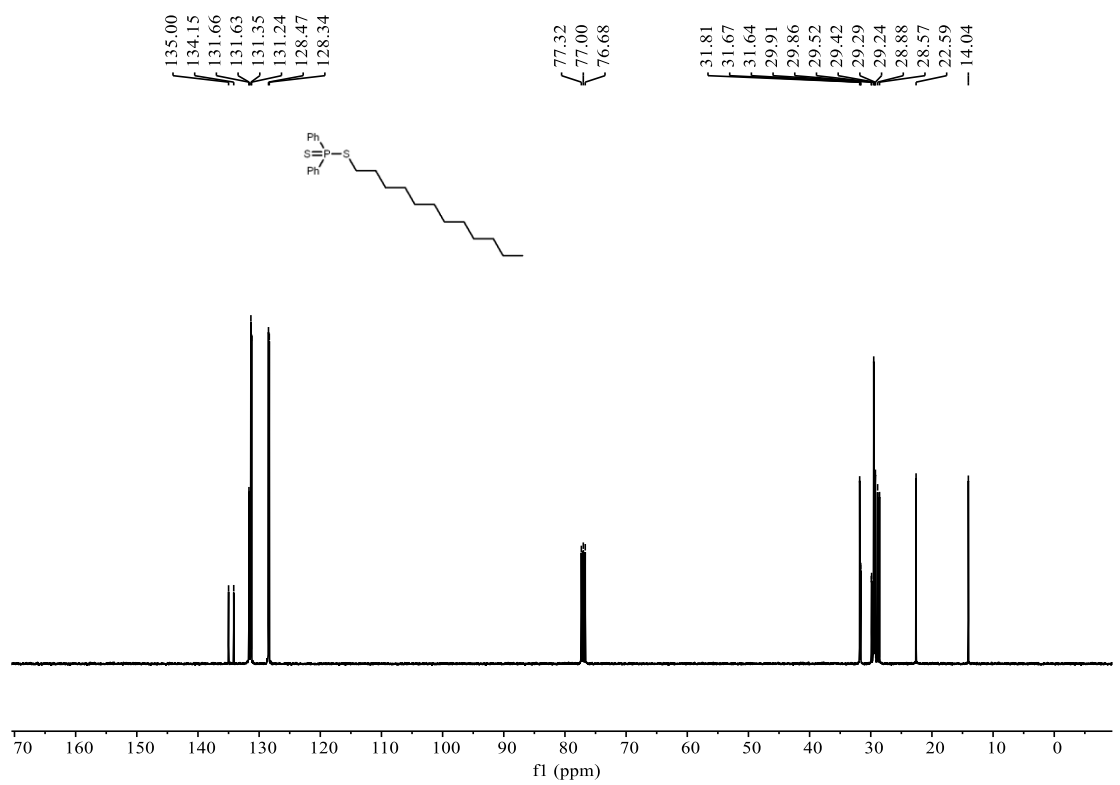

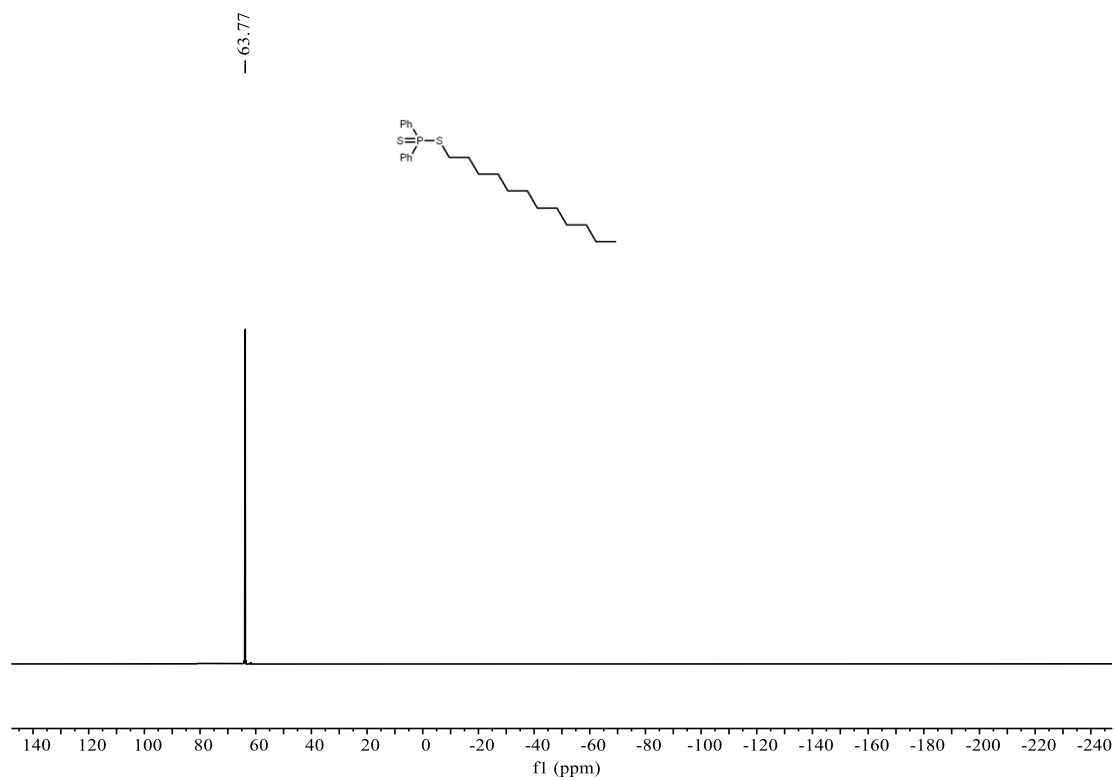

### Allyl diphenylphosphinodithioate (**4r**)

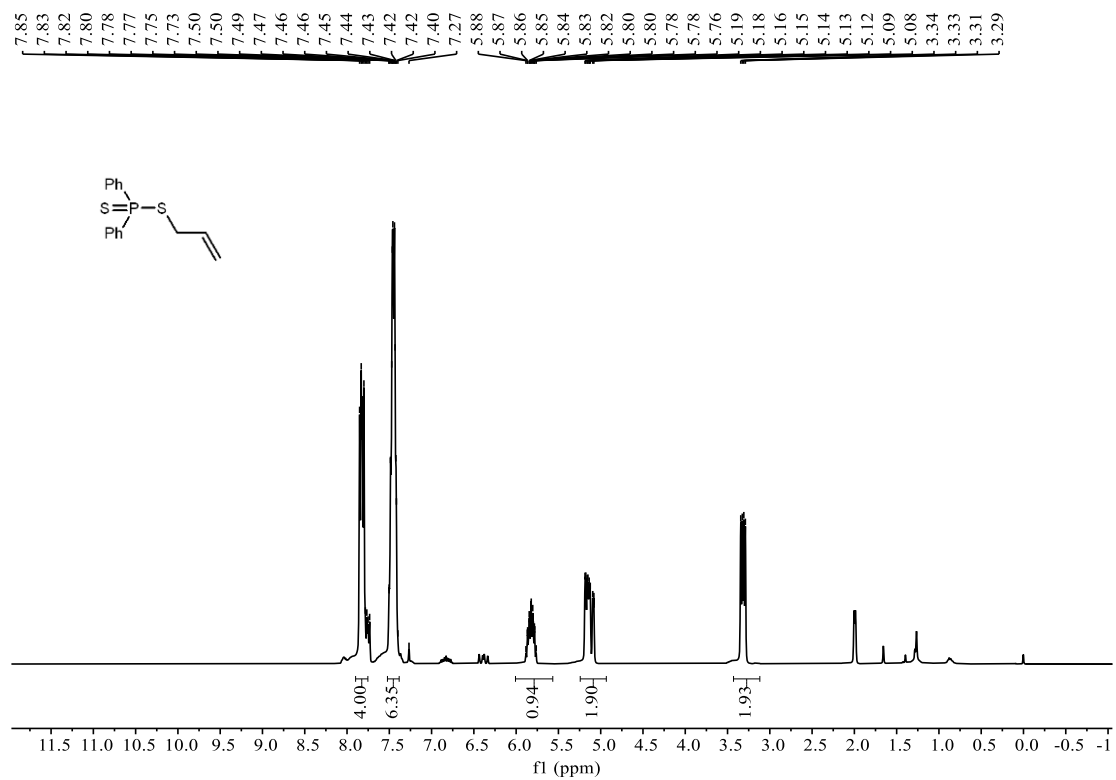

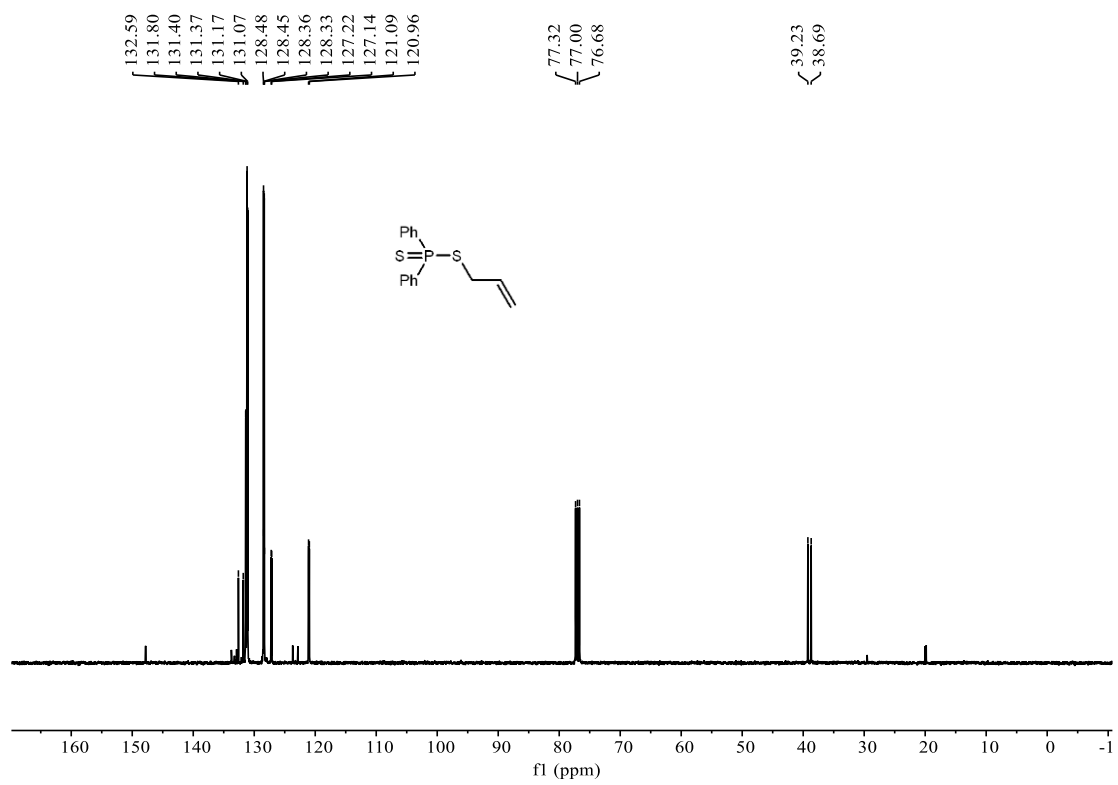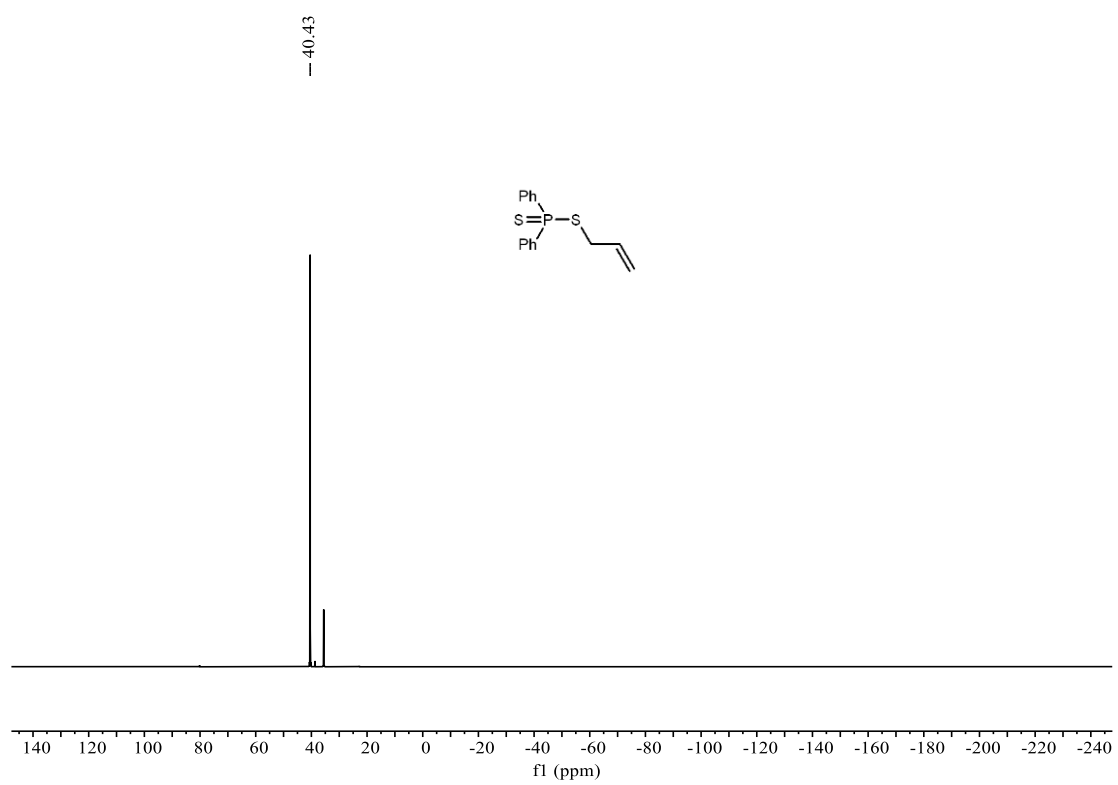

Benzyl diphenylphosphinodithioate (**4s'**)

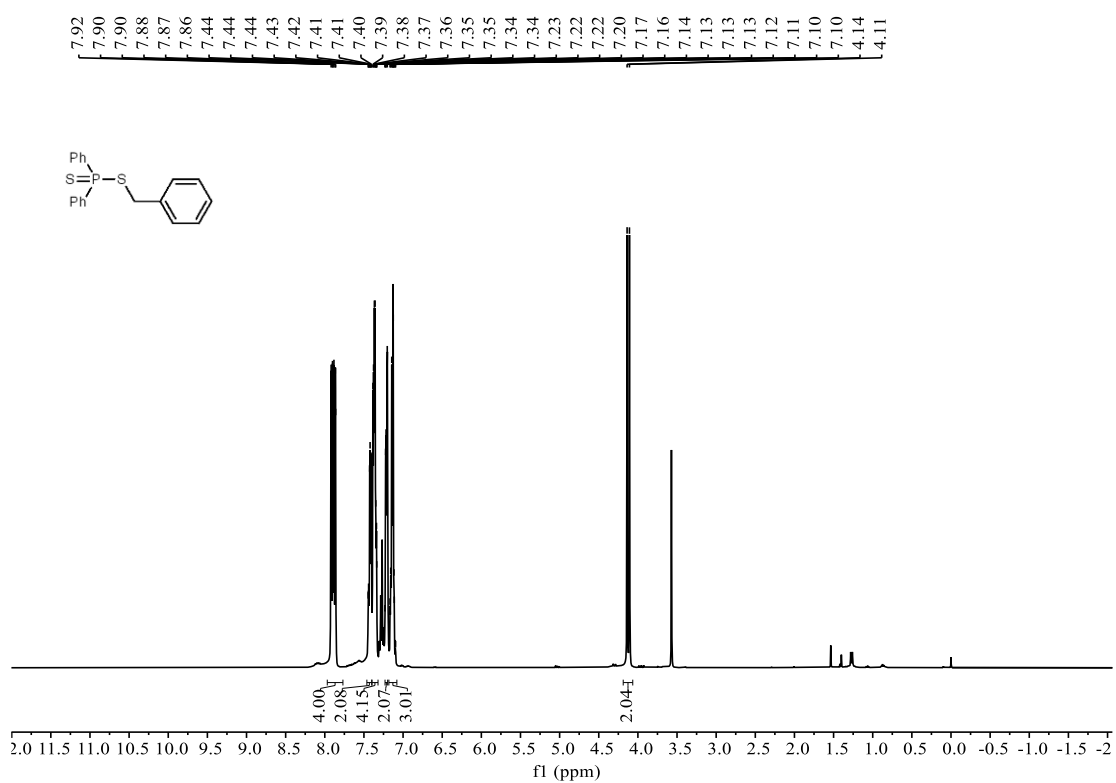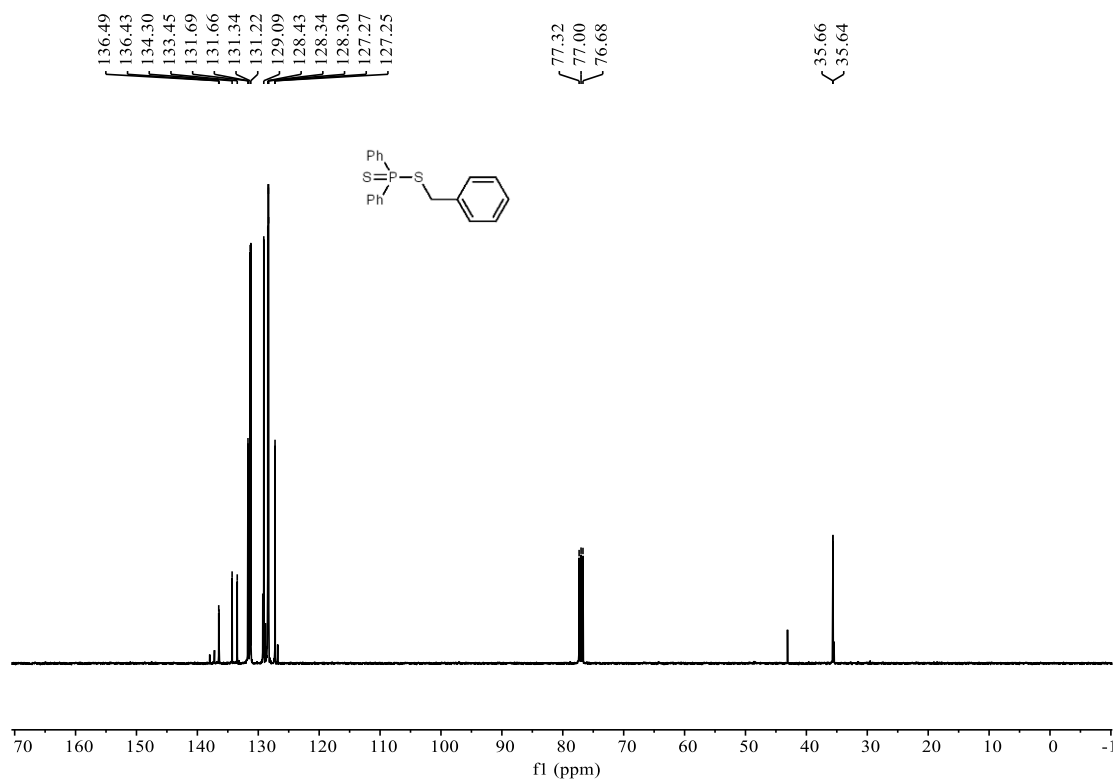

- 64.14

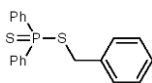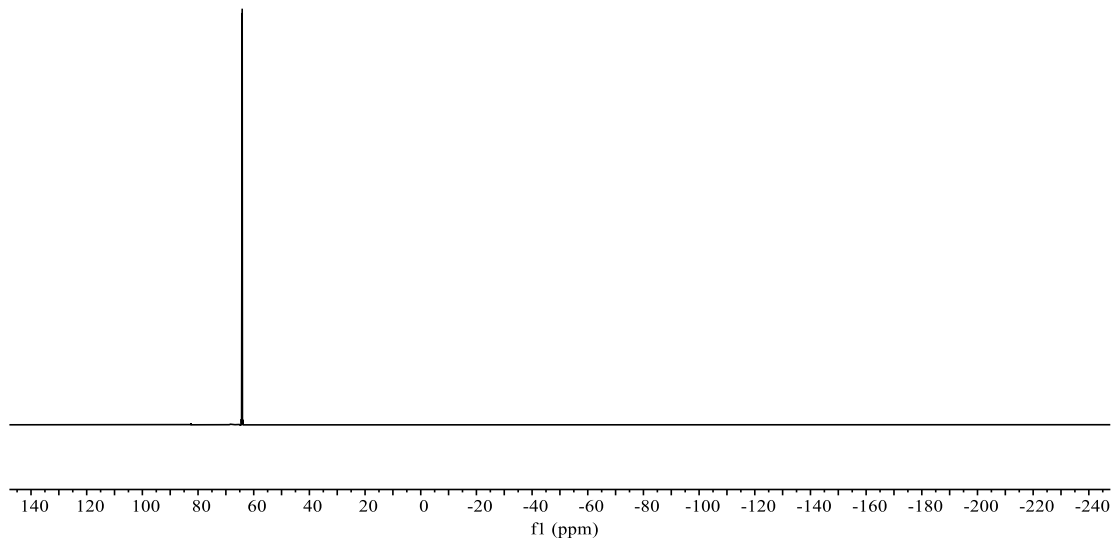

### Methyl 3-((diphenylphosphorothioyl)thio)propanoate (**4t'**)

7.55, 7.54, 7.54, 7.53, 7.53, 7.52, 7.51, 7.51, 7.50, 7.49, 7.49, 7.48, 7.48, 7.47, 7.47, 7.46, 7.38, 7.38, 7.37, 7.37, 7.36, 7.36, 7.35, 7.35, 7.34, 7.34, 7.34, 7.33, 7.33, 7.32, 7.31, 7.26, 7.25, 3.63, 3.08, 3.06, 3.05, 3.03, 3.02, 3.01, 3.00, 2.98, 2.72, 2.70, 2.69

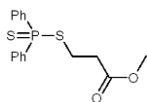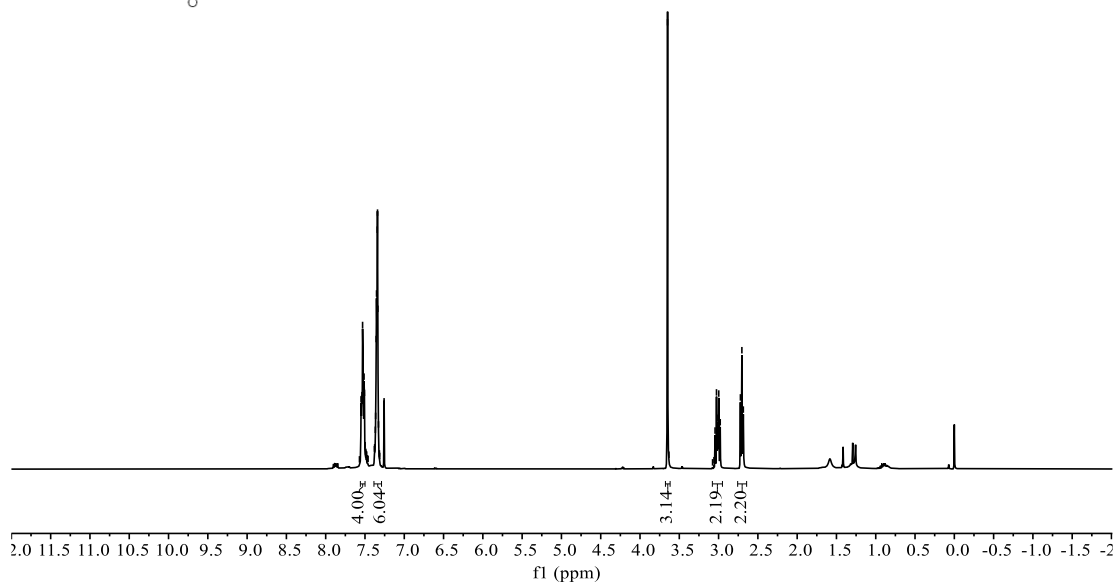

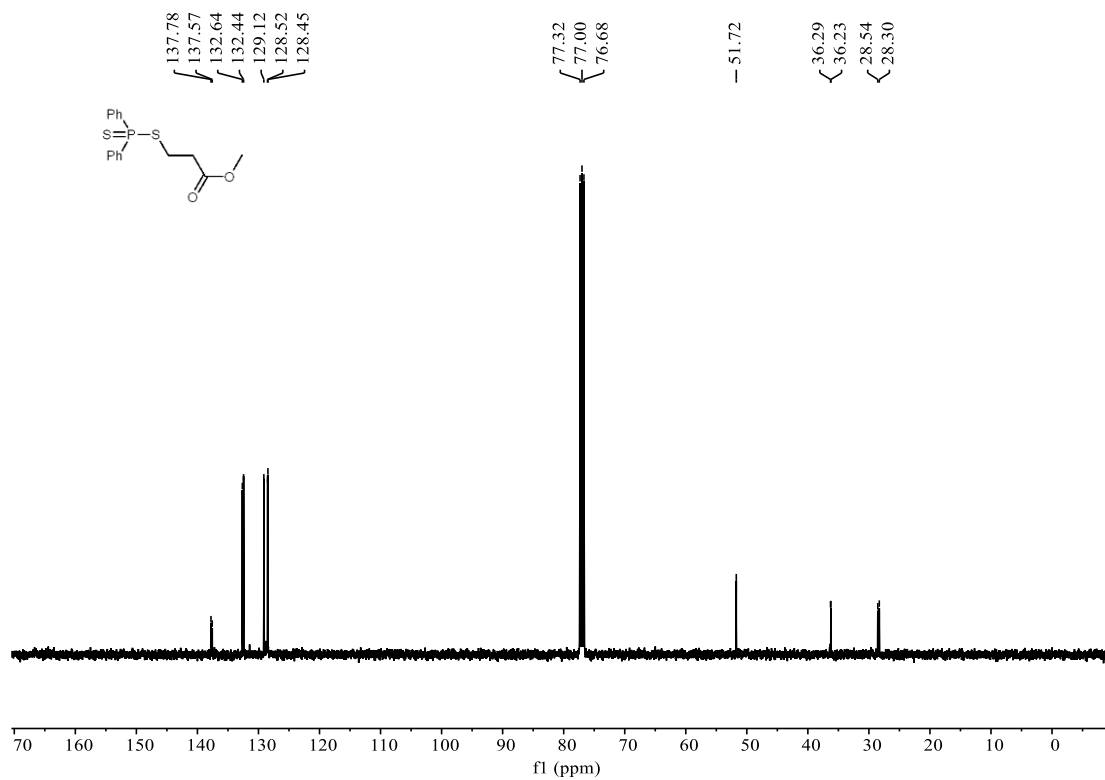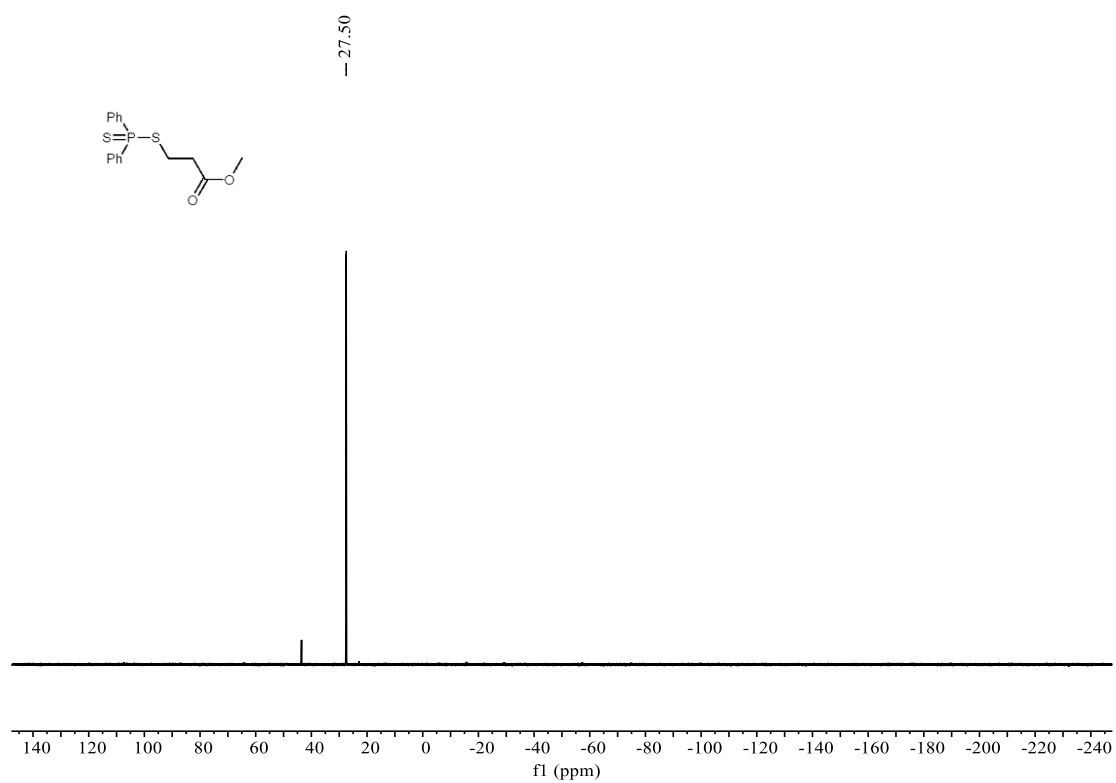

Methyl N-(tert-butoxycarbonyl)-S-(diphenylphosphorothioyl)cysteinate (**4u'**)

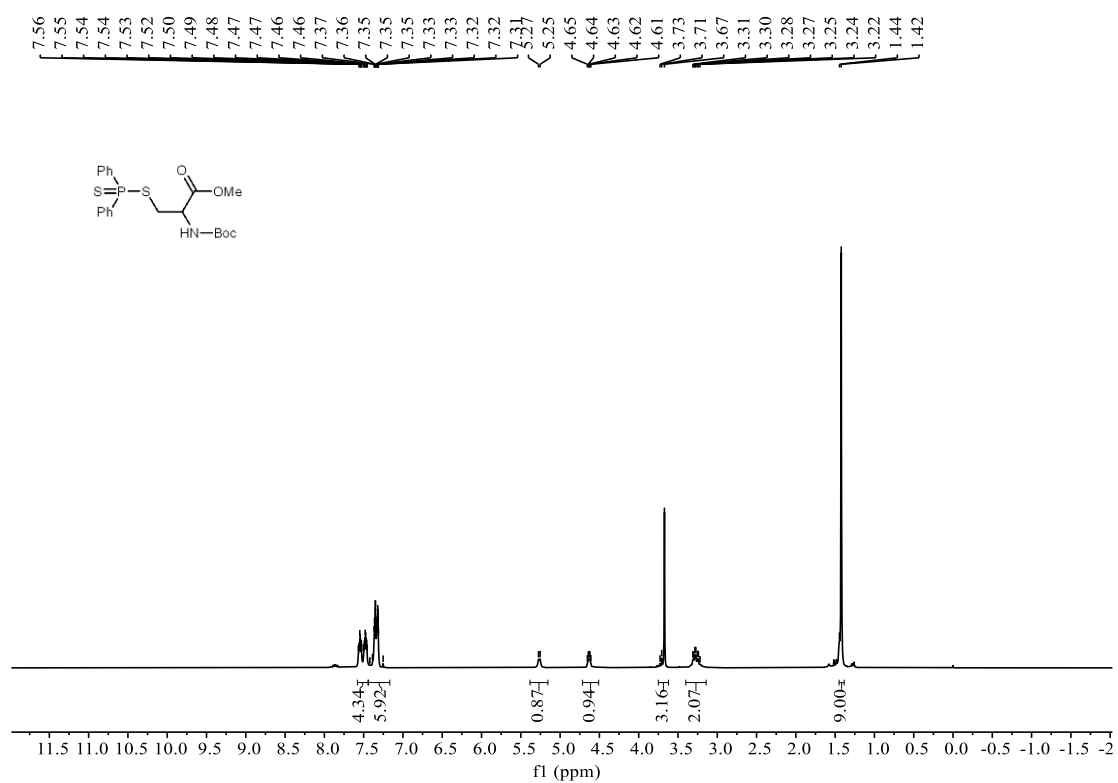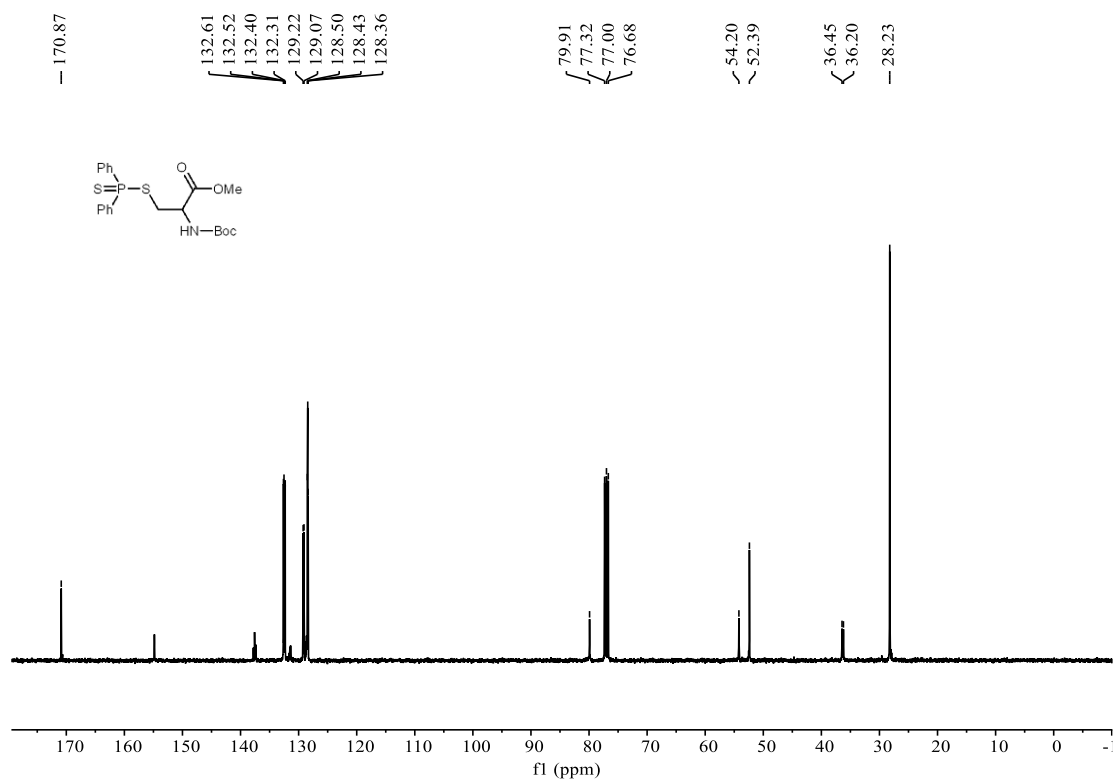

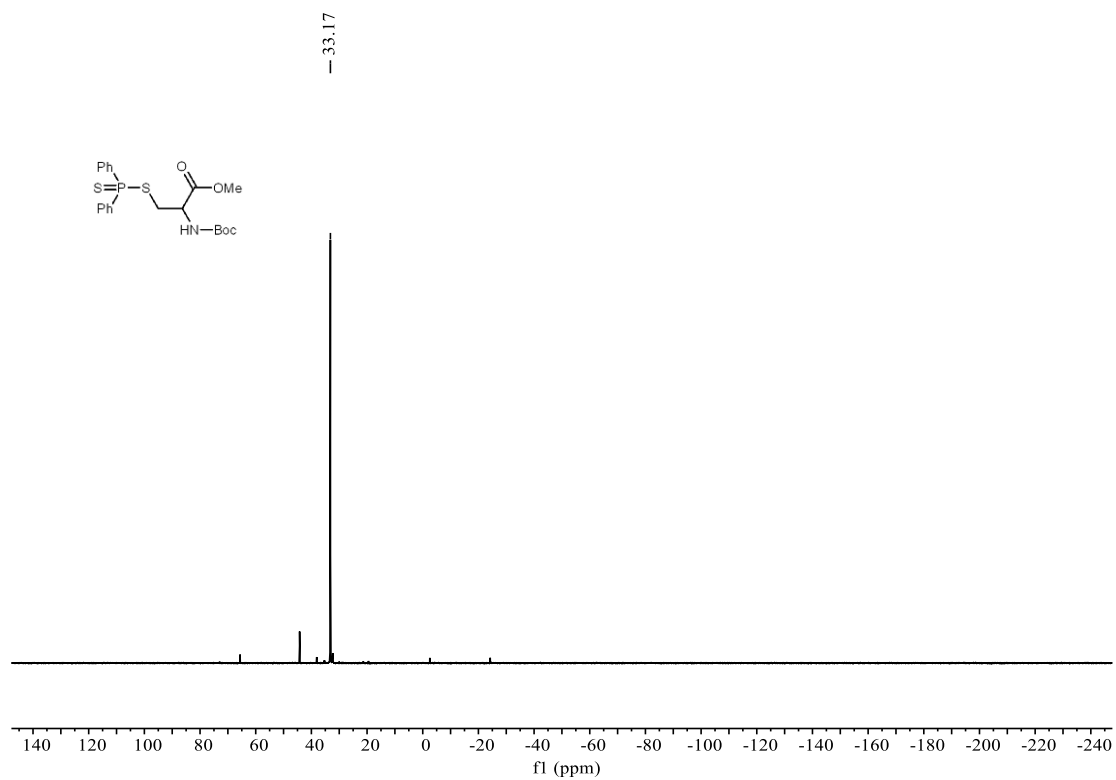

**Isopropyl diphenylphosphinodithioate (4v')**

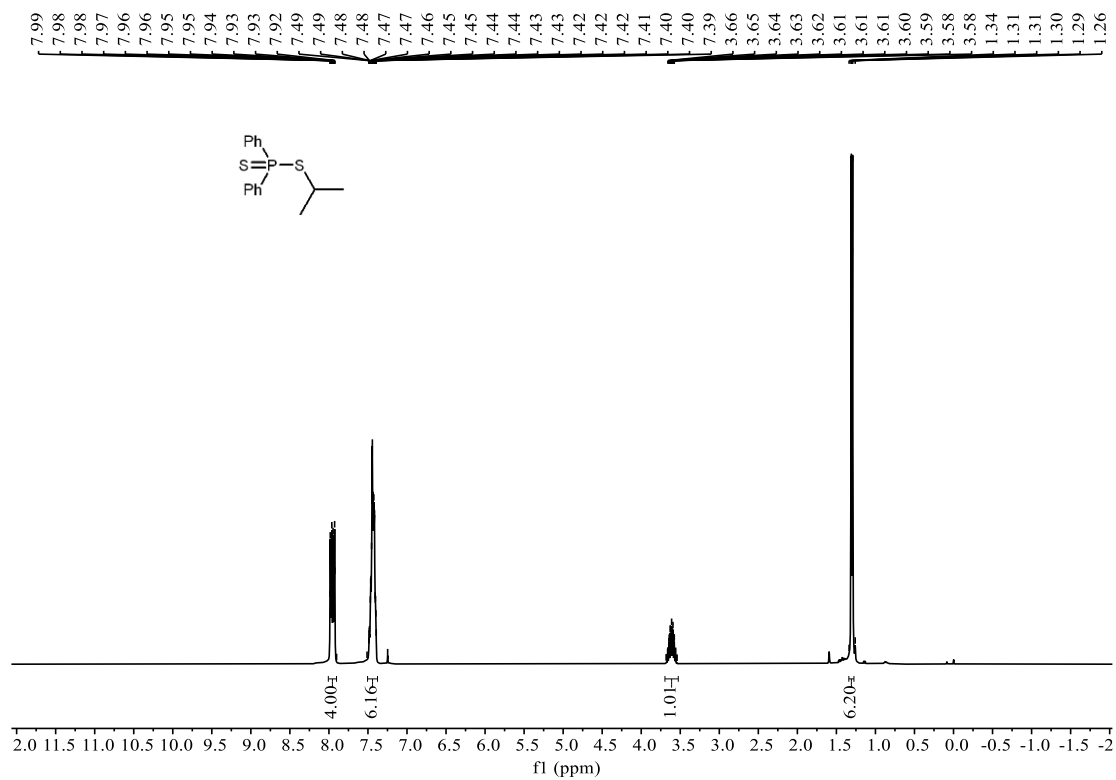

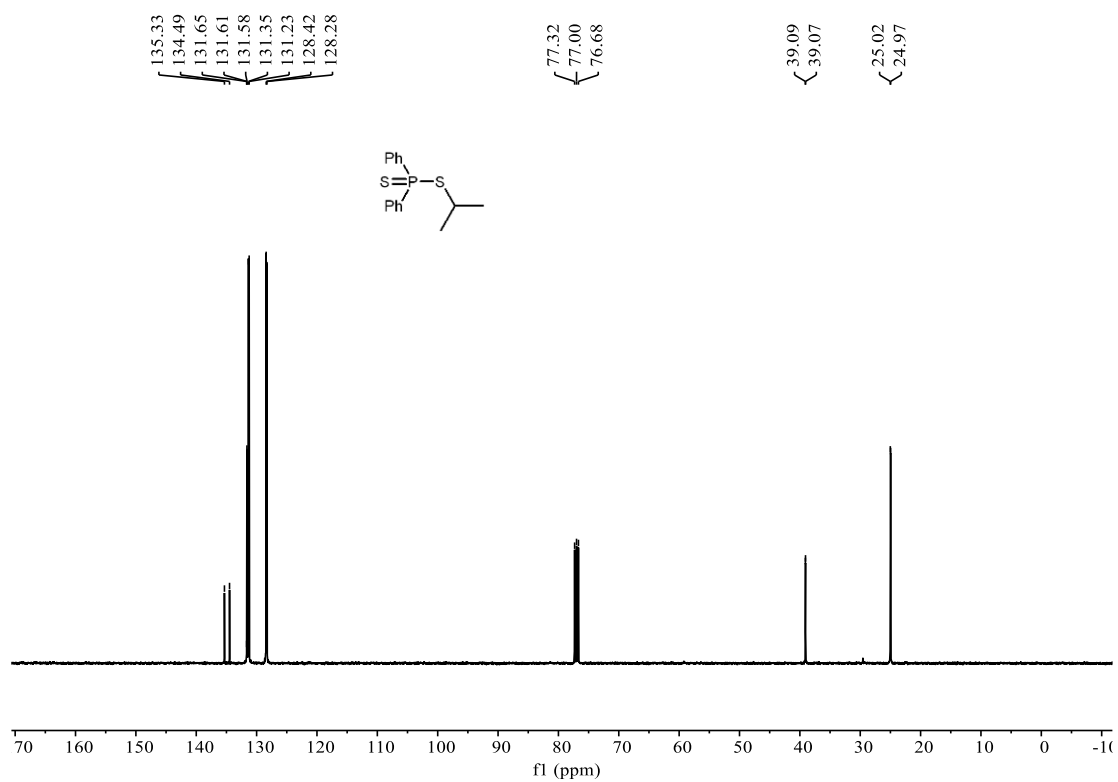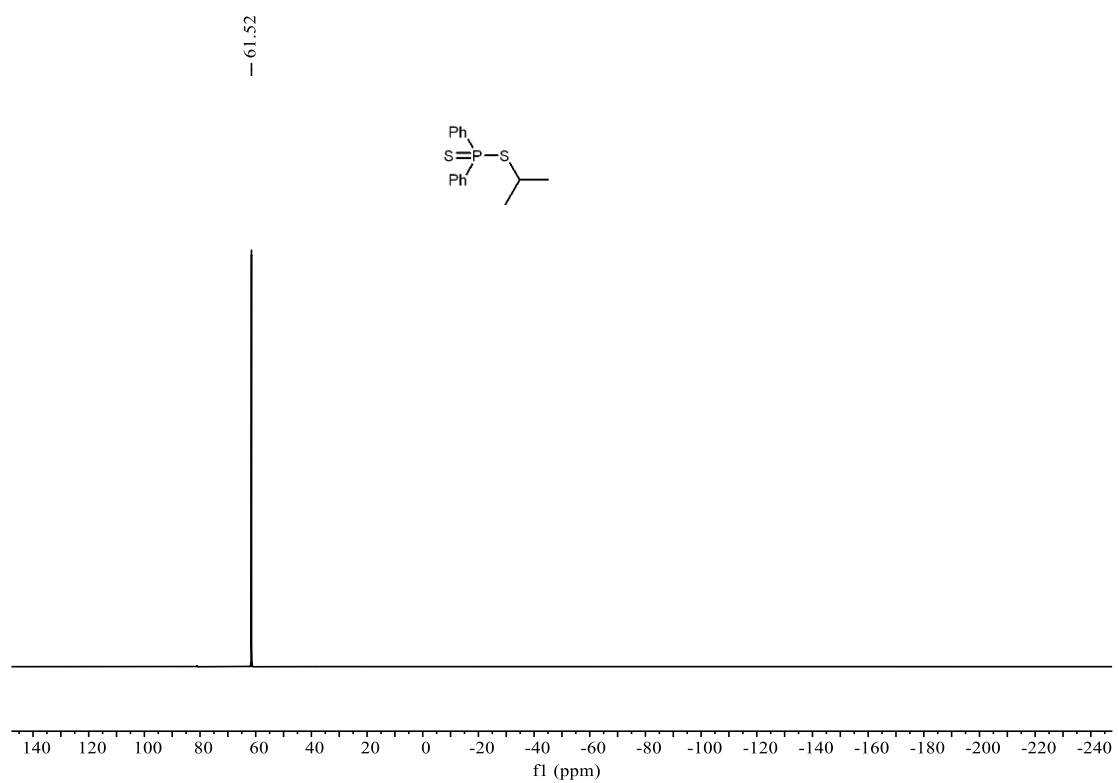

Cyclohexyl diphenylphosphinodithioate (**4w'**)

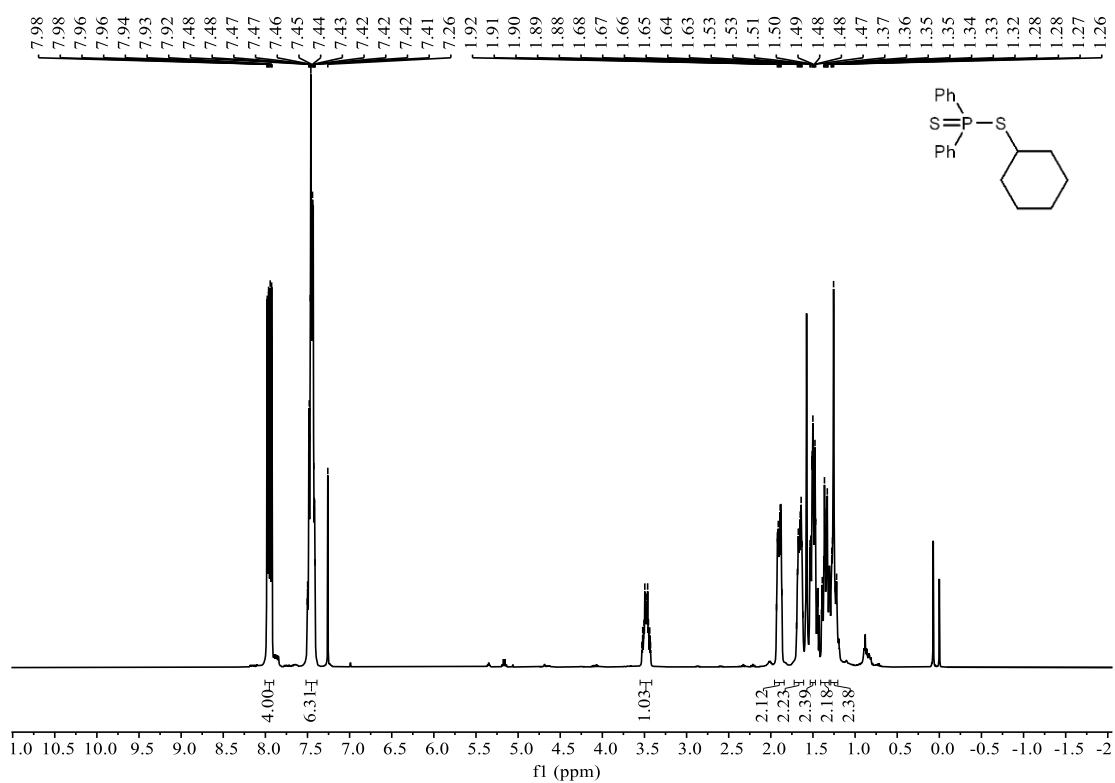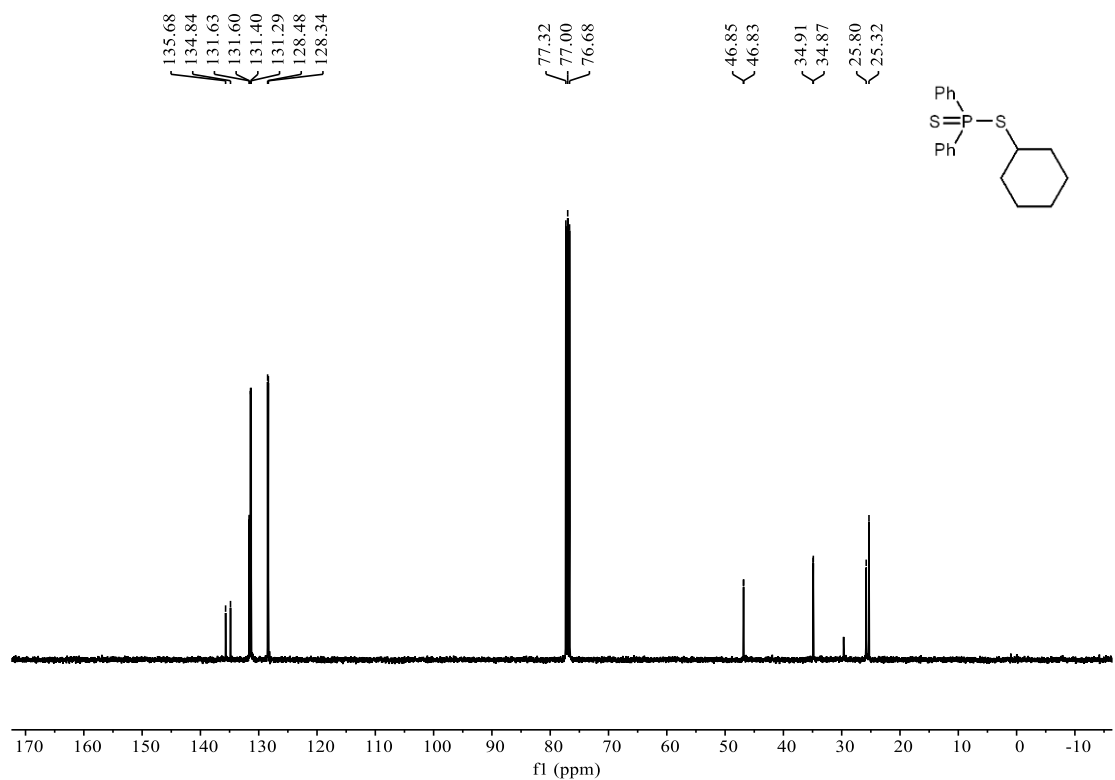

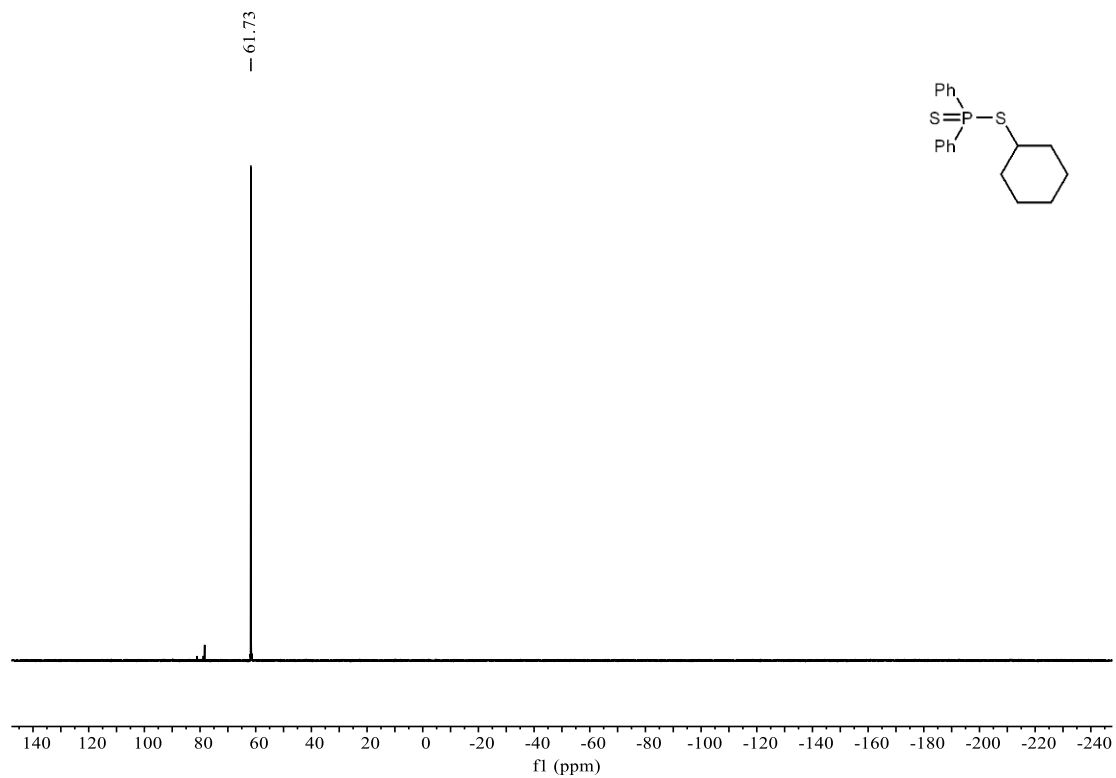

Ethane-1,2-diyl bis(diphenylphosphinodithioate) (**4x'**)

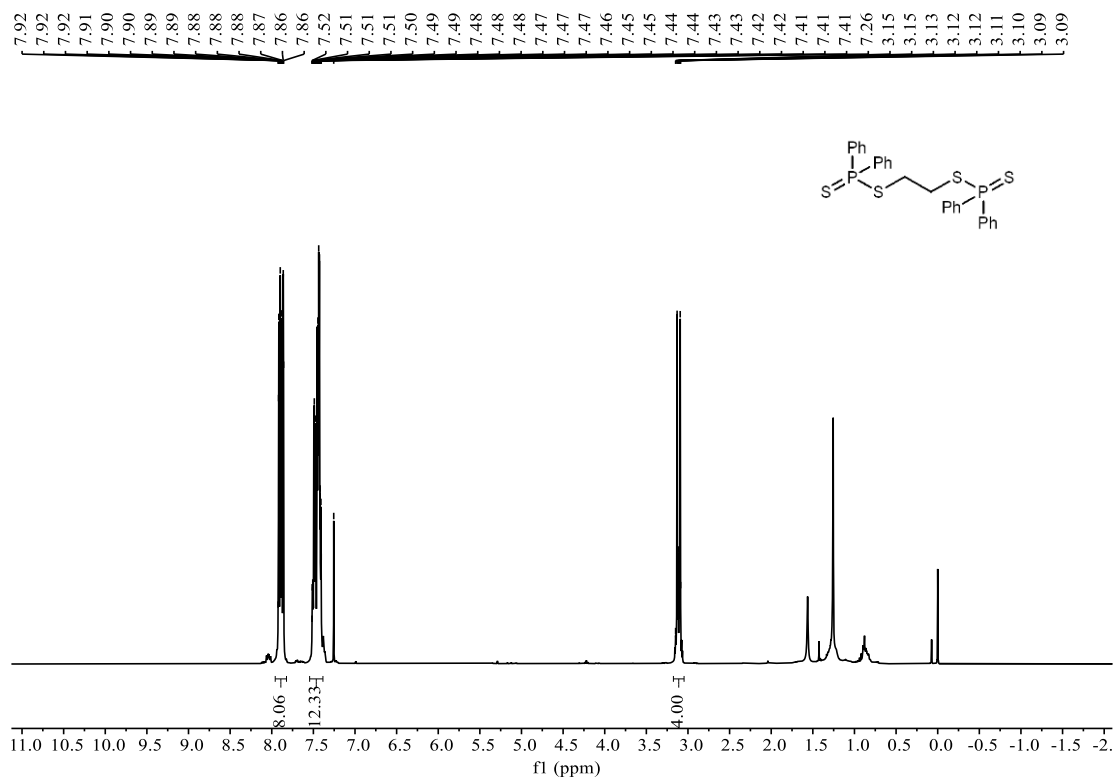

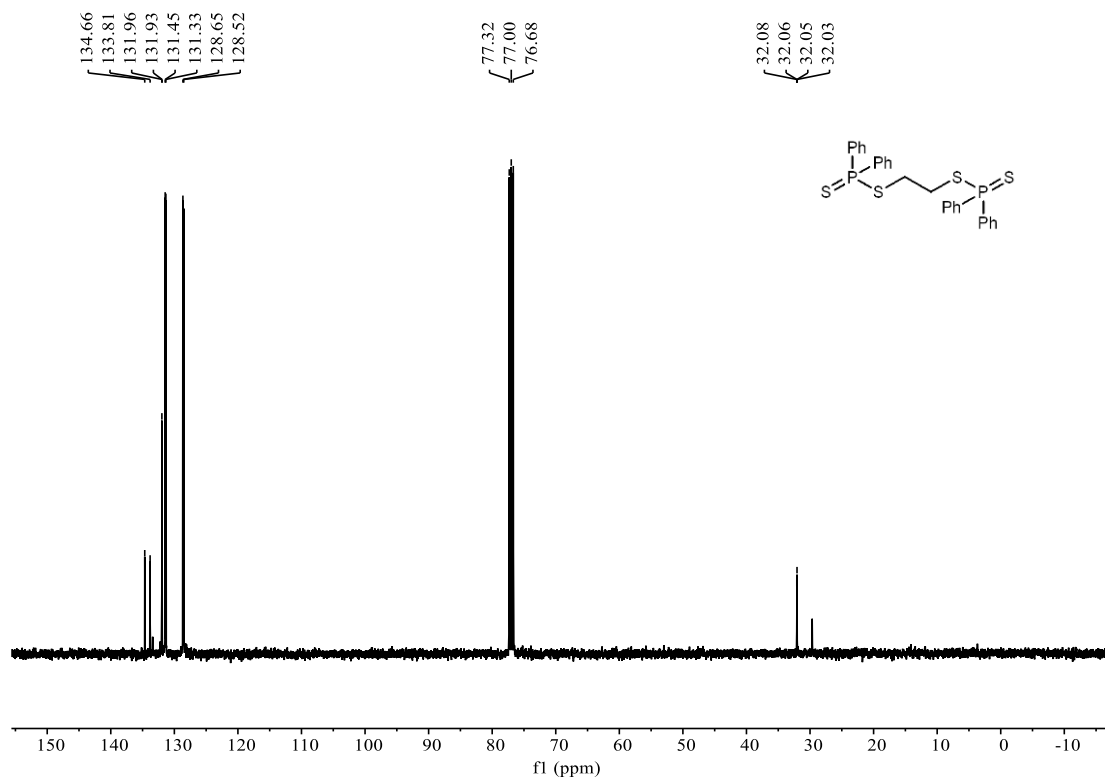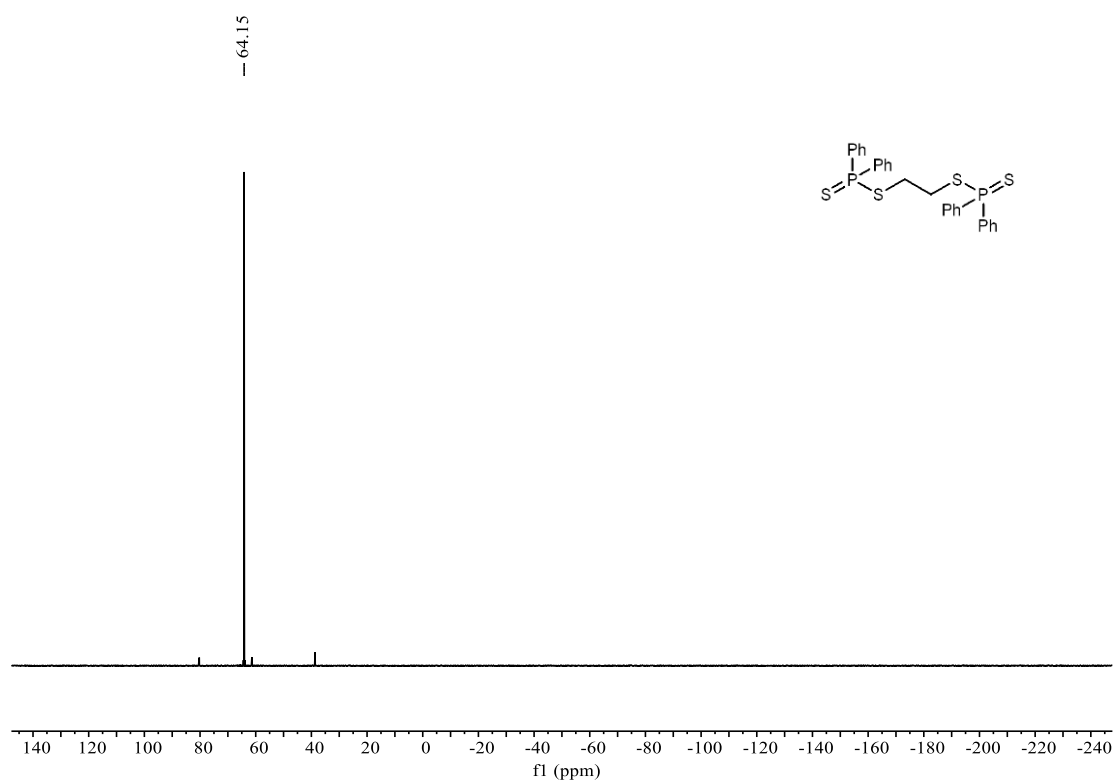

# Propane-1,3-diyl bis(diphenylphosphinodithioate) (**4y'**)

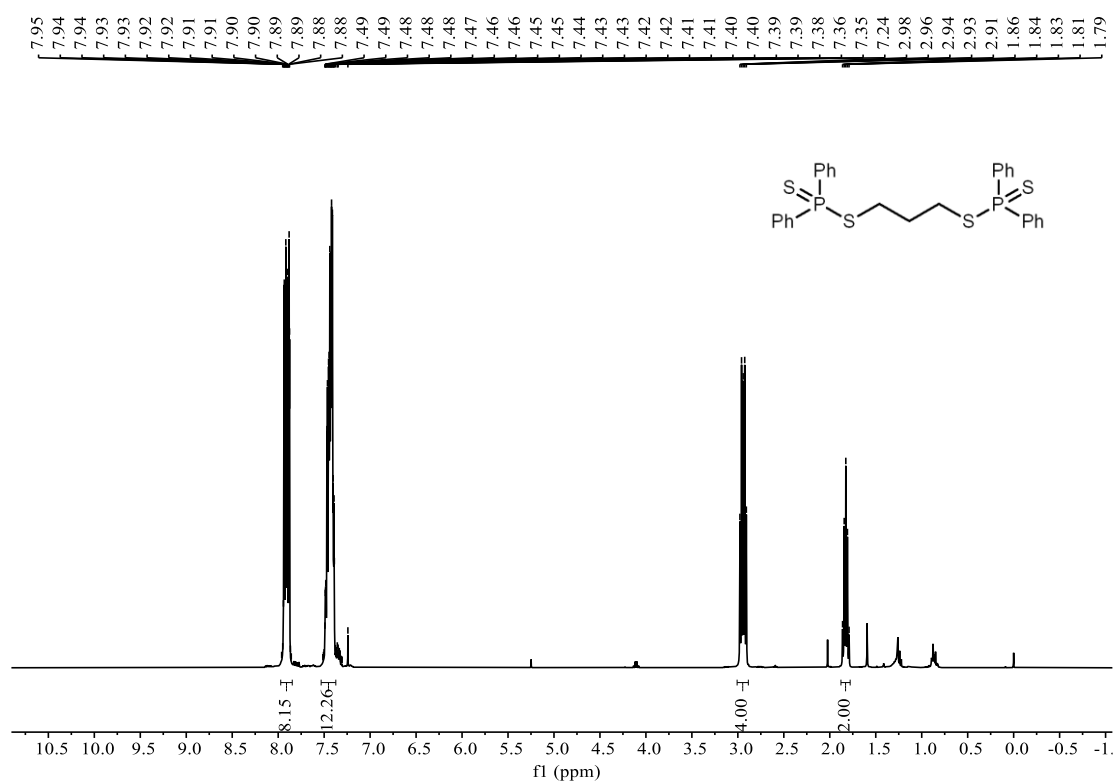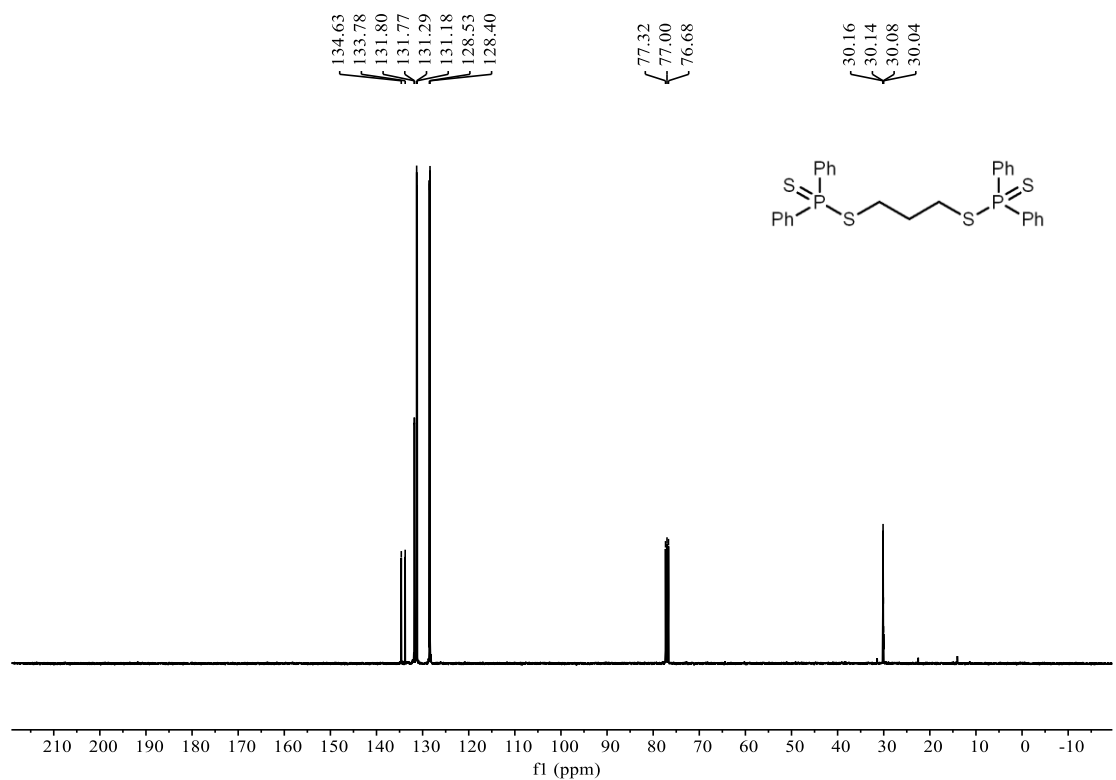



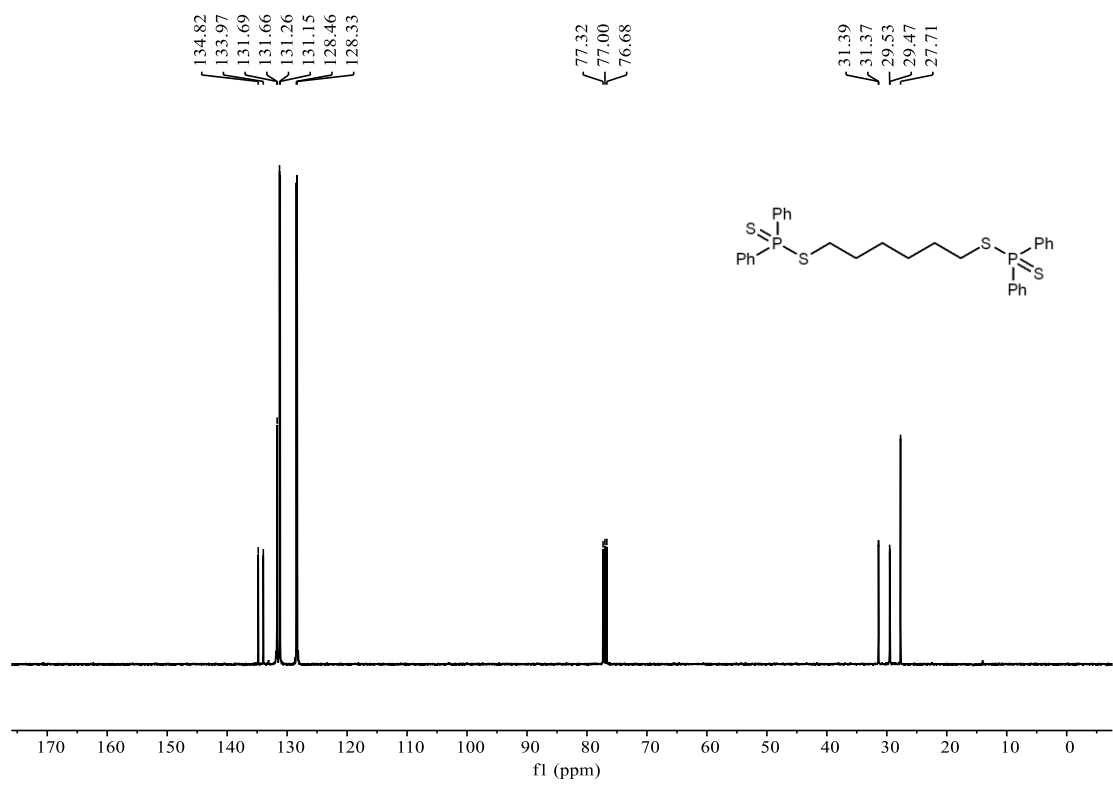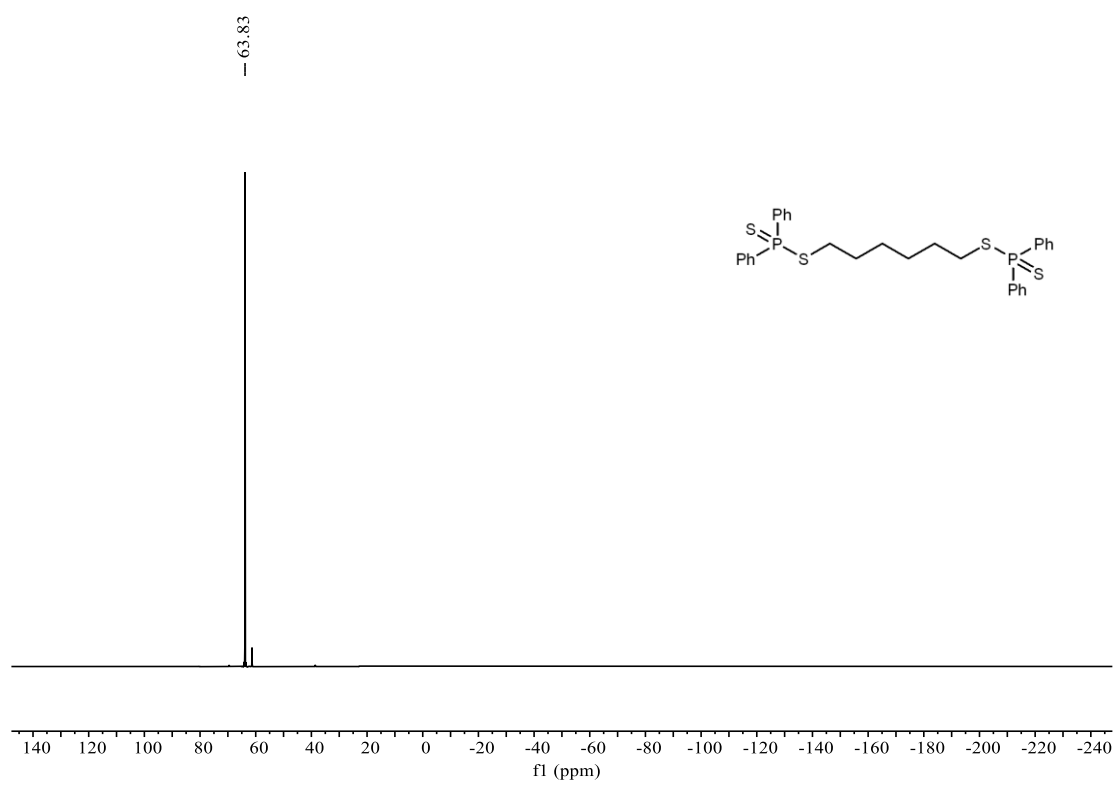



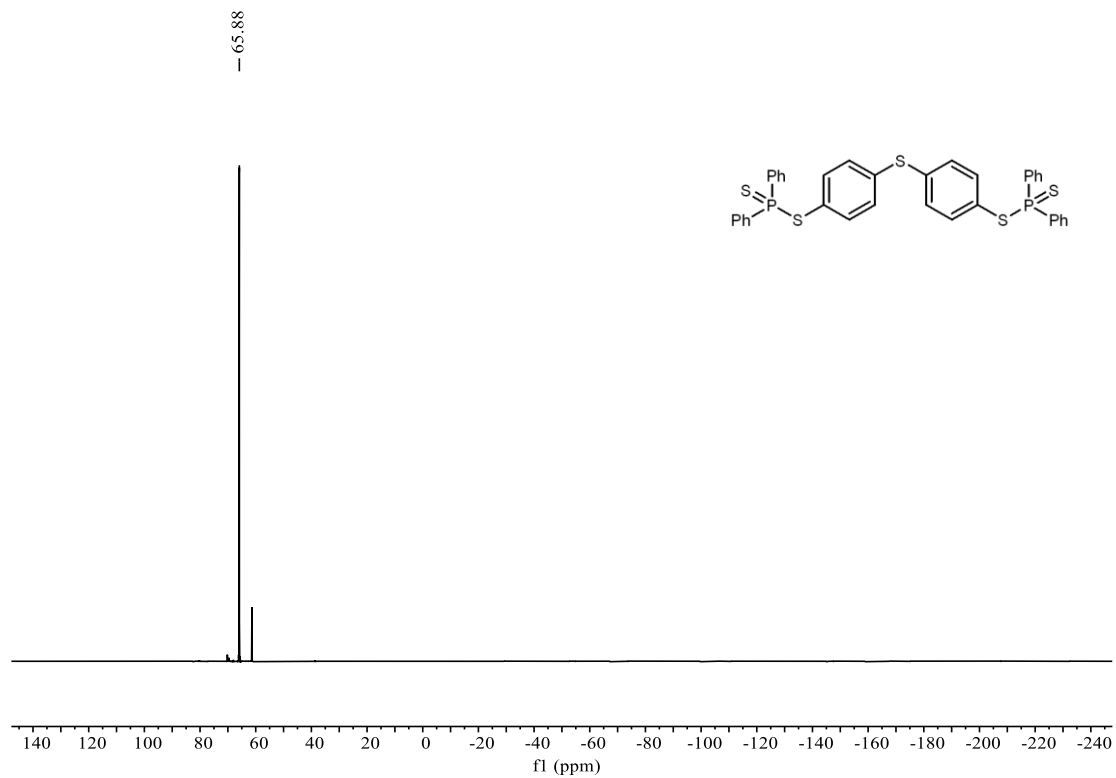

*N,P,P*-triphenylphosphinothioic amide (**4ab'**)

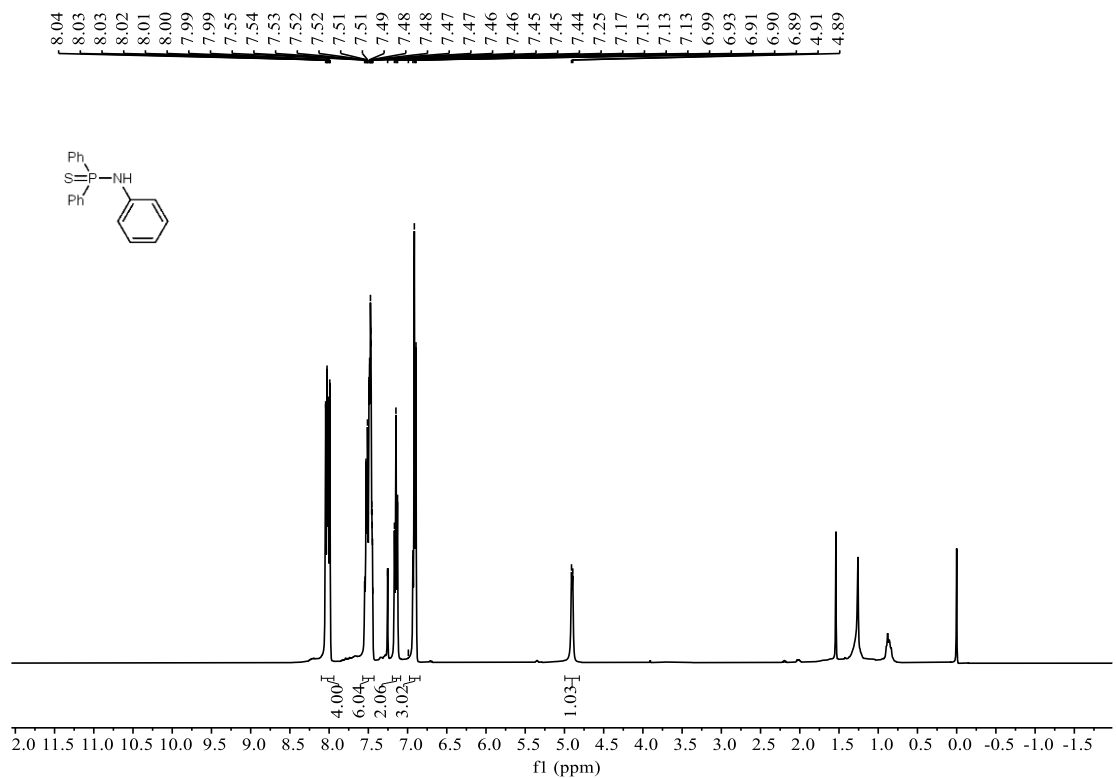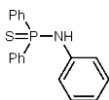

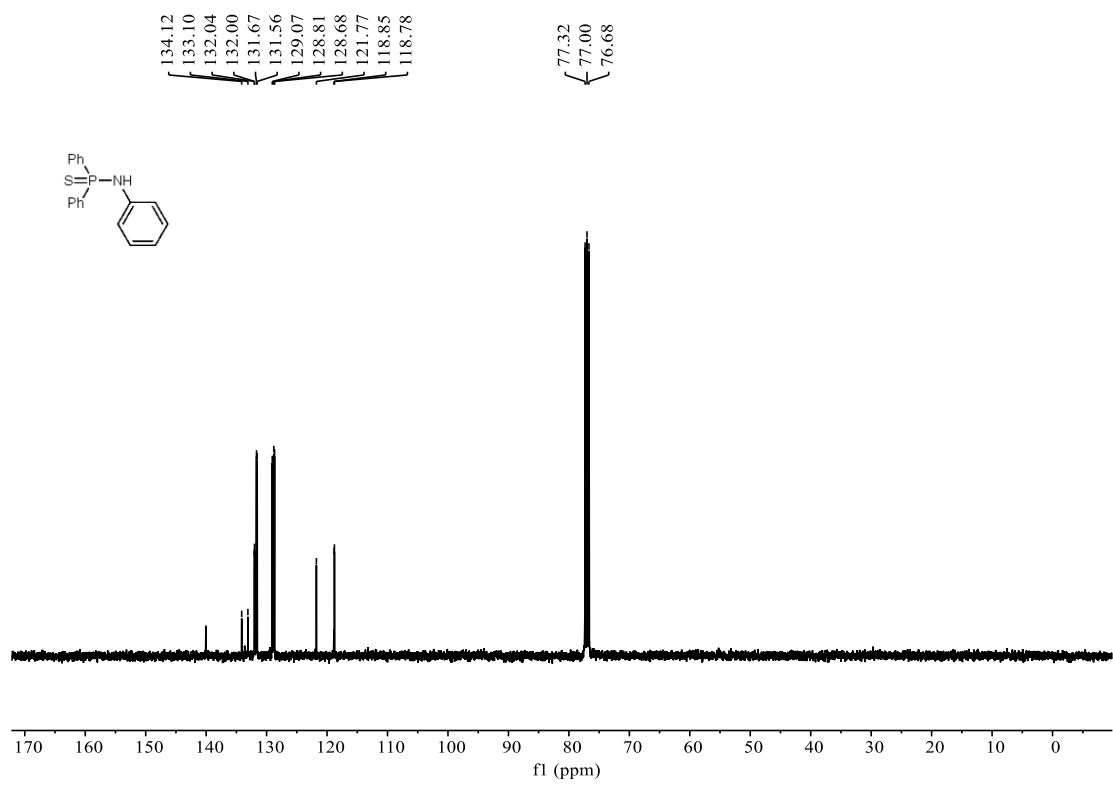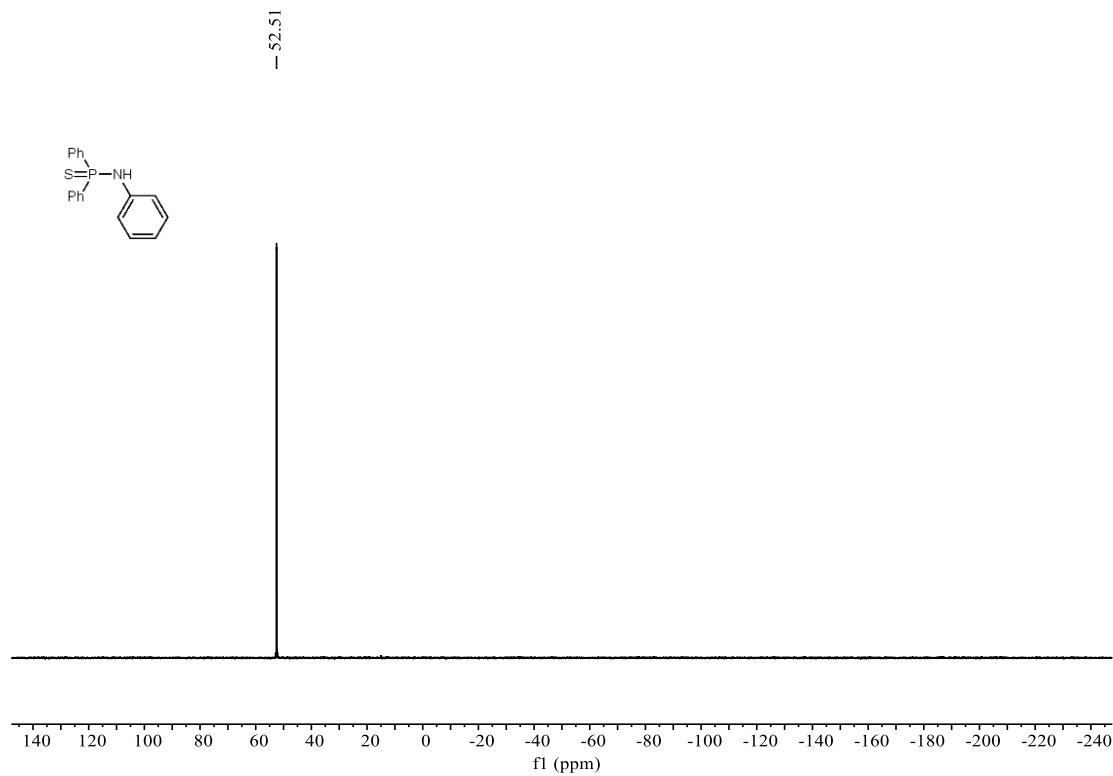

N-(4-(tert-butyl)phenyl)-P,P-diphenylphosphinothioic amide (**4ac'**)

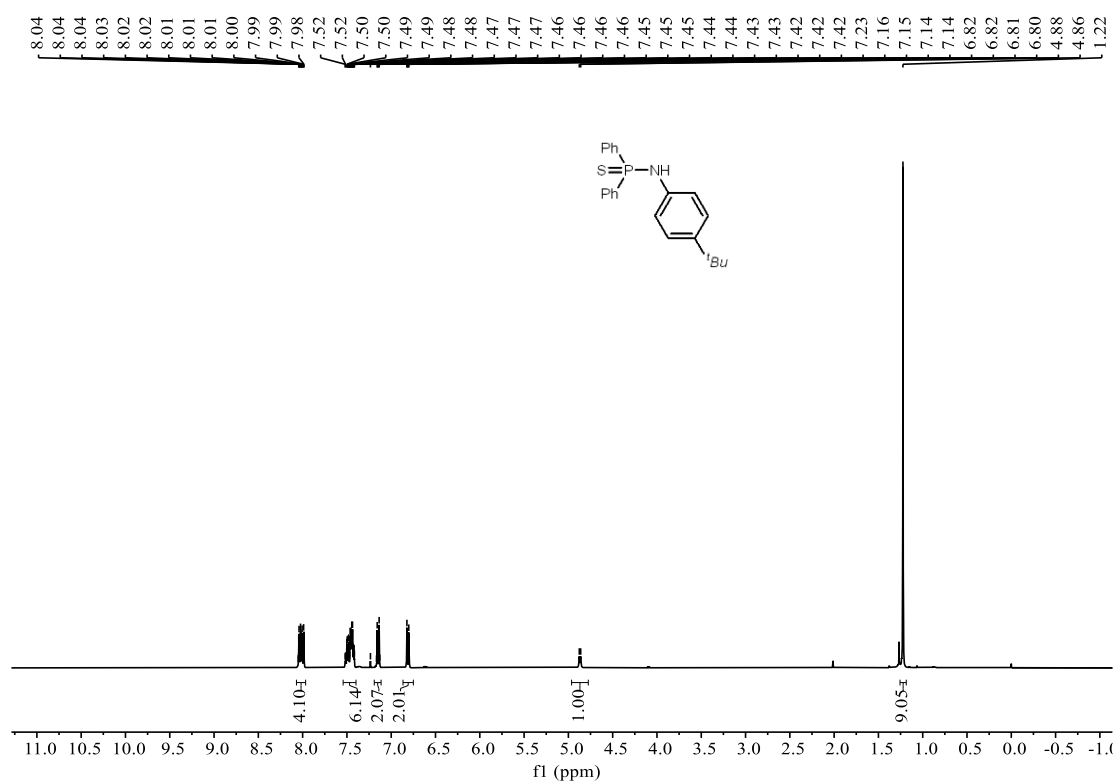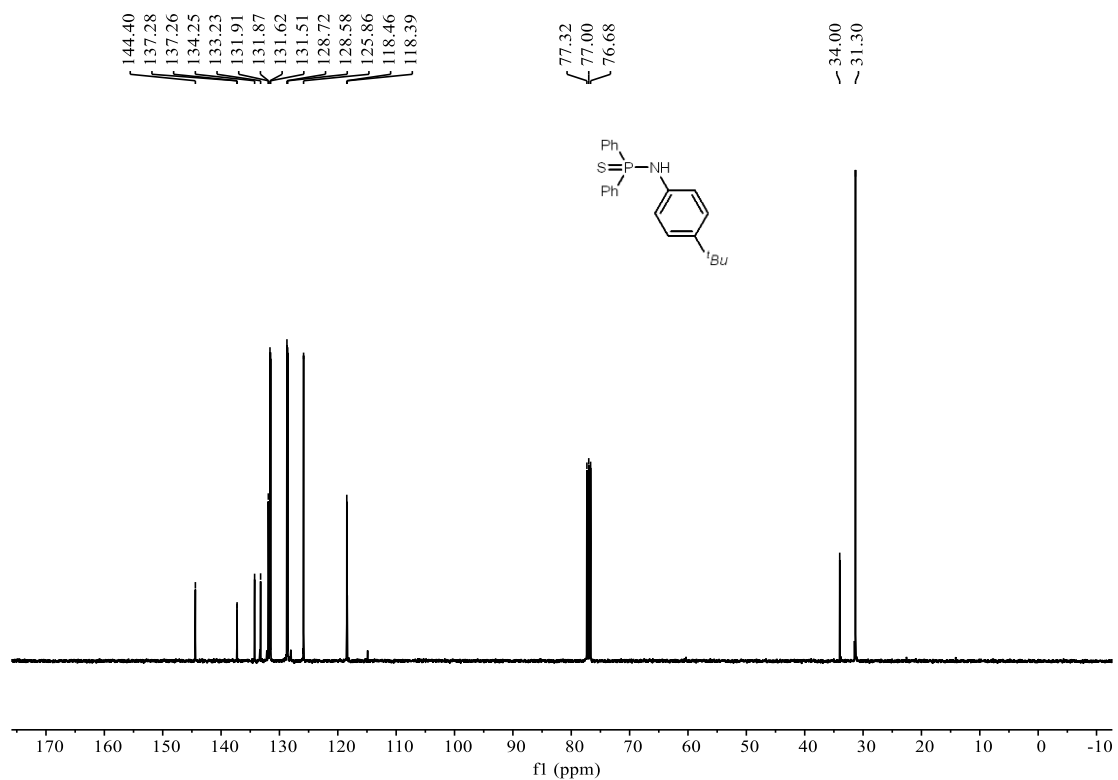

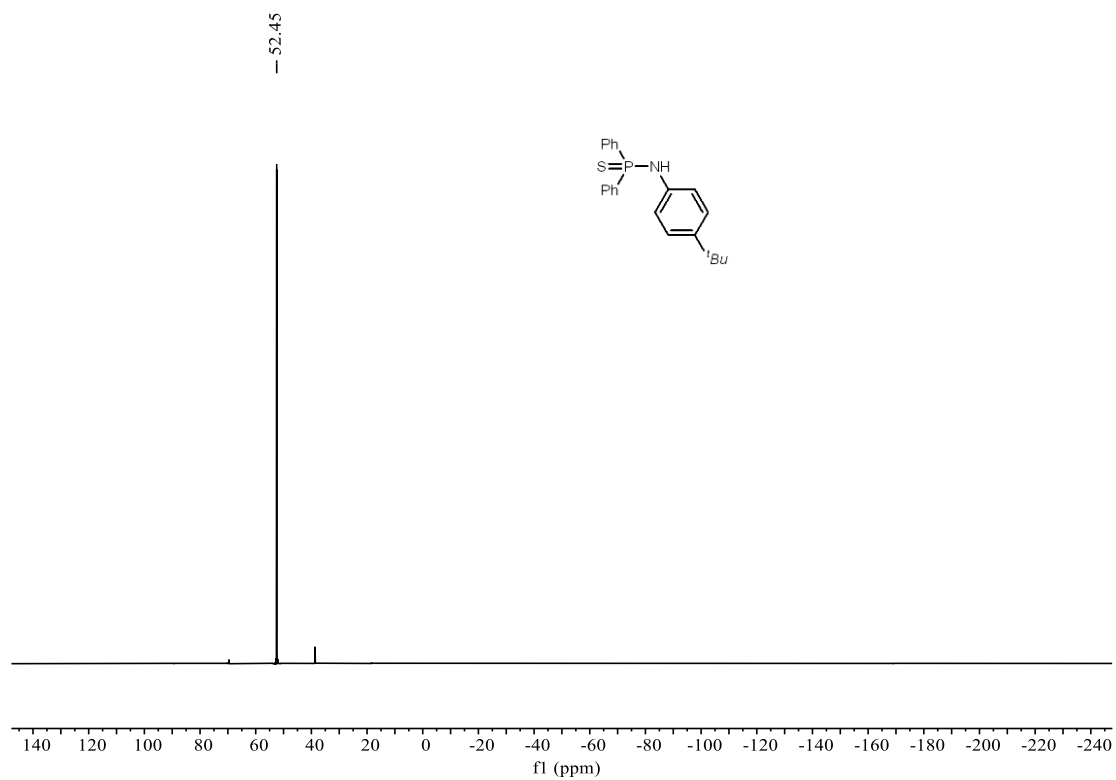

N-(4-cyanophenyl)-P,P-diphenylphosphinothioic amide (**4ad'**)

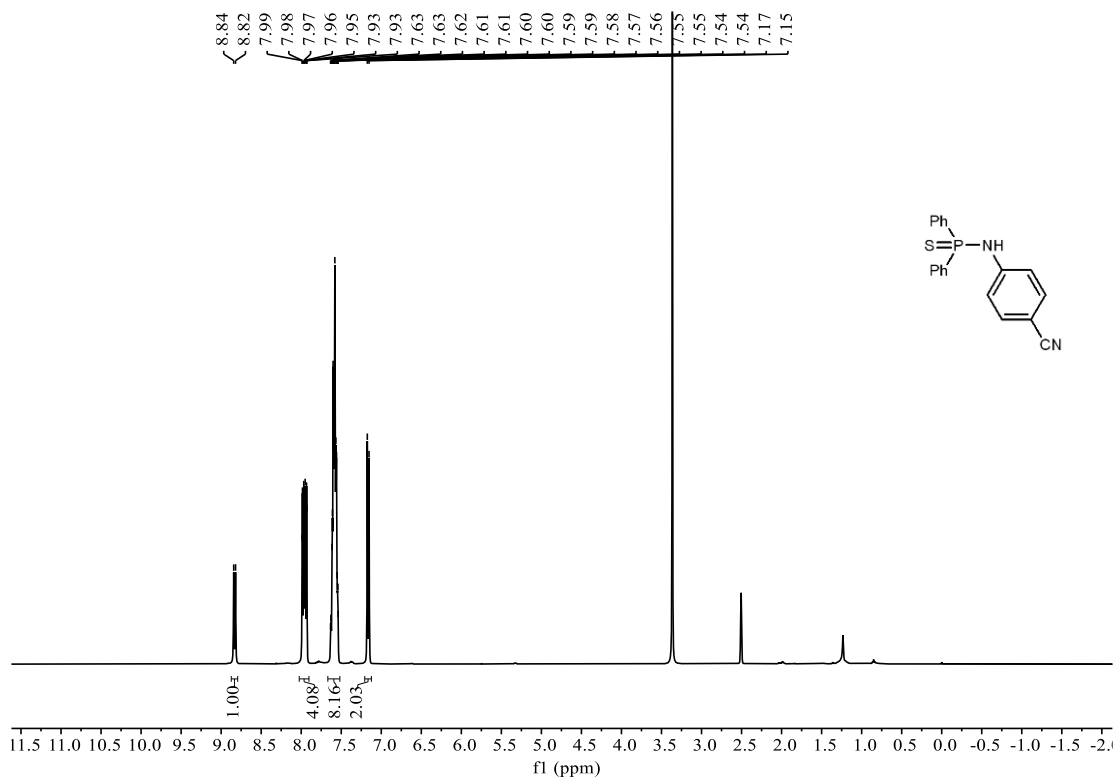

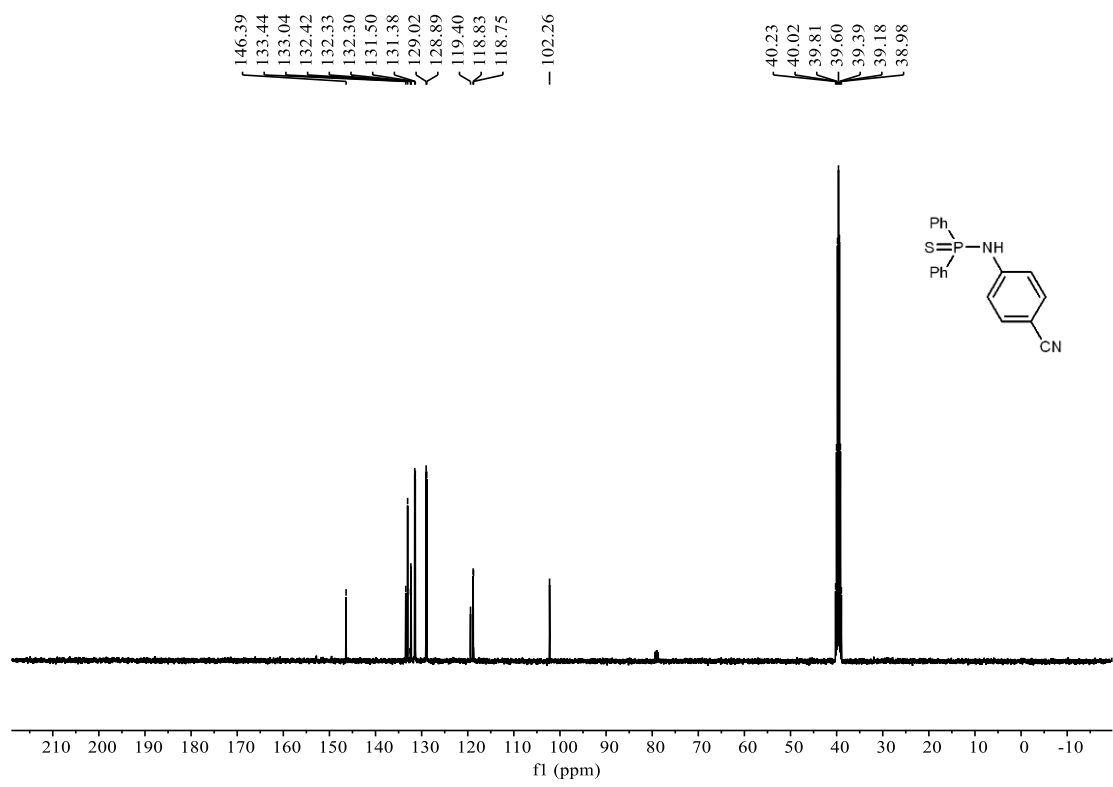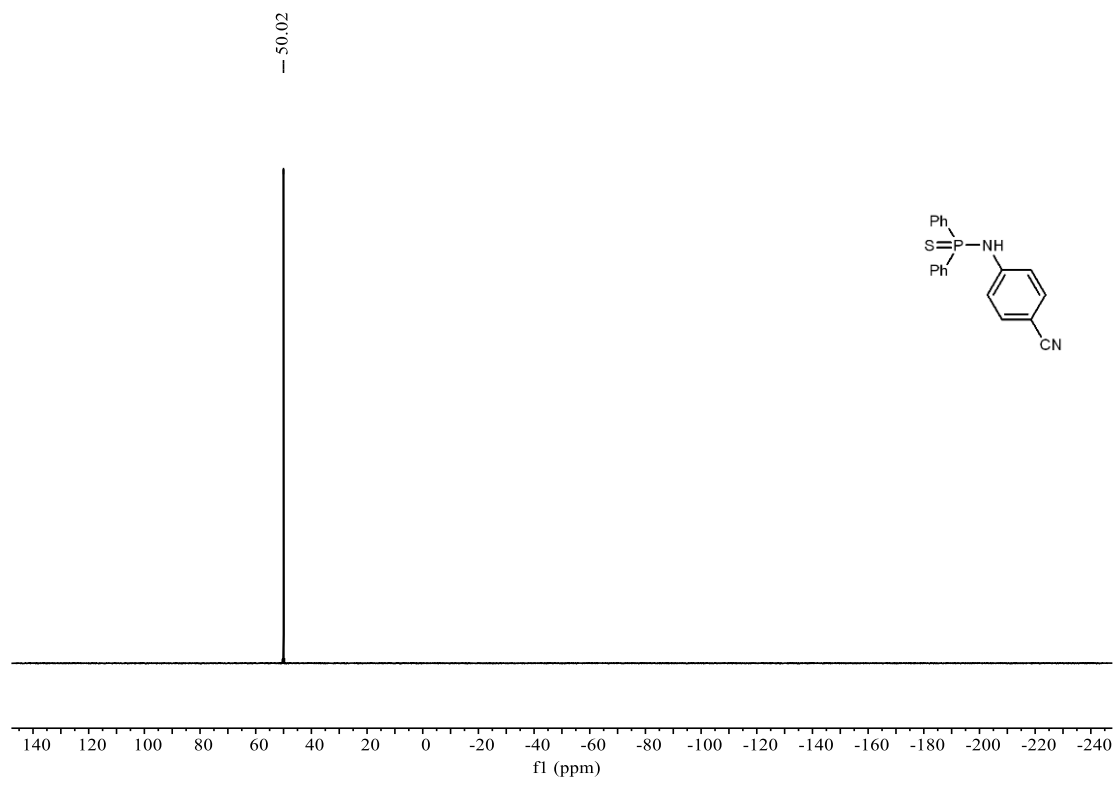

P,P-diphenyl-N-(4-(trifluoromethyl)phenyl)phosphinothioic amide (**4ae'**)

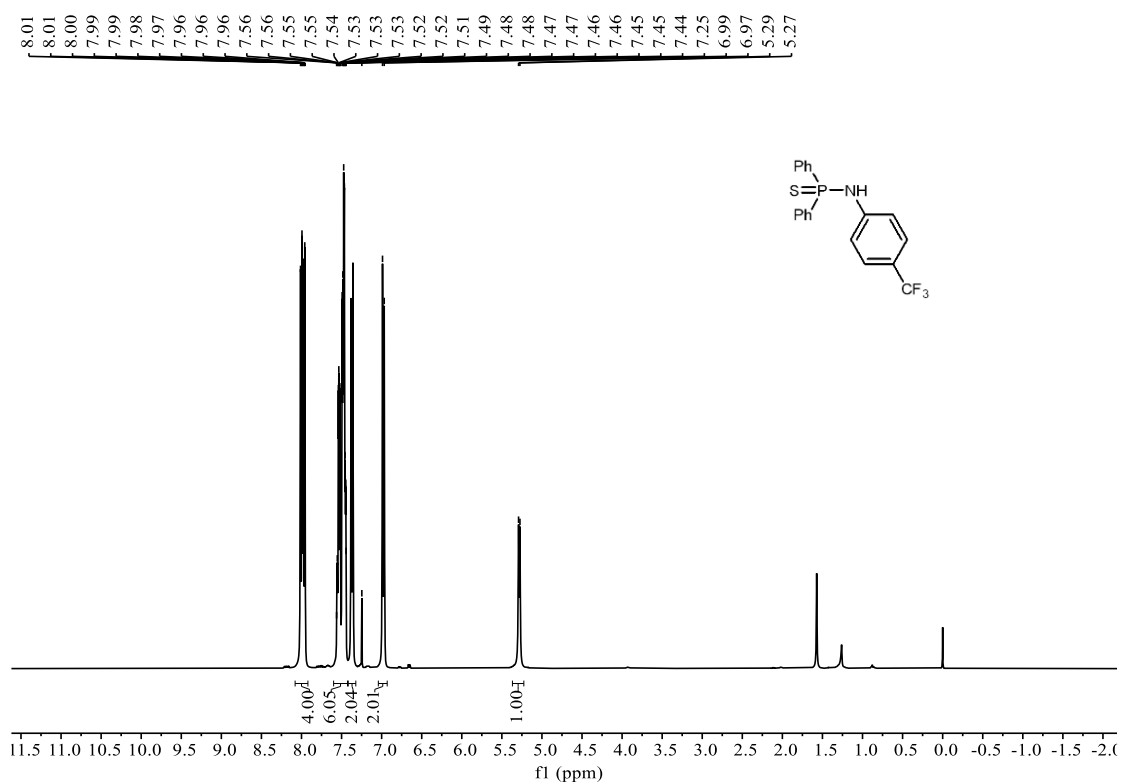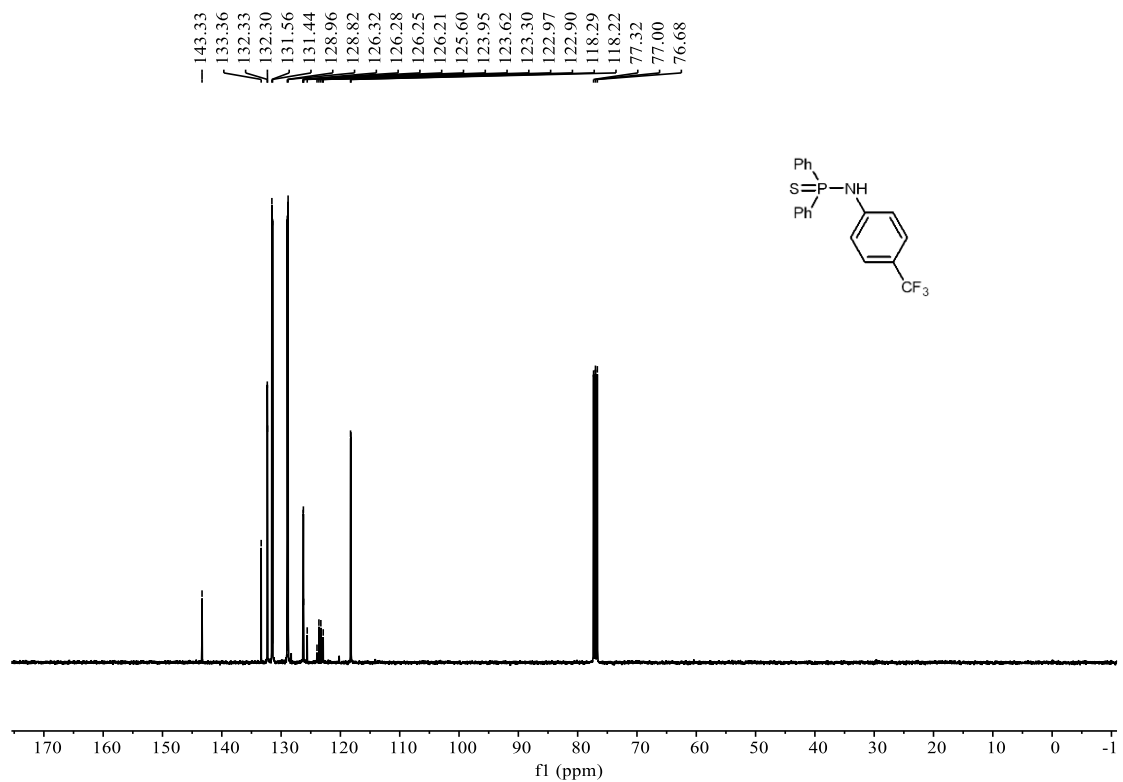

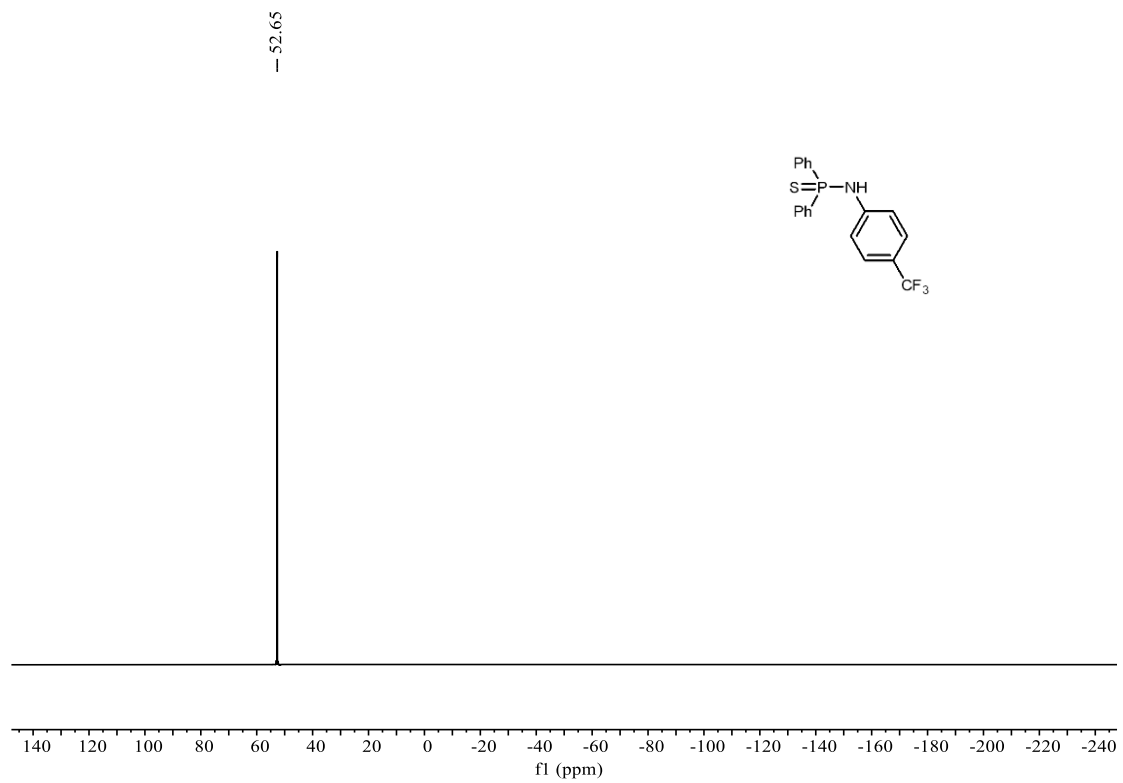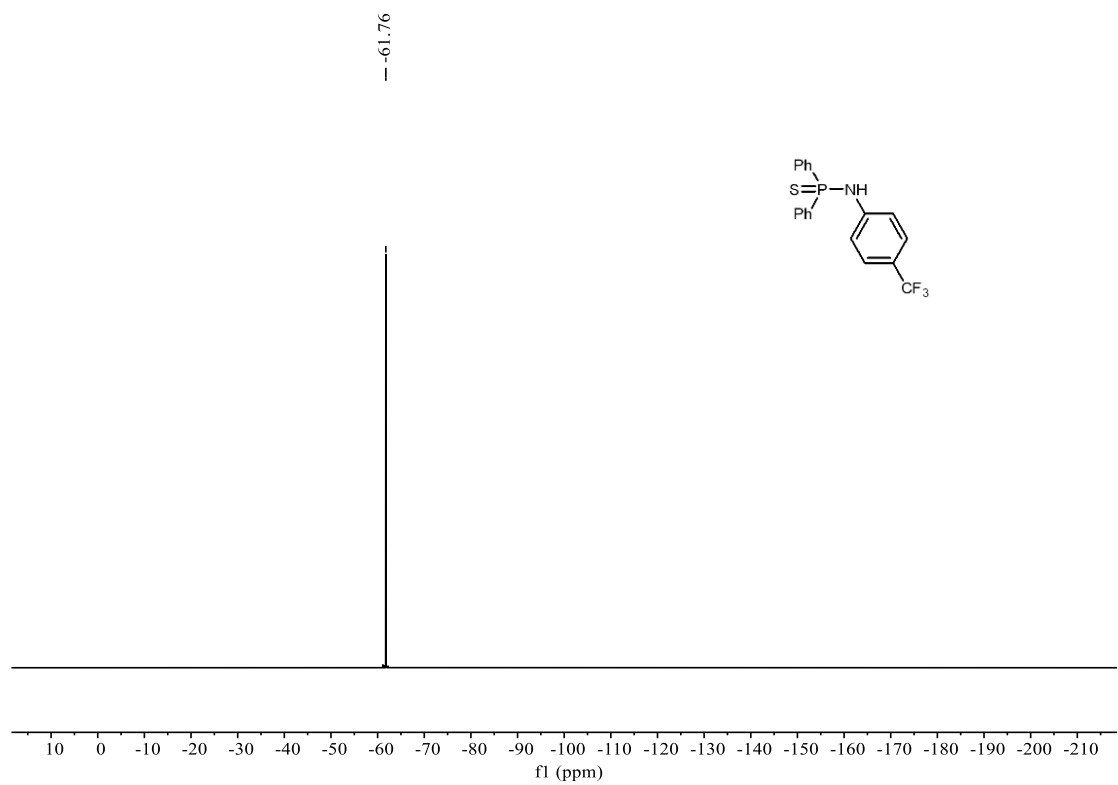

N-(4-methoxyphenyl)-P,P-diphenylphosphinothioic amide (**4af'**)

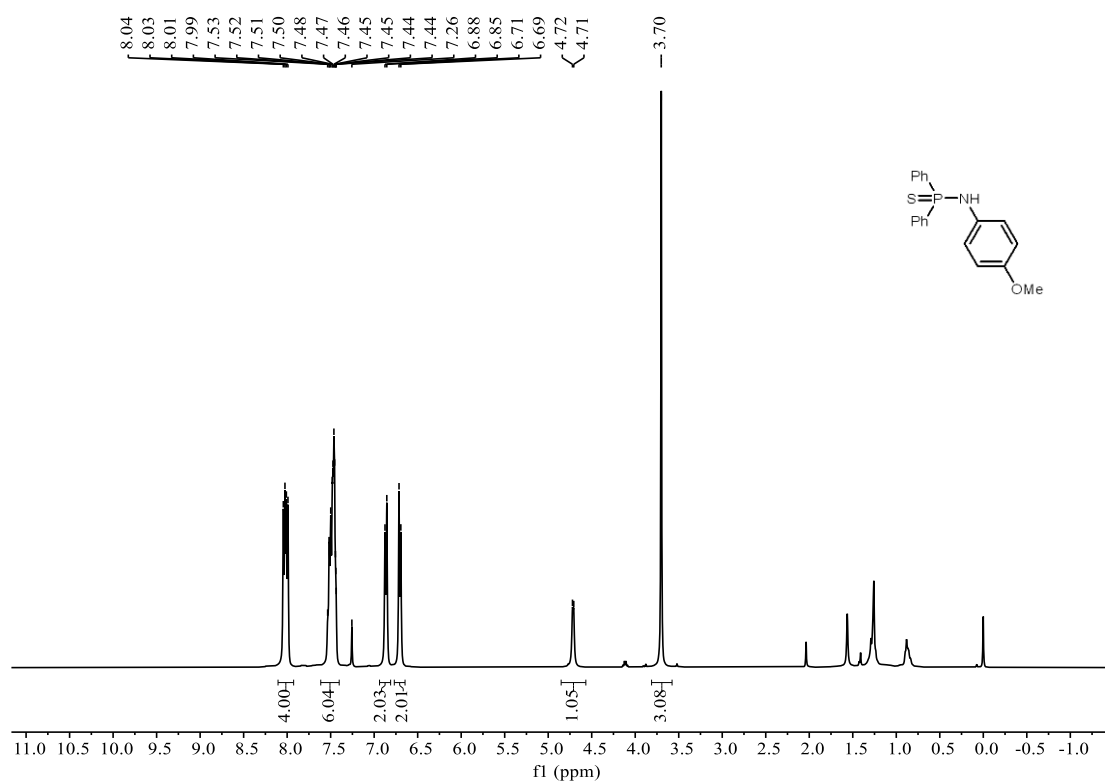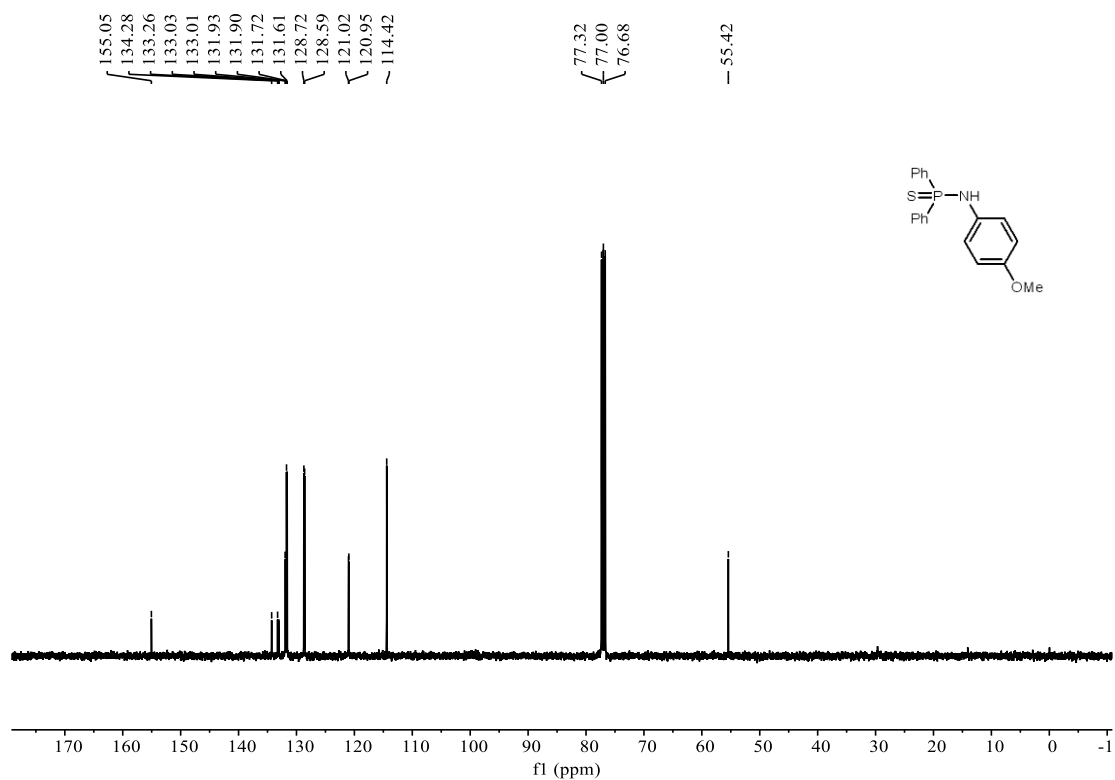

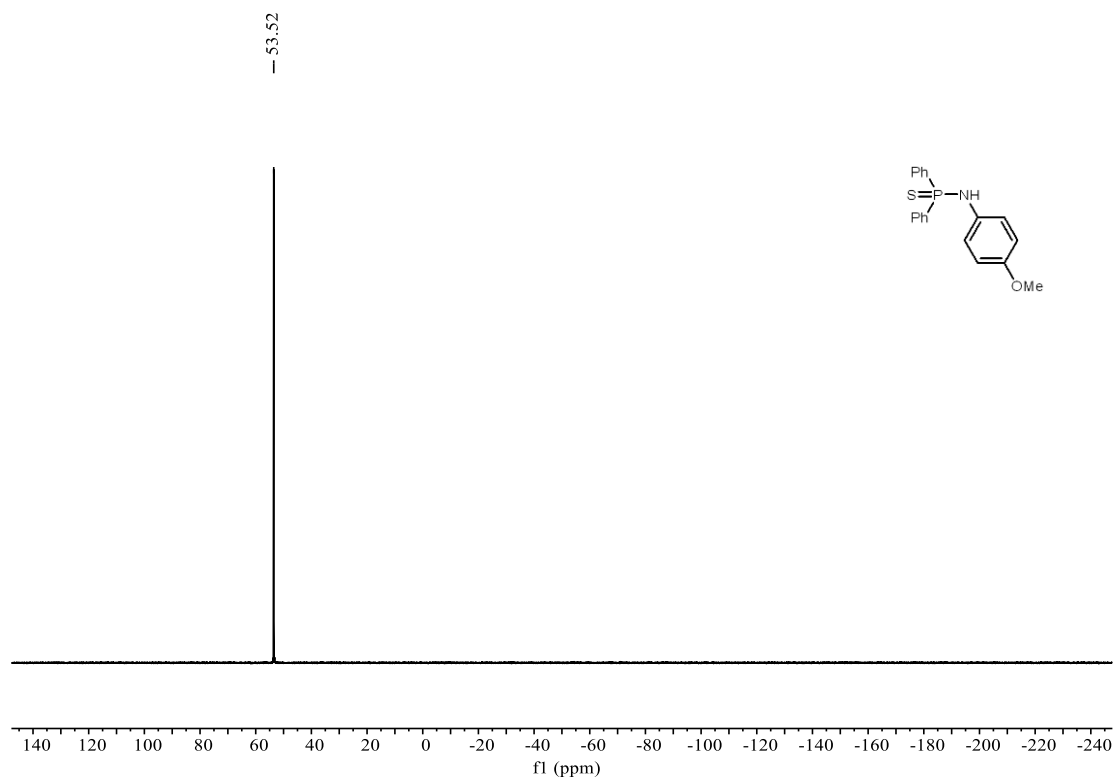

**N-(naphthalen-1-yl)-P,P-diphenylphosphinothioic amide (4ag')**

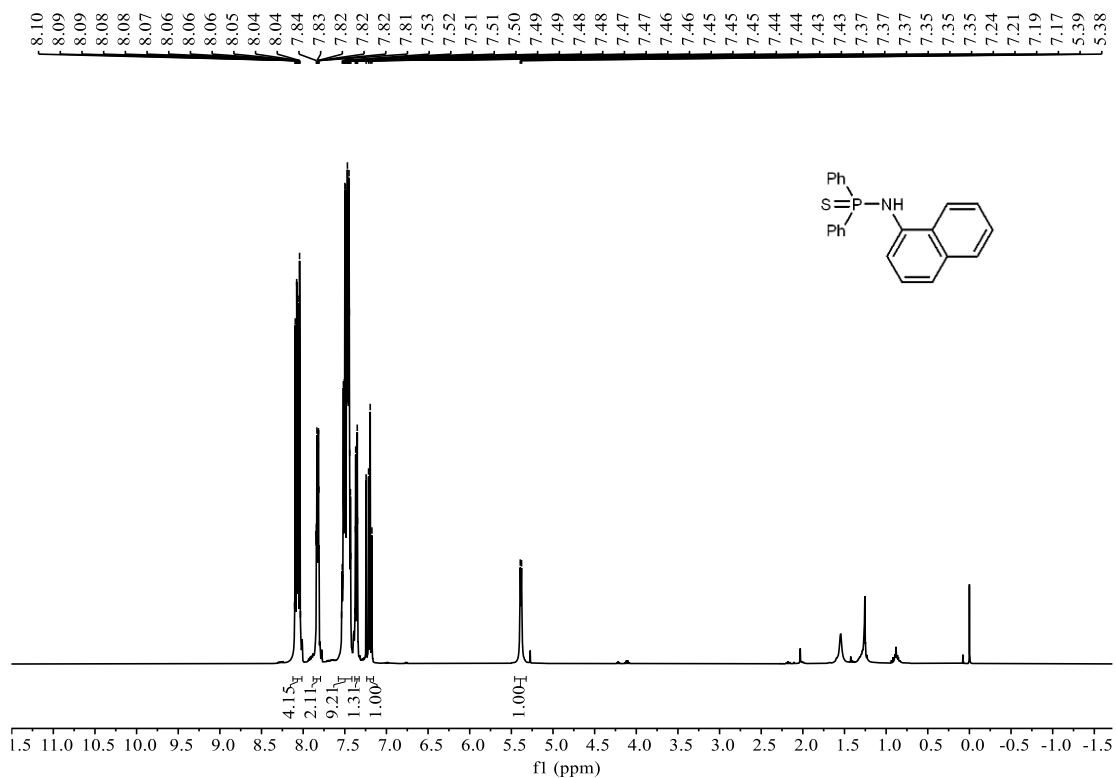

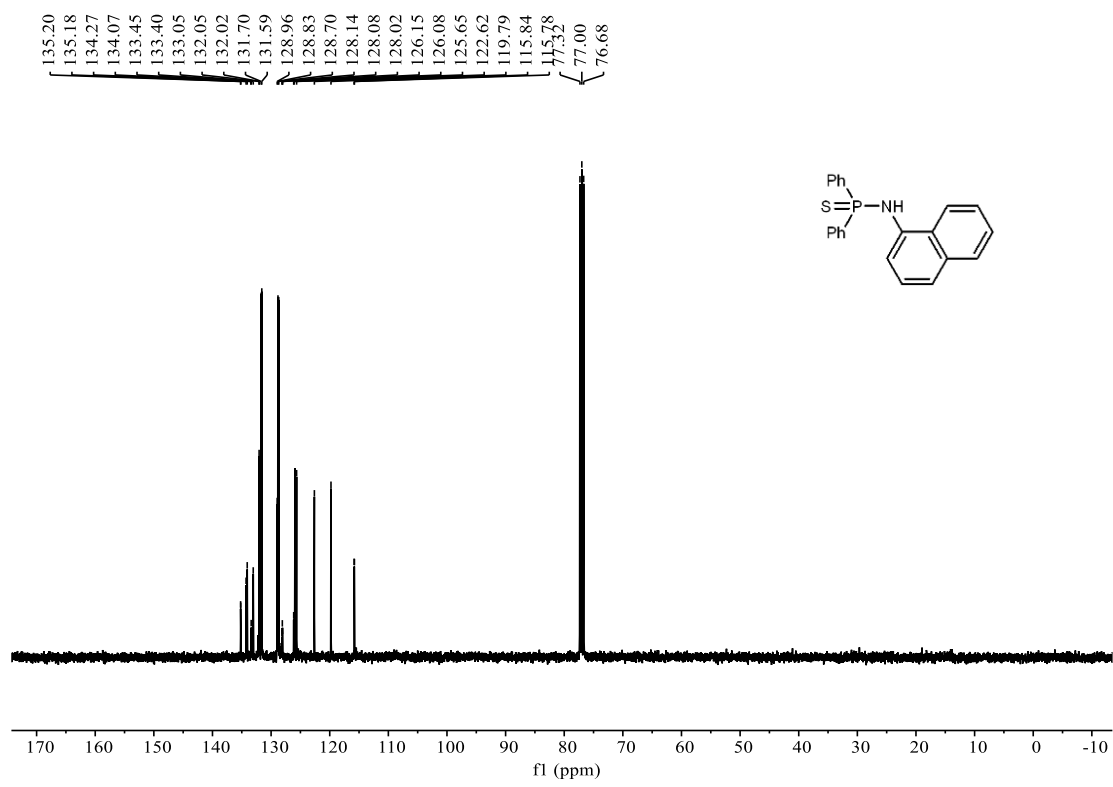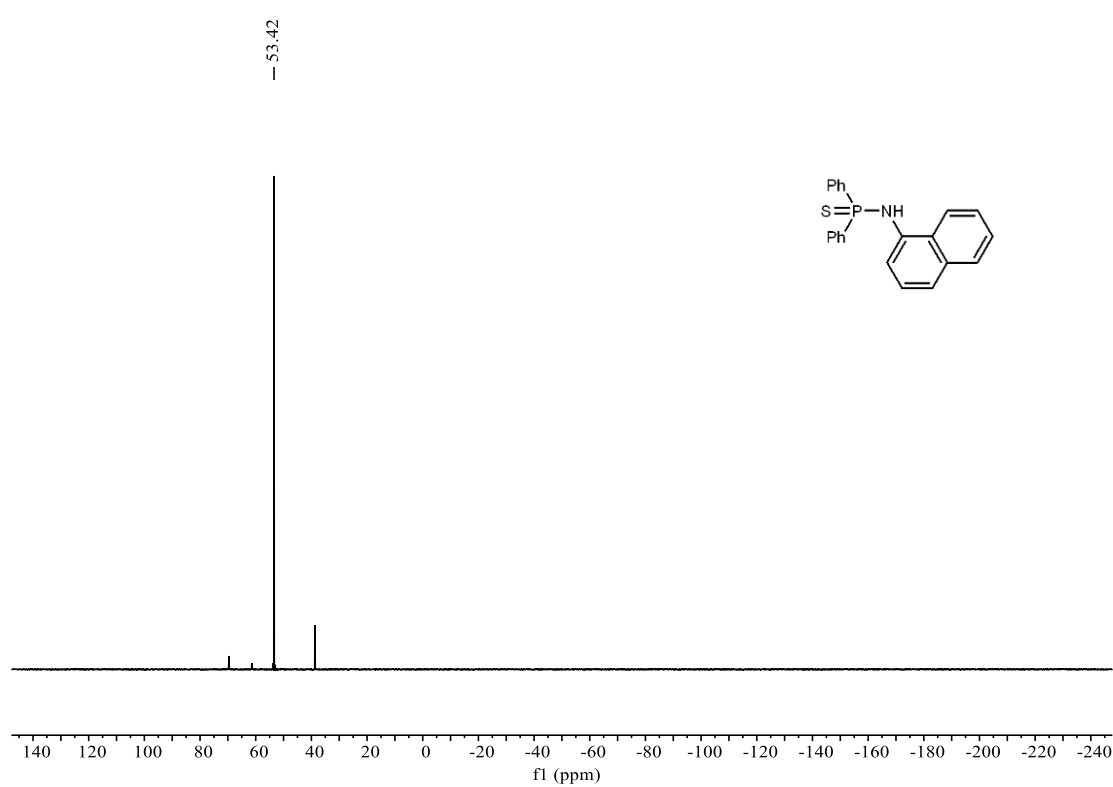

(9H-carbazol-9-yl)diphenylphosphine sulfide (**4ah'**)

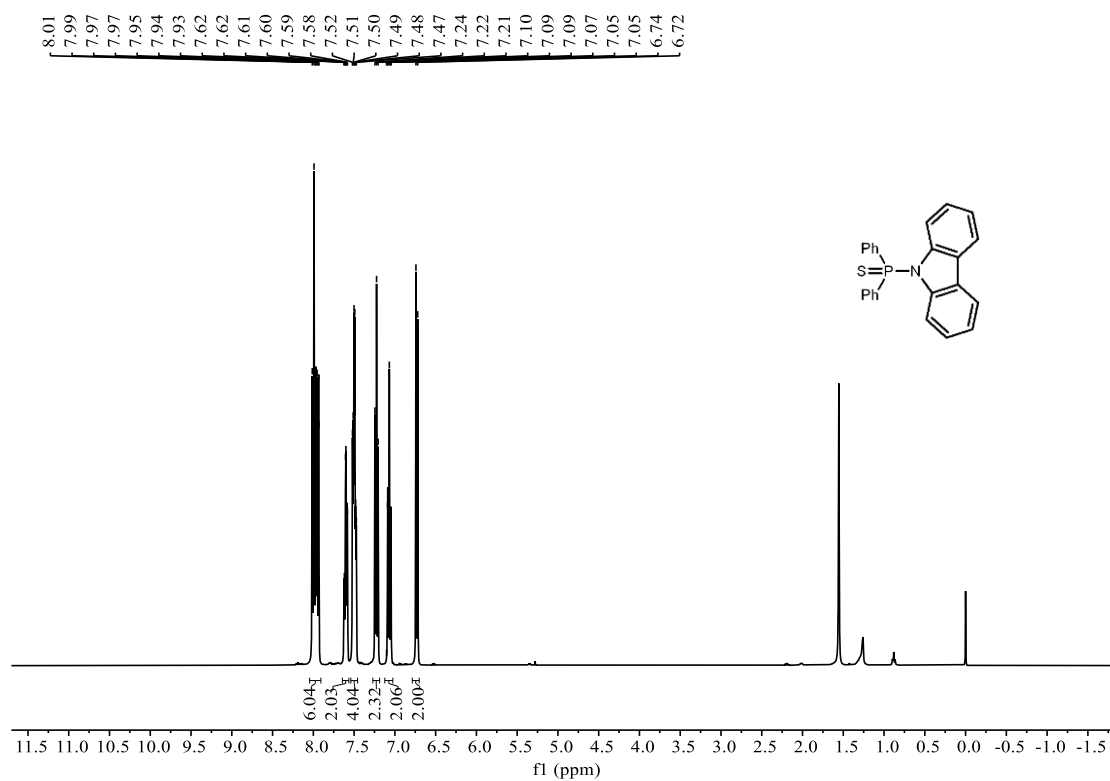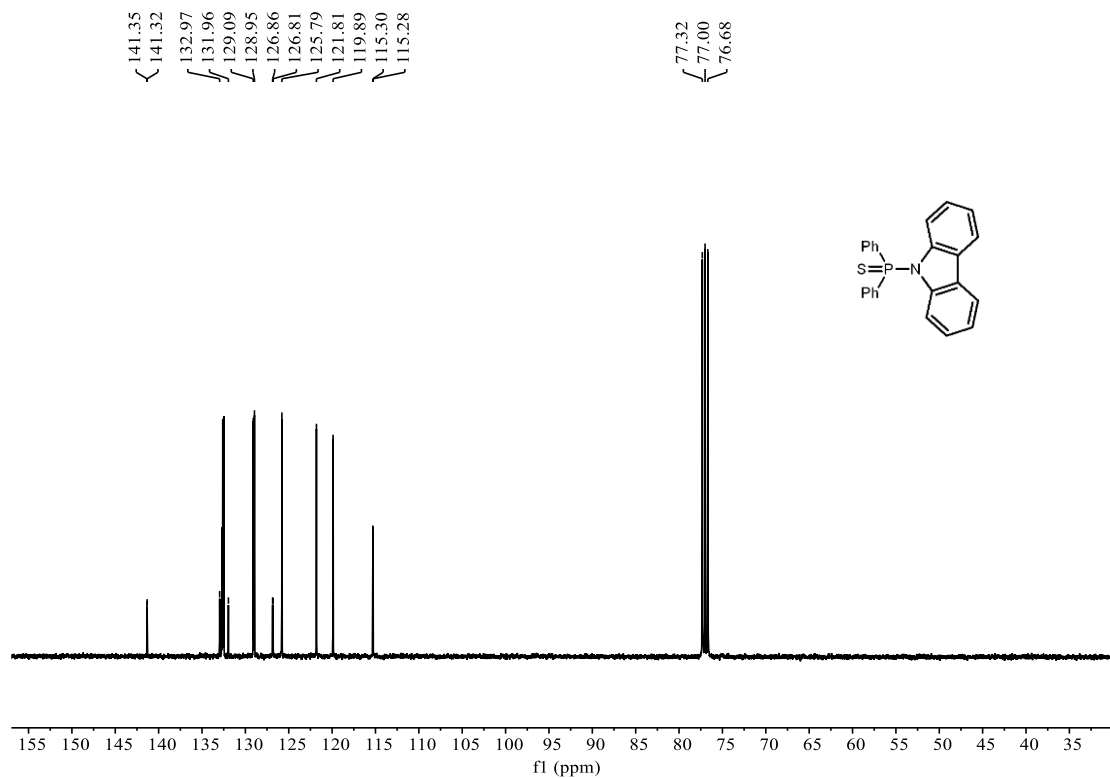

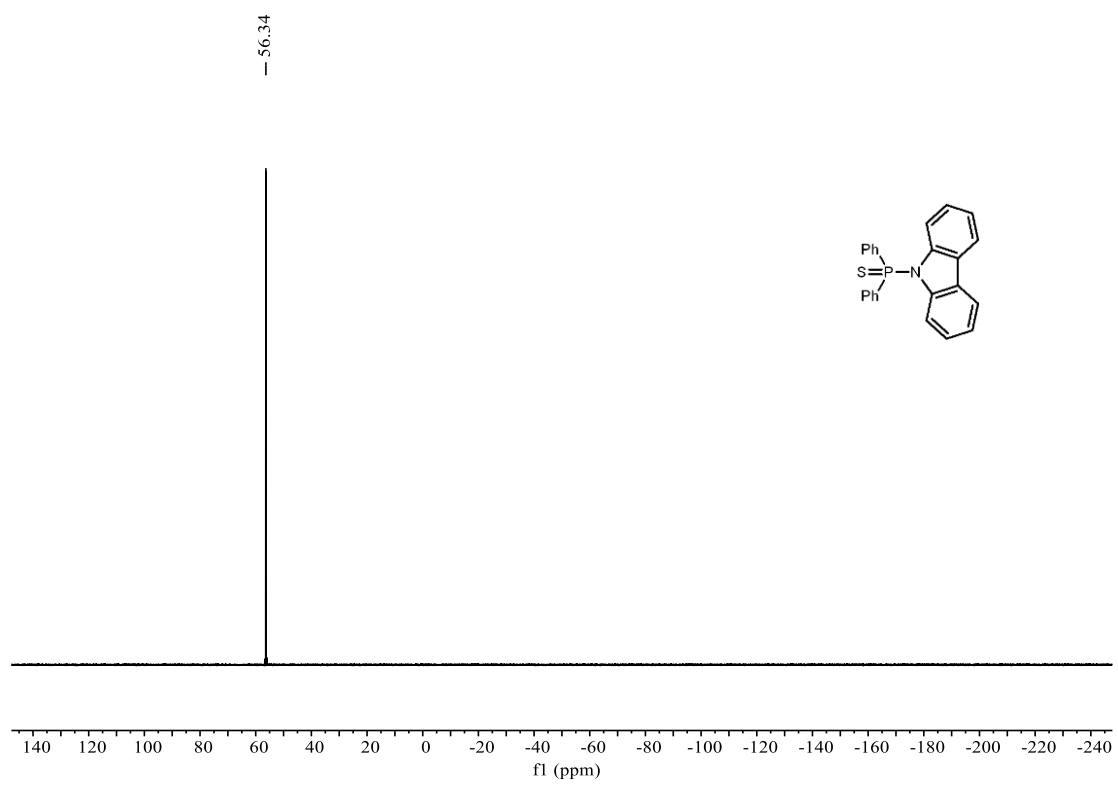

# Morpholindiphenylphosphine sulfide (4ai')

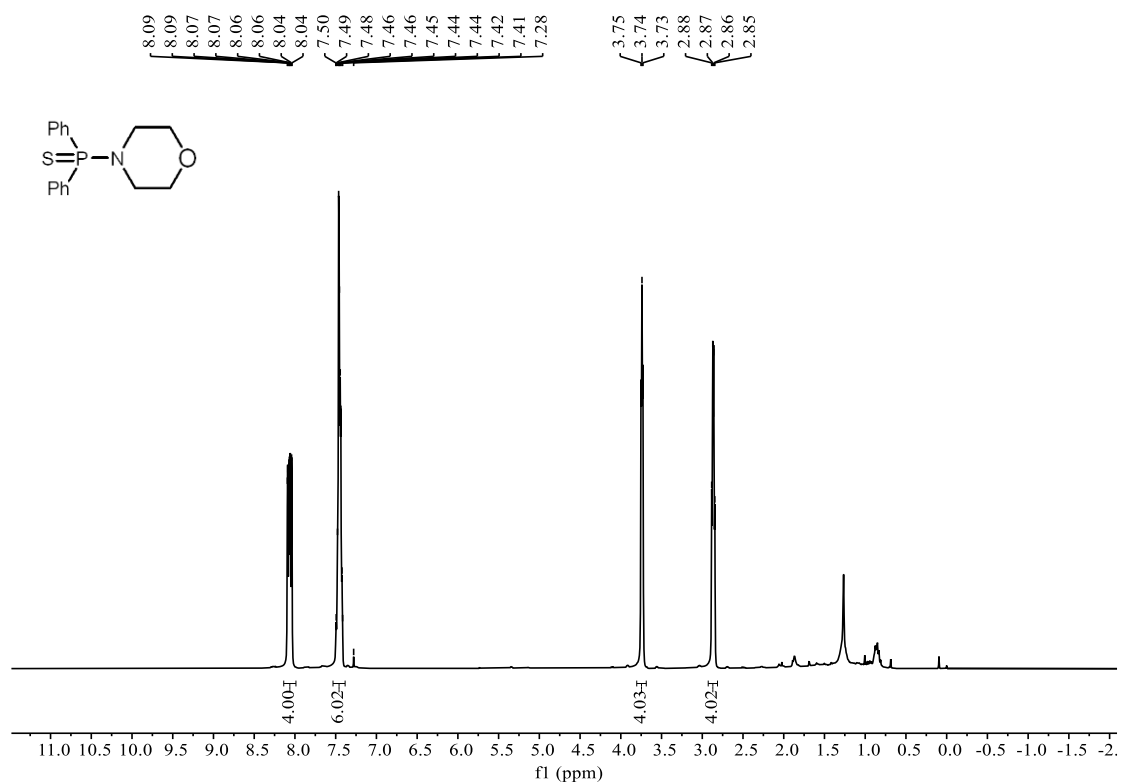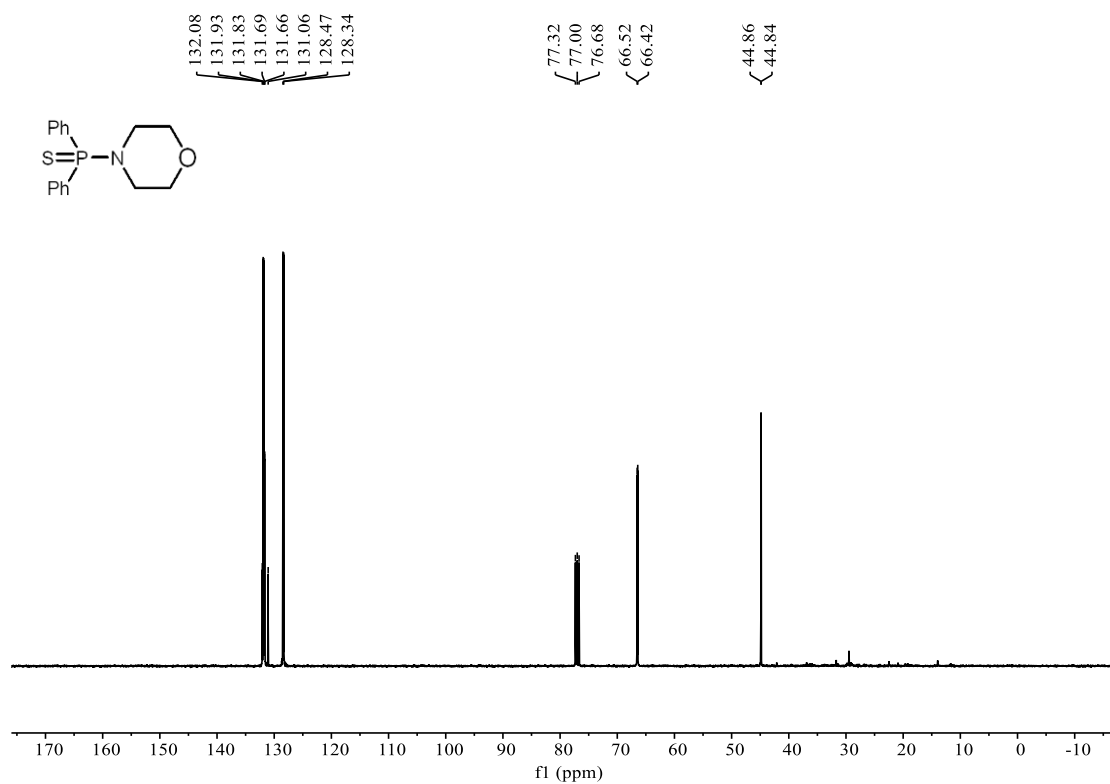



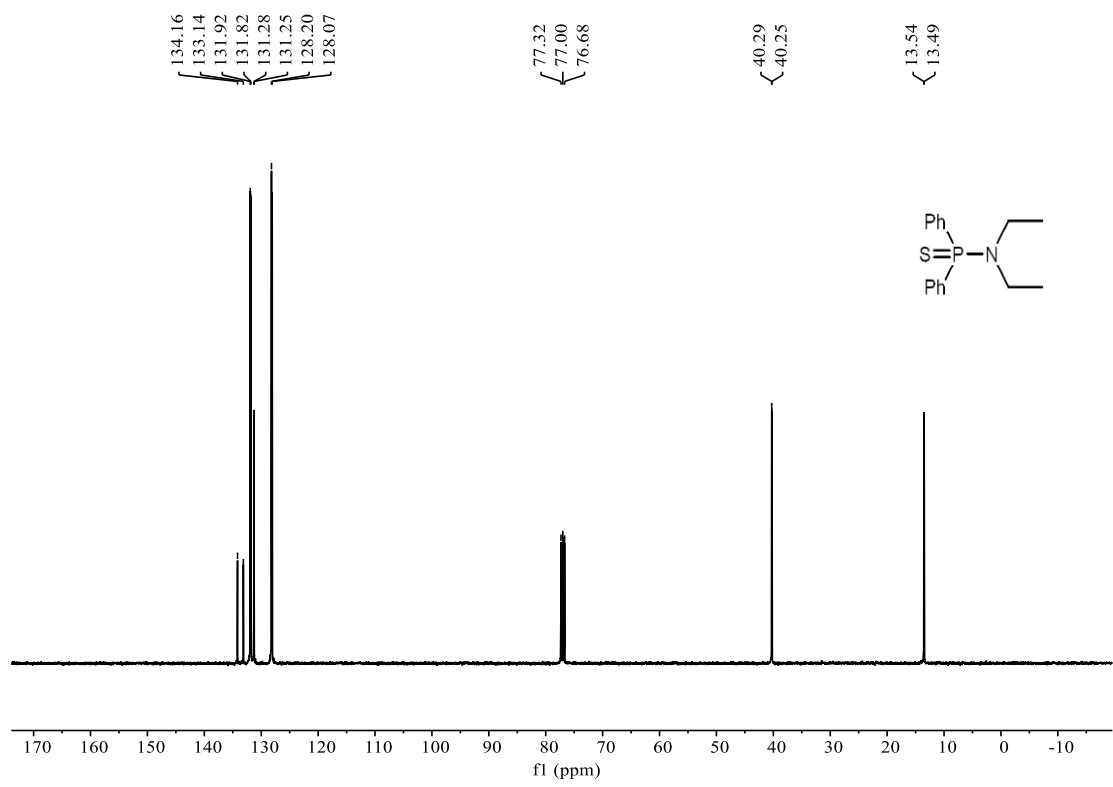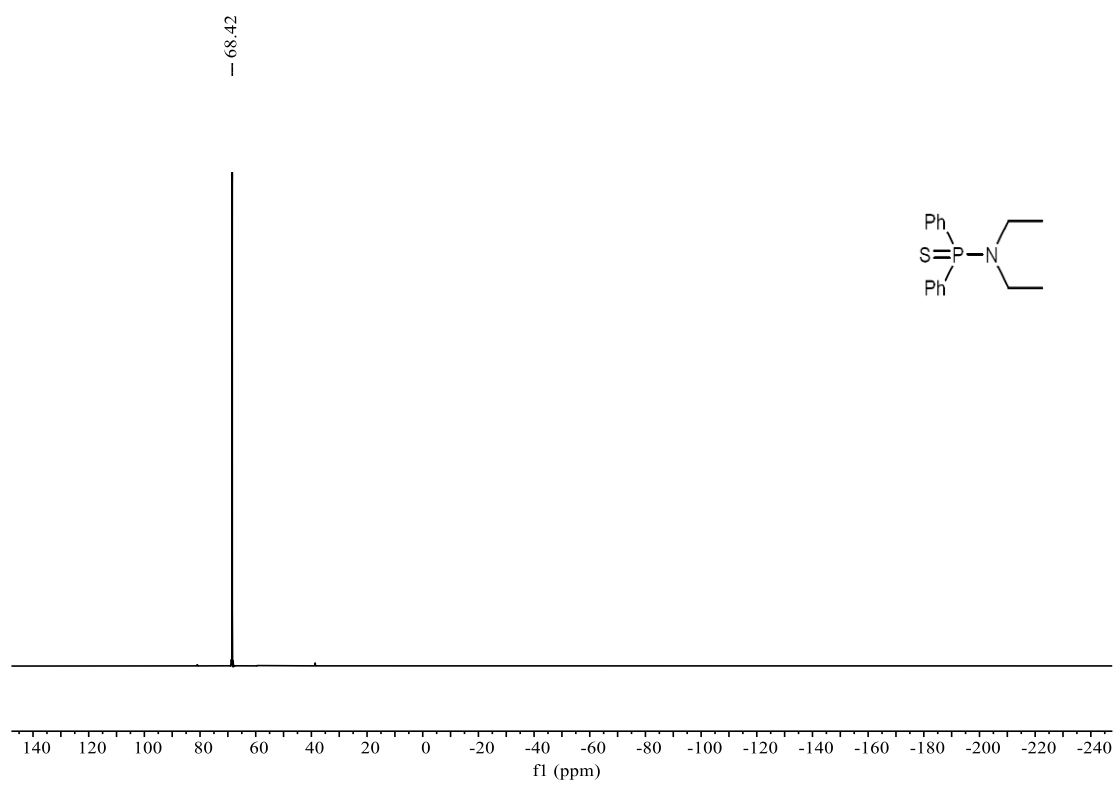

O-(4-((diphenylphosphorothioyl)thio)phenyl) diphenylphosphinothioate (**4ak'**)

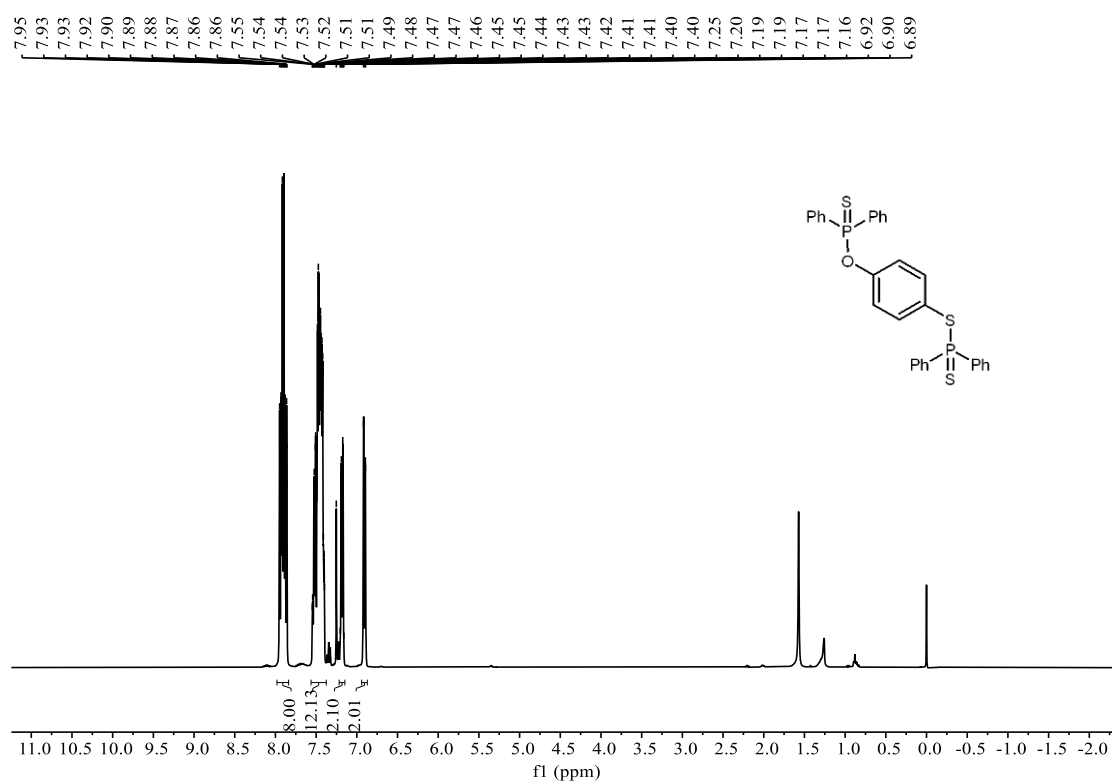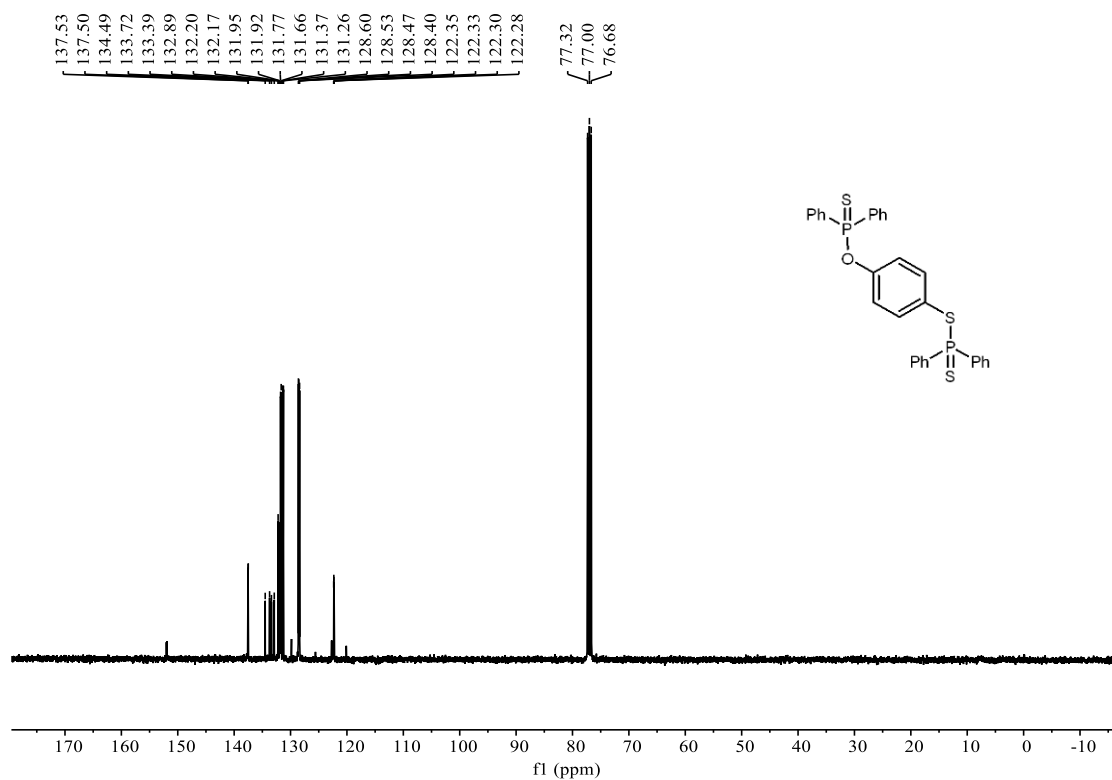

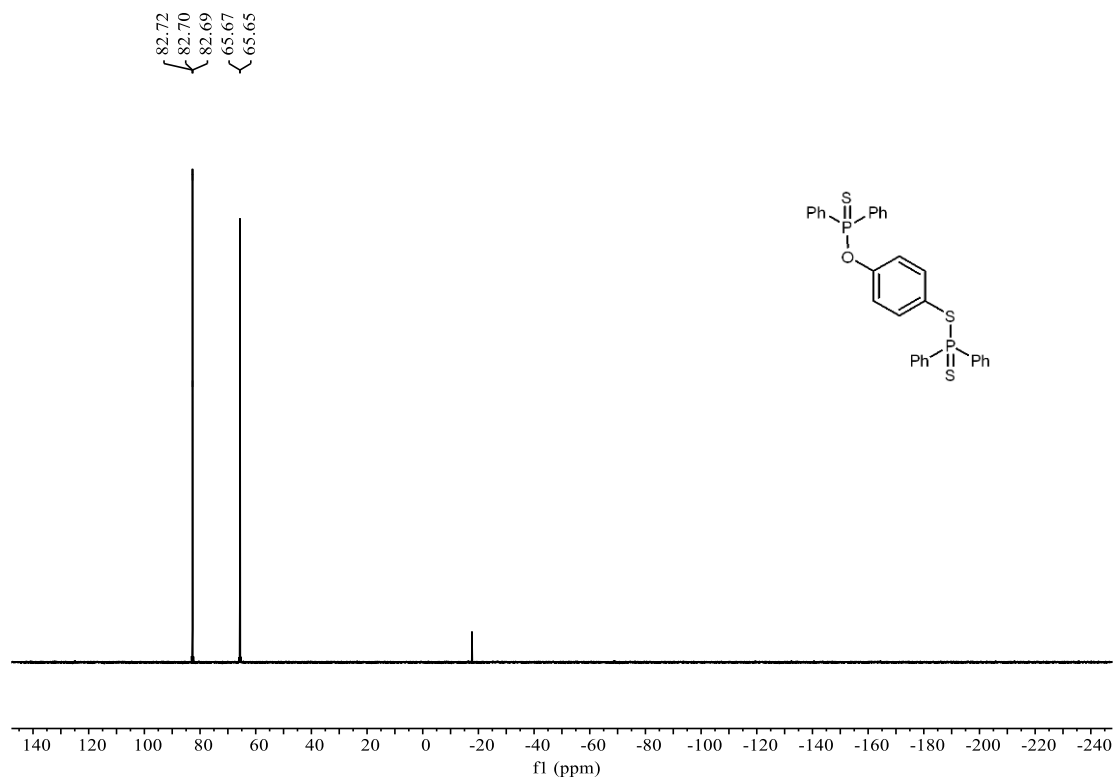

O-(4-((diphenylphosphorothioyl)amino)-2-methylphenyl) diphenylphosphinothioate (4aI')

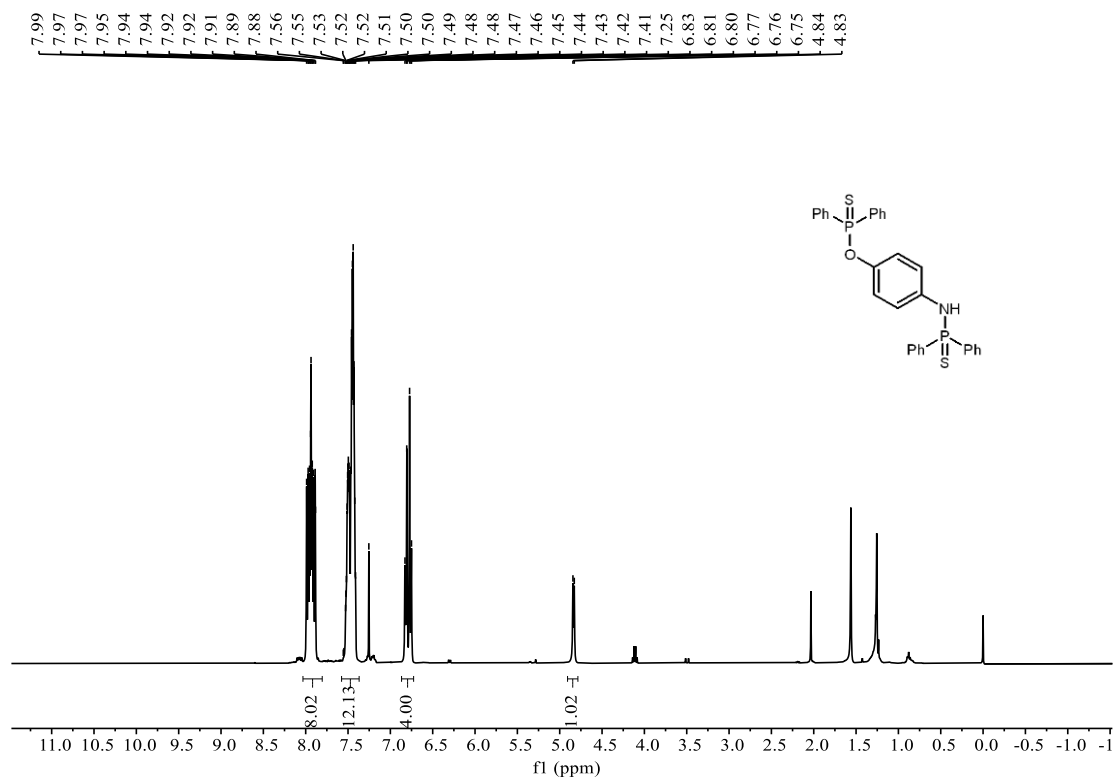

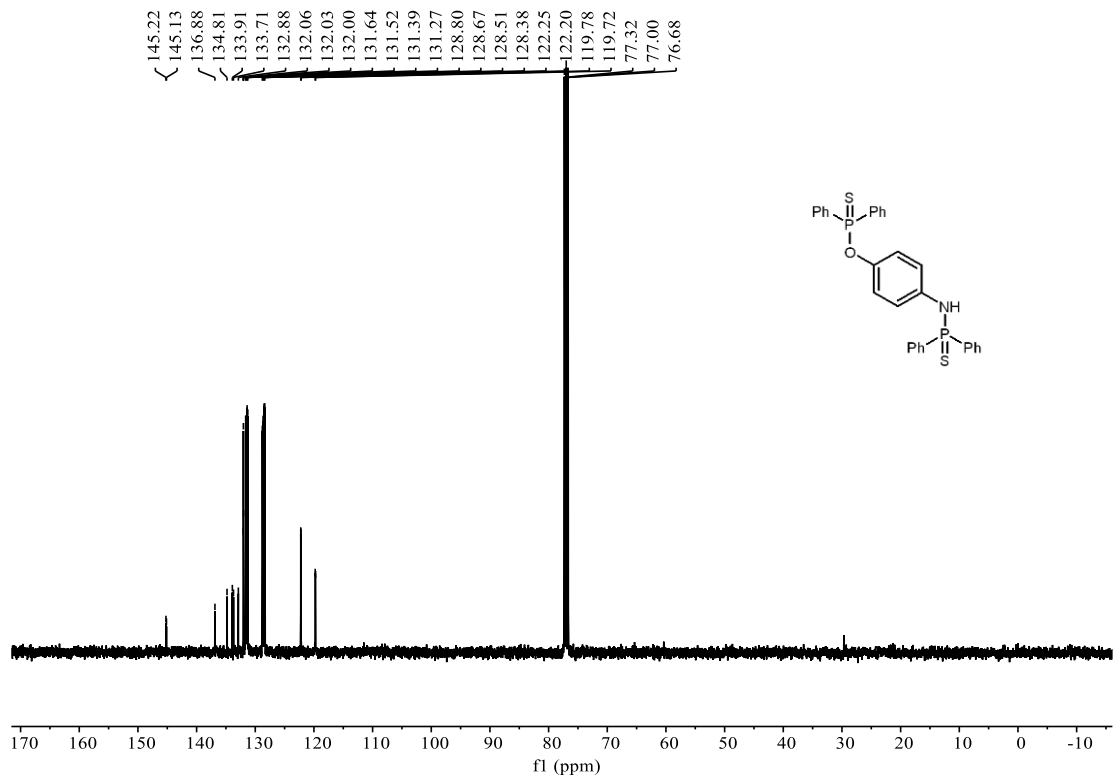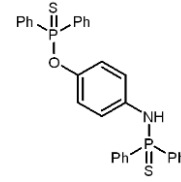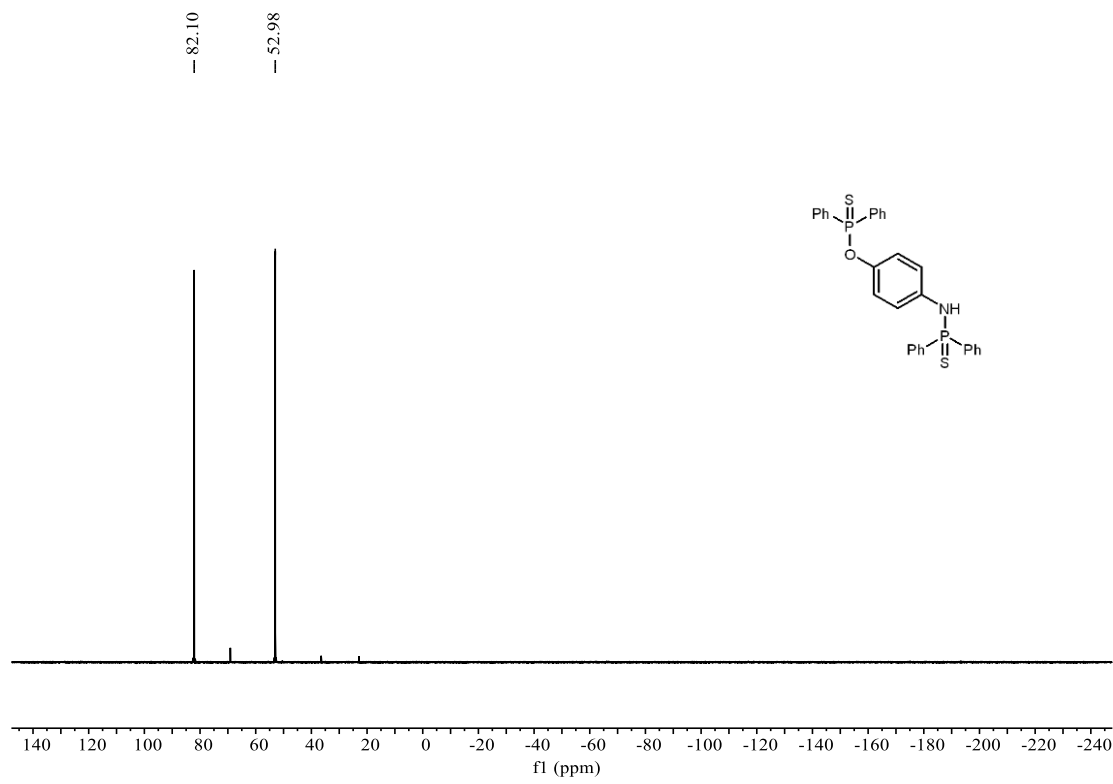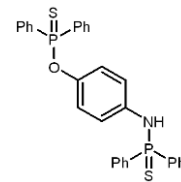

O-(4-((diphenylphosphorothioyl)amino)phenyl) diphenylphosphinothioate (**4am'**)

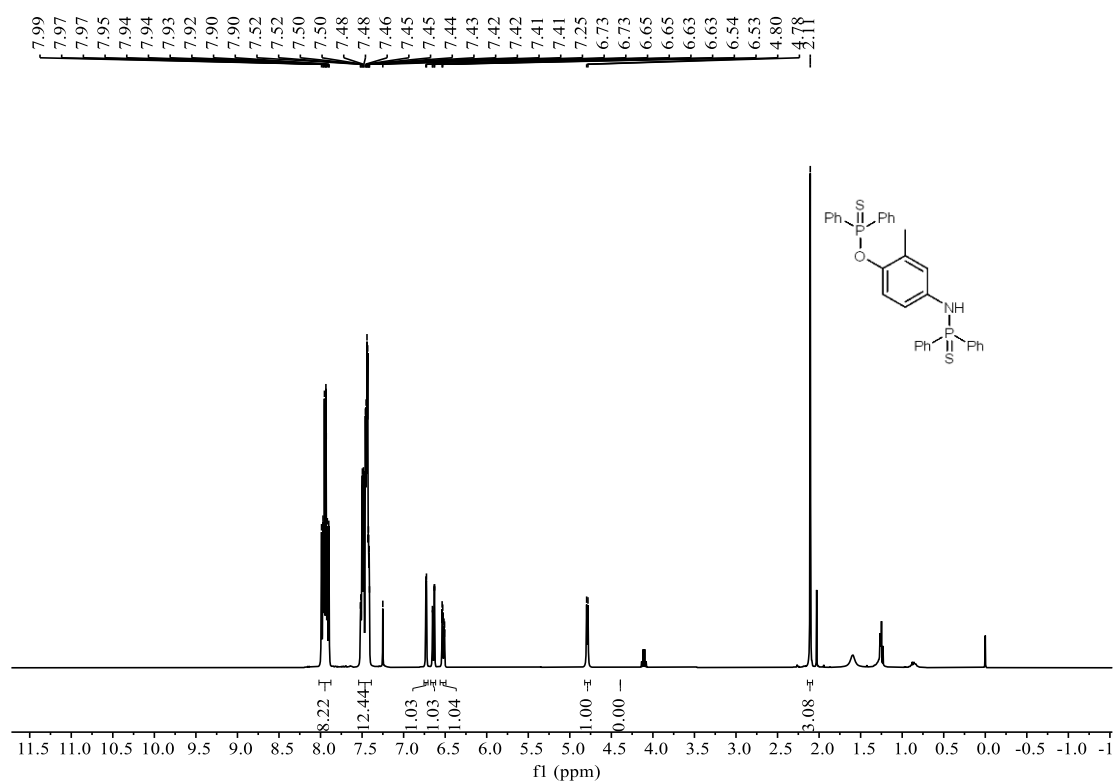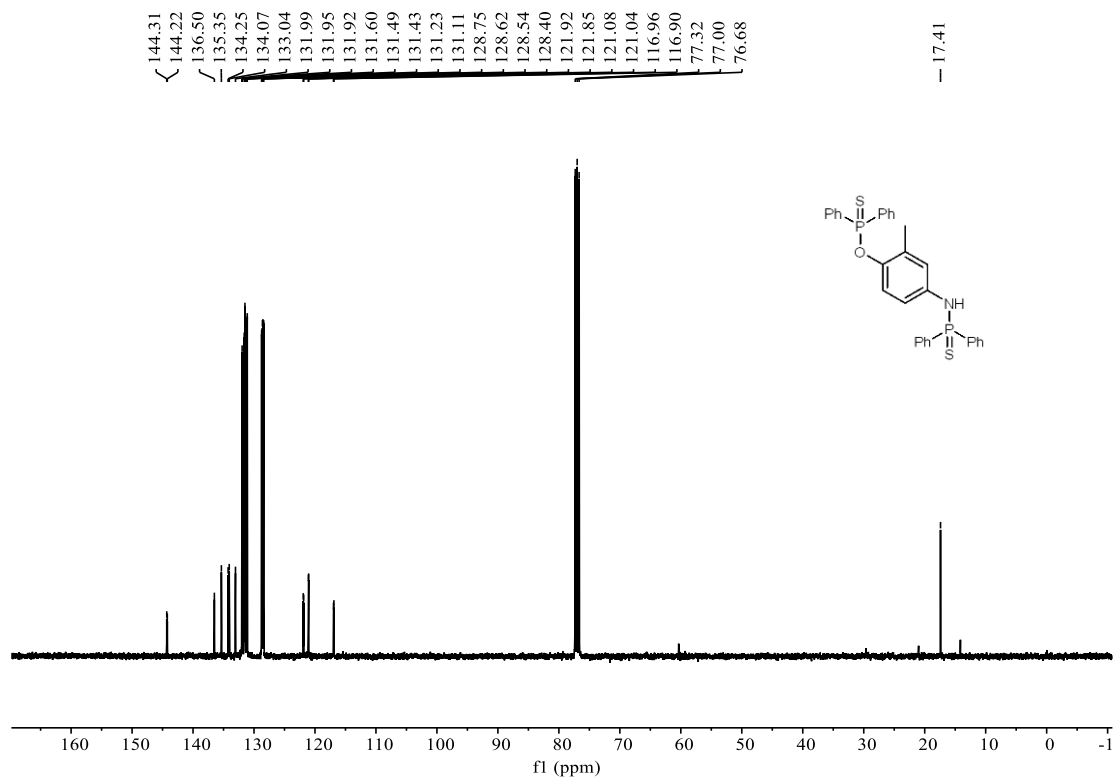

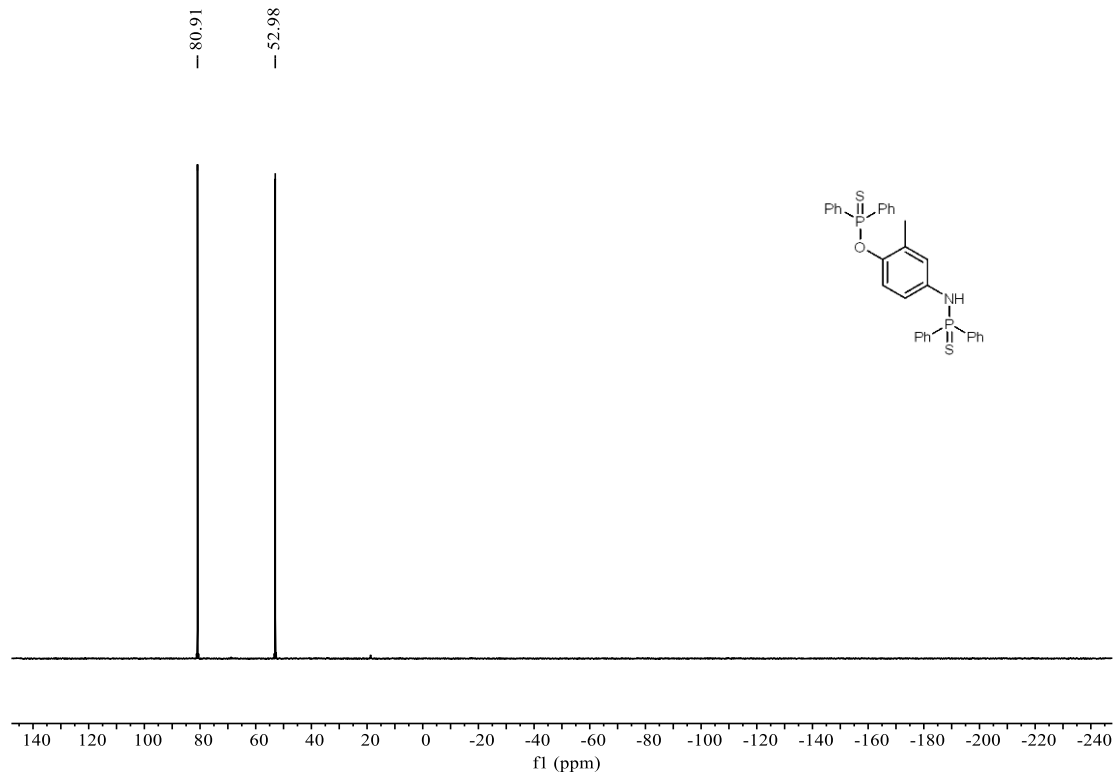

4-((Diphenylphosphorothioyl)amino)phenyl diphenylphosphinodithioate (**4an'**)

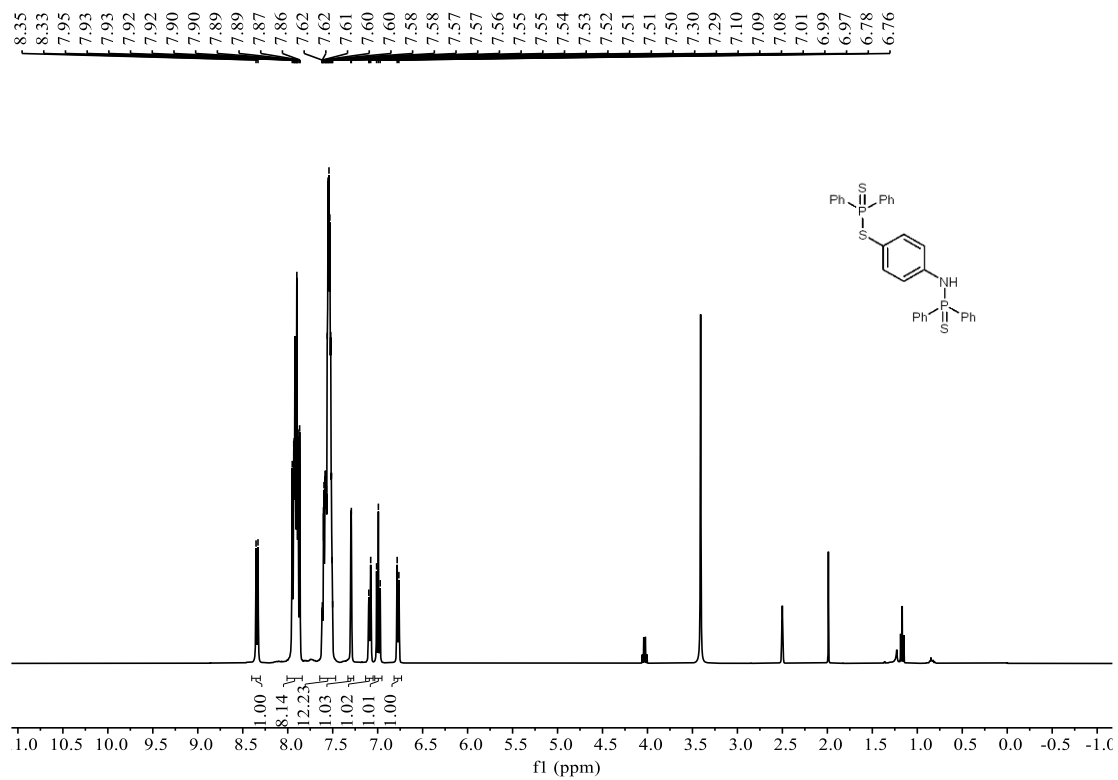

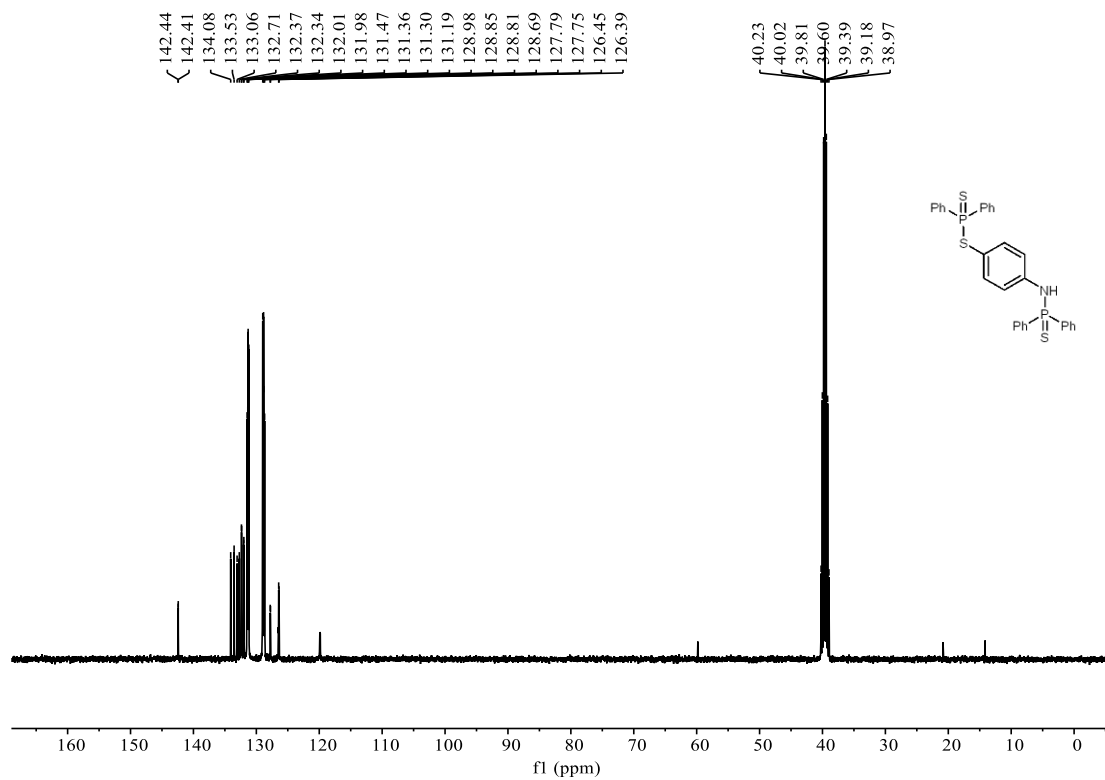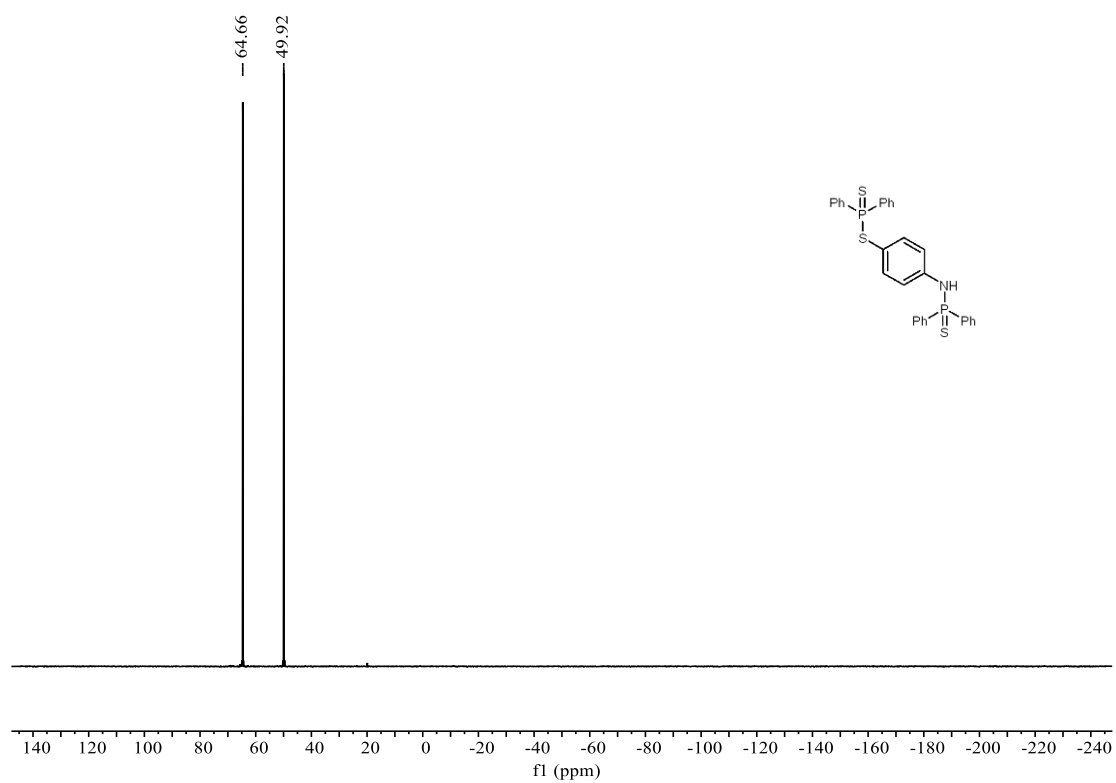

3-((Diphenylphosphorothioyl)amino)phenyl diphenylphosphinodithioate (**4a0'**)

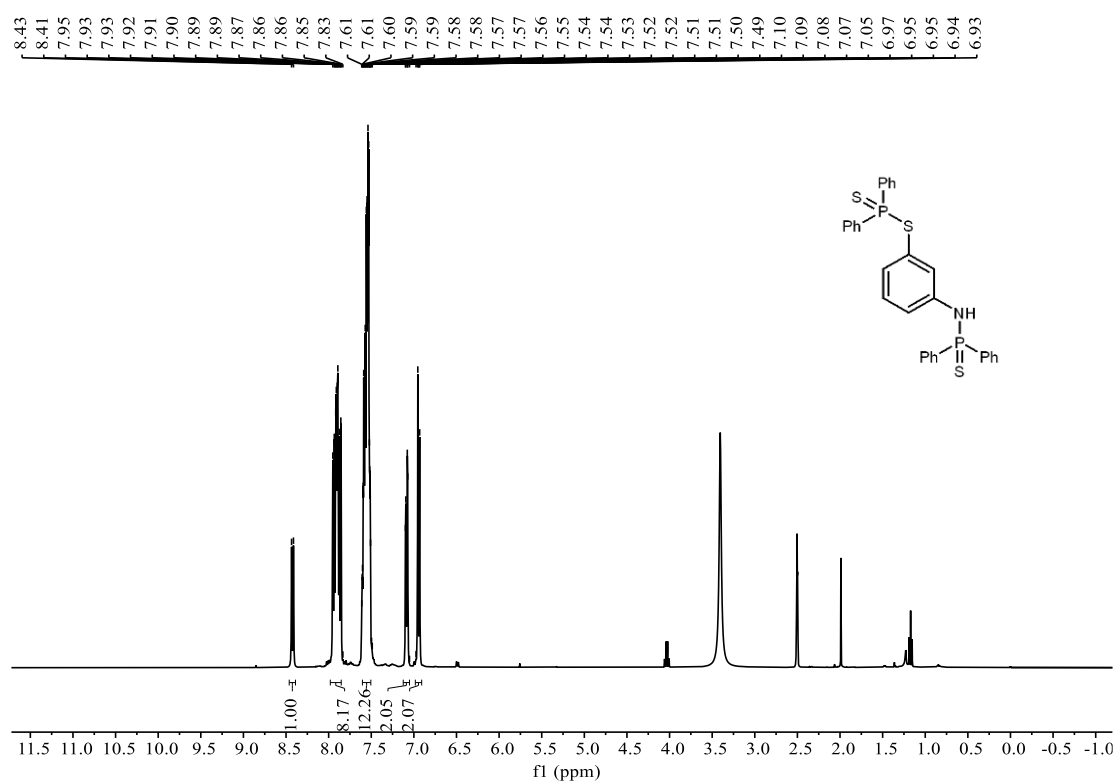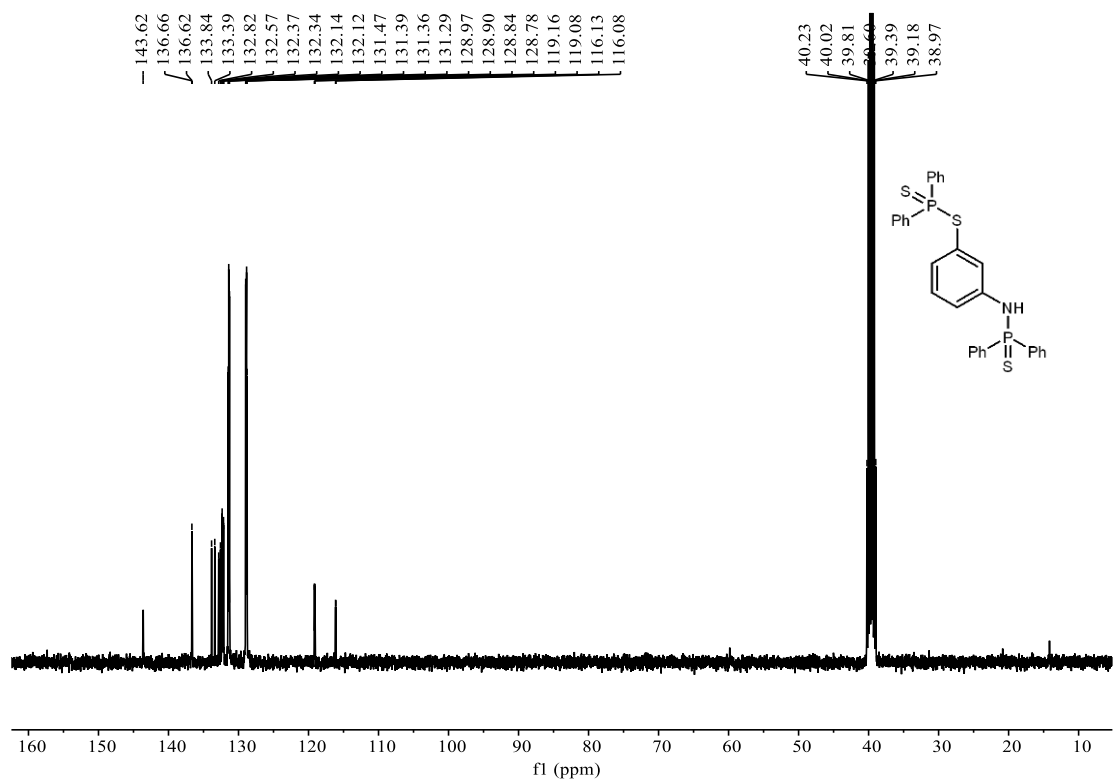

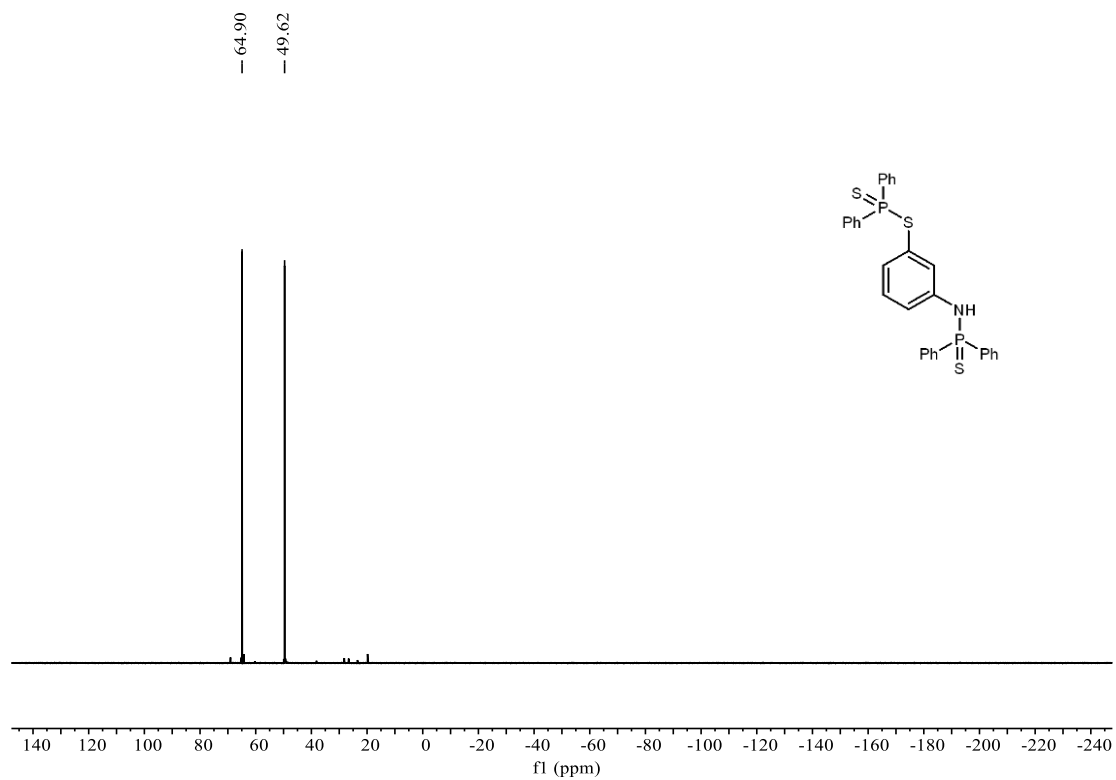

O-(3-((diphenylphosphorothioyl)thio)phenyl) diphenylphosphinothioate (**4ap'**)

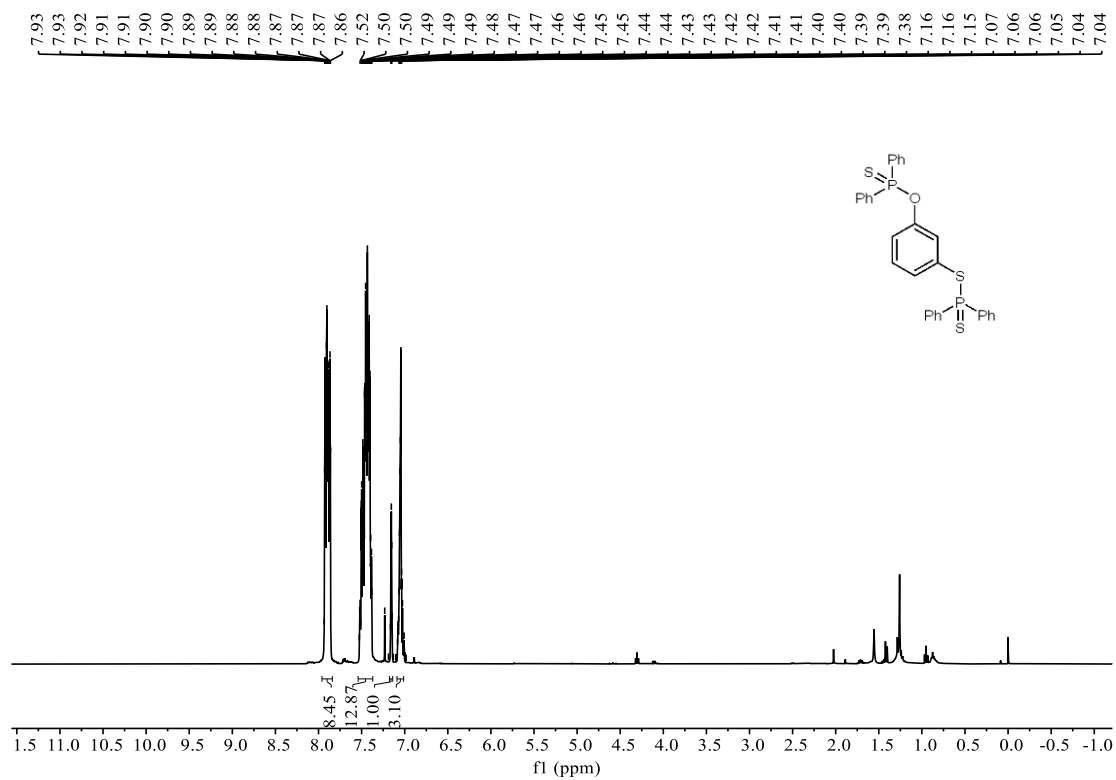

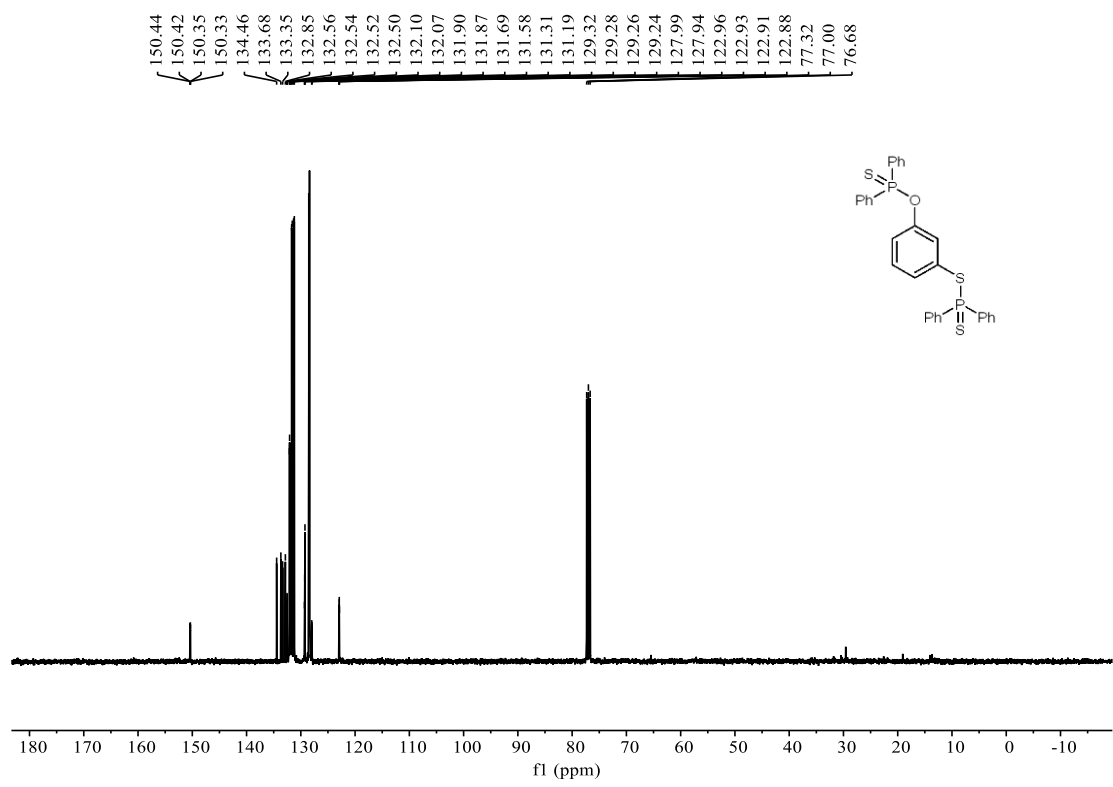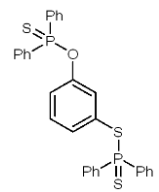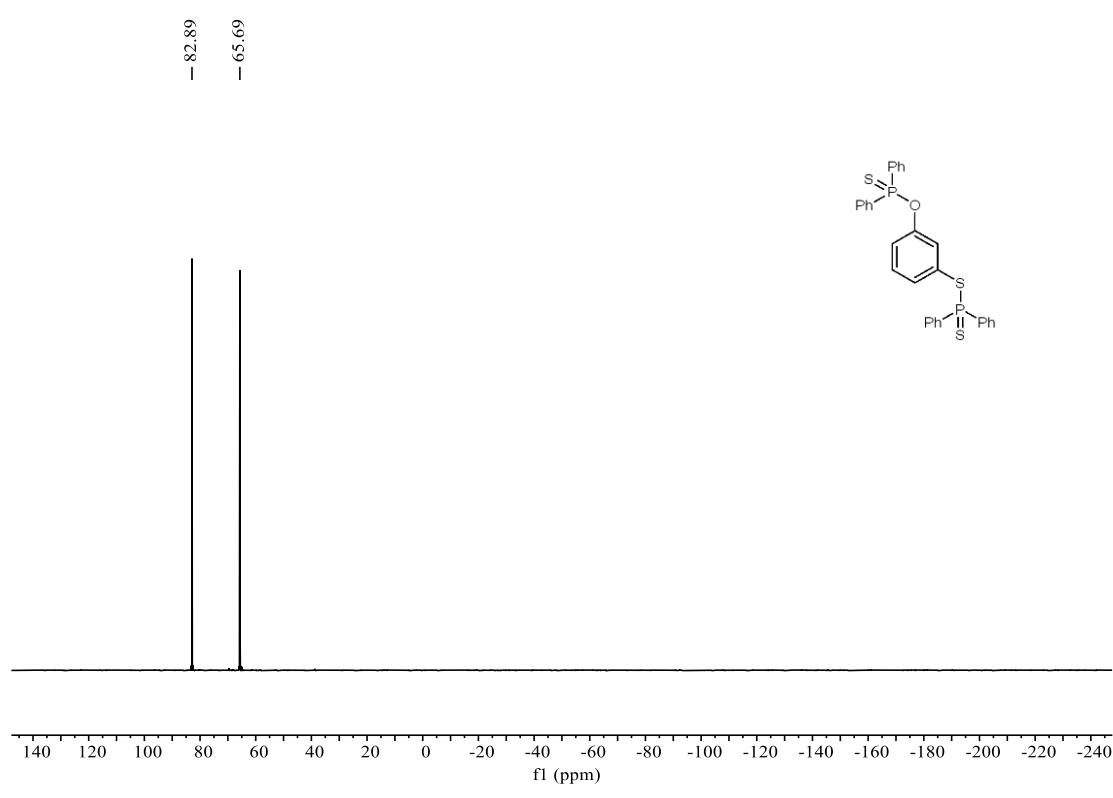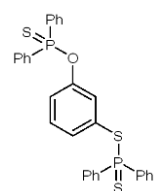

# 1,1,2,2-Tetraphenyldiphosphane (2a')

7.38  
7.38  
7.37  
7.37  
7.36  
7.35  
7.35  
7.26  
7.25  
7.24  
7.24  
7.23  
7.20  
7.19  
7.17

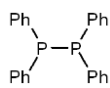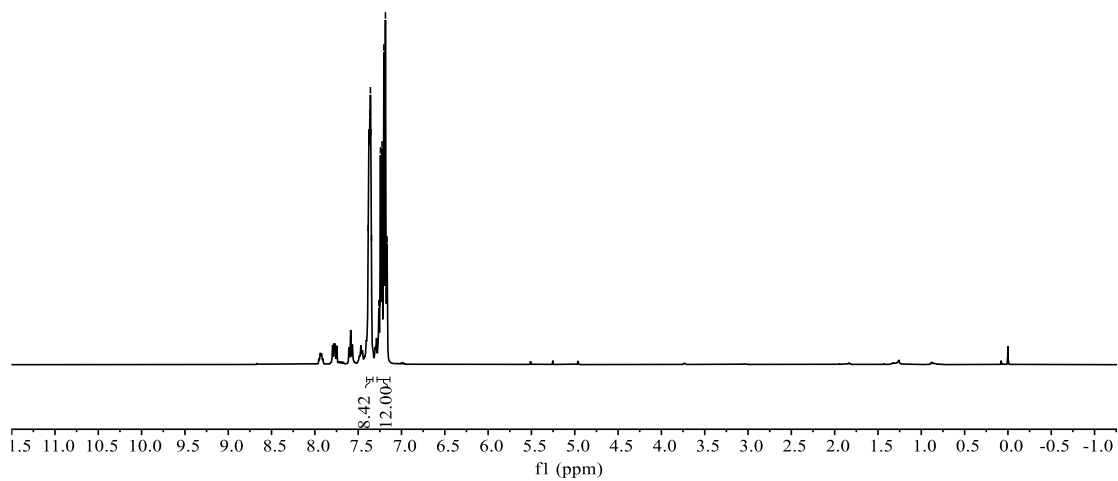

135.68  
135.63  
135.59  
134.41  
134.28  
134.15  
128.63  
128.21  
128.18  
128.14

77.32  
77.00  
76.68

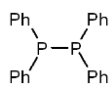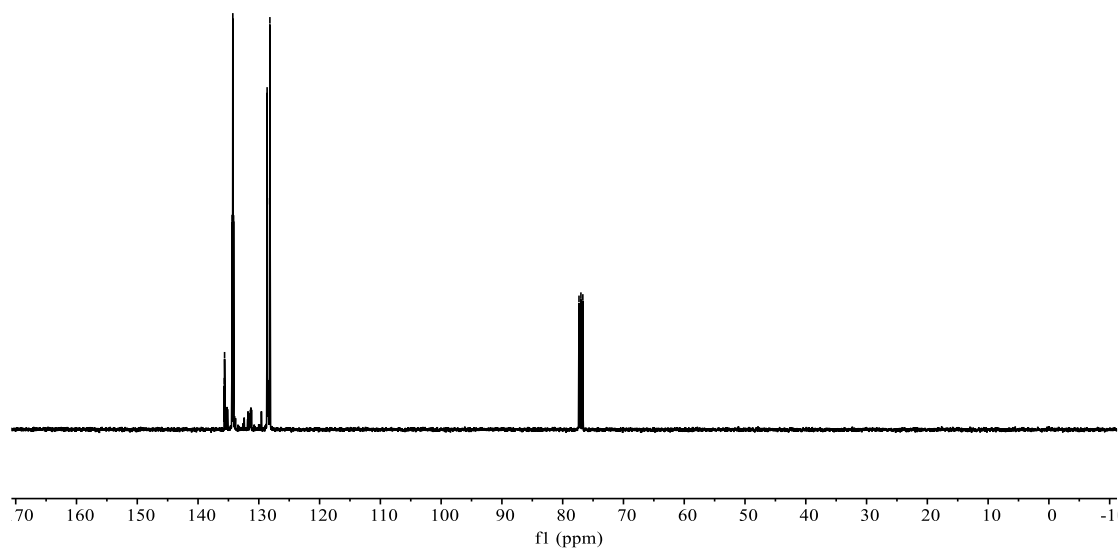

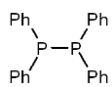

-14.92

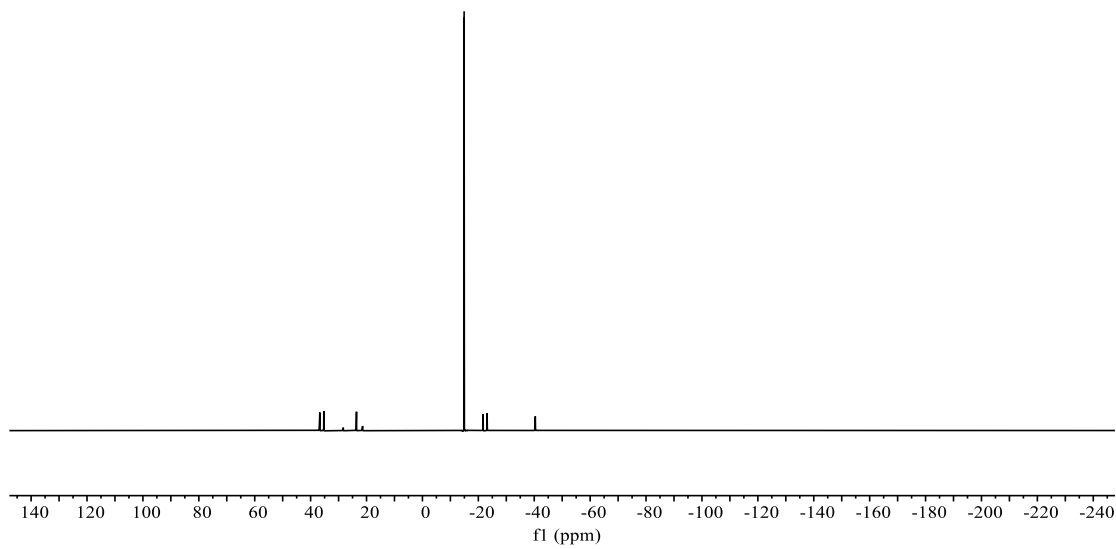

Supplement: d6gc00555a1.pdf [file d6gc00555a1.pdf]
